# Supplementary material for: A genetic toolkit and gene switches to limit Mycoplasma growth for a synthetic vaccine chassis
Source: Research Square preprint supplement (doi:10.21203/rs.3.rs-951697/v1), 2021-10-04
Supplement: Supplementary file 2 [file 70ee1749a0a996e687474077.xlsx]

## Sheet: C5_p2_2_S1
	SAMPLE	PASS	POS	QUAL	TOT	REFN	ALTN	FRAC	REF	ALT	EFF	IMPACT	AFF	MUT	ANN_TYPE
1	p2_2_S1	2	70	4.92735e-15	60	58	2	3.44828	C	T	upstream_gene_variant	MODIFIER	MPN001	c.-622C>T	intergenic
2	p2_2_S1	2	149	0	75	74	1	1.35135	T	C	upstream_gene_variant	MODIFIER	MPN001	c.-543T>C	intergenic
3	p2_2_S1	2	150	2.26391e-15	69	68	1	1.47059	A	T	upstream_gene_variant	MODIFIER	MPN001	c.-542A>T	intergenic
4	p2_2_S1	2	154	0	62	61	1	1.63934	T	C	upstream_gene_variant	MODIFIER	MPN001	c.-538T>C	intergenic
5	p2_2_S1	2	176	3.42082e-15	58	57	1	1.75439	TAAT	CAAC	upstream_gene_variant	MODIFIER	MPN001	c.-516_-513delTAATinsCAAC	intergenic
6	p2_2_S1	2	195	3.08156e-15	54	53	1	1.88679	T	C	upstream_gene_variant	MODIFIER	MPN001	c.-497T>C	intergenic
7	p2_2_S1	2	249	1.23578e-15	77	75	2	2.66667	T	C	upstream_gene_variant	MODIFIER	MPN001	c.-443T>C	intergenic
8	p2_2_S1	2	259	0	74	72	2	2.77778	TTATCTT	CTATGTT	upstream_gene_variant	MODIFIER	MPN001	c.-433_-429delTTATCinsCTATG	intergenic
9	p2_2_S1	2	275	0	87	86	1	1.16279	T	A	upstream_gene_variant	MODIFIER	MPN001	c.-417T>A	intergenic
10	p2_2_S1	2	300	3.84224e-16	69	67	2	2.98507	TAA	CAG	upstream_gene_variant	MODIFIER	MPN001	c.-392_-390delTAAinsCAG	intergenic
11	p2_2_S1	2	305	2.78986e-16	69	68	1	1.47059	TT	AA	upstream_gene_variant	MODIFIER	MPN001	c.-387_-386delTTinsAA	intergenic
12	p2_2_S1	2	339	3.58633e-15	67	66	1	1.51515	TAT	CAC	upstream_gene_variant	MODIFIER	MPN001	c.-353_-351delTATinsCAC	intergenic
13	p2_2_S1	2	350	3.60116e-15	72	70	2	2.85714	TACTAAA	AACAAAG	upstream_gene_variant	MODIFIER	MPN001	c.-342_-336delTACTAAAinsAACAAAG	intergenic
14	p2_2_S1	2	384	1.35656e-15	68	66	2	3.0303	A	C	upstream_gene_variant	MODIFIER	MPN001	c.-308A>C	intergenic
15	p2_2_S1	2	400	1.91359e-15	74	73	1	1.36986	C	A	upstream_gene_variant	MODIFIER	MPN001	c.-292C>A	intergenic
16	p2_2_S1	2	405	2.0492e-15	65	64	1	1.5625	C	G	upstream_gene_variant	MODIFIER	MPN001	c.-287C>G	intergenic
17	p2_2_S1	2	471	7.45871e-15	66	65	1	1.53846	T	C	upstream_gene_variant	MODIFIER	MPN001	c.-221T>C	intergenic
18	p2_2_S1	2	475	0	63	61	2	3.27869	C	A	upstream_gene_variant	MODIFIER	MPN001	c.-217C>A	intergenic
19	p2_2_S1	2	502	1.44696e-15	49	48	1	2.08333	T	C	upstream_gene_variant	MODIFIER	MPN001	c.-190T>C	intergenic
20	p2_2_S1	2	525	0	38	37	1	2.7027	T	A	upstream_gene_variant	MODIFIER	MPN001	c.-167T>A	intergenic
21	p2_2_S1	2	530	9.64327e-16	40	39	1	2.5641	TTATA	CTATT	upstream_gene_variant	MODIFIER	MPN001	c.-162_-158delTTATAinsCTATT	intergenic
22	p2_2_S1	2	552	8.55323e-16	33	32	1	3.125	A	G	upstream_gene_variant	MODIFIER	MPN001	c.-140A>G	intergenic
23	p2_2_S1	2	565	8.55323e-16	33	32	1	3.125	T	C	upstream_gene_variant	MODIFIER	MPN001	c.-127T>C	intergenic
24	p2_2_S1	2	616	0	39	38	1	2.63158	A	T	upstream_gene_variant	MODIFIER	MPN001	c.-76A>T	intergenic
25	p2_2_S1	2	668	5.61269e-16	46	45	1	2.22222	AAGCAA	TAGCTG	upstream_gene_variant	MODIFIER	MPN001	c.-24_-19delAAGCAAinsTAGCTG	intergenic
26	p2_2_S1	2	705	1.4545e-15	49	48	1	2.08333	T	C	missense_variant	MODERATE	MPN001	p.Ile5Thr	essential
27	p2_2_S1	2	708	0	50	49	1	2.04082	ATAA	GTAT	missense_variant	MODERATE	MPN001	p.AsnLys6SerMet	essential
28	p2_2_S1	2	716	0	50	49	1	2.04082	GAGTTGAACA	CAGTACAACT	stop_gained	HIGH	MPN001	p.GluLeuAsnLys9*	essential
29	p2_2_S1	2	747	3.83471e-15	61	60	1	1.66667	A	G	missense_variant	MODERATE	MPN001	p.Asn19Ser	essential
30	p2_2_S1	2	752	0	61	59	2	3.38983	A	G	missense_variant	MODERATE	MPN001	p.Ile21Val	essential
31	p2_2_S1	2	833	0	52	51	1	1.96078	A	T	missense_variant	MODERATE	MPN001	p.Asn48Tyr	essential
32	p2_2_S1	2	844	3.44295e-15	46	44	2	4.54545	C	T	synonymous_variant	LOW	MPN001	p.Tyr51Tyr	essential
33	p2_2_S1	2	887	1.71017e-15	47	46	1	2.17391	GAAGA	CAAGT	missense_variant	MODERATE	MPN001	p.GluGlu66GlnVal	essential
34	p2_2_S1	2	984	7.3231e-15	75	74	1	1.35135	T	C	missense_variant	MODERATE	MPN001	p.Leu98Pro	essential
35	p2_2_S1	2	1006	9.26894e-16	73	72	1	1.38889	AAA	TAT	missense_variant	MODERATE	MPN001	p.Asn106Ile	essential
36	p2_2_S1	2	1029	0	65	63	2	3.1746	ATAAG	TTAAC	missense_variant	MODERATE	MPN001	p.AspLys113ValAsn	essential
37	p2_2_S1	2	1045	2.8652e-16	64	63	1	1.5873	CAGA	TAGT	missense_variant	MODERATE	MPN001	p.Arg119Ser	essential
38	p2_2_S1	2	1061	0	62	61	1	1.63934	CAAAA	TATAT	missense_variant	MODERATE	MPN001	p.GlnAsn124TyrIle	essential
39	p2_2_S1	2	1066	9.82432e-15	58	57	1	1.75439	CGTT	TGTA	synonymous_variant	LOW	MPN001	p.127	essential
40	p2_2_S1	2	1117	3.4373e-17	48	47	1	2.12766	T	A	synonymous_variant	LOW	MPN001	p.Thr142Thr	essential
41	p2_2_S1	2	1296	0	58	56	2	3.57143	A	G	missense_variant	MODERATE	MPN001	p.Glu202Gly	essential
42	p2_2_S1	2	1316	0	55	53	2	3.77358	A	G	missense_variant	MODERATE	MPN001	p.Ile209Val	essential
43	p2_2_S1	2	1335	3.07403e-15	54	53	1	1.88679	A	G	missense_variant	MODERATE	MPN001	p.Glu215Gly	essential
44	p2_2_S1	2	1337	4.2041e-15	56	55	1	1.81818	G	A	missense_variant	MODERATE	MPN001	p.Gly216Ser	essential
45	p2_2_S1	2	1363	0	52	51	1	1.96078	CCGCAAAG	TCACTAAC	stop_gained	HIGH	MPN001	p.ArgLysGlu225*	essential
46	p2_2_S1	2	1479	0	62	61	1	1.63934	T	C	missense_variant	MODERATE	MPN001	p.Phe263Ser	essential
47	p2_2_S1	2	1542	7.53852e-16	64	63	1	1.5873	TGAC	AGAT	stop_gained	HIGH	MPN001	p.LeuThr284*	essential
48	p2_2_S1	2	1610	2.27521e-15	69	68	1	1.47059	A	G	missense_variant	MODERATE	MPN001	p.Asn307Asp	essential
49	p2_2_S1	2	1624	0	71	70	1	1.42857	A	G	synonymous_variant	LOW	MPN001	p.Gln311Gln	essential
50	p2_2_S1	2	1625	0	76	75	1	1.33333	A	G	missense_variant	MODERATE	MPN001	p.Asn312Asp	essential
51	p2_2_S1	2	1648	0	75	73	2	2.73973	A	G	synonymous_variant	LOW	MPN001	p.Glu319Glu	essential
52	p2_2_S1	2	1727	6.16289e-15	80	78	2	2.5641	TTTGA	CTTGG	missense_variant	MODERATE	MPN001	p.PheAsp346LeuGly	essential
53	p2_2_S1	2	1825	0	55	54	1	1.85185	T	A	synonymous_variant	LOW	MPN001	p.Pro378Pro	essential
54	p2_2_S1	2	1837	2.1848e-15	56	55	1	1.81818	A	G	upstream_gene_variant	MODIFIER	MPN002	c.-1A>G	intergenic
55	p2_2_S1	2	1890	0	62	59	3	5.08475	TCAAA	TGAAG	missense_variant	MODERATE	MPN002	p.Ile18Met	gene
56	p2_2_S1	2	1895	2.16244e-15	65	63	2	3.1746	ACA	GCC	missense_variant	MODERATE	MPN002	p.Thr20Ala	gene
57	p2_2_S1	2	1918	0	62	61	1	1.63934	ACGT	TCGC	missense_variant	MODERATE	MPN002	p.Lys27Asn	gene
58	p2_2_S1	2	1937	1.51453e-15	71	70	1	1.42857	AATA	TATT	stop_gained	HIGH	MPN002	p.AsnLys34*	gene
59	p2_2_S1	2	1948	0	73	72	1	1.38889	G	A	synonymous_variant	LOW	MPN002	p.Gly37Gly	gene
60	p2_2_S1	2	1961	2.99869e-15	73	71	2	2.8169	G	A	missense_variant	MODERATE	MPN002	p.Val42Ile	gene
61	p2_2_S1	2	2061	0	68	67	1	1.49254	G	A	missense_variant	MODERATE	MPN002	p.Arg75His	gene
62	p2_2_S1	2	2085	2.57703e-15	68	67	1	1.49254	ACGA	TCGT	missense_variant	MODERATE	MPN002	p.HisGlu83LeuVal	gene
63	p2_2_S1	2	2205	0	74	73	1	1.36986	ATGTA	TTGTG	missense_variant	MODERATE	MPN002	p.Asp123Val	gene
64	p2_2_S1	2	2230	7.3231e-15	75	74	1	1.35135	T	C	synonymous_variant	LOW	MPN002	p.Leu131Leu	gene
65	p2_2_S1	2	2269	0	58	57	1	1.75439	A	G	synonymous_variant	LOW	MPN002	p.Thr144Thr	gene
66	p2_2_S1	2	2287	0	52	51	1	1.96078	GATC	AATT	synonymous_variant	LOW	MPN002	p.152	gene
67	p2_2_S1	2	2342	8.63092e-16	85	84	1	1.19048	T	C	missense_variant	MODERATE	MPN002	p.Tyr169His	gene
68	p2_2_S1	2	2383	0	75	74	1	1.35135	C	T	synonymous_variant	LOW	MPN002	p.Asn182Asn	gene
69	p2_2_S1	2	2434	0	62	60	2	3.33333	G	A	synonymous_variant	LOW	MPN002	p.Val199Val	gene
70	p2_2_S1	2	2460	0	61	59	2	3.38983	TCATT	CCACT	missense_variant	MODERATE	MPN002	p.ValIle208AlaThr	gene
71	p2_2_S1	2	2465	0	61	59	2	3.38983	T	C	missense_variant	MODERATE	MPN002	p.Ser210Pro	gene
72	p2_2_S1	2	2471	0	66	65	1	1.53846	AACT	GACA	missense_variant	MODERATE	MPN002	p.AsnTyr212AspAsn	gene
73	p2_2_S1	2	2487	0	64	63	1	1.5873	T	A	missense_variant	MODERATE	MPN002	p.Met217Lys	gene
74	p2_2_S1	2	2512	0	60	59	1	1.69492	TTCC	CTCG	synonymous_variant	LOW	MPN002	p.227	gene
75	p2_2_S1	2	2522	3.39798e-15	54	53	1	1.88679	CTTCT	TTTCA	missense_variant	MODERATE	MPN002	p.LeuLeu229PheHis	gene
76	p2_2_S1	2	2537	3.76714e-15	48	47	1	2.12766	AAAAACG	TAAATCA	stop_gained	HIGH	MPN002	p.LysAsnGly234*	gene
77	p2_2_S1	2	2563	3.07403e-15	54	53	1	1.88679	T	A	missense_variant	MODERATE	MPN002	p.Phe242Leu	gene
78	p2_2_S1	2	2564	1.47663e-15	56	54	2	3.7037	G	T	missense_variant	MODERATE	MPN002	p.Gly243Cys	gene
79	p2_2_S1	2	2577	3.42082e-15	58	57	1	1.75439	GGG	AGA	missense_variant	MODERATE	MPN002	p.ArgAla247GlnThr	gene
80	p2_2_S1	2	2584	7.76453e-16	55	54	1	1.85185	G	T	missense_variant	MODERATE	MPN002	p.Leu249Phe	gene
81	p2_2_S1	2	2605	4.14595e-16	60	59	1	1.69492	T	A	synonymous_variant	LOW	MPN002	p.Ile256Ile	gene
82	p2_2_S1	2	2611	1.44296e-15	58	57	1	1.75439	AATGCG	TATACA	missense_variant	MODERATE	MPN002	p.MetArg259IleGln	gene
83	p2_2_S1	2	2636	0	57	56	1	1.78571	A	T	stop_gained	HIGH	MPN002	p.Lys267*	gene
84	p2_2_S1	2	2657	0	61	60	1	1.66667	AGT	TGA	missense_variant	MODERATE	MPN002	p.Ser274Trp	gene
85	p2_2_S1	2	2668	0	63	62	1	1.6129	ACAGGA	TCAGAT	missense_variant	MODERATE	MPN002	p.GluGlnAsp277AspGlnIle	gene
86	p2_2_S1	2	2687	0	64	63	1	1.5873	T	A	missense_variant	MODERATE	MPN002	p.Trp284Arg	gene
87	p2_2_S1	2	2854	1.89876e-15	74	73	1	1.36986	A	G	upstream_gene_variant	MODIFIER	MPN003	c.-15A>G	intergenic
88	p2_2_S1	2	2859	0	66	65	1	1.53846	AGACA	TGACT	upstream_gene_variant	MODIFIER	MPN003	c.-10_-6delAGACAinsTGACT	intergenic
89	p2_2_S1	2	2919	3.1642e-16	57	56	1	1.78571	TCT	ACA	missense_variant	MODERATE	MPN003	p.Leu18His	gene
90	p2_2_S1	2	2927	0	66	65	1	1.53846	GCT	ACA	missense_variant	MODERATE	MPN003	p.GlyLeu20AspIle	gene
91	p2_2_S1	2	2952	0	69	68	1	1.47059	CGGC	TGGT	synonymous_variant	LOW	MPN003	p.30	gene
92	p2_2_S1	2	2956	0	72	70	2	2.85714	A	T	missense_variant	MODERATE	MPN003	p.Met30Leu	gene
93	p2_2_S1	2	2982	1.20541e-16	75	74	1	1.35135	AGGGT	GGGGC	synonymous_variant	LOW	MPN003	p.41	gene
94	p2_2_S1	2	3019	0	81	80	1	1.25	TCAAT	ACAAC	missense_variant	MODERATE	MPN003	p.SerIle51ThrThr	gene
95	p2_2_S1	2	3025	4.43011e-15	81	79	2	2.53165	G	A	missense_variant	MODERATE	MPN003	p.Asp53Asn	gene
96	p2_2_S1	2	3033	1.32995e-15	76	75	1	1.33333	CATGGGTGG	TATCTATGC	missense_variant	MODERATE	MPN003	p.MetGlyGly56IleTyrAla	gene
97	p2_2_S1	2	3048	1.27345e-15	74	73	1	1.36986	GAGT	AAGC	synonymous_variant	LOW	MPN003	p.62	gene
98	p2_2_S1	2	3082	0	68	67	1	1.49254	G	A	missense_variant	MODERATE	MPN003	p.Val72Ile	gene
99	p2_2_S1	2	3104	0	67	64	3	4.6875	GCCGGGGCAT	TCTCGTGCAT	missense_variant	MODERATE	MPN003	p.GlyArgGly79ValSerCys	gene
100	p2_2_S1	2	3120	3.88768e-15	74	73	1	1.36986	T	A	synonymous_variant	LOW	MPN003	p.Val84Val	gene
101	p2_2_S1	2	3161	0	77	76	1	1.31579	T	C	missense_variant	MODERATE	MPN003	p.Val98Ala	gene
102	p2_2_S1	2	3212	0	85	84	1	1.19048	T	C	missense_variant	MODERATE	MPN003	p.Val115Ala	gene
103	p2_2_S1	2	3216	0	90	89	1	1.1236	A	T	synonymous_variant	LOW	MPN003	p.Ser116Ser	gene
104	p2_2_S1	2	3245	0	96	95	1	1.05263	T	C	missense_variant	MODERATE	MPN003	p.Val126Ala	gene
105	p2_2_S1	2	3255	0	100	98	2	2.04082	TTTAAGT	GTTAGGA	missense_variant	MODERATE	MPN003	p.Ser131Gly	gene
106	p2_2_S1	2	3268	0	108	107	1	0.934579	TTT	ATA	missense_variant	MODERATE	MPN003	p.Phe134Ile	gene
107	p2_2_S1	2	3271	1.45803e-15	101	100	1	1	A	G	missense_variant	MODERATE	MPN003	p.Lys135Glu	gene
108	p2_2_S1	2	3303	1.67251e-15	105	104	1	0.961538	C	A	stop_gained	HIGH	MPN003	p.Tyr145*	gene
109	p2_2_S1	2	3305	5.96725e-15	101	99	2	2.0202	T	A	missense_variant	MODERATE	MPN003	p.Phe146Tyr	gene
110	p2_2_S1	2	3317	0	98	97	1	1.03093	A	C	missense_variant	MODERATE	MPN003	p.His150Pro	gene
111	p2_2_S1	2	3328	0	98	97	1	1.03093	GAA	CAG	missense_variant	MODERATE	MPN003	p.Glu154Gln	gene
112	p2_2_S1	2	3411	7.64682e-16	82	81	1	1.23457	GAT	AAA	missense_variant	MODERATE	MPN003	p.Met182Lys	gene
113	p2_2_S1	2	3470	0	67	66	1	1.51515	T	C	missense_variant	MODERATE	MPN003	p.Phe201Ser	gene
114	p2_2_S1	2	3595	2.98009e-15	85	84	1	1.19048	TTATT	ATATA	missense_variant	MODERATE	MPN003	p.LeuPhe243IleTyr	gene
115	p2_2_S1	2	3614	2.64484e-15	81	80	1	1.25	T	C	missense_variant	MODERATE	MPN003	p.Phe249Ser	gene
116	p2_2_S1	2	3640	1.60494e-15	92	91	1	1.0989	T	A	missense_variant	MODERATE	MPN003	p.Ser258Thr	gene
117	p2_2_S1	2	3662	0	86	85	1	1.17647	A	T	missense_variant	MODERATE	MPN003	p.Tyr265Phe	gene
118	p2_2_S1	2	3737	3.82741e-15	61	60	1	1.66667	T	C	missense_variant	MODERATE	MPN003	p.Ile290Thr	gene
119	p2_2_S1	2	3750	0	63	61	2	3.27869	A	G	synonymous_variant	LOW	MPN003	p.Glu294Glu	gene
120	p2_2_S1	2	3799	2.18857e-15	56	55	1	1.81818	A	G	missense_variant	MODERATE	MPN003	p.Asn311Asp	gene
121	p2_2_S1	2	3823	0	56	54	2	3.7037	TTCTTA	TACATG	missense_variant	MODERATE	MPN003	p.PheLeu319TyrMet	gene
122	p2_2_S1	2	3831	4.14595e-16	60	59	1	1.69492	G	A	synonymous_variant	LOW	MPN003	p.Lys321Lys	gene
123	p2_2_S1	2	3957	5.68049e-15	70	69	1	1.44928	T	C	synonymous_variant	LOW	MPN003	p.Arg363Arg	gene
124	p2_2_S1	2	4026	2.26038e-15	69	68	1	1.47059	C	T	synonymous_variant	LOW	MPN003	p.Asn386Asn	gene
125	p2_2_S1	2	4163	0	71	70	1	1.42857	CCTCAA	TCACAG	missense_variant	MODERATE	MPN003	p.ProSerIle432LeuThrVal	gene
126	p2_2_S1	2	4174	0	73	72	1	1.38889	G	A	missense_variant	MODERATE	MPN003	p.Glu436Lys	gene
127	p2_2_S1	2	4184	0	65	63	2	3.1746	TTGTC	ATGTT	missense_variant	MODERATE	MPN003	p.Ile439Asn	gene
128	p2_2_S1	2	4228	1.50676e-17	57	56	1	1.78571	GACC	AACT	missense_variant	MODERATE	MPN003	p.AspArg454AsnCys	gene
129	p2_2_S1	2	4344	0	63	61	2	3.27869	C	T	synonymous_variant	LOW	MPN003	p.Gly492Gly	gene
130	p2_2_S1	2	4401	6.33311e-16	64	63	1	1.5873	C	T	synonymous_variant	LOW	MPN003	p.Ile511Ile	gene
131	p2_2_S1	2	4445	1.43543e-15	58	57	1	1.75439	TTT	ATC	missense_variant	MODERATE	MPN003	p.Leu526His	gene
132	p2_2_S1	2	4477	3.82741e-15	61	60	1	1.66667	T	C	synonymous_variant	LOW	MPN003	p.Leu537Leu	gene
133	p2_2_S1	2	4508	7.83751e-16	55	54	1	1.85185	A	G	missense_variant	MODERATE	MPN003	p.Gln547Arg	gene
134	p2_2_S1	2	4532	2.20034e-15	56	55	1	1.81818	A	T	missense_variant	MODERATE	MPN003	p.Tyr555Phe	gene
135	p2_2_S1	2	4534	1.52206e-15	59	57	2	3.50877	T	C	missense_variant	MODERATE	MPN003	p.Ser556Pro	gene
136	p2_2_S1	2	4537	0	61	59	2	3.38983	AATAAG	TATTAA	stop_gained	HIGH	MPN003	p.AsnLys557*	gene
137	p2_2_S1	2	4545	3.54089e-15	79	78	1	1.28205	C	G	missense_variant	MODERATE	MPN003	p.Asp559Glu	gene
138	p2_2_S1	2	4546	4.21917e-15	73	72	1	1.38889	TTATA	CTATT	missense_variant	MODERATE	MPN003	p.Tyr561Phe	gene
139	p2_2_S1	2	4582	3.14207e-15	64	62	2	3.22581	A	G	missense_variant	MODERATE	MPN003	p.Lys572Glu	gene
140	p2_2_S1	2	4587	2.93089e-15	63	62	1	1.6129	A	G	synonymous_variant	LOW	MPN003	p.Gln573Gln	gene
141	p2_2_S1	2	4729	3.14207e-15	42	41	1	2.43902	AAA	TAT	missense_variant	MODERATE	MPN003	p.Lys621Tyr	gene
142	p2_2_S1	2	4784	0	48	45	3	6.66667	AACAA	TACAT	missense_variant	MODERATE	MPN003	p.GluGln639ValHis	gene
143	p2_2_S1	2	4862	3.35302e-15	65	64	1	1.5625	ATT	GTA	stop_gained	HIGH	MPN004	p.Leu15*	gene
144	p2_2_S1	2	5074	2.0492e-15	65	64	1	1.5625	T	A	missense_variant	MODERATE	MPN004	p.Val85Glu	gene
145	p2_2_S1	2	5079	0	60	59	1	1.69492	AGTAA	TGTAT	missense_variant	MODERATE	MPN004	p.SerLys87CysMet	gene
146	p2_2_S1	2	5127	2.12854e-15	70	68	2	2.94118	CGGAT	TGAAT	missense_variant	MODERATE	MPN004	p.Arg103Trp	gene
147	p2_2_S1	2	5138	3.52982e-15	79	78	1	1.28205	G	A	synonymous_variant	LOW	MPN004	p.Gln106Gln	gene
148	p2_2_S1	2	5143	0	67	64	3	4.6875	TTTCT	ATACC	missense_variant	MODERATE	MPN004	p.PheSer108TyrThr	gene
149	p2_2_S1	2	5174	3.68403e-15	70	69	1	1.44928	T	C	synonymous_variant	LOW	MPN004	p.His118His	gene
150	p2_2_S1	2	5177	0	71	70	1	1.42857	T	A	synonymous_variant	LOW	MPN004	p.Gly119Gly	gene
151	p2_2_S1	2	5208	0	68	67	1	1.49254	G	A	missense_variant	MODERATE	MPN004	p.Ala130Thr	gene
152	p2_2_S1	2	5216	0	70	69	1	1.44928	ACGTTAT	GCGATAC	synonymous_variant	LOW	MPN004	p.135	gene
153	p2_2_S1	2	5238	0	63	62	1	1.6129	T	A	missense_variant	MODERATE	MPN004	p.Ser140Thr	gene
154	p2_2_S1	2	5249	3.23954e-15	66	64	2	3.125	GGGGG	GAGGA	missense_variant	MODERATE	MPN004	p.GlyGlu144ArgLys	gene
155	p2_2_S1	2	5274	1.90605e-15	74	73	1	1.36986	A	T	stop_gained	HIGH	MPN004	p.Lys152*	gene
156	p2_2_S1	2	5309	0	84	83	1	1.20482	GGA	TGT	missense_variant	MODERATE	MPN004	p.Glu164Val	gene
157	p2_2_S1	2	5315	5.349e-16	80	77	3	3.8961	ACAAGAA	GCTAGTA	missense_variant	MODERATE	MPN004	p.GlnGlu166LeuVal	gene
158	p2_2_S1	2	5348	0	80	79	1	1.26582	T	C	synonymous_variant	LOW	MPN004	p.Pro176Pro	gene
159	p2_2_S1	2	5359	1.14669e-14	80	78	2	2.5641	C	T	missense_variant	MODERATE	MPN004	p.Ala180Val	gene
160	p2_2_S1	2	5367	0	75	74	1	1.35135	TCGAG	CCGAC	missense_variant	MODERATE	MPN004	p.SerSer183ProThr	gene
161	p2_2_S1	2	5380	6.23069e-15	80	78	2	2.5641	C	T	missense_variant	MODERATE	MPN004	p.Ala187Val	gene
162	p2_2_S1	2	5432	1.06627e-15	64	63	1	1.5873	GGG	AGA	missense_variant	MODERATE	MPN004	p.Gly205Asp	gene
163	p2_2_S1	2	5444	5.68049e-15	70	69	1	1.44928	T	C	synonymous_variant	LOW	MPN004	p.Leu208Leu	gene
164	p2_2_S1	2	5490	1.22848e-15	77	75	2	2.66667	A	C	missense_variant	MODERATE	MPN004	p.Ile224Leu	gene
165	p2_2_S1	2	5530	7.30756e-15	75	74	1	1.35135	A	T	missense_variant	MODERATE	MPN004	p.Tyr237Phe	gene
166	p2_2_S1	2	5539	0	70	68	2	2.94118	G	A	missense_variant	MODERATE	MPN004	p.Gly240Glu	gene
167	p2_2_S1	2	5554	3.17173e-15	80	77	3	3.8961	TTGAA	ATGAG	missense_variant	MODERATE	MPN004	p.Phe245Tyr	gene
168	p2_2_S1	2	5561	2.117e-15	78	77	1	1.2987	T	G	synonymous_variant	LOW	MPN004	p.Thr247Thr	gene
169	p2_2_S1	2	5568	6.7955e-15	101	99	2	2.0202	GGT	AGA	missense_variant	MODERATE	MPN004	p.Gly250Arg	gene
170	p2_2_S1	2	5577	1.0625e-15	86	84	2	2.38095	G	T	missense_variant	MODERATE	MPN004	p.Val253Phe	gene
171	p2_2_S1	2	5604	3.58633e-15	92	91	1	1.0989	C	T	stop_gained	HIGH	MPN004	p.Gln262*	gene
172	p2_2_S1	2	5635	0	84	82	2	2.43902	C	G	missense_variant	MODERATE	MPN004	p.Thr272Arg	gene
173	p2_2_S1	2	5680	3.90275e-15	74	73	1	1.36986	T	C	missense_variant	MODERATE	MPN004	p.Ile287Thr	gene
174	p2_2_S1	2	5709	0	82	81	1	1.23457	A	C	missense_variant	MODERATE	MPN004	p.Thr297Pro	gene
175	p2_2_S1	2	5729	0	79	78	1	1.28205	TGATG	AGAAA	missense_variant	MODERATE	MPN004	p.AspGlu304GluLys	gene
176	p2_2_S1	2	5750	4.49039e-15	87	85	2	2.35294	A	G	synonymous_variant	LOW	MPN004	p.Gly310Gly	gene
177	p2_2_S1	2	5751	7.15712e-15	82	81	1	1.23457	ATTCG	GTTCA	missense_variant	MODERATE	MPN004	p.IleArg311ValHis	gene
178	p2_2_S1	2	5757	5.53005e-15	79	78	1	1.28205	T	C	synonymous_variant	LOW	MPN004	p.Leu313Leu	gene
179	p2_2_S1	2	5764	0	77	76	1	1.31579	TTGAA	CTGAG	missense_variant	MODERATE	MPN004	p.Ile315Thr	gene
180	p2_2_S1	2	5797	2.23001e-15	69	66	3	4.54545	TAT	CAC	missense_variant	MODERATE	MPN004	p.Leu326Ser	gene
181	p2_2_S1	2	5843	4.2267e-15	50	49	1	2.04082	CGTGA	TGTGT	missense_variant	MODERATE	MPN004	p.Asn343Tyr	gene
182	p2_2_S1	2	5894	7.76453e-16	55	54	1	1.85185	G	A	synonymous_variant	LOW	MPN004	p.Lys358Lys	gene
183	p2_2_S1	2	5910	4.14595e-16	55	54	1	1.85185	TACCTC	AAGCTG	missense_variant	MODERATE	MPN004	p.Tyr364Lys	gene
184	p2_2_S1	2	5921	0	60	59	1	1.69492	CC	TG	missense_variant	MODERATE	MPN004	p.Gln368Glu	gene
185	p2_2_S1	2	5927	0	58	57	1	1.75439	C	T	synonymous_variant	LOW	MPN004	p.Leu369Leu	gene
186	p2_2_S1	2	5939	0	59	58	1	1.72414	T	A	synonymous_variant	LOW	MPN004	p.Ile373Ile	gene
187	p2_2_S1	2	5946	1.16798e-15	62	61	1	1.63934	ACCC	TCCT	stop_gained	HIGH	MPN004	p.ThrGln376*	gene
188	p2_2_S1	2	6026	0	63	62	1	1.6129	GGTA	CGTT	missense_variant	MODERATE	MPN004	p.Glu402Asp	gene
189	p2_2_S1	2	6030	1.51453e-15	59	57	2	3.50877	A	G	missense_variant	MODERATE	MPN004	p.Ile404Val	gene
190	p2_2_S1	2	6043	3.72947e-15	58	57	1	1.75439	AAAAGTCC	TTATGTCT	missense_variant	MODERATE	MPN004	p.LysLys408IleMet	gene
191	p2_2_S1	2	6082	2.53936e-15	60	59	1	1.69492	ACGA	TCGT	missense_variant	MODERATE	MPN004	p.HisGlu421LeuVal	gene
192	p2_2_S1	2	6094	1.36079e-16	68	66	2	3.0303	GGTTA	AGTTT	missense_variant	MODERATE	MPN004	p.GlyLeu425GluPhe	gene
193	p2_2_S1	2	6115	0	73	72	1	1.38889	GGGCG	ACACA	missense_variant	MODERATE	MPN004	p.ArgAla432HisThr	gene
194	p2_2_S1	2	6259	2.5582e-15	51	50	1	2	A	G	missense_variant	MODERATE	MPN004	p.Glu480Gly	gene
195	p2_2_S1	2	6281	4.91228e-15	60	58	2	3.44828	A	G	synonymous_variant	LOW	MPN004	p.Glu487Glu	gene
196	p2_2_S1	2	6285	1.95102e-15	62	61	1	1.63934	TTT	CTC	missense_variant	MODERATE	MPN004	p.Phe489Leu	gene
197	p2_2_S1	2	6302	0	68	67	1	1.49254	TAGT	AAGA	missense_variant	MODERATE	MPN004	p.Ser495Arg	gene
198	p2_2_S1	2	6346	0	76	75	1	1.33333	A	G	missense_variant	MODERATE	MPN004	p.Asp509Gly	gene
199	p2_2_S1	2	6383	0	89	88	1	1.13636	C	T	synonymous_variant	LOW	MPN004	p.Ser521Ser	gene
200	p2_2_S1	2	6388	2.39975e-15	87	86	1	1.16279	ACG	TCA	missense_variant	MODERATE	MPN004	p.AsnGly523IleSer	gene
201	p2_2_S1	2	6402	0	81	80	1	1.25	C	T	missense_variant	MODERATE	MPN004	p.Arg528Trp	gene
202	p2_2_S1	2	6437	1.61247e-15	92	91	1	1.0989	T	A	synonymous_variant	LOW	MPN004	p.Arg539Arg	gene
203	p2_2_S1	2	6438	7.01421e-15	93	92	1	1.08696	G	A	missense_variant	MODERATE	MPN004	p.Gly540Ser	gene
204	p2_2_S1	2	6462	7.353e-15	91	88	3	3.40909	ACTACCTA	GCTTCCTA	missense_variant	MODERATE	MPN004	p.ThrThr548AlaSer	gene
205	p2_2_S1	2	6486	1.81047e-16	91	90	1	1.11111	A	T	missense_variant	MODERATE	MPN004	p.Ser556Cys	gene
206	p2_2_S1	2	6552	0	71	69	2	2.89855	CGCATCC	CACTTCT	missense_variant	MODERATE	MPN004	p.ArgIleArg578HisPheTrp	gene
207	p2_2_S1	2	6564	2.16621e-15	72	71	1	1.40845	CACCA	TTCCT	missense_variant	MODERATE	MPN004	p.HisGln582PheLeu	gene
208	p2_2_S1	2	6577	5.68049e-15	70	69	1	1.44928	C	T	missense_variant	MODERATE	MPN004	p.Pro586Leu	gene
209	p2_2_S1	2	6578	4.27967e-15	73	72	1	1.38889	GGGT	CGGA	synonymous_variant	LOW	MPN004	p.588	gene
210	p2_2_S1	2	6598	5.27367e-16	67	66	1	1.51515	GGAT	AGAA	missense_variant	MODERATE	MPN004	p.GlyIle593GluAsn	gene
211	p2_2_S1	2	6610	0	71	70	1	1.42857	TT	AC	missense_variant	MODERATE	MPN004	p.Val597Asp	gene
212	p2_2_S1	2	6619	0	68	67	1	1.49254	T	C	missense_variant	MODERATE	MPN004	p.Ile600Thr	gene
213	p2_2_S1	2	6712	4.04566e-15	65	64	1	1.5625	T	C	missense_variant	MODERATE	MPN004	p.Ile631Thr	gene
214	p2_2_S1	2	6762	0	54	52	2	3.84615	C	T	missense_variant	MODERATE	MPN004	p.Arg648Cys	gene
215	p2_2_S1	2	6791	1.29605e-15	58	57	1	1.75439	T	G	synonymous_variant	LOW	MPN004	p.Val657Val	gene
216	p2_2_S1	2	6848	3.72947e-15	58	57	1	1.75439	GGG	AGA	missense_variant	MODERATE	MPN004	p.Gly677Glu	gene
217	p2_2_S1	2	6858	0	61	59	2	3.38983	G	T	missense_variant	MODERATE	MPN004	p.Val680Leu	gene
218	p2_2_S1	2	6940	0	46	45	1	2.22222	T	C	missense_variant	MODERATE	MPN004	p.Phe707Ser	gene
219	p2_2_S1	2	6980	7.45871e-15	66	65	1	1.53846	A	T	missense_variant	MODERATE	MPN004	p.Leu720Phe	gene
220	p2_2_S1	2	7007	0	59	58	1	1.72414	T	A	synonymous_variant	LOW	MPN004	p.Gly729Gly	gene
221	p2_2_S1	2	7027	1.16421e-15	67	66	1	1.51515	A	T	missense_variant	MODERATE	MPN004	p.Lys736Ile	gene
222	p2_2_S1	2	7054	0	71	69	2	2.89855	A	G	missense_variant	MODERATE	MPN004	p.Lys745Arg	gene
223	p2_2_S1	2	7087	2.93089e-15	63	62	1	1.6129	C	G	missense_variant	MODERATE	MPN004	p.Thr756Ser	gene
224	p2_2_S1	2	7114	0	70	69	1	1.44928	TCTTTG	ACTTAA	missense_variant	MODERATE	MPN004	p.ValPheGly765AspLeuSer	gene
225	p2_2_S1	2	7137	1.30335e-15	58	57	1	1.75439	A	G	missense_variant	MODERATE	MPN004	p.Met773Val	gene
226	p2_2_S1	2	7239	0	61	60	1	1.66667	GAACG	AAACA	missense_variant	MODERATE	MPN004	p.GluArg807LysHis	gene
227	p2_2_S1	2	7274	0	59	58	1	1.72414	A	T	missense_variant	MODERATE	MPN004	p.Glu818Asp	gene
228	p2_2_S1	2	7282	0	66	65	1	1.53846	TTAAA	CTAAG	missense_variant	MODERATE	MPN004	p.Ile821Thr	gene
229	p2_2_S1	2	7290	0	76	75	1	1.33333	A	C	missense_variant	MODERATE	MPN004	p.Thr824Pro	gene
230	p2_2_S1	2	7315	7.01421e-15	93	92	1	1.08696	T	A	missense_variant	MODERATE	MPN004	p.Val832Asp	gene
231	p2_2_S1	2	7358	0	77	76	1	1.31579	AGAAGTTA	GGAGGTTG	missense_variant	MODERATE	MPN005	p.LysLys16ArgArg	essential
232	p2_2_S1	2	7379	2.0944e-15	87	86	1	1.16279	TAAGT	CAAGG	missense_variant	MODERATE	MPN005	p.ValSer23AlaArg	essential
233	p2_2_S1	2	7412	0	77	76	1	1.31579	C	A	missense_variant	MODERATE	MPN005	p.Ala34Asp	essential
234	p2_2_S1	2	7426	0	80	79	1	1.26582	CGC	TGT	missense_variant	MODERATE	MPN005	p.Arg39Cys	essential
235	p2_2_S1	2	7444	0	79	78	1	1.28205	ATT	GTA	missense_variant	MODERATE	MPN005	p.Ile45Val	essential
236	p2_2_S1	2	7480	0	77	76	1	1.31579	C	T	stop_gained	HIGH	MPN005	p.Gln57*	essential
237	p2_2_S1	2	7511	5.66542e-15	79	78	1	1.28205	AGTTA	TGTTG	missense_variant	MODERATE	MPN005	p.Lys67Met	essential
238	p2_2_S1	2	7524	0	84	83	1	1.20482	ATCC	TTCT	missense_variant	MODERATE	MPN005	p.Glu71Asp	essential
239	p2_2_S1	2	7535	0	81	80	1	1.25	T	C	missense_variant	MODERATE	MPN005	p.Leu75Ser	essential
240	p2_2_S1	2	7570	1.35255e-15	98	97	1	1.03093	AAG	TAC	missense_variant	MODERATE	MPN005	p.Lys87Tyr	essential
241	p2_2_S1	2	7582	7.00668e-15	93	92	1	1.08696	A	G	missense_variant	MODERATE	MPN005	p.Thr91Ala	essential
242	p2_2_S1	2	7615	0	94	93	1	1.07527	AACAT	TACAC	missense_variant	MODERATE	MPN005	p.AsnIle102TyrThr	essential
243	p2_2_S1	2	7625	3.50322e-15	88	87	1	1.14943	ATG	TTA	missense_variant	MODERATE	MPN005	p.AspGlu105ValLys	essential
244	p2_2_S1	2	7655	3.23954e-15	97	96	1	1.04167	C	G	missense_variant	MODERATE	MPN005	p.Thr115Ser	essential
245	p2_2_S1	2	7685	0	85	84	1	1.19048	G	A	missense_variant	MODERATE	MPN005	p.Arg125His	essential
246	p2_2_S1	2	7691	0	80	79	1	1.26582	C	T	missense_variant	MODERATE	MPN005	p.Pro127Leu	essential
247	p2_2_S1	2	7720	2.64484e-15	81	80	1	1.25	T	C	missense_variant	MODERATE	MPN005	p.Trp137Arg	essential
248	p2_2_S1	2	7794	0	48	47	1	2.12766	T	C	synonymous_variant	LOW	MPN005	p.Ala161Ala	essential
249	p2_2_S1	2	7798	2.87062e-15	50	49	1	2.04082	AC	TT	missense_variant	MODERATE	MPN005	p.Thr163Phe	essential
250	p2_2_S1	2	7804	1.95879e-15	62	61	1	1.63934	AAA	TAT	missense_variant	MODERATE	MPN005	p.Lys165Tyr	essential
251	p2_2_S1	2	7856	0	66	64	2	3.125	A	C	missense_variant	MODERATE	MPN005	p.Lys182Thr	essential
252	p2_2_S1	2	7867	0	69	67	2	2.98507	CAG	CG	frameshift_variant	HIGH	MPN005	p.Gln186fs	essential
253	p2_2_S1	2	7966	0	62	60	2	3.33333	C	T	missense_variant	MODERATE	MPN005	p.Arg219Cys	essential
254	p2_2_S1	2	7993	1.20564e-15	74	72	2	2.77778	G	A	missense_variant	MODERATE	MPN005	p.Val228Met	essential
255	p2_2_S1	2	8017	3.13406e-15	76	75	1	1.33333	AACGA	TACGT	missense_variant	MODERATE	MPN005	p.AsnGlu236TyrVal	essential
256	p2_2_S1	2	8024	3.81399e-17	75	74	1	1.35135	TCTTCACGG	ACTACACAA	missense_variant	MODERATE	MPN005	p.IlePheThrGlu238AsnTyrThrLys	essential
257	p2_2_S1	2	8043	1.28075e-16	73	72	1	1.38889	CCCCAA	TCTCTT	missense_variant	MODERATE	MPN005	p.ProLys245LeuLeu	essential
258	p2_2_S1	2	8059	0	71	70	1	1.42857	G	A	missense_variant	MODERATE	MPN005	p.Ala250Thr	essential
259	p2_2_S1	2	8080	5.68049e-15	70	69	1	1.44928	C	A	missense_variant	MODERATE	MPN005	p.Gln257Lys	essential
260	p2_2_S1	2	8139	3.1642e-16	57	56	1	1.78571	AAA	TAT	missense_variant	MODERATE	MPN005	p.GlnLys276HisMet	essential
261	p2_2_S1	2	8175	0	62	61	1	1.63934	A	T	missense_variant	MODERATE	MPN005	p.Glu288Asp	essential
262	p2_2_S1	2	8204	1.89876e-15	71	70	1	1.42857	GGGAC	AGGAT	missense_variant	MODERATE	MPN005	p.Arg298Gln	essential
263	p2_2_S1	2	8215	2.79528e-15	72	71	1	1.40845	C	T	stop_gained	HIGH	MPN005	p.Gln302*	essential
264	p2_2_S1	2	8222	0	66	65	1	1.53846	TGTTAGA	CGCTAGT	missense_variant	MODERATE	MPN005	p.LeuLeuGlu304SerLeuVal	essential
265	p2_2_S1	2	8236	0	70	69	1	1.44928	ATTCC	GTTCA	missense_variant	MODERATE	MPN005	p.IlePro309ValHis	essential
266	p2_2_S1	2	8250	0	77	76	1	1.31579	TTTGT	ATTGA	missense_variant	MODERATE	MPN005	p.Leu315Ile	essential
267	p2_2_S1	2	8265	0	62	61	1	1.63934	CGGTGAC	TGGTAAG	missense_variant	MODERATE	MPN005	p.Asp320Lys	essential
268	p2_2_S1	2	8442	5.68049e-15	70	69	1	1.44928	C	T	synonymous_variant	LOW	MPN005	p.Asn377Asn	essential
269	p2_2_S1	2	8499	0	76	74	2	2.7027	G	A	synonymous_variant	LOW	MPN005	p.Thr396Thr	essential
270	p2_2_S1	2	8505	0	77	75	2	2.66667	A	G	synonymous_variant	LOW	MPN005	p.Ala398Ala	essential
271	p2_2_S1	2	8573	0	61	60	1	1.66667	AAA	GAT	upstream_gene_variant	MODIFIER	MPN006	c.-6_-4delAAAinsGAT	intergenic
272	p2_2_S1	2	8628	0	50	48	2	4.16667	AAA	GAG	missense_variant	MODERATE	MPN006	p.LysThr17ArgAla	gene
273	p2_2_S1	2	8641	0	53	51	2	3.92157	A	G	synonymous_variant	LOW	MPN006	p.Leu21Leu	gene
274	p2_2_S1	2	8674	2.20034e-15	51	50	1	2	TTTGGG	ATTGAA	missense_variant	MODERATE	MPN006	p.PheLeuGly32LeuLeuAsn	gene
275	p2_2_S1	2	8684	1.30335e-15	58	57	1	1.75439	A	T	stop_gained	HIGH	MPN006	p.Lys36*	gene
276	p2_2_S1	2	8701	1.60494e-15	49	48	1	2.08333	GGAACCCGGGGG	AGAAGTCGAGGA	missense_variant	MODERATE	MPN006	p.ProGlyGly43ValGluAsp	gene
277	p2_2_S1	2	8746	0	63	62	1	1.6129	CCTGC	TATGT	missense_variant	MODERATE	MPN006	p.LeuHis57MetTyr	gene
278	p2_2_S1	2	8791	0	58	56	2	3.57143	G	T	synonymous_variant	LOW	MPN006	p.Ala71Ala	gene
279	p2_2_S1	2	8802	0	61	60	1	1.66667	C	G	missense_variant	MODERATE	MPN006	p.Thr75Ser	gene
280	p2_2_S1	2	8832	9.41961e-16	63	62	1	1.6129	CGTT	TGTA	stop_gained	HIGH	MPN006	p.AlaLeu85*	gene
281	p2_2_S1	2	8850	0	71	70	1	1.42857	T	A	stop_gained	HIGH	MPN006	p.Leu91*	gene
282	p2_2_S1	2	8878	1.16421e-15	67	66	1	1.51515	T	A	synonymous_variant	LOW	MPN006	p.Ser100Ser	gene
283	p2_2_S1	2	8898	0	61	60	1	1.66667	TAATT	AAATA	stop_gained	HIGH	MPN006	p.Leu107*	gene
284	p2_2_S1	2	8907	7.24752e-15	62	61	1	1.63934	A	T	missense_variant	MODERATE	MPN006	p.Lys110Ile	gene
285	p2_2_S1	2	8930	0	68	67	1	1.49254	A	T	stop_gained	HIGH	MPN006	p.Lys118*	gene
286	p2_2_S1	2	8956	0	89	88	1	1.13636	T	A	missense_variant	MODERATE	MPN006	p.Asp126Glu	gene
287	p2_2_S1	2	8973	7.16442e-15	84	83	1	1.20482	C	T	missense_variant	MODERATE	MPN006	p.Thr132Ile	gene
288	p2_2_S1	2	8976	1.36385e-15	80	79	1	1.26582	TTATTGTT	ATATAGTA	missense_variant	MODERATE	MPN006	p.Phe133Tyr	gene
289	p2_2_S1	2	9005	1.23201e-15	80	79	1	1.26582	T	C	synonymous_variant	LOW	MPN006	p.Leu143Leu	gene
290	p2_2_S1	2	9036	1.02507e-15	76	75	1	1.33333	A	G	missense_variant	MODERATE	MPN006	p.Asn153Ser	gene
291	p2_2_S1	2	9048	0	87	86	1	1.16279	A	G	missense_variant	MODERATE	MPN006	p.Asn157Ser	gene
292	p2_2_S1	2	9055	2.02306e-15	74	73	1	1.36986	TAAAAA	CGAAAG	missense_variant	MODERATE	MPN006	p.LysLys160GluArg	gene
293	p2_2_S1	2	9073	2.49769e-15	90	89	1	1.1236	T	A	missense_variant	MODERATE	MPN006	p.Phe165Leu	gene
294	p2_2_S1	2	9123	4.63329e-15	78	76	2	2.63158	T	C	missense_variant	MODERATE	MPN006	p.Phe182Ser	gene
295	p2_2_S1	2	9152	0	76	75	1	1.33333	T	G	missense_variant	MODERATE	MPN006	p.Cys192Gly	gene
296	p2_2_S1	2	9175	3.93312e-15	68	67	1	1.49254	ATTA	GTTT	missense_variant	MODERATE	MPN006	p.Leu200Phe	gene
297	p2_2_S1	2	9218	3.0891e-15	54	53	1	1.88679	A	T	missense_variant	MODERATE	MPN007	p.Gln12Leu	gene
298	p2_2_S1	2	9245	4.14595e-16	60	59	1	1.69492	T	C	missense_variant	MODERATE	MPN007	p.Val21Ala	gene
299	p2_2_S1	2	9279	0	53	52	1	1.92308	A	G	synonymous_variant	LOW	MPN007	p.Glu32Glu	gene
300	p2_2_S1	2	9323	0	68	67	1	1.49254	T	A	missense_variant	MODERATE	MPN007	p.Leu47His	gene
301	p2_2_S1	2	9359	2.5469e-15	78	77	1	1.2987	AAG	TAC	missense_variant	MODERATE	MPN007	p.GlnAla59LeuPro	gene
302	p2_2_S1	2	9367	0	86	85	1	1.17647	C	T	missense_variant	MODERATE	MPN007	p.Pro62Ser	gene
303	p2_2_S1	2	9379	0	77	76	1	1.31579	G	A	missense_variant	MODERATE	MPN007	p.Glu66Lys	gene
304	p2_2_S1	2	9411	2.80281e-15	72	71	1	1.40845	C	G	missense_variant	MODERATE	MPN007	p.Asn76Lys	gene
305	p2_2_S1	2	9461	1.95102e-15	62	61	1	1.63934	AAA	GAT	missense_variant	MODERATE	MPN007	p.GluThr93GlySer	gene
306	p2_2_S1	2	9583	3.11947e-15	61	59	2	3.38983	G	A	missense_variant	MODERATE	MPN007	p.Val134Ile	gene
307	p2_2_S1	2	9584	4.92735e-15	60	58	2	3.44828	T	C	missense_variant	MODERATE	MPN007	p.Val134Ala	gene
308	p2_2_S1	2	9676	0	46	45	1	2.22222	GAA	CAG	missense_variant	MODERATE	MPN007	p.Glu165Gln	gene
309	p2_2_S1	2	9706	0	64	63	1	1.5873	T	A	missense_variant	MODERATE	MPN007	p.Phe175Ile	gene
310	p2_2_S1	2	9709	0	62	60	2	3.33333	A	G	missense_variant	MODERATE	MPN007	p.Thr176Ala	gene
311	p2_2_S1	2	9716	4.1742e-15	65	64	1	1.5625	TAA	CAG	missense_variant	MODERATE	MPN007	p.LeuLys178SerGlu	gene
312	p2_2_S1	2	9725	0	62	61	1	1.63934	TTAT	CTAC	missense_variant	MODERATE	MPN007	p.IleIle181ThrThr	gene
313	p2_2_S1	2	9744	0	72	71	1	1.40845	TAA	CAG	missense_variant	MODERATE	MPN007	p.Lys188Arg	gene
314	p2_2_S1	2	9785	3.54489e-15	79	78	1	1.28205	T	G	missense_variant	MODERATE	MPN007	p.Leu201Trp	gene
315	p2_2_S1	2	9788	2.24884e-15	78	77	1	1.2987	TTAA	CTAG	missense_variant	MODERATE	MPN007	p.PheLys202SerArg	gene
316	p2_2_S1	2	9826	2.70464e-15	91	89	2	2.24719	A	G	missense_variant	MODERATE	MPN007	p.Asn215Asp	gene
317	p2_2_S1	2	9851	6.2686e-15	83	81	2	2.46914	A	T	missense_variant	MODERATE	MPN007	p.Asp223Val	gene
318	p2_2_S1	2	9883	2.63919e-16	69	68	1	1.47059	G	C	missense_variant	MODERATE	MPN007	p.Val234Leu	gene
319	p2_2_S1	2	9899	1.22848e-15	77	75	2	2.66667	T	C	missense_variant	MODERATE	MPN007	p.Phe239Ser	gene
320	p2_2_S1	2	9904	2.0492e-15	74	73	1	1.36986	CCACCGAA	TCTCTGAT	missense_variant	MODERATE	MPN007	p.ProProLys241SerLeuIle	gene
321	p2_2_S1	2	9932	0	70	68	2	2.94118	TCATTAA	ACATAAA	missense_variant	MODERATE	MPN007	p.Leu250His	gene
322	p2_2_S1	2	10117	0	77	76	1	1.31579	C	T	synonymous_variant	LOW	MPN008	p.Asn57Asn	gene
323	p2_2_S1	2	10136	0	76	75	1	1.33333	G	A	missense_variant	MODERATE	MPN008	p.Val64Met	gene
324	p2_2_S1	2	10174	3.1642e-16	57	56	1	1.78571	TGGGG	AGGAA	missense_variant	MODERATE	MPN008	p.Glu78Lys	gene
325	p2_2_S1	2	10192	0	49	48	1	2.08333	AAT	TAC	missense_variant	MODERATE	MPN008	p.GluIle82AspThr	gene
326	p2_2_S1	2	10298	0	66	65	1	1.53846	C	T	missense_variant	MODERATE	MPN008	p.Leu118Phe	gene
327	p2_2_S1	2	10302	6.05059e-17	65	64	1	1.5625	AC	GT	missense_variant	MODERATE	MPN008	p.Asn119Ser	gene
328	p2_2_S1	2	10307	3.26614e-15	67	66	1	1.51515	AAGA	GAGG	missense_variant	MODERATE	MPN008	p.LysMet121GluVal	gene
329	p2_2_S1	2	10323	0	61	60	1	1.66667	AAGCG	TAGCT	missense_variant	MODERATE	MPN008	p.Gln126Leu	gene
330	p2_2_S1	2	10347	0	67	66	1	1.51515	T	A	missense_variant	MODERATE	MPN008	p.Val134Glu	gene
331	p2_2_S1	2	10358	3.44695e-15	76	75	1	1.33333	AAT	TAC	missense_variant	MODERATE	MPN008	p.Asn138Tyr	gene
332	p2_2_S1	2	10369	0	89	88	1	1.13636	A	T	synonymous_variant	LOW	MPN008	p.Leu141Leu	gene
333	p2_2_S1	2	10386	3.52629e-15	79	78	1	1.28205	A	T	missense_variant	MODERATE	MPN008	p.Asn147Ile	gene
334	p2_2_S1	2	10391	0	85	84	1	1.19048	T	G	missense_variant	MODERATE	MPN008	p.Leu149Val	gene
335	p2_2_S1	2	10398	1.60494e-15	92	91	1	1.0989	G	A	missense_variant	MODERATE	MPN008	p.Gly151Asp	gene
336	p2_2_S1	2	10407	0	86	85	1	1.17647	A	G	missense_variant	MODERATE	MPN008	p.Asp154Gly	gene
337	p2_2_S1	2	10417	2.67497e-15	88	86	2	2.32558	A	T	missense_variant	MODERATE	MPN008	p.Leu157Phe	gene
338	p2_2_S1	2	10421	0	91	90	1	1.11111	C	T	missense_variant	MODERATE	MPN008	p.Pro159Ser	gene
339	p2_2_S1	2	10437	0	72	71	1	1.40845	TGGGT	AGGGA	stop_gained	HIGH	MPN008	p.Leu164*	gene
340	p2_2_S1	2	10722	2.78774e-15	72	71	1	1.40845	A	T	missense_variant	MODERATE	MPN008	p.Asp259Val	gene
341	p2_2_S1	2	10735	0	63	61	2	3.27869	C	A	missense_variant	MODERATE	MPN008	p.Asn263Lys	gene
342	p2_2_S1	2	10773	0	53	51	2	3.92157	G	A	missense_variant	MODERATE	MPN008	p.Arg276His	gene
343	p2_2_S1	2	10787	3.29251e-15	55	53	2	3.77358	G	A	missense_variant	MODERATE	MPN008	p.Ala281Thr	gene
344	p2_2_S1	2	10809	2.50899e-15	56	55	1	1.81818	AAAAA	TAAAG	missense_variant	MODERATE	MPN008	p.Gln288Leu	gene
345	p2_2_S1	2	10822	0	50	48	2	4.16667	C	T	synonymous_variant	LOW	MPN008	p.Gly292Gly	gene
346	p2_2_S1	2	10827	3.1642e-16	57	56	1	1.78571	TTA	CTG	missense_variant	MODERATE	MPN008	p.IleLys294ThrGlu	gene
347	p2_2_S1	2	10856	3.1642e-16	57	56	1	1.78571	TTG	ATA	missense_variant	MODERATE	MPN008	p.Leu304Ile	gene
348	p2_2_S1	2	10890	1.16798e-15	62	61	1	1.63934	TTAT	CTAC	missense_variant	MODERATE	MPN008	p.IleIle315ThrThr	gene
349	p2_2_S1	2	10975	0	67	66	1	1.51515	T	G	missense_variant	MODERATE	MPN008	p.Ser343Arg	gene
350	p2_2_S1	2	11016	7.76453e-16	55	54	1	1.85185	T	C	missense_variant	MODERATE	MPN008	p.Leu357Ser	gene
351	p2_2_S1	2	11046	0	58	56	2	3.57143	G	A	missense_variant	MODERATE	MPN008	p.Ser367Asn	gene
352	p2_2_S1	2	11049	1.29605e-15	58	57	1	1.75439	T	A	missense_variant	MODERATE	MPN008	p.Val368Glu	gene
353	p2_2_S1	2	11102	2.84801e-15	60	59	1	1.69492	AAA	CAT	missense_variant	MODERATE	MPN008	p.Lys386His	gene
354	p2_2_S1	2	11137	9.04528e-16	55	54	1	1.85185	ACAA	TCAG	missense_variant	MODERATE	MPN008	p.Lys397Asn	gene
355	p2_2_S1	2	11152	0	62	61	1	1.63934	TTTCT	ATTCA	missense_variant	MODERATE	MPN008	p.Phe404Ile	gene
356	p2_2_S1	2	11165	1.94019e-15	62	61	1	1.63934	CTAGTTGTTC	TTGGTGGTTG	missense_variant	MODERATE	MPN008	p.His410Asp	gene
357	p2_2_S1	2	11179	7.23269e-15	62	61	1	1.63934	A	T	missense_variant	MODERATE	MPN008	p.Leu411Phe	gene
358	p2_2_S1	2	11250	1.73278e-16	66	65	1	1.53846	TTA	ATG	missense_variant	MODERATE	MPN008	p.PheLys435TyrGlu	gene
359	p2_2_S1	2	11273	0	71	70	1	1.42857	T	A	upstream_gene_variant	MODIFIER	MPN009	c.-2T>A	intergenic
360	p2_2_S1	2	11290	5.68049e-15	70	69	1	1.44928	G	A	missense_variant	MODERATE	MPN009	p.Ala6Thr	gene
361	p2_2_S1	2	11314	3.00622e-15	73	71	2	2.8169	C	T	missense_variant	MODERATE	MPN009	p.Pro14Ser	gene
362	p2_2_S1	2	11356	6.56972e-15	65	63	2	3.1746	T	C	synonymous_variant	LOW	MPN009	p.Leu28Leu	gene
363	p2_2_S1	2	11380	7.76453e-16	55	54	1	1.85185	G	A	missense_variant	MODERATE	MPN009	p.Val36Met	gene
364	p2_2_S1	2	11392	0	44	43	1	2.32558	T	C	synonymous_variant	LOW	MPN009	p.Leu40Leu	gene
365	p2_2_S1	2	11398	0	45	44	1	2.27273	A	G	missense_variant	MODERATE	MPN009	p.Asn42Asp	gene
366	p2_2_S1	2	11407	6.856e-15	47	45	2	4.44444	A	T	missense_variant	MODERATE	MPN009	p.Ile45Phe	gene
367	p2_2_S1	2	11446	3.29604e-15	58	57	1	1.75439	A	T	stop_gained	HIGH	MPN009	p.Lys58*	gene
368	p2_2_S1	2	11458	0	50	49	1	2.04082	G	A	missense_variant	MODERATE	MPN009	p.Gly62Ser	gene
369	p2_2_S1	2	11464	0	49	48	1	2.08333	CACCCTA	TACTCTT	missense_variant	MODERATE	MPN009	p.HisProAsn64TyrSerTyr	gene
370	p2_2_S1	2	11495	0	57	56	1	1.78571	A	G	missense_variant	MODERATE	MPN009	p.Lys74Arg	gene
371	p2_2_S1	2	11500	2.27521e-15	69	68	1	1.47059	G	T	missense_variant	MODERATE	MPN009	p.Ala76Ser	gene
372	p2_2_S1	2	11516	0	63	62	1	1.6129	AAAAAT	TTAAAC	missense_variant	MODERATE	MPN009	p.Lys81Ile	gene
373	p2_2_S1	2	11545	1.88345e-16	86	85	1	1.17647	ATTA	TTTT	missense_variant	MODERATE	MPN009	p.IleSer91PheCys	gene
374	p2_2_S1	2	11562	8.70626e-16	85	84	1	1.19048	A	G	synonymous_variant	LOW	MPN009	p.Glu96Glu	gene
375	p2_2_S1	2	11594	0	107	106	1	0.943396	A	G	missense_variant	MODERATE	MPN009	p.Tyr107Cys	gene
376	p2_2_S1	2	11612	2.84801e-15	82	80	2	2.5	A	T	missense_variant	MODERATE	MPN009	p.Gln113Leu	gene
377	p2_2_S1	2	11647	3.49569e-15	95	94	1	1.06383	TACCA	CACCG	missense_variant	MODERATE	MPN009	p.TyrGln125HisArg	gene
378	p2_2_S1	2	11730	2.78986e-16	64	63	1	1.5873	AGTG	TGTA	synonymous_variant	LOW	MPN009	p.154	gene
379	p2_2_S1	2	11770	4.91228e-15	60	58	2	3.44828	T	C	synonymous_variant	LOW	MPN009	p.Leu166Leu	gene
380	p2_2_S1	2	11786	4.14595e-16	60	59	1	1.69492	T	C	missense_variant	MODERATE	MPN009	p.Leu171Ser	gene
381	p2_2_S1	2	11789	0	55	54	1	1.85185	GAGAA	CAGAT	missense_variant	MODERATE	MPN009	p.ArgGlu172ThrAsp	gene
382	p2_2_S1	2	11799	0	59	58	1	1.72414	ACTA	TCTT	synonymous_variant	LOW	MPN009	p.177	gene
383	p2_2_S1	2	11839	7.60962e-15	57	56	1	1.78571	A	T	stop_gained	HIGH	MPN009	p.Lys189*	gene
384	p2_2_S1	2	11873	3.43565e-15	58	57	1	1.75439	TTAT	CTAC	missense_variant	MODERATE	MPN009	p.ValIle200AlaThr	gene
385	p2_2_S1	2	11888	2.0492e-15	65	64	1	1.5625	T	A	missense_variant	MODERATE	MPN009	p.Leu205Gln	gene
386	p2_2_S1	2	11889	0	71	70	1	1.42857	A	G	synonymous_variant	LOW	MPN009	p.Leu205Leu	gene
387	p2_2_S1	2	11980	3.51075e-15	69	68	1	1.47059	ACGA	TCGT	missense_variant	MODERATE	MPN009	p.ThrIle236SerPhe	gene
388	p2_2_S1	2	12016	3.6878e-15	65	64	1	1.5625	ATAA	TTAT	stop_gained	HIGH	MPN009	p.IleLys248*	gene
389	p2_2_S1	2	12049	3.13406e-15	76	75	1	1.33333	TTATT	CTATC	missense_variant	MODERATE	MPN009	p.Phe260Ser	gene
390	p2_2_S1	2	12062	0	80	79	1	1.26582	C	A	upstream_gene_variant	MODIFIER	MPN010	c.-195C>A	intergenic
391	p2_2_S1	2	12064	0	73	72	1	1.38889	T	A	upstream_gene_variant	MODIFIER	MPN010	c.-193T>A	intergenic
392	p2_2_S1	2	12076	1.97409e-15	64	61	3	4.91803	TTTAA	CTTTG	upstream_gene_variant	MODIFIER	MPN010	c.-181_-177delTTTAAinsCTTTG	intergenic
393	p2_2_S1	2	12128	4.89698e-16	73	72	1	1.38889	A	G	upstream_gene_variant	MODIFIER	MPN010	c.-129A>G	intergenic
394	p2_2_S1	2	12166	3.59386e-15	67	66	1	1.51515	TTAGT	ATAGC	upstream_gene_variant	MODIFIER	MPN010	c.-91_-87delTTAGTinsATAGC	intergenic
395	p2_2_S1	2	12177	0	62	61	1	1.63934	TTAA	CTAT	upstream_gene_variant	MODIFIER	MPN010	c.-80_-77delTTAAinsCTAT	intergenic
396	p2_2_S1	2	12202	7.466e-15	66	65	1	1.53846	A	T	upstream_gene_variant	MODIFIER	MPN010	c.-55A>T	intergenic
397	p2_2_S1	2	12211	0	71	70	1	1.42857	G	C	upstream_gene_variant	MODIFIER	MPN010	c.-46G>C	intergenic
398	p2_2_S1	2	12225	0	67	66	1	1.51515	A	G	upstream_gene_variant	MODIFIER	MPN010	c.-32A>G	intergenic
399	p2_2_S1	2	12229	2.20034e-15	65	64	1	1.5625	TCTTTAA	ACTATAG	upstream_gene_variant	MODIFIER	MPN010	c.-28_-22delTCTTTAAinsACTATAG	intergenic
400	p2_2_S1	2	12237	1.65979e-16	66	65	1	1.53846	AAGAA	TAGAT	upstream_gene_variant	MODIFIER	MPN010	c.-20_-16delAAGAAinsTAGAT	intergenic
401	p2_2_S1	2	12243	2.60152e-16	66	65	1	1.53846	GGAGG	CGAGC	upstream_gene_variant	MODIFIER	MPN010	c.-14_-10delGGAGGinsCGAGC	intergenic
402	p2_2_S1	2	12254	3.11947e-15	61	59	2	3.38983	T	A	upstream_gene_variant	MODIFIER	MPN010	c.-3T>A	intergenic
403	p2_2_S1	2	12263	0	49	47	2	4.25532	TACTCGC	AACTTGA	missense_variant	MODERATE	MPN010	p.TyrSerPro3AsnLeuThr	gene
404	p2_2_S1	2	12278	3.0891e-15	54	53	1	1.88679	A	T	missense_variant	MODERATE	MPN010	p.Asn8Tyr	gene
405	p2_2_S1	2	12279	7.76453e-16	55	54	1	1.85185	A	G	missense_variant	MODERATE	MPN010	p.Asn8Ser	gene
406	p2_2_S1	2	12292	1.95102e-15	54	53	1	1.88679	CATTTTG	GATTATA	missense_variant	MODERATE	MPN010	p.SerIleLeu12ArgIleIle	gene
407	p2_2_S1	2	12494	0	58	57	1	1.75439	A	G	missense_variant	MODERATE	MPN010	p.Met80Val	gene
408	p2_2_S1	2	12547	7.60962e-15	57	56	1	1.78571	C	T	synonymous_variant	LOW	MPN010	p.Ile97Ile	gene
409	p2_2_S1	2	12548	2.1848e-15	56	55	1	1.81818	A	T	stop_gained	HIGH	MPN010	p.Lys98*	gene
410	p2_2_S1	2	12561	0	53	52	1	1.92308	TTGAA	CTGAG	missense_variant	MODERATE	MPN010	p.Val102Ala	gene
411	p2_2_S1	2	12622	0	59	58	1	1.72414	C	A	missense_variant	MODERATE	MPN010	p.Asn122Lys	gene
412	p2_2_S1	2	12623	4.67332e-16	48	47	1	2.12766	AAA	TAT	missense_variant	MODERATE	MPN010	p.Lys123Tyr	gene
413	p2_2_S1	2	12638	0	38	37	1	2.7027	TTAGA	ATAGT	missense_variant	MODERATE	MPN010	p.LeuGlu128IleVal	gene
414	p2_2_S1	2	12652	3.59763e-15	40	39	1	2.5641	A	G	upstream_gene_variant	MODIFIER	MPN013	c.-2340A>G	intergenic
415	p2_2_S1	2	12660	7.08649e-16	39	38	1	2.63158	AAGCA	TTGCT	upstream_gene_variant	MODIFIER	MPN013	c.-2332_-2328delAAGCAinsTTGCT	intergenic
416	p2_2_S1	2	12675	2.48639e-15	38	37	1	2.7027	C	T	upstream_gene_variant	MODIFIER	MPN013	c.-2317C>T	intergenic
417	p2_2_S1	2	12680	1.88345e-16	39	38	1	2.63158	G	A	upstream_gene_variant	MODIFIER	MPN013	c.-2312G>A	intergenic
418	p2_2_S1	2	12738	2.75031e-15	32	30	2	6.66667	AAAAA	TAAAT	upstream_gene_variant	MODIFIER	MPN013	c.-2254_-2250delAAAAAinsTAAAT	intergenic
419	p2_2_S1	2	12895	1.4545e-15	49	48	1	2.08333	G	A	synonymous_variant	LOW	MPN011	p.Tyr213Tyr	gene
420	p2_2_S1	2	12972	0	73	71	2	2.8169	GAAACG	GAACG	frameshift_variant	HIGH	MPN011	p.His188fs	gene
421	p2_2_S1	2	12986	7.3231e-15	75	74	1	1.35135	A	G	missense_variant	MODERATE	MPN011	p.Leu183Ser	gene
422	p2_2_S1	2	13016	0	66	64	2	3.125	T	A	missense_variant	MODERATE	MPN011	p.Asn173Ile	gene
423	p2_2_S1	2	13028	5.68049e-15	70	69	1	1.44928	A	G	missense_variant	MODERATE	MPN011	p.Phe169Ser	gene
424	p2_2_S1	2	13029	0	67	66	1	1.51515	A	G	missense_variant	MODERATE	MPN011	p.Phe169Leu	gene
425	p2_2_S1	2	13037	0	72	71	1	1.40845	T	A	missense_variant	MODERATE	MPN011	p.Tyr166Phe	gene
426	p2_2_S1	2	13045	0	63	62	1	1.6129	C	T	synonymous_variant	LOW	MPN011	p.Ala163Ala	gene
427	p2_2_S1	2	13156	3.82741e-15	61	60	1	1.66667	A	T	synonymous_variant	LOW	MPN011	p.Val126Val	gene
428	p2_2_S1	2	13157	8.06588e-16	63	62	1	1.6129	ACTGA	GCTGG	missense_variant	MODERATE	MPN011	p.SerVal125ProAla	gene
429	p2_2_S1	2	13175	3.68403e-15	70	69	1	1.44928	C	T	missense_variant	MODERATE	MPN011	p.Gly120Asp	gene
430	p2_2_S1	2	13178	5.1835e-15	63	60	3	5	TTGTATGTCA	CTGCATGTCA	missense_variant	MODERATE	MPN011	p.TyrLys118CysArg	gene
431	p2_2_S1	2	13193	9.1936e-16	73	72	1	1.38889	AAA	TAT	stop_gained	HIGH	MPN011	p.TyrPhe113*	gene
432	p2_2_S1	2	13208	0	64	63	1	1.5873	TGTTTC	AGATTG	missense_variant	MODERATE	MPN011	p.LysLysGln107AsnAsnLeu	gene
433	p2_2_S1	2	13217	0	64	63	1	1.5873	T	C	missense_variant	MODERATE	MPN011	p.Asn106Ser	gene
434	p2_2_S1	2	13225	2.0492e-15	65	64	1	1.5625	A	G	synonymous_variant	LOW	MPN011	p.Asn103Asn	gene
435	p2_2_S1	2	13226	1.47663e-15	67	66	1	1.51515	TTAAC	CTAAT	missense_variant	MODERATE	MPN011	p.ValAsn102IleSer	gene
436	p2_2_S1	2	13234	0	54	52	2	3.84615	T	C	synonymous_variant	LOW	MPN011	p.Ser100Ser	gene
437	p2_2_S1	2	13237	0	49	48	1	2.08333	AAA	TAG	missense_variant	MODERATE	MPN011	p.Phe99Leu	gene
438	p2_2_S1	2	13309	6.93346e-16	58	57	1	1.75439	TAGT	AAGA	missense_variant	MODERATE	MPN011	p.Leu74Phe	gene
439	p2_2_S1	2	13339	1.80835e-15	41	39	2	5.12821	A	G	synonymous_variant	LOW	MPN011	p.Val65Val	gene
440	p2_2_S1	2	13367	4.14595e-16	60	59	1	1.69492	A	T	missense_variant	MODERATE	MPN011	p.Ile56Lys	gene
441	p2_2_S1	2	13431	1.21341e-15	47	46	1	2.17391	TTTCCTT	ATTGCTA	stop_gained	HIGH	MPN011	p.LysGluThr33*	gene
442	p2_2_S1	2	13554	4.50569e-15	71	68	3	4.41176	TTAAT	ATAAA	upstream_gene_variant	MODIFIER	MPN011	c.-25_-21delATTAAinsTTTAT	intergenic
443	p2_2_S1	2	13578	0	79	77	2	2.5974	A	G	synonymous_variant	LOW	MPN012	p.Leu230Leu	gene
444	p2_2_S1	2	13579	1.07886e-14	76	75	1	1.33333	AGA	TGT	missense_variant	MODERATE	MPN012	p.Ser229Thr	gene
445	p2_2_S1	2	13624	0	64	63	1	1.5873	CCAAAAA	TCATAAT	missense_variant	MODERATE	MPN012	p.Phe213Leu	gene
446	p2_2_S1	2	13636	1.36385e-15	68	66	2	3.0303	T	C	synonymous_variant	LOW	MPN012	p.Arg210Arg	gene
447	p2_2_S1	2	13643	3.81211e-15	70	69	1	1.44928	ATC	TTT	missense_variant	MODERATE	MPN012	p.Ile208Asn	gene
448	p2_2_S1	2	13680	0	80	78	2	2.5641	A	G	missense_variant	MODERATE	MPN012	p.Trp196Arg	gene
449	p2_2_S1	2	13696	3.43918e-15	76	75	1	1.33333	GAA	CAT	missense_variant	MODERATE	MPN012	p.Phe190Met	gene
450	p2_2_S1	2	13716	0	81	79	2	2.53165	C	T	missense_variant	MODERATE	MPN012	p.Asp184Asn	gene
451	p2_2_S1	2	13745	6.99161e-15	58	57	1	1.75439	CTTATCGTT	GTTAACGTA	missense_variant	MODERATE	MPN012	p.LysThrIleSer171AsnThrLeuThr	gene
452	p2_2_S1	2	13874	3.09122e-16	39	38	1	2.63158	AACTT	GACTA	stop_gained	HIGH	MPN012	p.LysLeu130*	gene
453	p2_2_S1	2	13993	4.14595e-16	60	59	1	1.69492	A	T	synonymous_variant	LOW	MPN012	p.Ile91Ile	gene
454	p2_2_S1	2	13996	0	66	65	1	1.53846	TTTC	ATTG	missense_variant	MODERATE	MPN012	p.GluLys89AspAsn	gene
455	p2_2_S1	2	14005	3.81211e-15	70	69	1	1.44928	ATC	CTG	missense_variant	MODERATE	MPN012	p.Asp87Gln	gene
456	p2_2_S1	2	14010	3.81211e-15	70	69	1	1.44928	TTT	ATA	missense_variant	MODERATE	MPN012	p.GluIle85ValLeu	gene
457	p2_2_S1	2	14015	0	63	62	1	1.6129	CCT	GCC	missense_variant	MODERATE	MPN012	p.Gly84Ala	gene
458	p2_2_S1	2	14018	0	55	54	1	1.85185	T	C	missense_variant	MODERATE	MPN012	p.Lys83Arg	gene
459	p2_2_S1	2	14044	0	59	58	1	1.72414	T	A	missense_variant	MODERATE	MPN012	p.Leu74Phe	gene
460	p2_2_S1	2	14054	0	53	52	1	1.92308	T	A	missense_variant	MODERATE	MPN012	p.Lys71Ile	gene
461	p2_2_S1	2	14062	5.95171e-15	61	60	1	1.66667	TTTAT	CTTAC	missense_variant	MODERATE	MPN012	p.Asp67Gly	gene
462	p2_2_S1	2	14088	3.14207e-15	64	62	2	3.22581	T	C	missense_variant	MODERATE	MPN012	p.Lys60Glu	gene
463	p2_2_S1	2	14095	0	66	64	2	3.125	A	T	synonymous_variant	LOW	MPN012	p.Ser57Ser	gene
464	p2_2_S1	2	14115	0	70	68	2	2.94118	T	C	missense_variant	MODERATE	MPN012	p.Arg51Gly	gene
465	p2_2_S1	2	14147	2.74654e-15	88	87	1	1.14943	TCAA	CCAG	missense_variant	MODERATE	MPN012	p.ValAsp39AlaGly	gene
466	p2_2_S1	2	14246	0	62	60	2	3.33333	G	A	missense_variant	MODERATE	MPN012	p.Ser7Leu	gene
467	p2_2_S1	2	14258	2.93842e-15	63	62	1	1.6129	A	T	missense_variant	MODERATE	MPN012	p.Phe3Tyr	gene
468	p2_2_S1	2	14286	0	58	57	1	1.75439	T	A	upstream_gene_variant	MODIFIER	MPN011	c.-753A>T	intergenic
469	p2_2_S1	2	14303	0	52	51	1	1.96078	TTT	ATA	upstream_gene_variant	MODIFIER	MPN011	c.-772_-770delAAAinsTAT	intergenic
470	p2_2_S1	2	14314	5.57502e-16	51	50	1	2	T	A	upstream_gene_variant	MODIFIER	MPN011	c.-781A>T	intergenic
471	p2_2_S1	2	14329	0	52	51	1	1.96078	G	T	upstream_gene_variant	MODIFIER	MPN011	c.-796C>A	intergenic
472	p2_2_S1	2	14373	1.0552e-15	46	45	1	2.22222	AAA	GAG	upstream_gene_variant	MODIFIER	MPN011	c.-842_-840delTTTinsCTC	intergenic
473	p2_2_S1	2	14451	4.71098e-16	48	47	1	2.12766	TTGTT	CTGTC	upstream_gene_variant	MODIFIER	MPN011	c.-922_-918delAACAAinsGACAG	intergenic
474	p2_2_S1	2	14567	1.59764e-15	40	39	1	2.5641	T	A	upstream_gene_variant	MODIFIER	MPN011	c.-1034A>T	intergenic
475	p2_2_S1	2	14639	0	50	49	1	2.04082	AAA	TAG	upstream_gene_variant	MODIFIER	MPN011	c.-1108_-1106delTTTinsCTA	intergenic
476	p2_2_S1	2	14703	0	50	49	1	2.04082	T	A	upstream_gene_variant	MODIFIER	MPN011	c.-1170A>T	intergenic
477	p2_2_S1	2	14725	2.34725e-15	47	46	1	2.17391	T	A	upstream_gene_variant	MODIFIER	MPN011	c.-1192A>T	intergenic
478	p2_2_S1	2	14729	1.67251e-15	50	48	2	4.16667	T	C	upstream_gene_variant	MODIFIER	MPN011	c.-1196A>G	intergenic
479	p2_2_S1	2	14757	9.12062e-16	55	54	1	1.85185	GGTGA	AGTGT	upstream_gene_variant	MODIFIER	MPN011	c.-1228_-1224delTCACCinsACACT	intergenic
480	p2_2_S1	2	14777	2.117e-15	78	77	1	1.2987	A	G	upstream_gene_variant	MODIFIER	MPN011	c.-1244T>C	intergenic
481	p2_2_S1	2	14842	2.71688e-16	64	63	1	1.5873	TTTT	ATTA	upstream_gene_variant	MODIFIER	MPN011	c.-1312_-1309delAAAAinsTAAT	intergenic
482	p2_2_S1	2	14849	4.14595e-16	60	59	1	1.69492	A	G	upstream_gene_variant	MODIFIER	MPN011	c.-1316T>C	intergenic
483	p2_2_S1	2	14879	0	54	53	1	1.88679	A	G	upstream_gene_variant	MODIFIER	MPN011	c.-1346T>C	intergenic
484	p2_2_S1	2	14910	0	39	38	1	2.63158	C	T	upstream_gene_variant	MODIFIER	MPN011	c.-1377G>A	intergenic
485	p2_2_S1	2	15028	0	57	55	2	3.63636	CTTTCCC	TTTACCC	missense_variant	MODERATE	MPN013	p.LeuSer13PheThr	gene
486	p2_2_S1	2	15041	1.97786e-15	52	51	1	1.96078	AGGA	TGGT	missense_variant	MODERATE	MPN013	p.LysGlu17MetVal	gene
487	p2_2_S1	2	15076	4.14595e-16	60	59	1	1.69492	C	T	stop_gained	HIGH	MPN013	p.Gln29*	gene
488	p2_2_S1	2	15114	1.16798e-15	62	61	1	1.63934	TTTT	ATTA	missense_variant	MODERATE	MPN013	p.PhePhe41LeuLeu	gene
489	p2_2_S1	2	15161	0	82	81	1	1.23457	C	T	missense_variant	MODERATE	MPN013	p.Pro57Leu	gene
490	p2_2_S1	2	15166	1.80835e-15	71	70	1	1.42857	CAA	TAG	stop_gained	HIGH	MPN013	p.Gln59*	gene
491	p2_2_S1	2	15182	3.38292e-15	88	87	1	1.14943	G	C	missense_variant	MODERATE	MPN013	p.Cys64Ser	gene
492	p2_2_S1	2	15196	2.98009e-15	85	84	1	1.19048	CCAAA	TCAAT	missense_variant	MODERATE	MPN013	p.ProLys69SerMet	gene
493	p2_2_S1	2	15202	0	87	86	1	1.16279	GAAC	AAAG	missense_variant	MODERATE	MPN013	p.GluPro71LysAla	gene
494	p2_2_S1	2	15231	0	80	79	1	1.26582	T	C	synonymous_variant	LOW	MPN013	p.Gly80Gly	gene
495	p2_2_S1	2	15252	0	71	70	1	1.42857	T	A	synonymous_variant	LOW	MPN013	p.Pro87Pro	gene
496	p2_2_S1	2	15334	3.39257e-16	82	81	1	1.23457	A	G	missense_variant	MODERATE	MPN013	p.Ser115Gly	gene
497	p2_2_S1	2	15353	0	77	76	1	1.31579	T	C	missense_variant	MODERATE	MPN013	p.Val121Ala	gene
498	p2_2_S1	2	15366	0	82	81	1	1.23457	T	A	missense_variant	MODERATE	MPN013	p.Asp125Glu	gene
499	p2_2_S1	2	15370	0	93	92	1	1.08696	T	C	missense_variant	MODERATE	MPN013	p.Tyr127His	gene
500	p2_2_S1	2	15381	0	96	95	1	1.05263	C	A	missense_variant	MODERATE	MPN013	p.His130Gln	gene
501	p2_2_S1	2	15415	0	77	76	1	1.31579	A	G	missense_variant	MODERATE	MPN013	p.Thr142Ala	gene
502	p2_2_S1	2	15419	0	72	71	1	1.40845	A	G	missense_variant	MODERATE	MPN013	p.Lys143Arg	gene
503	p2_2_S1	2	15428	0	76	75	1	1.33333	T	A	missense_variant	MODERATE	MPN013	p.Phe146Tyr	gene
504	p2_2_S1	2	15431	5.1536e-15	84	83	1	1.20482	A	C	missense_variant	MODERATE	MPN013	p.Lys147Thr	gene
505	p2_2_S1	2	15443	3.63153e-15	86	85	1	1.17647	ACAAA	TCAAG	missense_variant	MODERATE	MPN013	p.Asp151Val	gene
506	p2_2_S1	2	15451	3.39798e-15	88	87	1	1.14943	G	A	missense_variant	MODERATE	MPN013	p.Asp154Asn	gene
507	p2_2_S1	2	15456	2.75219e-16	78	77	1	1.2987	TTTATTT	ATCATTA	missense_variant	MODERATE	MPN013	p.LeuPhe156SerLeu	gene
508	p2_2_S1	2	15467	7.30756e-15	75	74	1	1.35135	T	A	missense_variant	MODERATE	MPN013	p.Leu159Gln	gene
509	p2_2_S1	2	15485	6.78043e-15	81	77	4	5.19481	AACAAATAA	GACAGATGA	missense_variant	MODERATE	MPN013	p.GluGlnIle165GlyGlnMet	gene
510	p2_2_S1	2	15502	8.70626e-16	85	84	1	1.19048	G	A	missense_variant	MODERATE	MPN013	p.Gly171Ser	gene
511	p2_2_S1	2	15527	9.0029e-16	55	54	1	1.85185	AACAA	TACAG	missense_variant	MODERATE	MPN013	p.Lys179Ile	gene
512	p2_2_S1	2	15562	1.66521e-15	50	48	2	4.16667	C	T	stop_gained	HIGH	MPN013	p.Gln191*	gene
513	p2_2_S1	2	15614	0	63	61	2	3.27869	A	T	missense_variant	MODERATE	MPN013	p.Glu208Val	gene
514	p2_2_S1	2	15693	0	67	66	1	1.51515	T	A	synonymous_variant	LOW	MPN013	p.Gly234Gly	gene
515	p2_2_S1	2	15713	0	50	49	1	2.04082	T	A	stop_gained	HIGH	MPN013	p.Leu241*	gene
516	p2_2_S1	2	15794	2.33572e-15	47	46	1	2.17391	T	A	upstream_gene_variant	MODIFIER	MPN011	c.-2261A>T	intergenic
517	p2_2_S1	2	15803	0	57	56	1	1.78571	ATA	TTT	upstream_gene_variant	MODIFIER	MPN011	c.-2272_-2270delTATinsAAA	intergenic
518	p2_2_S1	2	15822	0	48	47	1	2.12766	T	A	upstream_gene_variant	MODIFIER	MPN011	c.-2289A>T	intergenic
519	p2_2_S1	2	15826	0	50	48	2	4.16667	ATT	GTA	upstream_gene_variant	MODIFIER	MPN011	c.-2295_-2293delAATinsTAC	intergenic
520	p2_2_S1	2	15862	0	61	60	1	1.66667	GTTAA	CTTAT	upstream_gene_variant	MODIFIER	MPN011	c.-2333_-2329delTTAACinsATAAG	intergenic
521	p2_2_S1	2	15871	0	62	61	1	1.63934	A	T	missense_variant	MODERATE	MPN014	p.Glu2Val	gene
522	p2_2_S1	2	15885	1.15668e-15	67	66	1	1.51515	A	T	stop_gained	HIGH	MPN014	p.Lys7*	gene
523	p2_2_S1	2	15896	3.82741e-15	73	71	2	2.8169	ACT	GCA	missense_variant	MODERATE	MPN014	p.Leu11His	gene
524	p2_2_S1	2	15915	5.68049e-15	70	69	1	1.44928	C	T	missense_variant	MODERATE	MPN014	p.Arg17Cys	gene
525	p2_2_S1	2	15956	3.82741e-15	61	60	1	1.66667	A	G	synonymous_variant	LOW	MPN014	p.Lys30Lys	gene
526	p2_2_S1	2	15958	0	63	61	2	3.27869	G	T	missense_variant	MODERATE	MPN014	p.Arg31Met	gene
527	p2_2_S1	2	15999	2.93089e-15	63	62	1	1.6129	T	C	synonymous_variant	LOW	MPN014	p.Leu45Leu	gene
528	p2_2_S1	2	16005	0	61	59	2	3.38983	T	C	missense_variant	MODERATE	MPN014	p.Tyr47His	gene
529	p2_2_S1	2	16047	0	71	70	1	1.42857	T	A	missense_variant	MODERATE	MPN014	p.Phe61Ile	gene
530	p2_2_S1	2	16061	1.15668e-15	67	66	1	1.51515	A	G	synonymous_variant	LOW	MPN014	p.Leu65Leu	gene
531	p2_2_S1	2	16080	2.95372e-15	67	65	2	3.07692	A	G	missense_variant	MODERATE	MPN014	p.Lys72Glu	gene
532	p2_2_S1	2	16204	0	53	52	1	1.92308	A	T	missense_variant	MODERATE	MPN014	p.Asp113Val	gene
533	p2_2_S1	2	16239	0	64	63	1	1.5873	T	A	missense_variant	MODERATE	MPN014	p.Leu125Met	gene
534	p2_2_S1	2	16262	0	62	61	1	1.63934	ATTA	TTTT	missense_variant	MODERATE	MPN014	p.Leu133Phe	gene
535	p2_2_S1	2	16268	0	68	67	1	1.49254	T	C	synonymous_variant	LOW	MPN014	p.Thr134Thr	gene
536	p2_2_S1	2	16292	2.53936e-15	60	59	1	1.69492	TTTT	ATTA	missense_variant	MODERATE	MPN014	p.PhePhe142LeuLeu	gene
537	p2_2_S1	2	16342	0	72	71	1	1.40845	TTGCTGGT	ATGCAAGA	missense_variant	MODERATE	MPN014	p.PheAlaGly159TyrAlaArg	gene
538	p2_2_S1	2	16429	4.57349e-15	77	76	1	1.31579	TTA	CTG	missense_variant	MODERATE	MPN014	p.ValLys188AlaGlu	gene
539	p2_2_S1	2	16457	0	70	69	1	1.44928	TTACC	CTACT	missense_variant	MODERATE	MPN014	p.Pro199Ser	gene
540	p2_2_S1	2	16475	0	74	73	1	1.36986	TAA	CAC	missense_variant	MODERATE	MPN014	p.Lys204Thr	gene
541	p2_2_S1	2	16480	8.70626e-16	85	84	1	1.19048	C	G	missense_variant	MODERATE	MPN014	p.Ala205Gly	gene
542	p2_2_S1	2	16498	2.64107e-15	78	77	1	1.2987	CGCTT	AACTC	missense_variant	MODERATE	MPN014	p.Ala211Glu	gene
543	p2_2_S1	2	16507	0	81	80	1	1.25	TGAT	AGAA	missense_variant	MODERATE	MPN015	p.HisHis277LeuLeu	gene
544	p2_2_S1	2	16516	0	83	82	1	1.21951	AA	GT	missense_variant	MODERATE	MPN015	p.Phe275Thr	gene
545	p2_2_S1	2	16520	3.75984e-15	83	82	1	1.21951	G	A	missense_variant	MODERATE	MPN015	p.His274Tyr	gene
546	p2_2_S1	2	16530	1.59764e-15	92	91	1	1.0989	C	G	synonymous_variant	LOW	MPN015	p.Ser270Ser	gene
547	p2_2_S1	2	16633	2.26038e-15	69	68	1	1.47059	T	C	missense_variant	MODERATE	MPN015	p.Lys236Arg	gene
548	p2_2_S1	2	16709	1.76315e-15	83	82	1	1.21951	A	G	missense_variant	MODERATE	MPN015	p.Tyr211His	gene
549	p2_2_S1	2	16739	0	77	75	2	2.66667	C	A	missense_variant	MODERATE	MPN015	p.Ala201Ser	gene
550	p2_2_S1	2	16824	0	52	51	1	1.96078	CCGGTA	TCCGTG	missense_variant	MODERATE	MPN015	p.TyrArg171HisGly	gene
551	p2_2_S1	2	16842	0	44	42	2	4.7619	A	T	synonymous_variant	LOW	MPN015	p.Ile166Ile	gene
552	p2_2_S1	2	16912	0	54	53	1	1.88679	TTT	CTC	missense_variant	MODERATE	MPN015	p.Asn143Ser	gene
553	p2_2_S1	2	16995	0	39	38	1	2.63158	AAA	TAG	missense_variant	MODERATE	MPN015	p.Phe115Leu	gene
554	p2_2_S1	2	17030	0	48	47	1	2.12766	G	C	missense_variant	MODERATE	MPN015	p.Gln104Glu	gene
555	p2_2_S1	2	17078	1.0213e-15	42	41	1	2.43902	TATTTTG	CAGTTTC	missense_variant	MODERATE	MPN015	p.GlnAsnIle86GluThrVal	gene
556	p2_2_S1	2	17093	7.55735e-17	42	41	1	2.43902	TGAG	GGAA	missense_variant	MODERATE	MPN015	p.LeuIle82PheLeu	gene
557	p2_2_S1	2	17113	0	52	51	1	1.96078	T	A	missense_variant	MODERATE	MPN015	p.Asn76Ile	gene
558	p2_2_S1	2	17119	1.5522e-15	56	55	1	1.81818	TTGGTTAAA	CTGGCTAAT	missense_variant	MODERATE	MPN015	p.PheLeuThrLys71LeuLeuAlaArg	gene
559	p2_2_S1	2	17128	0	56	55	1	1.81818	A	G	missense_variant	MODERATE	MPN015	p.Phe71Ser	gene
560	p2_2_S1	2	17175	6.21775e-16	64	63	1	1.5873	G	T	missense_variant	MODERATE	MPN015	p.His55Gln	gene
561	p2_2_S1	2	17263	0	36	35	1	2.85714	A	C	missense_variant	MODERATE	MPN015	p.Phe26Cys	gene
562	p2_2_S1	2	17284	0	37	36	1	2.77778	T	C	missense_variant	MODERATE	MPN015	p.Asp19Gly	gene
563	p2_2_S1	2	17312	0	44	43	1	2.32558	T	C	missense_variant	MODERATE	MPN015	p.Lys10Glu	gene
564	p2_2_S1	2	17367	1.88345e-16	39	38	1	2.63158	G	T	missense_variant	MODERATE	MPN016	p.Ala280Asp	gene
565	p2_2_S1	2	17410	0	63	61	2	3.27869	C	T	missense_variant	MODERATE	MPN016	p.Val266Ile	gene
566	p2_2_S1	2	17456	3.84224e-15	51	49	2	4.08163	TAAAA	AAAAT	missense_variant	MODERATE	MPN016	p.PheLeu249TyrPhe	gene
567	p2_2_S1	2	17482	0	57	56	1	1.78571	GTTGCATTGCT	ATTACATAGTA	stop_gained	HIGH	MPN016	p.GlnAlaMetGlnLeu238*	gene
568	p2_2_S1	2	17493	2.0492e-15	65	64	1	1.5625	T	C	missense_variant	MODERATE	MPN016	p.Gln238Arg	gene
569	p2_2_S1	2	17501	1.95102e-15	62	61	1	1.63934	TGT	AGA	missense_variant	MODERATE	MPN016	p.Thr235Ser	gene
570	p2_2_S1	2	17512	0	63	62	1	1.6129	A	G	synonymous_variant	LOW	MPN016	p.Leu232Leu	gene
571	p2_2_S1	2	17516	4.77691e-15	69	67	2	2.98507	G	A	synonymous_variant	LOW	MPN016	p.Thr230Thr	gene
572	p2_2_S1	2	17535	1.04014e-15	83	81	2	2.46914	T	C	missense_variant	MODERATE	MPN016	p.Gln224Arg	gene
573	p2_2_S1	2	17651	0	53	52	1	1.92308	A	G	synonymous_variant	LOW	MPN016	p.Asn185Asn	gene
574	p2_2_S1	2	17776	0	59	58	1	1.72414	C	G	missense_variant	MODERATE	MPN016	p.Val144Leu	gene
575	p2_2_S1	2	17784	3.11947e-15	61	59	2	3.38983	G	A	missense_variant	MODERATE	MPN016	p.Pro141Leu	gene
576	p2_2_S1	2	17799	0	66	65	1	1.53846	C	T	missense_variant	MODERATE	MPN016	p.Arg136His	gene
577	p2_2_S1	2	17814	0	66	64	2	3.125	A	G	missense_variant	MODERATE	MPN016	p.Ile131Thr	gene
578	p2_2_S1	2	17829	0	65	64	1	1.5625	TTTTC	ATTTG	missense_variant	MODERATE	MPN016	p.GluLys125GlnMet	gene
579	p2_2_S1	2	17836	2.41129e-15	60	59	1	1.69492	G	A	missense_variant	MODERATE	MPN016	p.Pro124Ser	gene
580	p2_2_S1	2	17846	0	69	68	1	1.47059	TAAAC	AAAAA	missense_variant	MODERATE	MPN016	p.ArgLeu119LeuPhe	gene
581	p2_2_S1	2	17859	0	66	64	2	3.125	TGTGG	AGTGA	missense_variant	MODERATE	MPN016	p.ProGln115SerLeu	gene
582	p2_2_S1	2	17866	1.49216e-15	57	56	1	1.78571	CAATTAAT	TAATAAAA	missense_variant	MODERATE	MPN016	p.LeuIleGly112PheIleSer	gene
583	p2_2_S1	2	17886	0	53	52	1	1.92308	T	A	missense_variant	MODERATE	MPN016	p.Lys107Ile	gene
584	p2_2_S1	2	17909	0	64	63	1	1.5873	A	G	synonymous_variant	LOW	MPN016	p.Val99Val	gene
585	p2_2_S1	2	17926	0	76	74	2	2.7027	C	T	missense_variant	MODERATE	MPN016	p.Ala94Thr	gene
586	p2_2_S1	2	17941	0	55	53	2	3.77358	T	A	missense_variant	MODERATE	MPN016	p.Asn89Tyr	gene
587	p2_2_S1	2	17950	0	59	58	1	1.72414	CAATC	TAATT	missense_variant	MODERATE	MPN016	p.Ala86Thr	gene
588	p2_2_S1	2	17985	1.29605e-15	67	66	1	1.51515	TCT	ACA	missense_variant	MODERATE	MPN016	p.LeuGlu73PheVal	gene
589	p2_2_S1	2	17993	0	59	58	1	1.72414	T	C	synonymous_variant	LOW	MPN016	p.Gln71Gln	gene
590	p2_2_S1	2	18014	0	59	58	1	1.72414	ATCCA	TTCCT	stop_gained	HIGH	MPN016	p.LeuAsp63*	gene
591	p2_2_S1	2	18042	4.14595e-16	60	59	1	1.69492	A	G	missense_variant	MODERATE	MPN016	p.Phe55Ser	gene
592	p2_2_S1	2	18056	5.68049e-15	70	69	1	1.44928	C	T	synonymous_variant	LOW	MPN016	p.Lys50Lys	gene
593	p2_2_S1	2	18123	0	63	61	2	3.27869	G	A	missense_variant	MODERATE	MPN016	p.Ala28Val	gene
594	p2_2_S1	2	18160	0	55	54	1	1.85185	C	G	missense_variant	MODERATE	MPN016	p.Ala16Pro	gene
595	p2_2_S1	2	18172	3.44695e-15	49	48	1	2.08333	A	G	missense_variant	MODERATE	MPN016	p.Phe12Leu	gene
596	p2_2_S1	2	18189	2.78986e-16	69	68	1	1.47059	G	C	missense_variant	MODERATE	MPN016	p.Ala6Gly	gene
597	p2_2_S1	2	18211	4.6413e-15	78	76	2	2.63158	A	G	missense_variant	MODERATE	MPN017	p.Val260Ala	gene
598	p2_2_S1	2	18234	0	94	93	1	1.07527	T	C	synonymous_variant	LOW	MPN017	p.Leu252Leu	gene
599	p2_2_S1	2	18236	0	96	95	1	1.05263	A	T	missense_variant	MODERATE	MPN017	p.Leu252Ile	gene
600	p2_2_S1	2	18258	0	109	108	1	0.925926	TCCAG	ACCAA	missense_variant	MODERATE	MPN017	p.Pro243Leu	gene
601	p2_2_S1	2	18264	3.46579e-15	114	113	1	0.884956	TGTGG	AGTGA	missense_variant	MODERATE	MPN017	p.Pro241Leu	gene
602	p2_2_S1	2	18335	1.67251e-15	105	104	1	0.961538	C	T	missense_variant	MODERATE	MPN017	p.Val219Ile	gene
603	p2_2_S1	2	18337	2.46379e-15	99	98	1	1.02041	TTA	CTG	missense_variant	MODERATE	MPN017	p.Asn218Ser	gene
604	p2_2_S1	2	18346	0	89	88	1	1.13636	A	C	missense_variant	MODERATE	MPN017	p.Val215Gly	gene
605	p2_2_S1	2	18347	0	104	103	1	0.970874	C	A	missense_variant	MODERATE	MPN017	p.Val215Leu	gene
606	p2_2_S1	2	18363	3.02883e-15	103	102	1	0.980392	AAT	TAC	missense_variant	MODERATE	MPN017	p.Ile209Val	gene
607	p2_2_S1	2	18367	0	100	99	1	1.0101	ACA	TCT	missense_variant	MODERATE	MPN017	p.Val208Asp	gene
608	p2_2_S1	2	18380	1.4545e-15	96	95	1	1.05263	AGTT	GGTC	missense_variant	MODERATE	MPN017	p.AsnPhe203AspLeu	gene
609	p2_2_S1	2	18389	7.16442e-15	93	92	1	1.08696	TCTT	CCTC	missense_variant	MODERATE	MPN017	p.LysThr200GluAla	gene
610	p2_2_S1	2	18398	0	95	94	1	1.06383	AATGG	TATGA	missense_variant	MODERATE	MPN017	p.Phe198Ile	gene
611	p2_2_S1	2	18406	0	85	83	2	2.40964	T	C	missense_variant	MODERATE	MPN017	p.Lys195Arg	gene
612	p2_2_S1	2	18420	2.00423e-15	81	80	1	1.25	GATCA	AATCT	missense_variant	MODERATE	MPN017	p.Val189Glu	gene
613	p2_2_S1	2	18439	0	84	83	1	1.20482	TTAAT	CTAAC	missense_variant	MODERATE	MPN017	p.IleLys183ValArg	gene
614	p2_2_S1	2	18454	0	99	98	1	1.02041	G	A	missense_variant	MODERATE	MPN017	p.Thr179Ile	gene
615	p2_2_S1	2	18459	0	97	95	2	2.10526	G	A	synonymous_variant	LOW	MPN017	p.Pro177Pro	gene
616	p2_2_S1	2	18502	6.87107e-15	102	101	1	0.990099	T	C	missense_variant	MODERATE	MPN017	p.Lys163Arg	gene
617	p2_2_S1	2	18504	3.46579e-15	101	100	1	1	T	C	synonymous_variant	LOW	MPN017	p.Leu162Leu	gene
618	p2_2_S1	2	18519	5.22846e-15	97	96	1	1.04167	C	G	synonymous_variant	LOW	MPN017	p.Pro157Pro	gene
619	p2_2_S1	2	18534	4.51322e-15	107	106	1	0.943396	GA	AT	missense_variant	MODERATE	MPN017	p.Val152Asp	gene
620	p2_2_S1	2	18543	0	108	107	1	0.934579	A	C	synonymous_variant	LOW	MPN017	p.Gly149Gly	gene
621	p2_2_S1	2	18562	0	93	92	1	1.08696	TTGTTGGTG	ATGTAGGTA	missense_variant	MODERATE	MPN017	p.AsnLys142TyrMet	gene
622	p2_2_S1	2	18588	5.40174e-15	99	96	3	3.125	TTCTT	TACAG	missense_variant	MODERATE	MPN017	p.LysGlu133ThrVal	gene
623	p2_2_S1	2	18597	4.98762e-15	102	100	2	2	AAT	GAC	missense_variant	MODERATE	MPN017	p.Ile131Val	gene
624	p2_2_S1	2	18604	1.82342e-15	96	95	1	1.05263	A	G	missense_variant	MODERATE	MPN017	p.Val129Ala	gene
625	p2_2_S1	2	18626	3.82741e-15	107	105	2	1.90476	TAATGG	AAACGC	missense_variant	MODERATE	MPN017	p.ProIleArg120ArgValTrp	gene
626	p2_2_S1	2	18633	2.17751e-15	108	107	1	0.934579	T	C	synonymous_variant	LOW	MPN017	p.Leu119Leu	gene
627	p2_2_S1	2	18653	1.25862e-15	100	98	2	2.04082	AGTAA	GGTAG	synonymous_variant	LOW	MPN017	p.114	gene
628	p2_2_S1	2	18675	0	85	84	1	1.19048	ATCA	TTCT	missense_variant	MODERATE	MPN017	p.Asp105Glu	gene
629	p2_2_S1	2	18700	9.71908e-15	89	86	3	3.48837	T	A	missense_variant	MODERATE	MPN017	p.Gln97Leu	gene
630	p2_2_S1	2	18719	1.31889e-15	110	109	1	0.917431	C	G	missense_variant	MODERATE	MPN017	p.Val91Leu	gene
631	p2_2_S1	2	18755	2.46379e-15	99	98	1	1.02041	CAG	GAC	missense_variant	MODERATE	MPN017	p.ThrAsp78SerHis	gene
632	p2_2_S1	2	18765	9.34428e-16	95	93	2	2.15054	T	C	synonymous_variant	LOW	MPN017	p.Gln75Gln	gene
633	p2_2_S1	2	18772	4.05295e-15	77	74	3	4.05405	A	G	missense_variant	MODERATE	MPN017	p.Ile73Thr	gene
634	p2_2_S1	2	18773	0	81	80	1	1.25	TTTTT	CTTTC	missense_variant	MODERATE	MPN017	p.Ile73Val	gene
635	p2_2_S1	2	18786	0	81	79	2	2.53165	T	C	synonymous_variant	LOW	MPN017	p.Glu68Glu	gene
636	p2_2_S1	2	18790	0	79	78	1	1.28205	TTCT	ATCA	missense_variant	MODERATE	MPN017	p.GluLys66ValIle	gene
637	p2_2_S1	2	18804	7.3231e-15	75	74	1	1.35135	T	C	synonymous_variant	LOW	MPN017	p.Glu62Glu	gene
638	p2_2_S1	2	18866	2.93089e-15	63	62	1	1.6129	G	A	missense_variant	MODERATE	MPN017	p.Arg42Cys	gene
639	p2_2_S1	2	18868	0	64	63	1	1.5873	ATAAA	GTAAT	missense_variant	MODERATE	MPN017	p.PheIle40IleThr	gene
640	p2_2_S1	2	18889	0	67	65	2	3.07692	TCAT	GCAG	missense_variant	MODERATE	MPN017	p.AsnAsp33ThrAla	gene
641	p2_2_S1	2	18912	3.29604e-15	58	57	1	1.75439	T	C	synonymous_variant	LOW	MPN017	p.Leu26Leu	gene
642	p2_2_S1	2	18950	1.61647e-15	49	47	2	4.25532	AAAGGA	AGAGGT	missense_variant	MODERATE	MPN017	p.Ile12Asn	gene
643	p2_2_S1	2	18969	9.04528e-16	55	54	1	1.85185	TTGCT	ATGCA	missense_variant	MODERATE	MPN017	p.LysGln6MetHis	gene
644	p2_2_S1	2	18978	0	57	56	1	1.78571	ATCAA	CTCAC	missense_variant	MODERATE	MPN017	p.PheAsp3CysGlu	gene
645	p2_2_S1	2	18998	5.34123e-15	45	44	1	2.27273	TTGTT	ATGTA	upstream_gene_variant	MODIFIER	MPN012	c.-4737_-4733delAACAAinsTACAT	intergenic
646	p2_2_S1	2	19004	0	43	41	2	4.87805	T	A	upstream_gene_variant	MODIFIER	MPN012	c.-4739A>T	intergenic
647	p2_2_S1	2	19045	0	49	48	1	2.08333	TAT	AAA	upstream_gene_variant	MODIFIER	MPN012	c.-4782_-4780delATAinsTTT	intergenic
648	p2_2_S1	2	19070	3.43565e-15	58	57	1	1.75439	TTAA	ATAG	upstream_gene_variant	MODIFIER	MPN012	c.-4808_-4805delTTAAinsCTAT	intergenic
649	p2_2_S1	2	19172	0	80	78	2	2.5641	C	T	upstream_gene_variant	MODIFIER	MPN012	c.-4907G>A	intergenic
650	p2_2_S1	2	19186	0	81	80	1	1.25	C	A	upstream_gene_variant	MODIFIER	MPN012	c.-4921G>T	intergenic
651	p2_2_S1	2	19199	4.67332e-16	82	81	1	1.23457	GGG	AGA	upstream_gene_variant	MODIFIER	MPN012	c.-4936_-4934delCCCinsTCT	intergenic
652	p2_2_S1	2	19238	2.56173e-15	51	50	1	2	A	G	upstream_gene_variant	MODIFIER	MPN012	c.-4973T>C	intergenic
653	p2_2_S1	2	19283	0	53	52	1	1.92308	GCTAG	ACTAA	upstream_gene_variant	MODIFIER	MPN015	c.-1948_-1944delCTAGCinsTTAGT	intergenic
654	p2_2_S1	2	19294	7.17195e-15	49	48	1	2.08333	AGCG	TACA	upstream_gene_variant	MODIFIER	MPN015	c.-1958_-1955delCGCTinsTGTA	intergenic
655	p2_2_S1	2	19303	2.32795e-15	56	55	1	1.81818	ATA	GTG	upstream_gene_variant	MODIFIER	MPN015	c.-1966_-1964delTATinsCAC	intergenic
656	p2_2_S1	2	19319	0	48	47	1	2.12766	G	A	upstream_gene_variant	MODIFIER	MPN015	c.-1980C>T	intergenic
657	p2_2_S1	2	19324	3.57126e-15	49	48	1	2.08333	TATGG	AATGA	missense_variant	MODERATE	MPN018	p.Gly2Ser	gene
658	p2_2_S1	2	19339	2.44496e-15	54	53	1	1.88679	AAAA	TAAT	missense_variant	MODERATE	MPN018	p.LeuLys5PheAsn	gene
659	p2_2_S1	2	19350	5.65271e-16	46	45	1	2.22222	ACAGGAAAATAAGAACAG	TCACGAATTTTAGTTCAT	missense_variant	MODERATE	MPN018	p.AsnArgLysIleArgThrAla9IleThrAsnPheSerSerSer	gene
660	p2_2_S1	2	19370	2.19634e-15	56	55	1	1.81818	T	G	missense_variant	MODERATE	MPN018	p.Leu16Val	gene
661	p2_2_S1	2	19404	2.70464e-15	69	68	1	1.47059	TTATT	ATACA	missense_variant	MODERATE	MPN018	p.IleIle27AsnThr	gene
662	p2_2_S1	2	19427	6.07248e-15	56	54	2	3.7037	TCCTTTT	ACCTCTC	missense_variant	MODERATE	MPN018	p.SerPhe35ThrSer	gene
663	p2_2_S1	2	19447	0	72	71	1	1.40845	TGC	AGT	missense_variant	MODERATE	MPN018	p.Ala42Val	gene
664	p2_2_S1	2	19466	7.60962e-15	57	56	1	1.78571	G	A	missense_variant	MODERATE	MPN018	p.Val48Ile	gene
665	p2_2_S1	2	19481	2.06473e-15	54	53	1	1.88679	AAAGA	TAAGG	stop_gained	HIGH	MPN018	p.LysGlu53*	gene
666	p2_2_S1	2	19496	1.80835e-15	63	62	1	1.6129	GAGGGA	AACGGT	missense_variant	MODERATE	MPN018	p.Glu58Asn	gene
667	p2_2_S1	2	19560	4.93464e-15	60	58	2	3.44828	A	G	missense_variant	MODERATE	MPN018	p.Gln79Arg	gene
668	p2_2_S1	2	19570	0	58	56	2	3.57143	A	G	synonymous_variant	LOW	MPN018	p.Leu82Leu	gene
669	p2_2_S1	2	19589	0	64	63	1	1.5873	T	A	missense_variant	MODERATE	MPN018	p.Leu89Ile	gene
670	p2_2_S1	2	19610	1.80082e-15	53	52	1	1.92308	TTTGG	ATTGA	missense_variant	MODERATE	MPN018	p.PheGly96IleGlu	gene
671	p2_2_S1	2	19692	0	62	61	1	1.63934	T	C	missense_variant	MODERATE	MPN018	p.Ile123Thr	gene
672	p2_2_S1	2	19724	0	70	68	2	2.94118	T	A	missense_variant	MODERATE	MPN018	p.Tyr134Asn	gene
673	p2_2_S1	2	19749	3.93312e-15	68	67	1	1.49254	GGTT	AGTA	stop_gained	HIGH	MPN018	p.ArgLeu142*	gene
674	p2_2_S1	2	19795	1.38669e-15	66	64	2	3.125	TTTGCGGT	ATAGTGGT	stop_gained	HIGH	MPN018	p.PheLeuArg157*	gene
675	p2_2_S1	2	19816	5.46225e-15	66	65	1	1.53846	A	G	synonymous_variant	LOW	MPN018	p.Ala164Ala	gene
676	p2_2_S1	2	19822	0	64	63	1	1.5873	CTTGT	GTTGA	missense_variant	MODERATE	MPN018	p.PheLeuPhe166LeuLeuIle	gene
677	p2_2_S1	2	19832	0	65	64	1	1.5625	GGG	AGA	missense_variant	MODERATE	MPN018	p.Gly170Arg	gene
678	p2_2_S1	2	19869	1.65367e-15	62	61	1	1.63934	TGTC	AGTT	missense_variant	MODERATE	MPN018	p.MetSer182LysLeu	gene
679	p2_2_S1	2	19875	4.93464e-15	60	58	2	3.44828	T	C	missense_variant	MODERATE	MPN018	p.Ile184Thr	gene
680	p2_2_S1	2	19943	0	57	55	2	3.63636	TTATT	ATATA	missense_variant	MODERATE	MPN018	p.LeuPhe207IleTyr	gene
681	p2_2_S1	2	19959	0	56	55	1	1.81818	A	G	missense_variant	MODERATE	MPN018	p.Gln212Arg	gene
682	p2_2_S1	2	19988	6.69756e-15	56	54	2	3.7037	G	A	missense_variant	MODERATE	MPN018	p.Val222Met	gene
683	p2_2_S1	2	20033	7.30756e-15	75	74	1	1.35135	T	C	synonymous_variant	LOW	MPN018	p.Leu237Leu	gene
684	p2_2_S1	2	20034	4.03836e-15	74	73	1	1.36986	TAAA	AAAT	stop_gained	HIGH	MPN018	p.LeuLys237*	gene
685	p2_2_S1	2	20057	0	72	70	2	2.85714	T	C	missense_variant	MODERATE	MPN018	p.Phe245Leu	gene
686	p2_2_S1	2	20075	8.55323e-16	85	84	1	1.19048	A	T	missense_variant	MODERATE	MPN018	p.Arg251Trp	gene
687	p2_2_S1	2	20097	0	80	79	1	1.26582	ATTCC	TTTCT	missense_variant	MODERATE	MPN018	p.Asn258Ile	gene
688	p2_2_S1	2	20142	3.68403e-15	70	69	1	1.44928	T	C	missense_variant	MODERATE	MPN018	p.Phe273Ser	gene
689	p2_2_S1	2	20156	0	90	89	1	1.1236	A	T	missense_variant	MODERATE	MPN018	p.Ile278Phe	gene
690	p2_2_S1	2	20170	2.39975e-15	87	86	1	1.16279	GCTTTT	AGTTTA	stop_gained	HIGH	MPN018	p.LeuLeu283*	gene
691	p2_2_S1	2	20178	0	90	89	1	1.1236	TCTT	ACTA	missense_variant	MODERATE	MPN018	p.ValPhe285AspTyr	gene
692	p2_2_S1	2	20208	0	104	103	1	0.970874	ATC	GTT	missense_variant	MODERATE	MPN018	p.AspPro295GlySer	gene
693	p2_2_S1	2	20211	4.54383e-17	100	99	1	1.0101	C	T	missense_variant	MODERATE	MPN018	p.Pro296Leu	gene
694	p2_2_S1	2	20233	0	91	90	1	1.11111	TAGA	CAGG	synonymous_variant	LOW	MPN018	p.305	gene
695	p2_2_S1	2	20246	0	84	82	2	2.43902	TTTGCT	TATGCC	missense_variant	MODERATE	MPN018	p.Phe308Tyr	gene
696	p2_2_S1	2	20276	1.24543e-16	78	77	1	1.2987	G	T	missense_variant	MODERATE	MPN018	p.Val318Phe	gene
697	p2_2_S1	2	20311	3.81964e-15	61	60	1	1.66667	C	A	synonymous_variant	LOW	MPN018	p.Val329Val	gene
698	p2_2_S1	2	20347	0	66	65	1	1.53846	TAAG	CAAC	missense_variant	MODERATE	MPN018	p.Lys342Asn	gene
699	p2_2_S1	2	20357	0	53	52	1	1.92308	T	C	synonymous_variant	LOW	MPN018	p.Leu345Leu	gene
700	p2_2_S1	2	20363	1.77821e-15	53	52	1	1.92308	AAACC	TAACT	stop_gained	HIGH	MPN018	p.LysPro347*	gene
701	p2_2_S1	2	20425	3.08156e-15	54	53	1	1.88679	C	T	synonymous_variant	LOW	MPN018	p.Phe367Phe	gene
702	p2_2_S1	2	20426	7.60232e-15	57	56	1	1.78571	A	T	stop_gained	HIGH	MPN018	p.Lys368*	gene
703	p2_2_S1	2	20431	0	59	58	1	1.72414	CGTG	TGTA	synonymous_variant	LOW	MPN018	p.371	gene
704	p2_2_S1	2	20435	1.33652e-14	54	53	1	1.88679	GCCTTTGGGT	ACCAAAGGGA	missense_variant	MODERATE	MPN018	p.AlaPheGlyLeu371ThrLysGlyIle	gene
705	p2_2_S1	2	20447	0	56	55	1	1.81818	GGT	AGA	missense_variant	MODERATE	MPN018	p.Gly375Arg	gene
706	p2_2_S1	2	20457	0	48	47	1	2.12766	AAAA	TAAT	missense_variant	MODERATE	MPN018	p.GluAsn378ValIle	gene
707	p2_2_S1	2	20463	1.57857e-15	49	48	1	2.08333	GGGACT	AGAACA	missense_variant	MODERATE	MPN018	p.ArgAspPhe380GlnAsnIle	gene
708	p2_2_S1	2	20477	5.53735e-16	51	50	1	2	G	A	missense_variant	MODERATE	MPN018	p.Asp385Asn	gene
709	p2_2_S1	2	20489	0	42	41	1	2.43902	AA	TT	missense_variant	MODERATE	MPN018	p.Lys389Leu	gene
710	p2_2_S1	2	20497	9.4408e-17	35	34	1	2.94118	GGCCGGTAA	CGCTGGTTT	missense_variant	MODERATE	MPN018	p.GluAlaGlyLys391AspAlaGlyLeu	gene
711	p2_2_S1	2	20528	3.83471e-15	61	60	1	1.66667	A	T	missense_variant	MODERATE	MPN018	p.Thr402Ser	gene
712	p2_2_S1	2	20533	3.81211e-15	58	57	1	1.75439	TTCGG	ATCGA	missense_variant	MODERATE	MPN018	p.Gly405Ser	gene
713	p2_2_S1	2	20547	0	68	67	1	1.49254	TAA	AAG	stop_gained	HIGH	MPN018	p.LeuIle408*	gene
714	p2_2_S1	2	20578	4.14595e-16	60	59	1	1.69492	A	C	missense_variant	MODERATE	MPN018	p.Glu418Asp	gene
715	p2_2_S1	2	20595	7.76453e-16	55	54	1	1.85185	T	C	missense_variant	MODERATE	MPN018	p.Ile424Thr	gene
716	p2_2_S1	2	20638	5.97455e-15	52	51	1	1.96078	T	C	synonymous_variant	LOW	MPN018	p.Tyr438Tyr	gene
717	p2_2_S1	2	20670	0	52	51	1	1.96078	AAAA	TAAT	missense_variant	MODERATE	MPN018	p.GlnAsn449LeuIle	gene
718	p2_2_S1	2	20683	1.29605e-15	58	57	1	1.75439	T	A	missense_variant	MODERATE	MPN018	p.Phe453Leu	gene
719	p2_2_S1	2	20685	0	57	56	1	1.78571	A	G	missense_variant	MODERATE	MPN018	p.Lys454Arg	gene
720	p2_2_S1	2	20701	2.93089e-15	63	62	1	1.6129	C	A	synonymous_variant	LOW	MPN018	p.Ser459Ser	gene
721	p2_2_S1	2	20706	0	67	66	1	1.51515	TTAAGA	CTTAGT	stop_gained	HIGH	MPN018	p.IleLysIle461*	gene
722	p2_2_S1	2	20725	0	76	75	1	1.33333	CAGG	TAGA	synonymous_variant	LOW	MPN018	p.469	gene
723	p2_2_S1	2	20729	0	73	72	1	1.38889	GAA	CAT	missense_variant	MODERATE	MPN018	p.Glu469His	gene
724	p2_2_S1	2	20738	3.6765e-15	70	69	1	1.44928	A	T	stop_gained	HIGH	MPN018	p.Lys472*	gene
725	p2_2_S1	2	20743	0	73	72	1	1.38889	CGAAC	TGAAG	missense_variant	MODERATE	MPN018	p.Pro475Ala	gene
726	p2_2_S1	2	20753	0	71	70	1	1.42857	AGCAA	TGCTT	missense_variant	MODERATE	MPN018	p.SerLys477CysLeu	gene
727	p2_2_S1	2	20767	0	77	76	1	1.31579	TGC	AGT	missense_variant	MODERATE	MPN018	p.Ala482Val	gene
728	p2_2_S1	2	20784	1.88345e-15	83	82	1	1.21951	CTGCCA	TTGCTT	missense_variant	MODERATE	MPN018	p.AlaAlaIle487ValAlaPhe	gene
729	p2_2_S1	2	20795	0	83	82	1	1.21951	TGTGCT	AGTGTA	missense_variant	MODERATE	MPN018	p.CysAla491SerVal	gene
730	p2_2_S1	2	20808	0	102	101	1	0.990099	TCAT	ACAA	missense_variant	MODERATE	MPN018	p.PheIle495TyrAsn	gene
731	p2_2_S1	2	20813	0	99	98	1	1.02041	GAAA	AGTT	stop_gained	HIGH	MPN018	p.GluLys497*	gene
732	p2_2_S1	2	20820	0	98	97	1	1.03093	TCAGC	ACAGT	missense_variant	MODERATE	MPN018	p.Phe499Tyr	gene
733	p2_2_S1	2	20838	0	77	76	1	1.31579	A	G	missense_variant	MODERATE	MPN018	p.His505Arg	gene
734	p2_2_S1	2	20889	4.39221e-15	67	65	2	3.07692	TCGCC	CCGTG	missense_variant	MODERATE	MPN018	p.ValAla522AlaVal	gene
735	p2_2_S1	2	20909	0	77	76	1	1.31579	ATTACTA	GTAACTG	missense_variant	MODERATE	MPN018	p.IleThrLys529ValThrGlu	gene
736	p2_2_S1	2	20924	0	80	78	2	2.5641	ATCTTAGTGT	ACCTAAGTGT	stop_gained	HIGH	MPN018	p.IleLeu534*	gene
737	p2_2_S1	2	20963	0	72	71	1	1.40845	T	C	synonymous_variant	LOW	MPN018	p.Leu547Leu	gene
738	p2_2_S1	2	21123	3.06061e-17	75	74	1	1.35135	AGA	TGT	missense_variant	MODERATE	MPN018	p.GlnSer600LeuCys	gene
739	p2_2_S1	2	21134	0	84	82	2	2.43902	A	T	missense_variant	MODERATE	MPN018	p.Ile604Phe	gene
740	p2_2_S1	2	21148	1.47366e-14	90	88	2	2.27273	G	A	stop_gained	HIGH	MPN019	p.Trp14*	gene
741	p2_2_S1	2	21160	9.84104e-17	87	86	1	1.16279	AAA	GAG	missense_variant	MODERATE	MPN018	p.Lys613Arg	gene
742	p2_2_S1	2	21233	1.67251e-15	80	79	1	1.26582	AAT	GAC	missense_variant	MODERATE	MPN019	p.Ile43Thr	gene
743	p2_2_S1	2	21276	0	82	81	1	1.23457	G	C	missense_variant	MODERATE	MPN019	p.Val57Leu	gene
744	p2_2_S1	2	21284	1.89876e-15	74	73	1	1.36986	C	T	synonymous_variant	LOW	MPN019	p.Val59Val	gene
745	p2_2_S1	2	21332	0	66	65	1	1.53846	GGCCCA	AGCTCT	missense_variant	MODERATE	MPN019	p.Gln77Leu	gene
746	p2_2_S1	2	21425	0	70	68	2	2.94118	G	C	synonymous_variant	LOW	MPN019	p.Pro106Pro	gene
747	p2_2_S1	2	21431	0	67	65	2	3.07692	G	A	missense_variant	MODERATE	MPN019	p.Met108Ile	gene
748	p2_2_S1	2	21487	0	72	71	1	1.40845	G	A	missense_variant	MODERATE	MPN019	p.Ser127Asn	gene
749	p2_2_S1	2	21524	5.24377e-15	97	96	1	1.04167	G	A	synonymous_variant	LOW	MPN019	p.Leu139Leu	gene
750	p2_2_S1	2	21551	3.31511e-15	110	109	1	0.917431	C	T	synonymous_variant	LOW	MPN019	p.Arg148Arg	gene
751	p2_2_S1	2	21556	0	99	98	1	1.02041	A	G	missense_variant	MODERATE	MPN019	p.Lys150Arg	gene
752	p2_2_S1	2	21578	3.38292e-15	88	87	1	1.14943	T	C	synonymous_variant	LOW	MPN019	p.Ser157Ser	gene
753	p2_2_S1	2	21652	0	77	75	2	2.66667	TTAA	CTAG	missense_variant	MODERATE	MPN019	p.IleAsn182ThrSer	gene
754	p2_2_S1	2	21714	0	71	70	1	1.42857	A	G	missense_variant	MODERATE	MPN019	p.Thr203Ala	gene
755	p2_2_S1	2	21777	1.31112e-15	58	57	1	1.75439	G	A	missense_variant	MODERATE	MPN019	p.Ala224Thr	gene
756	p2_2_S1	2	21809	0	53	52	1	1.92308	GAAG	AAAA	synonymous_variant	LOW	MPN019	p.236	gene
757	p2_2_S1	2	21847	0	48	47	1	2.12766	TAGGGGAC	CAGGAGAT	missense_variant	MODERATE	MPN019	p.Leu247Ser	gene
758	p2_2_S1	2	21875	0	49	48	1	2.08333	A	G	synonymous_variant	LOW	MPN019	p.Glu256Glu	gene
759	p2_2_S1	2	21896	0	53	52	1	1.92308	A	G	synonymous_variant	LOW	MPN019	p.Val263Val	gene
760	p2_2_S1	2	21936	1.92489e-15	44	43	1	2.32558	TTTGA	ATTAT	missense_variant	MODERATE	MPN019	p.PheAsp277IleIle	gene
761	p2_2_S1	2	21955	1.18434e-14	53	48	5	10.4167	CGATGGT	TGAAGGA	missense_variant	MODERATE	MPN019	p.ProMetVal283LeuLysAsp	gene
762	p2_2_S1	2	21962	0	62	61	1	1.63934	T	C	synonymous_variant	LOW	MPN019	p.Val285Val	gene
763	p2_2_S1	2	21994	0	71	70	1	1.42857	T	G	missense_variant	MODERATE	MPN019	p.Val296Gly	gene
764	p2_2_S1	2	22017	0	77	76	1	1.31579	TTTAT	ATTAC	missense_variant	MODERATE	MPN019	p.PheIle304IleThr	gene
765	p2_2_S1	2	22062	0	81	78	3	3.84615	GCCTT	GGCTA	missense_variant	MODERATE	MPN019	p.AlaPhe319GlyTyr	gene
766	p2_2_S1	2	22084	0	81	80	1	1.25	C	G	missense_variant	MODERATE	MPN019	p.Pro326Arg	gene
767	p2_2_S1	2	22117	0	72	71	1	1.40845	TTATGCTGTC	CAATGTTGTG	missense_variant	MODERATE	MPN019	p.PheMetLeuSer337SerMetLeuCys	gene
768	p2_2_S1	2	22135	0	81	79	2	2.53165	CGGCCTT	TGGTCTA	stop_gained	HIGH	MPN019	p.AlaAlaLeu343*	gene
769	p2_2_S1	2	22157	5.75583e-15	77	74	3	4.05405	CCCTT	CTCTC	missense_variant	MODERATE	MPN019	p.Pro351Ser	gene
770	p2_2_S1	2	22163	2.64484e-15	81	80	1	1.25	A	T	missense_variant	MODERATE	MPN019	p.Leu352Phe	gene
771	p2_2_S1	2	22175	0	75	74	1	1.35135	TAGCT	AAGCA	missense_variant	MODERATE	MPN019	p.PheSerLeu356LeuSerMet	gene
772	p2_2_S1	2	22187	3.02129e-15	76	75	1	1.33333	C	T	synonymous_variant	LOW	MPN019	p.Asn360Asn	gene
773	p2_2_S1	2	22211	4.92735e-15	60	58	2	3.44828	T	A	missense_variant	MODERATE	MPN019	p.Ser368Arg	gene
774	p2_2_S1	2	22215	3.42082e-15	58	57	1	1.75439	GA	AT	missense_variant	MODERATE	MPN019	p.Glu370Met	gene
775	p2_2_S1	2	22226	0	58	56	2	3.57143	CAAGA	TATGA	missense_variant	MODERATE	MPN019	p.Lys374Met	gene
776	p2_2_S1	2	22243	2.41129e-15	60	59	1	1.69492	A	T	missense_variant	MODERATE	MPN019	p.Glu379Val	gene
777	p2_2_S1	2	22250	0	62	61	1	1.63934	C	T	synonymous_variant	LOW	MPN019	p.Pro381Pro	gene
778	p2_2_S1	2	22253	0	59	58	1	1.72414	A	T	missense_variant	MODERATE	MPN019	p.Gln382His	gene
779	p2_2_S1	2	22274	2.93842e-15	63	62	1	1.6129	G	A	synonymous_variant	LOW	MPN019	p.Lys389Lys	gene
780	p2_2_S1	2	22275	0	56	55	1	1.81818	T	C	synonymous_variant	LOW	MPN019	p.Leu390Leu	gene
781	p2_2_S1	2	22330	0	72	70	2	2.85714	C	A	missense_variant	MODERATE	MPN019	p.Ala408Glu	gene
782	p2_2_S1	2	22414	0	74	73	1	1.36986	A	G	missense_variant	MODERATE	MPN019	p.Lys436Arg	gene
783	p2_2_S1	2	22426	1.00977e-15	76	75	1	1.33333	T	C	missense_variant	MODERATE	MPN019	p.Ile440Thr	gene
784	p2_2_S1	2	22441	0	75	74	1	1.35135	A	G	missense_variant	MODERATE	MPN019	p.Lys445Arg	gene
785	p2_2_S1	2	22601	0	71	69	2	2.89855	C	T	synonymous_variant	LOW	MPN019	p.Ala498Ala	gene
786	p2_2_S1	2	22612	3.43918e-15	76	75	1	1.33333	AAA	TAT	missense_variant	MODERATE	MPN019	p.GluIle502ValPhe	gene
787	p2_2_S1	2	22618	0	80	79	1	1.26582	T	A	missense_variant	MODERATE	MPN019	p.Ile504Lys	gene
788	p2_2_S1	2	22641	3.75984e-15	83	82	1	1.21951	G	T	missense_variant	MODERATE	MPN019	p.Ala512Ser	gene
789	p2_2_S1	2	22649	0	80	79	1	1.26582	C	T	synonymous_variant	LOW	MPN019	p.Asp514Asp	gene
790	p2_2_S1	2	22667	0	73	71	2	2.8169	C	A	synonymous_variant	LOW	MPN019	p.Pro520Pro	gene
791	p2_2_S1	2	22668	0	69	68	1	1.47059	CA	TG	missense_variant	MODERATE	MPN019	p.Gln521Trp	gene
792	p2_2_S1	2	22684	0	59	58	1	1.72414	T	A	missense_variant	MODERATE	MPN019	p.Phe526Tyr	gene
793	p2_2_S1	2	22691	0	62	61	1	1.63934	CAA	TAG	missense_variant	MODERATE	MPN019	p.Asn529Ser	gene
794	p2_2_S1	2	22755	2.79528e-15	72	71	1	1.40845	C	T	missense_variant	MODERATE	MPN019	p.Arg550Cys	gene
795	p2_2_S1	2	22779	1.46933e-15	67	66	1	1.51515	GATGA	AATGT	missense_variant	MODERATE	MPN019	p.AspGlu558AsnVal	gene
796	p2_2_S1	2	22825	0	65	64	1	1.5625	AACAA	TACAT	missense_variant	MODERATE	MPN019	p.GlnGln573LeuHis	gene
797	p2_2_S1	2	22866	2.96856e-15	70	68	2	2.94118	A	T	missense_variant	MODERATE	MPN019	p.Ile587Leu	gene
798	p2_2_S1	2	22869	0	61	60	1	1.66667	ATATCCCA	TTTTCCTT	missense_variant	MODERATE	MPN019	p.IleSerHis588PheSerPhe	gene
799	p2_2_S1	2	22878	0	62	61	1	1.63934	C	G	missense_variant	MODERATE	MPN019	p.Arg591Gly	gene
800	p2_2_S1	2	22911	2.44496e-15	54	53	1	1.88679	ATTGT	TTTGC	missense_variant	MODERATE	MPN019	p.IleVal602PheAla	gene
801	p2_2_S1	2	22937	0	52	51	1	1.96078	G	A	synonymous_variant	LOW	MPN019	p.Leu610Leu	gene
802	p2_2_S1	2	22946	0	57	56	1	1.78571	T	A	synonymous_variant	LOW	MPN019	p.Gly613Gly	gene
803	p2_2_S1	2	22958	1.36079e-16	57	54	3	5.55556	ATTA	GTTT	missense_variant	MODERATE	MPN019	p.Leu618Phe	gene
804	p2_2_S1	2	22987	0	56	55	1	1.81818	GAT	AAA	missense_variant	MODERATE	MPN019	p.ArgLeu627GlnIle	gene
805	p2_2_S1	2	23000	0	60	59	1	1.69492	TGCT	AGCA	synonymous_variant	LOW	MPN019	p.633	gene
806	p2_2_S1	2	23012	7.60232e-15	57	56	1	1.78571	A	T	upstream_gene_variant	MODIFIER	MPN016	c.-4807T>A	intergenic
807	p2_2_S1	2	23029	7.83751e-16	55	54	1	1.85185	T	C	missense_variant	MODERATE	MPN020	p.Ile3Thr	gene
808	p2_2_S1	2	23058	7.60232e-15	57	56	1	1.78571	A	C	missense_variant	MODERATE	MPN020	p.Thr13Pro	gene
809	p2_2_S1	2	23059	0	58	57	1	1.75439	C	T	missense_variant	MODERATE	MPN020	p.Thr13Met	gene
810	p2_2_S1	2	23072	6.62245e-15	52	51	1	1.96078	CGAAG	TGAAA	missense_variant	MODERATE	MPN020	p.Ala19Thr	gene
811	p2_2_S1	2	23124	1.25862e-15	74	73	1	1.36986	CTCAA	GTCAG	missense_variant	MODERATE	MPN020	p.LeuAsn35ValSer	gene
812	p2_2_S1	2	23131	2.03083e-15	74	73	1	1.36986	AGG	GGA	missense_variant	MODERATE	MPN020	p.LysAla37ArgThr	gene
813	p2_2_S1	2	23135	0	71	70	1	1.42857	GCGGG	ACAGA	missense_variant	MODERATE	MPN020	p.ArgGly39GlnSer	gene
814	p2_2_S1	2	23215	0	66	65	1	1.53846	A	G	missense_variant	MODERATE	MPN020	p.Lys65Arg	gene
815	p2_2_S1	2	23295	2.71688e-16	69	68	1	1.47059	T	G	missense_variant	MODERATE	MPN020	p.Ser92Ala	gene
816	p2_2_S1	2	23325	0	75	74	1	1.35135	TTT	ATA	missense_variant	MODERATE	MPN020	p.Phe102Ile	gene
817	p2_2_S1	2	23339	7.16442e-15	84	83	1	1.20482	T	A	missense_variant	MODERATE	MPN020	p.Cys106Trp	gene
818	p2_2_S1	2	23359	0	87	86	1	1.16279	T	C	missense_variant	MODERATE	MPN020	p.Ile113Thr	gene
819	p2_2_S1	2	23401	5.22846e-15	97	96	1	1.04167	T	C	missense_variant	MODERATE	MPN020	p.Phe127Ser	gene
820	p2_2_S1	2	23412	0	89	88	1	1.13636	T	C	missense_variant	MODERATE	MPN020	p.Phe131Leu	gene
821	p2_2_S1	2	23428	3.1496e-15	94	93	1	1.07527	ATA	TTT	stop_gained	HIGH	MPN020	p.AspLys136*	gene
822	p2_2_S1	2	23494	1.89876e-15	74	73	1	1.36986	T	C	missense_variant	MODERATE	MPN020	p.Leu158Pro	gene
823	p2_2_S1	2	23610	2.19634e-15	56	55	1	1.81818	C	T	missense_variant	MODERATE	MPN020	p.Arg197Cys	gene
824	p2_2_S1	2	23638	0	49	46	3	6.52174	GTTTTTTAAAGGA	GTTTTTTAATGGT	missense_variant	MODERATE	MPN020	p.LysGlu209MetVal	gene
825	p2_2_S1	2	23684	0	64	63	1	1.5873	C	G	synonymous_variant	LOW	MPN020	p.Val221Val	gene
826	p2_2_S1	2	23688	5.60515e-15	57	56	1	1.78571	A	T	missense_variant	MODERATE	MPN020	p.Asn223Tyr	gene
827	p2_2_S1	2	23689	7.24752e-15	62	61	1	1.63934	A	T	missense_variant	MODERATE	MPN020	p.Asn223Ile	gene
828	p2_2_S1	2	23733	1.15668e-15	67	66	1	1.51515	A	T	stop_gained	HIGH	MPN020	p.Lys238*	gene
829	p2_2_S1	2	23778	1.16421e-15	67	66	1	1.51515	G	A	missense_variant	MODERATE	MPN020	p.Val253Ile	gene
830	p2_2_S1	2	23819	0	64	63	1	1.5873	T	G	missense_variant	MODERATE	MPN020	p.Ile266Met	gene
831	p2_2_S1	2	23830	5.83164e-15	61	60	1	1.66667	C	A	stop_gained	HIGH	MPN020	p.Ser270*	gene
832	p2_2_S1	2	23838	4.04566e-15	65	64	1	1.5625	C	T	synonymous_variant	LOW	MPN020	p.Leu273Leu	gene
833	p2_2_S1	2	23863	3.68403e-15	70	69	1	1.44928	T	C	missense_variant	MODERATE	MPN020	p.Phe281Ser	gene
834	p2_2_S1	2	23869	2.63919e-16	69	68	1	1.47059	A	G	missense_variant	MODERATE	MPN020	p.Tyr283Cys	gene
835	p2_2_S1	2	24031	0	89	88	1	1.13636	A	G	missense_variant	MODERATE	MPN020	p.Asp337Gly	gene
836	p2_2_S1	2	24078	0	77	76	1	1.31579	A	G	missense_variant	MODERATE	MPN020	p.Asn353Asp	gene
837	p2_2_S1	2	24098	3.88768e-15	74	73	1	1.36986	A	G	synonymous_variant	LOW	MPN020	p.Thr359Thr	gene
838	p2_2_S1	2	24111	3.68403e-15	70	69	1	1.44928	C	G	missense_variant	MODERATE	MPN020	p.Pro364Ala	gene
839	p2_2_S1	2	24121	0	81	80	1	1.25	A	T	missense_variant	MODERATE	MPN020	p.Tyr367Phe	gene
840	p2_2_S1	2	24166	0	59	58	1	1.72414	TGTTTT	AGATTA	stop_gained	HIGH	MPN020	p.LeuPheTyr382*	gene
841	p2_2_S1	2	24209	0	64	63	1	1.5873	TGAT	AGAC	missense_variant	MODERATE	MPN020	p.Phe396Leu	gene
842	p2_2_S1	2	24219	3.28874e-15	67	66	1	1.51515	TACTT	CACTC	missense_variant	MODERATE	MPN020	p.TyrPhe400HisSer	gene
843	p2_2_S1	2	24229	8.63092e-16	64	63	1	1.5873	AGTTTGAACACCTACCGAT	GGTTCAATTTCCTTCCGTC	missense_variant	MODERATE	MPN020	p.LysPheGluHisLeuProIle403ArgPheAsnPheLeuProSer	gene
844	p2_2_S1	2	24297	0	55	54	1	1.85185	A	G	missense_variant	MODERATE	MPN020	p.Met426Val	gene
845	p2_2_S1	2	24343	0	61	60	1	1.66667	A	C	missense_variant	MODERATE	MPN020	p.His441Pro	gene
846	p2_2_S1	2	24358	6.37078e-16	64	63	1	1.5873	A	T	missense_variant	MODERATE	MPN020	p.His446Leu	gene
847	p2_2_S1	2	24371	0	68	67	1	1.49254	T	A	synonymous_variant	LOW	MPN020	p.Ser450Ser	gene
848	p2_2_S1	2	24401	0	57	55	2	3.63636	ACAAATTAA	TCAATTTAA	missense_variant	MODERATE	MPN020	p.LysGlnIle460AsnGlnPhe	gene
849	p2_2_S1	2	24412	1.31112e-15	58	57	1	1.75439	T	A	stop_gained	HIGH	MPN020	p.Leu464*	gene
850	p2_2_S1	2	24430	2.6785e-15	51	50	1	2	CGGT	TGGA	missense_variant	MODERATE	MPN020	p.AlaVal470ValAsp	gene
851	p2_2_S1	2	24435	0	50	49	1	2.04082	G	A	missense_variant	MODERATE	MPN020	p.Glu472Lys	gene
852	p2_2_S1	2	24464	3.82741e-15	56	55	1	1.81818	CGCT	TGCA	synonymous_variant	LOW	MPN020	p.483	gene
853	p2_2_S1	2	24534	0	74	73	1	1.36986	AAAGA	TAAGT	stop_gained	HIGH	MPN020	p.LysGlu505*	gene
854	p2_2_S1	2	24565	0	74	73	1	1.36986	ACTTA	TCTTT	missense_variant	MODERATE	MPN020	p.AspLeu515ValPhe	gene
855	p2_2_S1	2	24610	2.93089e-15	63	62	1	1.6129	A	G	missense_variant	MODERATE	MPN020	p.Lys530Arg	gene
856	p2_2_S1	2	24611	0	64	63	1	1.5873	A	G	synonymous_variant	LOW	MPN020	p.Lys530Lys	gene
857	p2_2_S1	2	24612	0	72	70	2	2.85714	T	C	missense_variant	MODERATE	MPN020	p.Tyr531His	gene
858	p2_2_S1	2	24626	0	62	61	1	1.63934	A	G	synonymous_variant	LOW	MPN020	p.Glu535Glu	gene
859	p2_2_S1	2	24640	0	68	67	1	1.49254	T	C	missense_variant	MODERATE	MPN020	p.Phe540Ser	gene
860	p2_2_S1	2	24720	6.41151e-15	74	72	2	2.77778	G	A	missense_variant	MODERATE	MPN020	p.Asp567Asn	gene
861	p2_2_S1	2	24738	6.33311e-16	64	63	1	1.5873	A	T	stop_gained	HIGH	MPN020	p.Lys573*	gene
862	p2_2_S1	2	24746	0	68	67	1	1.49254	T	C	synonymous_variant	LOW	MPN020	p.Ile575Ile	gene
863	p2_2_S1	2	24755	2.92335e-15	72	71	1	1.40845	GCG	ACA	missense_variant	MODERATE	MPN020	p.Arg579His	gene
864	p2_2_S1	2	24763	3.43918e-15	76	75	1	1.33333	ACC	TCT	stop_gained	HIGH	MPN020	p.TyrGln581*	gene
865	p2_2_S1	2	24790	0	77	76	1	1.31579	GCG	ACA	missense_variant	MODERATE	MPN020	p.ArgGly590HisSer	gene
866	p2_2_S1	2	24802	5.53005e-15	79	78	1	1.28205	A	G	missense_variant	MODERATE	MPN020	p.Glu594Gly	gene
867	p2_2_S1	2	24829	6.33311e-16	64	63	1	1.5873	A	G	missense_variant	MODERATE	MPN020	p.Asp603Gly	gene
868	p2_2_S1	2	24877	0	87	86	1	1.16279	A	T	missense_variant	MODERATE	MPN020	p.Asp619Val	gene
869	p2_2_S1	2	24982	0	80	78	2	2.5641	A	T	missense_variant	MODERATE	MPN020	p.Lys654Met	gene
870	p2_2_S1	2	24998	0	98	97	1	1.03093	C	G	missense_variant	MODERATE	MPN020	p.Asn659Lys	gene
871	p2_2_S1	2	25030	0	69	68	1	1.47059	AAAAACTT	TAAGACTC	missense_variant	MODERATE	MPN020	p.GluLys670ValArg	gene
872	p2_2_S1	2	25074	1.15668e-15	67	66	1	1.51515	C	T	missense_variant	MODERATE	MPN020	p.Arg685Cys	gene
873	p2_2_S1	2	25213	3.1642e-16	57	56	1	1.78571	GTA	ATT	missense_variant	MODERATE	MPN020	p.GlyThr731AspSer	gene
874	p2_2_S1	2	25347	2.0492e-15	65	64	1	1.5625	A	T	missense_variant	MODERATE	MPN020	p.Met776Leu	gene
875	p2_2_S1	2	25436	0	76	74	2	2.7027	A	G	synonymous_variant	LOW	MPN020	p.Val805Val	gene
876	p2_2_S1	2	25439	0	81	80	1	1.25	A	G	synonymous_variant	LOW	MPN020	p.Glu806Glu	gene
877	p2_2_S1	2	25440	1.20541e-16	78	77	1	1.2987	T	A	missense_variant	MODERATE	MPN020	p.Leu807Ile	gene
878	p2_2_S1	2	25445	0	76	75	1	1.33333	C	T	synonymous_variant	LOW	MPN020	p.Asn808Asn	gene
879	p2_2_S1	2	25466	5.8241e-15	61	60	1	1.66667	T	C	synonymous_variant	LOW	MPN020	p.Tyr815Tyr	gene
880	p2_2_S1	2	25505	0	39	38	1	2.63158	A	G	synonymous_variant	LOW	MPN020	p.Gln828Gln	gene
881	p2_2_S1	2	25534	0	45	44	1	2.27273	T	G	missense_variant	MODERATE	MPN020	p.Leu838Trp	gene
882	p2_2_S1	2	25645	2.94643e-15	63	62	1	1.6129	T	C	missense_variant	MODERATE	MPN020	p.Ile875Thr	gene
883	p2_2_S1	2	25652	0	63	61	2	3.27869	C	T	synonymous_variant	LOW	MPN020	p.Asn877Asn	gene
884	p2_2_S1	2	25703	0	78	77	1	1.2987	TAAA	CAGT	missense_variant	MODERATE	MPN020	p.Lys895Ser	gene
885	p2_2_S1	2	25714	0	77	76	1	1.31579	TTA	CTG	missense_variant	MODERATE	MPN020	p.PheLys898SerGlu	gene
886	p2_2_S1	2	25765	3.26614e-15	67	66	1	1.51515	AA	GT	missense_variant	MODERATE	MPN020	p.Lys915Ser	gene
887	p2_2_S1	2	25809	2.67497e-15	88	86	2	2.32558	C	T	missense_variant	MODERATE	MPN020	p.Pro930Ser	gene
888	p2_2_S1	2	25830	0	81	79	2	2.53165	T	C	synonymous_variant	LOW	MPN020	p.Leu937Leu	gene
889	p2_2_S1	2	25852	0	78	77	1	1.2987	TTAA	CTAT	missense_variant	MODERATE	MPN020	p.IleAsn944ThrIle	gene
890	p2_2_S1	2	25869	0	77	76	1	1.31579	G	A	missense_variant	MODERATE	MPN020	p.Glu950Lys	gene
891	p2_2_S1	2	25941	0	59	58	1	1.72414	ATA	GTG	missense_variant	MODERATE	MPN020	p.Ile974Val	gene
892	p2_2_S1	2	25944	0	63	61	2	3.27869	G	T	missense_variant	MODERATE	MPN020	p.Gly975Trp	gene
893	p2_2_S1	2	25950	0	55	54	1	1.85185	A	G	missense_variant	MODERATE	MPN020	p.Lys977Glu	gene
894	p2_2_S1	2	25987	0	49	48	1	2.08333	ATA	GTT	missense_variant	MODERATE	MPN020	p.AsnThr989SerSer	gene
895	p2_2_S1	2	26002	1.21341e-15	55	54	1	1.85185	GGGTC	AAGTT	missense_variant	MODERATE	MPN020	p.Arg994Gln	gene
896	p2_2_S1	2	26007	0	57	56	1	1.78571	T	C	missense_variant	MODERATE	MPN020	p.Cys996Arg	gene
897	p2_2_S1	2	26101	1.81565e-15	44	43	1	2.32558	G	A	missense_variant	MODERATE	MPN020	p.Arg1027His	gene
898	p2_2_S1	2	26125	2.41129e-15	60	59	1	1.69492	T	G	upstream_gene_variant	MODIFIER	MPN021	c.-35T>G	intergenic
899	p2_2_S1	2	26145	0	72	71	1	1.40845	T	A	upstream_gene_variant	MODIFIER	MPN021	c.-15T>A	intergenic
900	p2_2_S1	2	26181	0	73	71	2	2.8169	TATTA	AATAG	missense_variant	MODERATE	MPN021	p.TyrTyr8AsnSer	gene
901	p2_2_S1	2	26194	3.35302e-15	73	71	2	2.8169	TAGGCGTT	AAGGTGTA	stop_gained	HIGH	MPN021	p.Leu12*	gene
902	p2_2_S1	2	26205	0	73	72	1	1.38889	AGATC	TGATT	missense_variant	MODERATE	MPN021	p.ArgSer16TrpPhe	gene
903	p2_2_S1	2	26216	7.23269e-15	71	69	2	2.89855	CGCACA	CACACT	missense_variant	MODERATE	MPN021	p.AlaGln20ThrLeu	gene
904	p2_2_S1	2	26242	3.6765e-15	70	69	1	1.44928	G	A	missense_variant	MODERATE	MPN021	p.Arg28His	gene
905	p2_2_S1	2	26248	1.91359e-15	74	73	1	1.36986	T	C	missense_variant	MODERATE	MPN021	p.Leu30Pro	gene
906	p2_2_S1	2	26320	2.27921e-15	69	68	1	1.47059	T	C	missense_variant	MODERATE	MPN021	p.Phe54Ser	gene
907	p2_2_S1	2	26323	2.56149e-16	69	68	1	1.47059	A	G	missense_variant	MODERATE	MPN021	p.Lys55Arg	gene
908	p2_2_S1	2	26340	0	61	60	1	1.66667	T	C	missense_variant	MODERATE	MPN021	p.Tyr61His	gene
909	p2_2_S1	2	26373	2.80281e-15	72	71	1	1.40845	A	G	missense_variant	MODERATE	MPN021	p.Met72Val	gene
910	p2_2_S1	2	26401	0	67	65	2	3.07692	T	C	missense_variant	MODERATE	MPN021	p.Leu81Ser	gene
911	p2_2_S1	2	26450	0	62	61	1	1.63934	TAA	CAT	missense_variant	MODERATE	MPN021	p.Asn98Ile	gene
912	p2_2_S1	2	26515	0	50	49	1	2.04082	T	C	missense_variant	MODERATE	MPN021	p.Phe119Ser	gene
913	p2_2_S1	2	26594	7.60232e-15	57	56	1	1.78571	C	T	synonymous_variant	LOW	MPN021	p.Ser145Ser	gene
914	p2_2_S1	2	26597	0	56	55	1	1.81818	CTT	GTA	missense_variant	MODERATE	MPN021	p.PhePhe146LeuTyr	gene
915	p2_2_S1	2	26609	5.83917e-15	61	60	1	1.66667	T	A	synonymous_variant	LOW	MPN021	p.Thr150Thr	gene
916	p2_2_S1	2	26637	0	71	70	1	1.42857	A	T	missense_variant	MODERATE	MPN021	p.Thr160Ser	gene
917	p2_2_S1	2	26647	3.88768e-15	74	73	1	1.36986	T	C	missense_variant	MODERATE	MPN021	p.Val163Ala	gene
918	p2_2_S1	2	26671	0	80	79	1	1.26582	T	C	missense_variant	MODERATE	MPN021	p.Phe171Ser	gene
919	p2_2_S1	2	26690	3.38292e-15	88	87	1	1.14943	A	G	synonymous_variant	LOW	MPN021	p.Glu177Glu	gene
920	p2_2_S1	2	26758	1.90605e-15	74	73	1	1.36986	T	A	missense_variant	MODERATE	MPN021	p.Phe200Tyr	gene
921	p2_2_S1	2	26763	0	81	80	1	1.25	A	C	missense_variant	MODERATE	MPN021	p.Thr202Pro	gene
922	p2_2_S1	2	26781	2.80281e-15	72	71	1	1.40845	T	C	synonymous_variant	LOW	MPN021	p.Leu208Leu	gene
923	p2_2_S1	2	26807	0	76	74	2	2.7027	T	A	synonymous_variant	LOW	MPN021	p.Gly216Gly	gene
924	p2_2_S1	2	26808	0	77	76	1	1.31579	AAA	GAG	missense_variant	MODERATE	MPN021	p.Lys217Glu	gene
925	p2_2_S1	2	26890	0	66	64	2	3.125	C	A	missense_variant	MODERATE	MPN021	p.Ala244Asp	gene
926	p2_2_S1	2	26899	0	74	73	1	1.36986	ACCA	TCCT	missense_variant	MODERATE	MPN021	p.TyrHis247PheLeu	gene
927	p2_2_S1	2	26906	3.68403e-15	70	69	1	1.44928	T	A	synonymous_variant	LOW	MPN021	p.Gly249Gly	gene
928	p2_2_S1	2	26919	0	65	64	1	1.5625	GAT	AAA	missense_variant	MODERATE	MPN021	p.Asp254Lys	gene
929	p2_2_S1	2	26964	0	62	61	1	1.63934	G	A	missense_variant	MODERATE	MPN021	p.Val269Met	gene
930	p2_2_S1	2	27060	0	58	56	2	3.57143	G	T	missense_variant	MODERATE	MPN021	p.Gly301Trp	gene
931	p2_2_S1	2	27177	1.43543e-15	58	57	1	1.75439	TTCCGC	AACCGT	missense_variant	MODERATE	MPN021	p.Phe340Asn	gene
932	p2_2_S1	2	27191	0	65	64	1	1.5625	CGGGGAT	TGAGGAA	missense_variant	MODERATE	MPN021	p.GlyAsp345GluGlu	gene
933	p2_2_S1	2	27207	2.63919e-16	69	68	1	1.47059	A	G	missense_variant	MODERATE	MPN021	p.Ile350Val	gene
934	p2_2_S1	2	27231	2.64484e-15	81	80	1	1.25	G	A	missense_variant	MODERATE	MPN021	p.Glu358Lys	gene
935	p2_2_S1	2	27289	0	63	62	1	1.6129	T	A	missense_variant	MODERATE	MPN021	p.Val377Glu	gene
936	p2_2_S1	2	27327	0	71	70	1	1.42857	T	C	missense_variant	MODERATE	MPN021	p.Ser390Pro	gene
937	p2_2_S1	2	27352	1.22848e-15	77	75	2	2.66667	G	A	missense_variant	MODERATE	MPN022	p.Val13Ile	gene
938	p2_2_S1	2	27353	0	71	69	2	2.89855	TTGGT	ATGGA	missense_variant	MODERATE	MPN022	p.Val13Asp	gene
939	p2_2_S1	2	27369	0	74	73	1	1.36986	GGT	AGA	missense_variant	MODERATE	MPN022	p.Val19Asp	gene
940	p2_2_S1	2	27383	0	71	70	1	1.42857	C	G	missense_variant	MODERATE	MPN022	p.Thr23Ser	gene
941	p2_2_S1	2	27384	3.05166e-15	70	69	1	1.44928	TGCTG	AGCAA	missense_variant	MODERATE	MPN022	p.Gly25Ser	gene
942	p2_2_S1	2	27398	0	68	67	1	1.49254	A	G	missense_variant	MODERATE	MPN022	p.Gln28Arg	gene
943	p2_2_S1	2	27413	2.92335e-15	72	71	1	1.40845	TTT	ATC	missense_variant	MODERATE	MPN022	p.LeuTyr33HisHis	gene
944	p2_2_S1	2	27505	1.90605e-15	74	73	1	1.36986	CGGGGTT	TGGGCTA	missense_variant	MODERATE	MPN022	p.ArgGlyCys64TrpAlaSer	gene
945	p2_2_S1	2	27555	0	81	80	1	1.25	CCAA	TCAT	missense_variant	MODERATE	MPN022	p.Gln81His	gene
946	p2_2_S1	2	27560	0	79	77	2	2.5974	ACTTA	TCTTT	missense_variant	MODERATE	MPN022	p.AspLeu82ValPhe	gene
947	p2_2_S1	2	27579	0	75	74	1	1.35135	A	T	missense_variant	MODERATE	MPN022	p.Glu88Asp	gene
948	p2_2_S1	2	27617	6.2686e-15	83	81	2	2.46914	T	C	missense_variant	MODERATE	MPN022	p.Leu101Pro	gene
949	p2_2_S1	2	27619	5.16089e-15	84	83	1	1.20482	T	A	missense_variant	MODERATE	MPN022	p.Phe102Ile	gene
950	p2_2_S1	2	27649	2.12453e-15	78	77	1	1.2987	T	C	synonymous_variant	LOW	MPN022	p.Leu112Leu	gene
951	p2_2_S1	2	27659	0	69	68	1	1.47059	CCAT	TCAC	missense_variant	MODERATE	MPN022	p.AlaIle115ValThr	gene
952	p2_2_S1	2	27684	0	50	49	1	2.04082	A	G	synonymous_variant	LOW	MPN022	p.Glu123Glu	gene
953	p2_2_S1	2	27744	0	58	57	1	1.75439	GGG	AGA	missense_variant	MODERATE	MPN022	p.Gly144Asp	gene
954	p2_2_S1	2	27884	7.00668e-15	38	36	2	5.55556	A	G	missense_variant	MODERATE	MPN022	p.Gln190Arg	gene
955	p2_2_S1	2	27924	5.06295e-15	51	49	2	4.08163	A	G	synonymous_variant	LOW	MPN022	p.Leu203Leu	gene
956	p2_2_S1	2	27932	3.29981e-15	55	53	2	3.77358	T	C	missense_variant	MODERATE	MPN022	p.Ile206Thr	gene
957	p2_2_S1	2	27943	0	59	58	1	1.72414	A	T	stop_gained	HIGH	MPN022	p.Lys210*	gene
958	p2_2_S1	2	27976	1.73278e-16	61	59	2	3.38983	TTTAAGT	ATAAAGT	missense_variant	MODERATE	MPN022	p.Phe221Ile	gene
959	p2_2_S1	2	27983	7.60962e-15	57	56	1	1.78571	T	A	stop_gained	HIGH	MPN022	p.Leu223*	gene
960	p2_2_S1	2	28004	2.70464e-15	69	68	1	1.47059	ACG	TCA	missense_variant	MODERATE	MPN022	p.TyrAla230PheThr	gene
961	p2_2_S1	2	28024	3.01588e-16	59	57	2	3.50877	TTAAA	CTAAC	missense_variant	MODERATE	MPN022	p.Lys238Thr	gene
962	p2_2_S1	2	28029	0	58	57	1	1.75439	A	T	missense_variant	MODERATE	MPN022	p.Lys238Asn	gene
963	p2_2_S1	2	28030	0	59	58	1	1.72414	C	T	missense_variant	MODERATE	MPN022	p.Pro239Ser	gene
964	p2_2_S1	2	28052	3.42082e-15	58	57	1	1.75439	TTGC	CTGT	missense_variant	MODERATE	MPN022	p.ValAla246AlaVal	gene
965	p2_2_S1	2	28083	0	57	56	1	1.78571	A	T	missense_variant	MODERATE	MPN022	p.Leu256Phe	gene
966	p2_2_S1	2	28098	9.49731e-16	63	62	1	1.6129	TGAT	AGAA	missense_variant	MODERATE	MPN022	p.PheAsp261LeuGlu	gene
967	p2_2_S1	2	28124	0	77	76	1	1.31579	C	T	missense_variant	MODERATE	MPN022	p.Ala270Val	gene
968	p2_2_S1	2	28140	0	67	65	2	3.07692	T	C	synonymous_variant	LOW	MPN022	p.Arg275Arg	gene
969	p2_2_S1	2	28142	2.26391e-15	69	68	1	1.47059	C	T	missense_variant	MODERATE	MPN022	p.Ala276Val	gene
970	p2_2_S1	2	28162	2.16621e-15	72	71	1	1.40845	TATGT	CATGA	missense_variant	MODERATE	MPN022	p.TyrVal283HisGlu	gene
971	p2_2_S1	2	28191	0	93	92	1	1.08696	C	A	synonymous_variant	LOW	MPN022	p.Gly292Gly	gene
972	p2_2_S1	2	28217	0	85	83	2	2.40964	TTAA	CTAC	missense_variant	MODERATE	MPN022	p.IleLys301ThrThr	gene
973	p2_2_S1	2	28227	0	83	82	1	1.21951	TTTAA	ATCAG	missense_variant	MODERATE	MPN022	p.LeuLys305SerGlu	gene
974	p2_2_S1	2	28234	7.27789e-15	84	83	1	1.20482	ACACA	GCACT	missense_variant	MODERATE	MPN022	p.ThrGln307AlaLeu	gene
975	p2_2_S1	2	28249	0	74	73	1	1.36986	AA	TG	missense_variant	MODERATE	MPN023	p.Lys2Met	essential
976	p2_2_S1	2	28258	0	83	82	1	1.21951	ACA	TCT	missense_variant	MODERATE	MPN023	p.TyrIle5PhePhe	essential
977	p2_2_S1	2	28280	6.68272e-15	64	62	2	3.22581	CGCCTCGGGT	TGCCACGAGT	missense_variant	MODERATE	MPN023	p.SerGly14ThrSer	essential
978	p2_2_S1	2	28296	2.30558e-15	56	54	2	3.7037	CACATTGG	CTCTTTGG	missense_variant	MODERATE	MPN023	p.HisIle18LeuPhe	essential
979	p2_2_S1	2	28322	0	58	57	1	1.75439	C	T	synonymous_variant	LOW	MPN023	p.Ile26Ile	essential
980	p2_2_S1	2	28325	3.0891e-15	54	53	1	1.88679	A	T	missense_variant	MODERATE	MPN023	p.Leu27Phe	essential
981	p2_2_S1	2	28348	0	56	55	1	1.81818	AACAGCA	GACTGCT	missense_variant	MODERATE	MPN023	p.LysGlnGln35ArgLeuLeu	essential
982	p2_2_S1	2	28360	1.16421e-15	67	66	1	1.51515	G	C	missense_variant	MODERATE	MPN023	p.Gly39Ala	essential
983	p2_2_S1	2	28367	0	68	67	1	1.49254	A	G	synonymous_variant	LOW	MPN023	p.Glu41Glu	essential
984	p2_2_S1	2	28475	5.07049e-15	51	49	2	4.08163	T	C	synonymous_variant	LOW	MPN023	p.Phe77Phe	essential
985	p2_2_S1	2	28501	0	70	69	1	1.44928	TTAACTT	ATAAGTA	missense_variant	MODERATE	MPN023	p.IleAsnPhe86AsnLysTyr	essential
986	p2_2_S1	2	28518	0	67	66	1	1.51515	A	T	missense_variant	MODERATE	MPN023	p.Ile92Phe	essential
987	p2_2_S1	2	28536	5.3191e-15	75	74	1	1.35135	A	T	missense_variant	MODERATE	MPN023	p.Ser98Cys	essential
988	p2_2_S1	2	28629	0	84	83	1	1.20482	T	C	missense_variant	MODERATE	MPN023	p.Cys129Arg	essential
989	p2_2_S1	2	28680	5.68049e-15	70	69	1	1.44928	G	A	missense_variant	MODERATE	MPN023	p.Gly146Ser	essential
990	p2_2_S1	2	28733	5.59762e-15	57	56	1	1.78571	T	A	missense_variant	MODERATE	MPN023	p.Asp163Glu	essential
991	p2_2_S1	2	28738	3.08156e-15	54	53	1	1.88679	A	T	missense_variant	MODERATE	MPN023	p.Lys165Met	essential
992	p2_2_S1	2	28753	7.16183e-16	51	50	1	2	AAA	TAT	missense_variant	MODERATE	MPN023	p.GluMet170ValLeu	essential
993	p2_2_S1	2	28788	0	38	37	1	2.7027	GAATC	AAATG	missense_variant	MODERATE	MPN023	p.GluSer182LysCys	essential
994	p2_2_S1	2	28903	1.22848e-15	77	75	2	2.66667	C	T	missense_variant	MODERATE	MPN023	p.Thr220Met	essential
995	p2_2_S1	2	28970	0	59	58	1	1.72414	TAAA	CAAG	synonymous_variant	LOW	MPN023	p.244	essential
996	p2_2_S1	2	28976	0	52	51	1	1.96078	T	A	missense_variant	MODERATE	MPN023	p.Phe244Leu	essential
997	p2_2_S1	2	29020	0	50	49	1	2.04082	A	T	missense_variant	MODERATE	MPN023	p.His259Leu	essential
998	p2_2_S1	2	29076	0	48	46	2	4.34783	C	A	missense_variant	MODERATE	MPN023	p.His278Asn	essential
999	p2_2_S1	2	29130	3.81964e-15	61	60	1	1.66667	G	C	missense_variant	MODERATE	MPN023	p.Asp296His	essential
1000	p2_2_S1	2	29150	0	55	54	1	1.85185	G	A	missense_variant	MODERATE	MPN023	p.Met302Ile	essential
1001	p2_2_S1	2	29167	0	48	47	1	2.12766	A	G	missense_variant	MODERATE	MPN023	p.Asn308Ser	essential
1002	p2_2_S1	2	29176	2.18127e-15	56	55	1	1.81818	C	T	missense_variant	MODERATE	MPN023	p.Ser311Phe	essential
1003	p2_2_S1	2	29185	1.05709e-16	55	54	1	1.85185	AACTA	TACTT	missense_variant	MODERATE	MPN023	p.Glu314Val	essential
1004	p2_2_S1	2	29199	0	66	65	1	1.53846	TTTG	ATTA	missense_variant	MODERATE	MPN023	p.PheGly319IleSer	essential
1005	p2_2_S1	2	29220	2.78774e-15	72	71	1	1.40845	T	A	missense_variant	MODERATE	MPN023	p.Tyr326Asn	essential
1006	p2_2_S1	2	29241	0	70	69	1	1.44928	CGCTTG	TGTATA	missense_variant	MODERATE	MPN023	p.ArgLeu333CysIle	essential
1007	p2_2_S1	2	29279	0	69	68	1	1.47059	TAAG	AAAA	missense_variant	MODERATE	MPN023	p.Phe345Leu	essential
1008	p2_2_S1	2	29284	0	65	64	1	1.5625	A	T	missense_variant	MODERATE	MPN023	p.Asp347Val	essential
1009	p2_2_S1	2	29388	2.0492e-15	65	64	1	1.5625	C	A	missense_variant	MODERATE	MPN023	p.Gln382Lys	essential
1010	p2_2_S1	2	29423	1.36385e-15	68	66	2	3.0303	G	T	synonymous_variant	LOW	MPN023	p.Ala393Ala	essential
1011	p2_2_S1	2	29450	0	54	53	1	1.88679	CGCTT	TGCTA	missense_variant	MODERATE	MPN023	p.Trp404Arg	essential
1012	p2_2_S1	2	29515	0	59	58	1	1.72414	GCA	ACT	stop_gained	HIGH	MPN023	p.SerLys424*	essential
1013	p2_2_S1	2	29536	4.82399e-16	63	61	2	3.27869	AACCGT	TACTGT	missense_variant	MODERATE	MPN023	p.LysPro431IleLeu	essential
1014	p2_2_S1	2	29559	0	66	65	1	1.53846	A	G	missense_variant	MODERATE	MPN023	p.Thr439Ala	essential
1015	p2_2_S1	2	29568	0	72	71	1	1.40845	ACC	TCT	missense_variant	MODERATE	MPN023	p.Thr442Ser	essential
1016	p2_2_S1	2	29616	2.24884e-15	78	77	1	1.2987	TGCT	AGCG	missense_variant	MODERATE	MPN023	p.CysPhe458SerVal	essential
1017	p2_2_S1	2	29631	1.13761e-15	76	75	1	1.33333	GCG	ACA	missense_variant	MODERATE	MPN023	p.Ala463Thr	essential
1018	p2_2_S1	2	29644	0	80	78	2	2.5641	TTCAT	ACCAC	missense_variant	MODERATE	MPN023	p.Val467Asp	essential
1019	p2_2_S1	2	29670	1.00977e-15	76	75	1	1.33333	C	T	synonymous_variant	LOW	MPN023	p.Leu476Leu	essential
1020	p2_2_S1	2	29695	0	82	81	1	1.23457	G	T	missense_variant	MODERATE	MPN023	p.Arg484Leu	essential
1021	p2_2_S1	2	29733	2.24531e-15	78	77	1	1.2987	AAAA	GAAG	missense_variant	MODERATE	MPN023	p.LysIle497GluVal	essential
1022	p2_2_S1	2	29762	0	79	78	1	1.28205	TTTAT	ATTAA	missense_variant	MODERATE	MPN023	p.Phe508Ile	essential
1023	p2_2_S1	2	29771	0	77	76	1	1.31579	AAGAT	GAGAA	missense_variant	MODERATE	MPN023	p.Leu511Met	essential
1024	p2_2_S1	2	29872	0	38	37	1	2.7027	GGCGGAACC	CGCAGTACT	missense_variant	MODERATE	MPN024	p.LysAlaGluPro23AsnAlaValLeu	essential
1025	p2_2_S1	2	29885	0	45	44	1	2.27273	T	G	missense_variant	MODERATE	MPN024	p.Ser28Ala	essential
1026	p2_2_S1	2	29902	1.59764e-15	40	39	1	2.5641	A	T	missense_variant	MODERATE	MPN024	p.Trp33Cys	essential
1027	p2_2_S1	2	29910	0	57	56	1	1.78571	T	A	missense_variant	MODERATE	MPN024	p.Val36Glu	essential
1028	p2_2_S1	2	29954	2.1097e-15	53	52	1	1.92308	ATTTC	GTTTT	missense_variant	MODERATE	MPN024	p.IleSer51ValLeu	essential
1029	p2_2_S1	2	29963	2.5582e-15	51	50	1	2	T	C	missense_variant	MODERATE	MPN024	p.Phe54Leu	essential
1030	p2_2_S1	2	29976	0	60	59	1	1.69492	TTTT	AATA	stop_gained	HIGH	MPN024	p.PheLeu58*	essential
1031	p2_2_S1	2	29989	4.06826e-16	55	53	2	3.77358	TAACTTTGTTTATT	AAAAATTGAATATT	missense_variant	MODERATE	MPN024	p.AsnPheVal63LysIleGlu	essential
1032	p2_2_S1	2	30031	1.37115e-15	71	70	1	1.42857	C	T	synonymous_variant	LOW	MPN024	p.Asp76Asp	essential
1033	p2_2_S1	2	30038	0	66	65	1	1.53846	A	G	missense_variant	MODERATE	MPN024	p.Lys79Glu	essential
1034	p2_2_S1	2	30050	4.61093e-15	75	73	2	2.73973	T	C	missense_variant	MODERATE	MPN024	p.Trp83Arg	essential
1035	p2_2_S1	2	30057	0	77	76	1	1.31579	A	G	missense_variant	MODERATE	MPN024	p.Lys85Arg	essential
1036	p2_2_S1	2	30105	2.98009e-15	85	84	1	1.19048	ATGA	GTGT	missense_variant	MODERATE	MPN024	p.TyrGlu101CysVal	essential
1037	p2_2_S1	2	30109	0	69	67	2	2.98507	A	G	synonymous_variant	LOW	MPN024	p.Glu102Glu	essential
1038	p2_2_S1	2	30147	3.31511e-15	75	74	1	1.35135	TGAA	AGAT	missense_variant	MODERATE	MPN024	p.ValAsn115GluIle	essential
1039	p2_2_S1	2	30151	5.8161e-15	67	66	1	1.51515	TGACTTCAT	AGACATCAA	missense_variant	MODERATE	MPN024	p.AsnAspPheIle116LysAspIleAsn	essential
1040	p2_2_S1	2	30172	0	77	76	1	1.31579	T	G	missense_variant	MODERATE	MPN024	p.Asp123Glu	essential
1041	p2_2_S1	2	30196	0	76	75	1	1.33333	T	A	missense_variant	MODERATE	MPN024	p.Asp131Glu	essential
1042	p2_2_S1	2	30224	3.46791e-16	82	81	1	1.23457	T	C	missense_variant	MODERATE	MPN024	p.Phe141Leu	essential
1043	p2_2_S1	2	30287	3.39045e-15	88	87	1	1.14943	A	T	missense_variant	MODERATE	MPN025	p.His15Leu	gene
1044	p2_2_S1	2	30297	1.60494e-15	92	91	1	1.0989	T	C	synonymous_variant	LOW	MPN025	p.Ala18Ala	gene
1045	p2_2_S1	2	30318	0	79	77	2	2.5974	TAACT	CAGCC	missense_variant	MODERATE	MPN025	p.AsnTyr26SerHis	gene
1046	p2_2_S1	2	30333	2.49769e-15	90	89	1	1.1236	T	A	synonymous_variant	LOW	MPN025	p.Ala30Ala	gene
1047	p2_2_S1	2	30334	4.88238e-15	91	90	1	1.11111	AAGGC	GAGGG	missense_variant	MODERATE	MPN025	p.LysAla31GluGly	gene
1048	p2_2_S1	2	30345	2.65214e-15	81	80	1	1.25	A	T	missense_variant	MODERATE	MPN025	p.Leu34Phe	gene
1049	p2_2_S1	2	30397	0	89	88	1	1.13636	GCT	ACA	missense_variant	MODERATE	MPN025	p.Ala52Thr	gene
1050	p2_2_S1	2	30408	0	83	82	1	1.21951	TATT	AATA	stop_gained	HIGH	MPN025	p.Tyr55*	gene
1051	p2_2_S1	2	30422	0	81	80	1	1.25	A	T	missense_variant	MODERATE	MPN025	p.Gln60Leu	gene
1052	p2_2_S1	2	30462	2.80281e-15	72	71	1	1.40845	A	T	missense_variant	MODERATE	MPN025	p.Leu73Phe	gene
1053	p2_2_S1	2	30506	0	50	49	1	2.04082	A	T	missense_variant	MODERATE	MPN025	p.Tyr88Phe	gene
1054	p2_2_S1	2	30550	1.29605e-15	58	57	1	1.75439	A	G	missense_variant	MODERATE	MPN025	p.Met103Val	gene
1055	p2_2_S1	2	30596	3.08156e-15	54	53	1	1.88679	C	T	missense_variant	MODERATE	MPN025	p.Ser118Phe	gene
1056	p2_2_S1	2	30629	3.29981e-15	55	53	2	3.77358	A	C	missense_variant	MODERATE	MPN025	p.Asn129Thr	gene
1057	p2_2_S1	2	30632	7.83751e-16	55	54	1	1.85185	C	A	missense_variant	MODERATE	MPN025	p.Ala130Asp	gene
1058	p2_2_S1	2	30636	0	53	52	1	1.92308	TGTGG	AGTGA	missense_variant	MODERATE	MPN025	p.Glu133Lys	gene
1059	p2_2_S1	2	30710	5.53005e-15	79	78	1	1.28205	A	G	missense_variant	MODERATE	MPN025	p.Glu156Gly	gene
1060	p2_2_S1	2	30734	0	80	79	1	1.26582	T	C	missense_variant	MODERATE	MPN025	p.Leu164Ser	gene
1061	p2_2_S1	2	30735	2.63707e-15	81	80	1	1.25	A	T	missense_variant	MODERATE	MPN025	p.Leu164Phe	gene
1062	p2_2_S1	2	30800	0	82	81	1	1.23457	G	C	missense_variant	MODERATE	MPN025	p.Gly186Ala	gene
1063	p2_2_S1	2	30803	1.17009e-16	78	77	1	1.2987	T	A	stop_gained	HIGH	MPN025	p.Leu187*	gene
1064	p2_2_S1	2	30816	1.80082e-15	71	70	1	1.42857	AAT	GAA	missense_variant	MODERATE	MPN025	p.Ile192Asn	gene
1065	p2_2_S1	2	30841	0	79	78	1	1.28205	AACTT	GACTA	stop_gained	HIGH	MPN025	p.AsnLeu200*	gene
1066	p2_2_S1	2	30854	0	76	75	1	1.33333	T	G	missense_variant	MODERATE	MPN025	p.Val204Gly	gene
1067	p2_2_S1	2	30860	0	75	74	1	1.35135	A	T	missense_variant	MODERATE	MPN025	p.His206Leu	gene
1068	p2_2_S1	2	30864	0	72	71	1	1.40845	T	G	synonymous_variant	LOW	MPN025	p.Gly207Gly	gene
1069	p2_2_S1	2	30875	0	66	65	1	1.53846	T	C	missense_variant	MODERATE	MPN025	p.Ile211Thr	gene
1070	p2_2_S1	2	30885	2.63919e-16	69	68	1	1.47059	G	A	synonymous_variant	LOW	MPN025	p.Ala214Ala	gene
1071	p2_2_S1	2	30912	3.54489e-15	79	78	1	1.28205	C	T	synonymous_variant	LOW	MPN025	p.Gly223Gly	gene
1072	p2_2_S1	2	30935	1.17009e-16	78	77	1	1.2987	C	G	missense_variant	MODERATE	MPN025	p.Thr231Ser	gene
1073	p2_2_S1	2	30948	0	71	69	2	2.89855	A	G	synonymous_variant	LOW	MPN025	p.Leu235Leu	gene
1074	p2_2_S1	2	31054	3.69957e-15	70	69	1	1.44928	ATT	GTA	missense_variant	MODERATE	MPN025	p.Ile271Val	gene
1075	p2_2_S1	2	31077	2.93089e-15	63	62	1	1.6129	G	A	synonymous_variant	LOW	MPN025	p.Lys278Lys	gene
1076	p2_2_S1	2	31159	6.37078e-16	64	63	1	1.5873	T	C	synonymous_variant	LOW	MPN026	p.Leu17Leu	gene
1077	p2_2_S1	2	31163	3.68403e-15	70	69	1	1.44928	T	A	missense_variant	MODERATE	MPN026	p.Phe18Tyr	gene
1078	p2_2_S1	2	31180	6.99914e-15	68	67	1	1.49254	CTG	TTA	synonymous_variant	LOW	MPN026	p.25	gene
1079	p2_2_S1	2	31206	5.68049e-15	70	69	1	1.44928	CTTTGC	CTTGC	frameshift_variant	HIGH	MPN026	p.Phe33fs	gene
1080	p2_2_S1	2	31214	3.53736e-15	79	78	1	1.28205	C	A	missense_variant	MODERATE	MPN026	p.Thr35Lys	gene
1081	p2_2_S1	2	31217	3.6765e-15	79	78	1	1.28205	TTG	CCC	missense_variant	MODERATE	MPN026	p.IleGlu36ThrGln	gene
1082	p2_2_S1	2	31220	0	80	79	1	1.26582	A	T	missense_variant	MODERATE	MPN026	p.Glu37Val	gene
1083	p2_2_S1	2	31239	3.90275e-15	74	73	1	1.36986	T	A	synonymous_variant	LOW	MPN026	p.Val43Val	gene
1084	p2_2_S1	2	31240	0	79	78	1	1.28205	AACG	TTCA	missense_variant	MODERATE	MPN026	p.AsnVal44PheIle	gene
1085	p2_2_S1	2	31244	2.64484e-15	81	80	1	1.25	T	A	missense_variant	MODERATE	MPN026	p.Val45Glu	gene
1086	p2_2_S1	2	31246	2.5542e-15	78	77	1	1.2987	ATC	GTT	missense_variant	MODERATE	MPN026	p.Ile46Val	gene
1087	p2_2_S1	2	31255	4.59562e-16	82	81	1	1.23457	CGCT	TGCA	missense_variant	MODERATE	MPN026	p.ArgLeu49CysIle	gene
1088	p2_2_S1	2	31277	1.00977e-15	76	75	1	1.33333	T	A	stop_gained	HIGH	MPN026	p.Leu56*	gene
1089	p2_2_S1	2	31287	6.41151e-15	74	72	2	2.77778	C	T	synonymous_variant	LOW	MPN026	p.Pro59Pro	gene
1090	p2_2_S1	2	31303	0	67	65	2	3.07692	A	T	missense_variant	MODERATE	MPN026	p.Thr65Ser	gene
1091	p2_2_S1	2	31315	0	59	58	1	1.72414	TTTGT	CTTGA	missense_variant	MODERATE	MPN026	p.PheVal69LeuAsp	gene
1092	p2_2_S1	2	31441	0	54	53	1	1.88679	ATTGTC	ATGTC	frameshift_variant	HIGH	MPN026	p.Ile111fs	gene
1093	p2_2_S1	2	31533	0	40	39	1	2.5641	CCG	TCT	missense_variant	MODERATE	MPN026	p.Arg142Leu	gene
1094	p2_2_S1	2	31536	3.23954e-15	40	39	1	2.5641	GATT	AATA	synonymous_variant	LOW	MPN026	p.144	gene
1095	p2_2_S1	2	31543	4.97467e-16	38	37	1	2.7027	AAGA	TAGT	stop_gained	HIGH	MPN026	p.LysIle145*	gene
1096	p2_2_S1	2	31693	2.20034e-15	56	55	1	1.81818	C	G	missense_variant	MODERATE	MPN026	p.Leu195Val	gene
1097	p2_2_S1	2	31754	0	50	49	1	2.04082	A	G	missense_variant	MODERATE	MPN026	p.Asp215Gly	gene
1098	p2_2_S1	2	31771	0	54	53	1	1.88679	A	C	missense_variant	MODERATE	MPN026	p.Thr221Pro	gene
1099	p2_2_S1	2	31786	0	60	59	1	1.69492	TTCTT	CTCTA	stop_gained	HIGH	MPN026	p.PheLeu226*	gene
1100	p2_2_S1	2	31868	2.75761e-15	88	87	1	1.14943	GTCG	ATCA	missense_variant	MODERATE	MPN026	p.GlyArg253AspHis	gene
1101	p2_2_S1	2	31898	7.08649e-16	94	93	1	1.07527	T	A	stop_gained	HIGH	MPN026	p.Leu263*	gene
1102	p2_2_S1	2	31905	0	93	92	1	1.08696	TTA	ATC	missense_variant	MODERATE	MPN026	p.AspTyr265GluSer	gene
1103	p2_2_S1	2	31910	0	89	88	1	1.13636	A	T	missense_variant	MODERATE	MPN026	p.Gln267Leu	gene
1104	p2_2_S1	2	31919	0	86	85	1	1.17647	ACCA	TCCG	missense_variant	MODERATE	MPN026	p.AsnGln270IleArg	gene
1105	p2_2_S1	2	31963	3.53359e-15	74	73	1	1.36986	TTCT	CTCA	missense_variant	MODERATE	MPN026	p.PhePhe285LeuIle	gene
1106	p2_2_S1	2	31971	0	66	65	1	1.53846	CTTT	GTAA	stop_gained	HIGH	MPN026	p.Phe288*	gene
1107	p2_2_S1	2	32013	5.71063e-15	64	63	1	1.5873	TTGGT	CTGGC	synonymous_variant	LOW	MPN026	p.304	gene
1108	p2_2_S1	2	32024	2.68981e-15	69	68	1	1.47059	CGC	TGT	stop_gained	HIGH	MPN026	p.ProGln305*	gene
1109	p2_2_S1	2	32054	2.0492e-15	65	64	1	1.5625	T	C	missense_variant	MODERATE	MPN026	p.Phe315Ser	gene
1110	p2_2_S1	2	32071	0	50	49	1	2.04082	AAA	TAT	missense_variant	MODERATE	MPN026	p.Lys321Tyr	gene
1111	p2_2_S1	2	32103	3.14207e-15	64	62	2	3.22581	C	T	synonymous_variant	LOW	MPN026	p.Tyr331Tyr	gene
1112	p2_2_S1	2	32203	2.0492e-15	65	64	1	1.5625	A	G	upstream_gene_variant	MODIFIER	MPN028	c.-855A>G	intergenic
1113	p2_2_S1	2	32267	0	55	54	1	1.85185	A	G	synonymous_variant	LOW	MPN027	p.Cys253Cys	gene
1114	p2_2_S1	2	32352	0	44	42	2	4.7619	T	C	missense_variant	MODERATE	MPN027	p.Lys225Arg	gene
1115	p2_2_S1	2	32386	0	50	49	1	2.04082	TAATT	AAATC	missense_variant	MODERATE	MPN027	p.Asn214Tyr	gene
1116	p2_2_S1	2	32413	1.35656e-15	46	45	1	2.22222	TTGGT	ATGGA	missense_variant	MODERATE	MPN027	p.LysProThr203AsnProSer	gene
1117	p2_2_S1	2	32455	3.7443e-15	50	49	1	2.04082	CAAGAT	TAAAAA	missense_variant	MODERATE	MPN027	p.TyrLeuGly189PhePheSer	gene
1118	p2_2_S1	2	32538	0	56	55	1	1.81818	TTCTT	CTCTA	stop_gained	HIGH	MPN027	p.LysLys162*	gene
1119	p2_2_S1	2	32575	0	58	57	1	1.75439	T	A	missense_variant	MODERATE	MPN027	p.Asn151Tyr	gene
1120	p2_2_S1	2	32583	3.29251e-15	55	53	2	3.77358	T	C	missense_variant	MODERATE	MPN027	p.His148Arg	gene
1121	p2_2_S1	2	32611	0	38	37	1	2.7027	A	G	missense_variant	MODERATE	MPN027	p.Phe139Leu	gene
1122	p2_2_S1	2	32628	0	57	55	2	3.63636	CGCG	AGCA	missense_variant	MODERATE	MPN027	p.ProArg132LeuLeu	gene
1123	p2_2_S1	2	32675	2.27168e-15	69	68	1	1.47059	T	A	missense_variant	MODERATE	MPN027	p.Glu117Asp	gene
1124	p2_2_S1	2	32723	3.49569e-15	88	86	2	2.32558	TAA	CAG	synonymous_variant	LOW	MPN027	p.102	gene
1125	p2_2_S1	2	32744	0	90	89	1	1.1236	TTGCCC	CTGTCT	missense_variant	MODERATE	MPN027	p.Gly93Arg	gene
1126	p2_2_S1	2	32754	0	84	83	1	1.20482	CAAAACCA	TATATCCG	missense_variant	MODERATE	MPN027	p.TrpPheCys89ArgIleTyr	gene
1127	p2_2_S1	2	32762	5.16819e-15	84	83	1	1.20482	A	T	synonymous_variant	LOW	MPN027	p.Gly88Gly	gene
1128	p2_2_S1	2	32765	1.60494e-15	92	91	1	1.0989	C	T	synonymous_variant	LOW	MPN027	p.Leu87Leu	gene
1129	p2_2_S1	2	32775	7.8022e-16	82	81	1	1.23457	TTGTTTTT	CTGCTCTC	missense_variant	MODERATE	MPN027	p.LysAsnLys82GluSerArg	gene
1130	p2_2_S1	2	32800	0	93	92	1	1.08696	G	A	synonymous_variant	LOW	MPN027	p.Leu76Leu	gene
1131	p2_2_S1	2	32808	1.19081e-15	89	88	1	1.13636	GGTTG	AGTTA	stop_gained	HIGH	MPN027	p.GlnPro72*	gene
1132	p2_2_S1	2	32817	3.64613e-15	86	85	1	1.17647	TTGTC	ATGTG	missense_variant	MODERATE	MPN027	p.AspLys69HisIle	gene
1133	p2_2_S1	2	32834	0	80	79	1	1.26582	C	T	synonymous_variant	LOW	MPN027	p.Leu64Leu	gene
1134	p2_2_S1	2	32859	3.59386e-15	67	66	1	1.51515	ATT	CTC	missense_variant	MODERATE	MPN027	p.Ile56Ser	gene
1135	p2_2_S1	2	32895	0	68	67	1	1.49254	C	T	missense_variant	MODERATE	MPN027	p.Arg44Gln	gene
1136	p2_2_S1	2	32896	2.0492e-15	65	64	1	1.5625	G	A	missense_variant	MODERATE	MPN027	p.Arg44Trp	gene
1137	p2_2_S1	2	32979	3.61646e-15	57	56	1	1.78571	TAAC	AAAT	missense_variant	MODERATE	MPN027	p.ArgTyr15HisPhe	gene
1138	p2_2_S1	2	33023	0	57	56	1	1.78571	CATTT	GATTA	initiator_codon_variant	LOW	MPN027	p.Met1?	gene
1139	p2_2_S1	2	33034	0	54	53	1	1.88679	TCTT	ACAA	upstream_gene_variant	MODIFIER	MPN027	c.-12_-9delAAGAinsTTGT	intergenic
1140	p2_2_S1	2	33072	2.18857e-15	56	55	1	1.81818	T	A	stop_gained	HIGH	MPN028	p.Tyr5*	gene
1141	p2_2_S1	2	33102	1.31112e-15	58	57	1	1.75439	TTGT	ATGG	missense_variant	MODERATE	MPN028	p.AsnCys15LysTrp	gene
1142	p2_2_S1	2	33121	6.20809e-15	62	59	3	5.08475	AA	GT	missense_variant	MODERATE	MPN028	p.Lys22Val	gene
1143	p2_2_S1	2	33147	0	59	58	1	1.72414	AGGTGAATATTTTACT	GGGTAAGTGTTCTACA	missense_variant	MODERATE	MPN028	p.GluTyrPhe32LysCysSer	gene
1144	p2_2_S1	2	33186	1.24543e-16	78	77	1	1.2987	T	A	missense_variant	MODERATE	MPN028	p.Asn43Lys	gene
1145	p2_2_S1	2	33202	2.39975e-15	87	86	1	1.16279	AAT	GAC	missense_variant	MODERATE	MPN028	p.Asn49Asp	gene
1146	p2_2_S1	2	33220	0	69	68	1	1.47059	GAACCCTATACCCA	AATCCCAATCCCCG	missense_variant	MODERATE	MPN028	p.GluProTyrThrGln55AsnProAsnProArg	gene
1147	p2_2_S1	2	33245	5.24377e-15	97	96	1	1.04167	A	G	missense_variant	MODERATE	MPN028	p.Asn63Ser	gene
1148	p2_2_S1	2	33375	0	68	67	1	1.49254	TCAAC	ACAAT	missense_variant	MODERATE	MPN028	p.PheGlnArg106LeuGlnCys	gene
1149	p2_2_S1	2	33394	0	66	65	1	1.53846	T	C	missense_variant	MODERATE	MPN028	p.Phe113Leu	gene
1150	p2_2_S1	2	33421	0	54	53	1	1.88679	T	C	missense_variant	MODERATE	MPN028	p.Phe122Leu	gene
1151	p2_2_S1	2	33453	0	47	46	1	2.17391	TTTTCT	AATTCA	missense_variant	MODERATE	MPN028	p.PheLeu133IleHis	gene
1152	p2_2_S1	2	33470	0	57	56	1	1.78571	T	C	missense_variant	MODERATE	MPN028	p.Phe138Ser	gene
1153	p2_2_S1	2	33523	0	73	72	1	1.38889	C	A	missense_variant	MODERATE	MPN028	p.Gln156Lys	gene
1154	p2_2_S1	2	33686	5.53005e-15	79	78	1	1.28205	C	T	missense_variant	MODERATE	MPN028	p.Pro210Leu	gene
1155	p2_2_S1	2	33731	0	96	95	1	1.05263	A	T	missense_variant	MODERATE	MPN028	p.Gln225Leu	gene
1156	p2_2_S1	2	33889	0	32	31	1	3.22581	TTAGCATT	ATAGTATA	missense_variant	MODERATE	MPN028	p.LeuAlaPhe278IleValTyr	gene
1157	p2_2_S1	2	33903	0	34	33	1	3.0303	T	A	missense_variant	MODERATE	MPN028	p.Phe282Leu	gene
1158	p2_2_S1	2	34007	0	55	54	1	1.85185	A	G	synonymous_variant	LOW	MPN029	p.Leu10Leu	gene
1159	p2_2_S1	2	34040	0	68	67	1	1.49254	A	G	synonymous_variant	LOW	MPN029	p.Lys21Lys	gene
1160	p2_2_S1	2	34047	3.14207e-15	64	62	2	3.22581	C	A	missense_variant	MODERATE	MPN029	p.Leu24Met	gene
1161	p2_2_S1	2	34048	0	62	60	2	3.33333	T	A	missense_variant	MODERATE	MPN029	p.Leu24Gln	gene
1162	p2_2_S1	2	34164	0	72	70	2	2.85714	T	A	missense_variant	MODERATE	MPN029	p.Leu63Ile	gene
1163	p2_2_S1	2	34181	0	68	67	1	1.49254	TGA	AGT	missense_variant	MODERATE	MPN029	p.Asp69Val	gene
1164	p2_2_S1	2	34201	3.9576e-16	69	68	1	1.47059	TCT	ACA	missense_variant	MODERATE	MPN029	p.PheLeu75TyrMet	gene
1165	p2_2_S1	2	34224	0	57	55	2	3.63636	TA	CT	missense_variant	MODERATE	MPN029	p.Tyr83Leu	gene
1166	p2_2_S1	2	34259	1.14938e-15	67	66	1	1.51515	T	A	synonymous_variant	LOW	MPN029	p.Ile94Ile	gene
1167	p2_2_S1	2	34289	6.14476e-16	73	72	1	1.38889	AAAGA	TAAGT	missense_variant	MODERATE	MPN029	p.GluLysAsn104AspLysTyr	gene
1168	p2_2_S1	2	34303	0	72	71	1	1.40845	C	A	missense_variant	MODERATE	MPN029	p.Thr109Asn	gene
1169	p2_2_S1	2	34307	0	70	68	2	2.94118	A	G	synonymous_variant	LOW	MPN029	p.Glu110Glu	gene
1170	p2_2_S1	2	34327	0	77	76	1	1.31579	T	C	missense_variant	MODERATE	MPN029	p.Ile117Thr	gene
1171	p2_2_S1	2	34367	4.61846e-15	75	73	2	2.73973	A	G	synonymous_variant	LOW	MPN029	p.Glu130Glu	gene
1172	p2_2_S1	2	34375	0	74	73	1	1.36986	CGAT	TGAA	missense_variant	MODERATE	MPN029	p.ProIle133LeuAsn	gene
1173	p2_2_S1	2	34397	0	73	71	2	2.8169	A	G	synonymous_variant	LOW	MPN029	p.Glu140Glu	gene
1174	p2_2_S1	2	34462	9.34428e-16	95	93	2	2.15054	A	G	missense_variant	MODERATE	MPN029	p.Glu162Gly	gene
1175	p2_2_S1	2	34468	2.10217e-15	87	86	1	1.16279	ATGT	GTGA	missense_variant	MODERATE	MPN029	p.AspVal164GlyGlu	gene
1176	p2_2_S1	2	34528	1.60494e-15	92	91	1	1.0989	A	T	missense_variant	MODERATE	MPN029	p.Tyr184Phe	gene
1177	p2_2_S1	2	34544	4.31734e-15	96	94	2	2.12766	C	T	missense_variant	MODERATE	MPN030	p.Thr26Ile	gene
1178	p2_2_S1	2	34559	0	80	79	1	1.26582	G	A	missense_variant	MODERATE	MPN030	p.Arg31Lys	gene
1179	p2_2_S1	2	34611	0	71	70	1	1.42857	T	C	synonymous_variant	LOW	MPN030	p.Phe48Phe	gene
1180	p2_2_S1	2	34627	0	76	75	1	1.33333	G	T	missense_variant	MODERATE	MPN030	p.Asp54Tyr	gene
1181	p2_2_S1	2	34635	3.00622e-15	76	75	1	1.33333	C	T	synonymous_variant	LOW	MPN030	p.Ile56Ile	gene
1182	p2_2_S1	2	34764	0	59	58	1	1.72414	CCA	TCT	missense_variant	MODERATE	MPN030	p.Gln100Leu	gene
1183	p2_2_S1	2	34774	0	66	65	1	1.53846	G	A	missense_variant	MODERATE	MPN030	p.Val103Ile	gene
1184	p2_2_S1	2	34778	4.92735e-15	60	58	2	3.44828	A	T	missense_variant	MODERATE	MPN030	p.Gln104Leu	gene
1185	p2_2_S1	2	34787	0	50	49	1	2.04082	A	T	missense_variant	MODERATE	MPN030	p.Tyr107Phe	gene
1186	p2_2_S1	2	34801	0	44	43	1	2.32558	G	A	missense_variant	MODERATE	MPN030	p.Gly112Ser	gene
1187	p2_2_S1	2	34840	1.52206e-15	59	57	2	3.50877	T	C	missense_variant	MODERATE	MPN030	p.Cys125Arg	gene
1188	p2_2_S1	2	34848	3.82741e-15	61	60	1	1.66667	G	A	synonymous_variant	LOW	MPN030	p.Leu127Leu	gene
1189	p2_2_S1	2	34865	1.06627e-15	56	55	1	1.81818	AAGCGACTG	TAGCTACCA	missense_variant	MODERATE	MPN030	p.GlnAlaThrAsp133LeuAlaThrAsn	gene
1190	p2_2_S1	2	34878	0	62	61	1	1.63934	A	T	missense_variant	MODERATE	MPN030	p.Lys137Asn	gene
1191	p2_2_S1	2	34896	2.63707e-15	58	57	1	1.75439	AGCCT	TGCCC	missense_variant	MODERATE	MPN030	p.Glu143Asp	gene
1192	p2_2_S1	2	34918	5.3191e-15	66	65	1	1.53846	TAT	AAC	missense_variant	MODERATE	MPN030	p.Tyr151Asn	gene
1193	p2_2_S1	2	34937	0	68	67	1	1.49254	AGA	TGT	stop_gained	HIGH	MPN030	p.LysLys157*	gene
1194	p2_2_S1	2	34950	3.05896e-15	70	69	1	1.44928	TGCT	AGCG	missense_variant	MODERATE	MPN030	p.His161Gln	gene
1195	p2_2_S1	2	34993	6.41904e-15	74	72	2	2.77778	A	G	missense_variant	MODERATE	MPN031	p.Glu7Gly	gene
1196	p2_2_S1	2	35085	3.54089e-15	79	78	1	1.28205	C	T	missense_variant	MODERATE	MPN031	p.Pro38Ser	gene
1197	p2_2_S1	2	35111	0	68	67	1	1.49254	A	G	synonymous_variant	LOW	MPN031	p.Thr46Thr	gene
1198	p2_2_S1	2	35116	5.87661e-15	68	67	1	1.49254	TTT	ATA	missense_variant	MODERATE	MPN031	p.PheLeu48TyrIle	gene
1199	p2_2_S1	2	35128	0	70	69	1	1.44928	T	A	missense_variant	MODERATE	MPN031	p.Val52Glu	gene
1200	p2_2_S1	2	35147	2.93089e-15	63	62	1	1.6129	C	A	stop_gained	HIGH	MPN031	p.Tyr58*	gene
1201	p2_2_S1	2	35153	0	66	65	1	1.53846	TGATGT	AAATGA	missense_variant	MODERATE	MPN031	p.PheAspVal60LeuAsnGlu	gene
1202	p2_2_S1	2	35244	3.82741e-15	61	60	1	1.66667	T	C	missense_variant	MODERATE	MPN031	p.Phe91Leu	gene
1203	p2_2_S1	2	35254	4.14595e-16	60	59	1	1.69492	A	G	missense_variant	MODERATE	MPN031	p.Asn94Ser	gene
1204	p2_2_S1	2	35262	2.50546e-15	56	55	1	1.81818	GTTAA	ATTAT	missense_variant	MODERATE	MPN031	p.ValAsn97IleIle	gene
1205	p2_2_S1	2	35298	4.14595e-16	60	59	1	1.69492	A	G	missense_variant	MODERATE	MPN031	p.Met109Val	gene
1206	p2_2_S1	2	35301	3.1908e-15	61	60	1	1.66667	ACCAA	GCCAG	missense_variant	MODERATE	MPN031	p.ThrAsn110AlaSer	gene
1207	p2_2_S1	2	35314	6.70532e-15	56	54	2	3.7037	T	C	missense_variant	MODERATE	MPN031	p.Leu114Pro	gene
1208	p2_2_S1	2	35315	0	57	56	1	1.78571	T	C	synonymous_variant	LOW	MPN031	p.Leu114Leu	gene
1209	p2_2_S1	2	35346	3.59386e-15	67	66	1	1.51515	GCTTA	TCTTT	missense_variant	MODERATE	MPN031	p.AlaTyr125SerPhe	gene
1210	p2_2_S1	2	35401	0	62	61	1	1.63934	G	A	missense_variant	MODERATE	MPN031	p.Ser143Asn	gene
1211	p2_2_S1	2	35433	0	55	54	1	1.85185	A	G	missense_variant	MODERATE	MPN031	p.Ile154Val	gene
1212	p2_2_S1	2	35434	5.60515e-15	57	56	1	1.78571	T	C	missense_variant	MODERATE	MPN031	p.Ile154Thr	gene
1213	p2_2_S1	2	35503	3.82741e-15	61	60	1	1.66667	T	A	missense_variant	MODERATE	MPN031	p.Val177Glu	gene
1214	p2_2_S1	2	35515	2.0492e-15	65	64	1	1.5625	T	C	missense_variant	MODERATE	MPN031	p.Leu181Ser	gene
1215	p2_2_S1	2	35584	0	80	78	2	2.5641	A	G	upstream_gene_variant	MODIFIER	MPN027	c.-2559T>C	intergenic
1216	p2_2_S1	2	35587	5.53005e-15	79	78	1	1.28205	T	C	upstream_gene_variant	MODIFIER	MPN027	c.-2562A>G	intergenic
1217	p2_2_S1	2	35588	0	79	78	1	1.28205	TCGT	ACGA	upstream_gene_variant	MODIFIER	MPN027	c.-2566_-2563delACGAinsTCGT	intergenic
1218	p2_2_S1	2	35615	0	76	75	1	1.33333	A	G	upstream_gene_variant	MODIFIER	MPN027	c.-2590T>C	intergenic
1219	p2_2_S1	2	35619	1.74784e-15	83	82	1	1.21951	C	A	upstream_gene_variant	MODIFIER	MPN027	c.-2594G>T	intergenic
1220	p2_2_S1	2	35662	0	62	61	1	1.63934	T	A	upstream_gene_variant	MODIFIER	MPN027	c.-2637A>T	intergenic
1221	p2_2_S1	2	35687	0	77	76	1	1.31579	CTAC	GTAT	upstream_gene_variant	MODIFIER	MPN027	c.-2665_-2662delGTAGinsATAC	intergenic
1222	p2_2_S1	2	35696	6.41151e-15	74	72	2	2.77778	G	A	upstream_gene_variant	MODIFIER	MPN027	c.-2671C>T	intergenic
1223	p2_2_S1	2	35697	1.38669e-15	71	70	1	1.42857	T	G	upstream_gene_variant	MODIFIER	MPN027	c.-2672A>C	intergenic
1224	p2_2_S1	2	35819	0	72	71	1	1.40845	TTG	ATA	missense_variant	MODERATE	MPN032	p.Asn106Ile	gene
1225	p2_2_S1	2	35823	7.3231e-15	75	74	1	1.35135	G	T	missense_variant	MODERATE	MPN032	p.Pro105Thr	gene
1226	p2_2_S1	2	35838	0	62	61	1	1.63934	C	T	missense_variant	MODERATE	MPN032	p.Ala100Thr	gene
1227	p2_2_S1	2	35846	0	65	64	1	1.5625	T	C	missense_variant	MODERATE	MPN032	p.Tyr97Cys	gene
1228	p2_2_S1	2	35863	0	61	60	1	1.66667	AAA	TAT	missense_variant	MODERATE	MPN032	p.Phe91Ile	gene
1229	p2_2_S1	2	35871	3.68403e-15	70	69	1	1.44928	G	T	missense_variant	MODERATE	MPN032	p.Arg89Ser	gene
1230	p2_2_S1	2	35899	0	76	75	1	1.33333	G	C	missense_variant	MODERATE	MPN032	p.Asp79Glu	gene
1231	p2_2_S1	2	35914	2.29781e-15	63	62	1	1.6129	AGCTC	TGCTT	missense_variant	MODERATE	MPN032	p.Gly73Glu	gene
1232	p2_2_S1	2	35935	2.24884e-15	78	77	1	1.2987	AAAG	TAAC	missense_variant	MODERATE	MPN032	p.Phe67Leu	gene
1233	p2_2_S1	2	35973	5.83164e-15	61	60	1	1.66667	T	G	missense_variant	MODERATE	MPN032	p.Thr55Pro	gene
1234	p2_2_S1	2	35988	0	52	51	1	1.96078	AAGTT	TAGTC	missense_variant	MODERATE	MPN032	p.Leu50Ile	gene
1235	p2_2_S1	2	36000	0	57	56	1	1.78571	T	C	missense_variant	MODERATE	MPN032	p.Asn46Asp	gene
1236	p2_2_S1	2	36016	5.65271e-16	51	50	1	2	A	T	missense_variant	MODERATE	MPN032	p.Ser40Arg	gene
1237	p2_2_S1	2	36108	4.92735e-15	60	58	2	3.44828	G	T	missense_variant	MODERATE	MPN032	p.Pro10Thr	gene
1238	p2_2_S1	2	36137	2.0492e-15	65	64	1	1.5625	T	A	upstream_gene_variant	MODIFIER	MPN027	c.-3112A>T	intergenic
1239	p2_2_S1	2	36144	0	64	63	1	1.5873	T	A	stop_gained	HIGH	MPN033	p.Lys206*	gene
1240	p2_2_S1	2	36149	0	62	61	1	1.63934	C	T	missense_variant	MODERATE	MPN033	p.Gly204Asp	gene
1241	p2_2_S1	2	36158	3.1908e-15	61	60	1	1.66667	CGATCCCC	TGATGCCG	missense_variant	MODERATE	MPN033	p.GlyAspArg199ArgHisHis	gene
1242	p2_2_S1	2	36172	0	66	65	1	1.53846	A	C	synonymous_variant	LOW	MPN033	p.Gly196Gly	gene
1243	p2_2_S1	2	36178	3.05896e-15	61	59	2	3.38983	CCCGG	CTCGA	missense_variant	MODERATE	MPN033	p.ProGly193LeuGlu	gene
1244	p2_2_S1	2	36185	0	63	62	1	1.6129	ATA	TTT	missense_variant	MODERATE	MPN033	p.Ile192Asn	gene
1245	p2_2_S1	2	36193	0	65	64	1	1.5625	A	G	synonymous_variant	LOW	MPN033	p.Asn189Asn	gene
1246	p2_2_S1	2	36268	9.26894e-16	65	64	1	1.5625	AATGCCC	TATGTCT	missense_variant	MODERATE	MPN033	p.Gly163Asp	gene
1247	p2_2_S1	2	36281	5.68049e-15	70	69	1	1.44928	G	A	missense_variant	MODERATE	MPN033	p.Ala160Val	gene
1248	p2_2_S1	2	36321	1.76315e-15	83	82	1	1.21951	T	C	missense_variant	MODERATE	MPN033	p.Asn147Asp	gene
1249	p2_2_S1	2	36322	7.16442e-15	84	83	1	1.20482	C	T	synonymous_variant	LOW	MPN033	p.Lys146Lys	gene
1250	p2_2_S1	2	36337	1.58445e-16	86	85	1	1.17647	AATGG	GATGA	missense_variant	MODERATE	MPN033	p.Ala140Val	gene
1251	p2_2_S1	2	36419	2.48992e-15	90	89	1	1.1236	T	A	missense_variant	MODERATE	MPN033	p.Lys114Ile	gene
1252	p2_2_S1	2	36424	3.39257e-16	82	81	1	1.23457	A	G	synonymous_variant	LOW	MPN033	p.Tyr112Tyr	gene
1253	p2_2_S1	2	36470	3.52982e-15	79	78	1	1.28205	A	G	missense_variant	MODERATE	MPN033	p.Leu97Ser	gene
1254	p2_2_S1	2	36529	0	53	52	1	1.92308	AGCG	TGCA	synonymous_variant	LOW	MPN033	p.78	gene
1255	p2_2_S1	2	36621	0	59	58	1	1.72414	G	T	missense_variant	MODERATE	MPN033	p.Pro47Thr	gene
1256	p2_2_S1	2	36628	0	58	57	1	1.75439	C	T	synonymous_variant	LOW	MPN033	p.Lys44Lys	gene
1257	p2_2_S1	2	36676	2.31288e-15	63	62	1	1.6129	CCGA	TCGT	missense_variant	MODERATE	MPN033	p.Phe27Leu	gene
1258	p2_2_S1	2	36687	1.16798e-15	62	61	1	1.63934	AGGA	TGGT	missense_variant	MODERATE	MPN033	p.SerSer24ThrThr	gene
1259	p2_2_S1	2	36694	7.45871e-15	66	65	1	1.53846	A	G	synonymous_variant	LOW	MPN033	p.Ser22Ser	gene
1260	p2_2_S1	2	36714	3.82741e-15	61	60	1	1.66667	T	C	missense_variant	MODERATE	MPN033	p.Lys16Glu	gene
1261	p2_2_S1	2	36905	2.0492e-15	65	64	1	1.5625	T	C	missense_variant	MODERATE	MPN034	p.Asp1409Gly	essential
1262	p2_2_S1	2	36951	2.94643e-15	63	62	1	1.6129	A	T	missense_variant	MODERATE	MPN034	p.Ser1394Thr	essential
1263	p2_2_S1	2	36980	1.13031e-15	57	55	2	3.63636	ATCGT	GTCGC	missense_variant	MODERATE	MPN034	p.ThrIle1383AlaThr	essential
1264	p2_2_S1	2	36994	0	50	49	1	2.04082	GGC	AGT	missense_variant	MODERATE	MPN034	p.Ala1379Thr	essential
1265	p2_2_S1	2	37007	0	58	56	2	3.57143	C	G	missense_variant	MODERATE	MPN034	p.Gly1375Ala	essential
1266	p2_2_S1	2	37015	0	63	62	1	1.6129	C	A	missense_variant	MODERATE	MPN034	p.Glu1372Asp	essential
1267	p2_2_S1	2	37034	0	66	65	1	1.53846	TGGGA	GGGGG	missense_variant	MODERATE	MPN034	p.SerHis1365ProPro	essential
1268	p2_2_S1	2	37091	7.3231e-15	75	74	1	1.35135	T	A	missense_variant	MODERATE	MPN034	p.Tyr1347Phe	essential
1269	p2_2_S1	2	37108	3.68403e-15	70	69	1	1.44928	T	A	missense_variant	MODERATE	MPN034	p.Leu1341Phe	essential
1270	p2_2_S1	2	37145	3.72194e-15	92	91	1	1.0989	CGGT	GGGC	missense_variant	MODERATE	MPN034	p.TyrArg1328CysPro	essential
1271	p2_2_S1	2	37179	0	72	71	1	1.40845	TGA	TA	frameshift_variant	HIGH	MPN034	p.Lys1318fs	essential
1272	p2_2_S1	2	37196	1.21341e-15	77	75	2	2.66667	G	A	missense_variant	MODERATE	MPN034	p.Ser1312Leu	essential
1273	p2_2_S1	2	37282	3.83471e-15	61	60	1	1.66667	G	A	synonymous_variant	LOW	MPN034	p.Ala1283Ala	essential
1274	p2_2_S1	2	37287	2.53936e-15	60	59	1	1.69492	TTCGTC	ATCGCT	stop_gained	HIGH	MPN034	p.TrpArgIle1280*	essential
1275	p2_2_S1	2	37333	2.19634e-15	56	55	1	1.81818	C	A	synonymous_variant	LOW	MPN034	p.Leu1266Leu	essential
1276	p2_2_S1	2	37361	2.93089e-15	63	62	1	1.6129	A	G	missense_variant	MODERATE	MPN034	p.Ile1257Thr	essential
1277	p2_2_S1	2	37428	1.16421e-15	67	66	1	1.51515	T	C	missense_variant	MODERATE	MPN034	p.Lys1235Glu	essential
1278	p2_2_S1	2	37482	0	66	65	1	1.53846	T	A	missense_variant	MODERATE	MPN034	p.Ile1217Phe	essential
1279	p2_2_S1	2	37511	2.04566e-15	62	61	1	1.63934	GCAATTA	ACATTTT	missense_variant	MODERATE	MPN034	p.ValIleAla1205GluAsnVal	essential
1280	p2_2_S1	2	37701	0	65	64	1	1.5625	CATCT	AATCA	stop_gained	HIGH	MPN034	p.LeuAspGlu1142*	essential
1281	p2_2_S1	2	37714	0	54	52	2	3.84615	C	T	synonymous_variant	LOW	MPN034	p.Pro1139Pro	essential
1282	p2_2_S1	2	37722	5.8241e-15	61	60	1	1.66667	G	A	synonymous_variant	LOW	MPN034	p.Leu1137Leu	essential
1283	p2_2_S1	2	37731	0	62	57	5	8.77193	GATTGACC	AATAGACT	missense_variant	MODERATE	MPN034	p.AsnPro1133TyrSer	essential
1284	p2_2_S1	2	37755	1.28852e-15	67	66	1	1.51515	TGAGCT	AGTGCA	missense_variant	MODERATE	MPN034	p.LysLeuThr1124MetHisSer	essential
1285	p2_2_S1	2	37774	1.05897e-15	64	63	1	1.5873	GGG	AGA	missense_variant	MODERATE	MPN034	p.Pro1119Ser	essential
1286	p2_2_S1	2	37807	0	79	78	1	1.28205	GGCC	AGCT	synonymous_variant	LOW	MPN034	p.1109	essential
1287	p2_2_S1	2	37825	0	72	71	1	1.40845	A	T	synonymous_variant	LOW	MPN034	p.Thr1102Thr	essential
1288	p2_2_S1	2	37836	6.42657e-15	74	72	2	2.77778	C	A	missense_variant	MODERATE	MPN034	p.Asp1099Tyr	essential
1289	p2_2_S1	2	37840	0	77	76	1	1.31579	G	C	synonymous_variant	LOW	MPN034	p.Gly1097Gly	essential
1290	p2_2_S1	2	37870	0	75	74	1	1.35135	CCCT	TCCA	missense_variant	MODERATE	MPN034	p.Leu1086Phe	essential
1291	p2_2_S1	2	37885	1.00977e-15	76	75	1	1.33333	T	C	synonymous_variant	LOW	MPN034	p.Glu1082Glu	essential
1292	p2_2_S1	2	37896	0	68	67	1	1.49254	TCGTT	CCGTA	missense_variant	MODERATE	MPN034	p.LysThrThr1077AsnThrAla	essential
1293	p2_2_S1	2	37984	0	42	39	3	7.69231	CCCCCCG	CTCTCCG	missense_variant	MODERATE	MPN034	p.Gly1049Glu	essential
1294	p2_2_S1	2	38014	0	53	52	1	1.92308	A	G	synonymous_variant	LOW	MPN034	p.Ile1039Ile	essential
1295	p2_2_S1	2	38029	3.08156e-15	54	53	1	1.88679	T	C	synonymous_variant	LOW	MPN034	p.Gln1034Gln	essential
1296	p2_2_S1	2	38083	0	50	49	1	2.04082	T	C	synonymous_variant	LOW	MPN034	p.Glu1016Glu	essential
1297	p2_2_S1	2	38106	0	52	51	1	1.96078	CGTAAGCCGTTTTTTCG	CGTAAGTCGATTTATCA	missense_variant	MODERATE	MPN034	p.GluLysThrAla1004AspLysSerThr	essential
1298	p2_2_S1	2	38135	2.41129e-15	60	59	1	1.69492	A	T	missense_variant	MODERATE	MPN034	p.Ile999Asn	essential
1299	p2_2_S1	2	38158	2.93842e-15	63	62	1	1.6129	C	T	synonymous_variant	LOW	MPN034	p.Gln991Gln	essential
1300	p2_2_S1	2	38196	2.39622e-15	58	56	2	3.57143	TGGCT	CGGCA	missense_variant	MODERATE	MPN034	p.GlnAlaLys977HisAlaGlu	essential
1301	p2_2_S1	2	38219	0	65	63	2	3.1746	T	C	missense_variant	MODERATE	MPN034	p.Asn971Ser	essential
1302	p2_2_S1	2	38226	4.97467e-16	73	72	1	1.38889	C	T	missense_variant	MODERATE	MPN034	p.Asp969Asn	essential
1303	p2_2_S1	2	38228	0	77	75	2	2.66667	ATA	CTG	missense_variant	MODERATE	MPN034	p.Ile968Ser	essential
1304	p2_2_S1	2	38286	3.46791e-16	82	81	1	1.23457	C	T	missense_variant	MODERATE	MPN034	p.Gly949Ser	essential
1305	p2_2_S1	2	38297	2.48992e-15	90	89	1	1.1236	A	T	missense_variant	MODERATE	MPN034	p.Phe945Tyr	essential
1306	p2_2_S1	2	38340	0	82	81	1	1.23457	G	A	missense_variant	MODERATE	MPN034	p.Leu931Phe	essential
1307	p2_2_S1	2	38410	0	68	67	1	1.49254	TAAGGGATTAATT	CAAGAGATCACTA	missense_variant	MODERATE	MPN034	p.GluIleAsnPro903AspSerAspLeu	essential
1308	p2_2_S1	2	38435	0	73	71	2	2.8169	ATCAG	AACAA	missense_variant	MODERATE	MPN034	p.Ile899Phe	essential
1309	p2_2_S1	2	38445	2.05296e-15	60	59	1	1.69492	CTAC	GTGT	missense_variant	MODERATE	MPN034	p.ValAla895ThrPro	essential
1310	p2_2_S1	2	38475	3.68403e-15	70	69	1	1.44928	G	A	missense_variant	MODERATE	MPN034	p.Pro886Ser	essential
1311	p2_2_S1	2	38484	2.18857e-15	56	55	1	1.81818	A	T	missense_variant	MODERATE	MPN034	p.Phe883Ile	essential
1312	p2_2_S1	2	38494	0	59	58	1	1.72414	TTGAA	CTGAT	missense_variant	MODERATE	MPN034	p.Val878Asp	essential
1313	p2_2_S1	2	38521	0	56	55	1	1.81818	G	A	synonymous_variant	LOW	MPN034	p.Ser870Ser	essential
1314	p2_2_S1	2	38522	0	53	52	1	1.92308	G	C	missense_variant	MODERATE	MPN034	p.Ser870Cys	essential
1315	p2_2_S1	2	38535	0	54	52	2	3.84615	T	A	missense_variant	MODERATE	MPN034	p.Ile866Phe	essential
1316	p2_2_S1	2	38537	0	50	49	1	2.04082	A	T	missense_variant	MODERATE	MPN034	p.Ile865Asn	essential
1317	p2_2_S1	2	38559	0	49	48	1	2.08333	TCGCT	ACGCC	missense_variant	MODERATE	MPN034	p.Ile858Phe	essential
1318	p2_2_S1	2	38565	1.63884e-15	62	61	1	1.63934	TTAA	CTAG	missense_variant	MODERATE	MPN034	p.Lys856Glu	essential
1319	p2_2_S1	2	38576	2.0492e-15	65	64	1	1.5625	T	A	missense_variant	MODERATE	MPN034	p.Gln852Leu	essential
1320	p2_2_S1	2	38607	0	63	62	1	1.6129	GATC	AATT	missense_variant	MODERATE	MPN034	p.AspPro841AsnSer	essential
1321	p2_2_S1	2	38622	1.19081e-15	74	72	2	2.77778	C	T	missense_variant	MODERATE	MPN034	p.Ala837Thr	essential
1322	p2_2_S1	2	38669	0	65	64	1	1.5625	TCAA	ACAG	missense_variant	MODERATE	MPN034	p.IleGlu820ThrVal	essential
1323	p2_2_S1	2	38678	5.83164e-15	61	60	1	1.66667	G	A	missense_variant	MODERATE	MPN034	p.Pro818Leu	essential
1324	p2_2_S1	2	38725	5.49968e-16	48	47	1	2.12766	TTGTTTC	ATGATTT	missense_variant	MODERATE	MPN034	p.LysGln801AsnHis	essential
1325	p2_2_S1	2	38783	0	43	42	1	2.38095	A	G	missense_variant	MODERATE	MPN034	p.Leu783Ser	essential
1326	p2_2_S1	2	38784	1.28075e-16	44	43	1	2.32558	AAAAA	TAAAT	missense_variant	MODERATE	MPN034	p.SerPheLeu781ArgPheIle	essential
1327	p2_2_S1	2	38837	3.06626e-15	54	53	1	1.88679	A	G	missense_variant	MODERATE	MPN034	p.Val765Ala	essential
1328	p2_2_S1	2	38857	0	65	64	1	1.5625	ATA	GTG	missense_variant	MODERATE	MPN034	p.Tyr758His	essential
1329	p2_2_S1	2	38869	1.14938e-15	67	66	1	1.51515	A	G	synonymous_variant	LOW	MPN034	p.Arg754Arg	essential
1330	p2_2_S1	2	38884	0	68	67	1	1.49254	A	C	synonymous_variant	LOW	MPN034	p.Gly749Gly	essential
1331	p2_2_S1	2	38897	0	72	71	1	1.40845	G	A	missense_variant	MODERATE	MPN034	p.Ala745Val	essential
1332	p2_2_S1	2	38922	0	73	72	1	1.38889	C	T	missense_variant	MODERATE	MPN034	p.Glu737Lys	essential
1333	p2_2_S1	2	38943	2.0492e-15	74	73	1	1.36986	AGTA	GGTG	missense_variant	MODERATE	MPN034	p.TyrPhe729HisLeu	essential
1334	p2_2_S1	2	38955	1.01753e-15	76	75	1	1.33333	A	T	missense_variant	MODERATE	MPN034	p.Ser726Thr	essential
1335	p2_2_S1	2	38976	0	69	68	1	1.47059	TGAGTCT	CAACTCG	missense_variant	MODERATE	MPN034	p.LeuAsn718ValAsp	essential
1336	p2_2_S1	2	38986	4.89698e-16	73	72	1	1.38889	G	A	synonymous_variant	LOW	MPN034	p.Ala715Ala	essential
1337	p2_2_S1	2	39002	3.39045e-15	79	77	2	2.5974	AACTTAA	TACCTAG	stop_gained	HIGH	MPN034	p.IleLysLeu708*	essential
1338	p2_2_S1	2	39042	3.00622e-15	73	71	2	2.8169	C	A	stop_gained	HIGH	MPN034	p.Glu697*	essential
1339	p2_2_S1	2	39045	3.91758e-15	74	73	1	1.36986	T	C	missense_variant	MODERATE	MPN034	p.Arg696Gly	essential
1340	p2_2_S1	2	39050	0	79	77	2	2.5974	G	A	missense_variant	MODERATE	MPN034	p.Thr694Ile	essential
1341	p2_2_S1	2	39104	3.82741e-15	61	60	1	1.66667	A	G	missense_variant	MODERATE	MPN034	p.Ile676Thr	essential
1342	p2_2_S1	2	39129	2.0492e-15	65	64	1	1.5625	G	A	missense_variant	MODERATE	MPN034	p.Pro668Ser	essential
1343	p2_2_S1	2	39140	0	68	67	1	1.49254	G	A	missense_variant	MODERATE	MPN034	p.Ala664Val	essential
1344	p2_2_S1	2	39182	3.43918e-15	76	75	1	1.33333	ACA	TCT	missense_variant	MODERATE	MPN034	p.PheVal649LeuAsp	essential
1345	p2_2_S1	2	39213	0	78	75	3	4	AAGTT	GAGTA	missense_variant	MODERATE	MPN034	p.LeuThrSer638PheThrPro	essential
1346	p2_2_S1	2	39237	0	91	90	1	1.11111	CGTTG	TATTA	missense_variant	MODERATE	MPN034	p.Ala632Thr	essential
1347	p2_2_S1	2	39268	0	100	99	1	1.0101	T	C	synonymous_variant	LOW	MPN034	p.Glu621Glu	essential
1348	p2_2_S1	2	39277	0	94	92	2	2.17391	T	C	synonymous_variant	LOW	MPN034	p.Lys618Lys	essential
1349	p2_2_S1	2	39285	2.40776e-15	87	86	1	1.16279	ACC	TCT	missense_variant	MODERATE	MPN034	p.GlyPhe615GluIle	essential
1350	p2_2_S1	2	39300	0	84	83	1	1.20482	TAA	AAG	stop_gained	HIGH	MPN034	p.IleLys610*	essential
1351	p2_2_S1	2	39306	0	85	84	1	1.19048	A	C	missense_variant	MODERATE	MPN034	p.Tyr609Asp	essential
1352	p2_2_S1	2	39308	0	83	82	1	1.21951	ATAA	GTAG	missense_variant	MODERATE	MPN034	p.IleIle607ThrThr	essential
1353	p2_2_S1	2	39320	0	84	83	1	1.20482	T	C	missense_variant	MODERATE	MPN034	p.Asn604Ser	essential
1354	p2_2_S1	2	39324	0	81	80	1	1.25	TAAAAGTGCG	CATTAGTACA	missense_variant	MODERATE	MPN034	p.ArgThrPheThr600CysThrAsnAla	essential
1355	p2_2_S1	2	39374	0	75	74	1	1.35135	T	C	missense_variant	MODERATE	MPN034	p.Asp586Gly	essential
1356	p2_2_S1	2	39408	0	59	58	1	1.72414	C	T	missense_variant	MODERATE	MPN034	p.Glu575Lys	essential
1357	p2_2_S1	2	39460	2.93089e-15	63	62	1	1.6129	A	G	synonymous_variant	LOW	MPN034	p.Asp557Asp	essential
1358	p2_2_S1	2	39462	1.55973e-15	68	66	2	3.0303	CCGCTCG	CTGGTCG	missense_variant	MODERATE	MPN034	p.Ala556Pro	essential
1359	p2_2_S1	2	39488	2.80281e-15	67	66	1	1.51515	AAGT	GAGA	missense_variant	MODERATE	MPN034	p.AspPhe547ValSer	essential
1360	p2_2_S1	2	39539	6.23846e-15	67	64	3	4.6875	CCGGGATT	TCTGGATT	missense_variant	MODERATE	MPN034	p.Gly531Glu	essential
1361	p2_2_S1	2	39564	4.89698e-16	73	72	1	1.38889	C	T	missense_variant	MODERATE	MPN034	p.Ala523Thr	essential
1362	p2_2_S1	2	39596	0	51	49	2	4.08163	GCAA	GTAG	missense_variant	MODERATE	MPN034	p.IleAla511ThrThr	essential
1363	p2_2_S1	2	39602	3.0891e-15	54	53	1	1.88679	T	C	missense_variant	MODERATE	MPN034	p.Asn510Ser	essential
1364	p2_2_S1	2	39607	0	54	52	2	3.84615	TTT	ATA	missense_variant	MODERATE	MPN034	p.Lys508Tyr	essential
1365	p2_2_S1	2	39635	0	53	52	1	1.92308	A	T	stop_gained	HIGH	MPN034	p.Leu499*	essential
1366	p2_2_S1	2	39648	1.29605e-15	58	57	1	1.75439	A	G	synonymous_variant	LOW	MPN034	p.Leu495Leu	essential
1367	p2_2_S1	2	39715	0	56	55	1	1.81818	T	C	synonymous_variant	LOW	MPN034	p.Glu472Glu	essential
1368	p2_2_S1	2	39896	0	50	49	1	2.04082	TCGAA	ACGAT	missense_variant	MODERATE	MPN034	p.PheAsp411IleVal	essential
1369	p2_2_S1	2	39976	0	55	53	2	3.77358	A	G	synonymous_variant	LOW	MPN034	p.Cys385Cys	essential
1370	p2_2_S1	2	39992	2.0492e-15	65	64	1	1.5625	A	G	missense_variant	MODERATE	MPN034	p.Ile380Thr	essential
1371	p2_2_S1	2	40026	2.19634e-15	56	55	1	1.81818	A	G	missense_variant	MODERATE	MPN034	p.Tyr369His	essential
1372	p2_2_S1	2	40073	0	71	70	1	1.42857	G	A	missense_variant	MODERATE	MPN034	p.Thr353Ile	essential
1373	p2_2_S1	2	40100	0	66	65	1	1.53846	T	G	missense_variant	MODERATE	MPN034	p.Gln344Pro	essential
1374	p2_2_S1	2	40104	0	70	69	1	1.44928	C	T	missense_variant	MODERATE	MPN034	p.Ala343Thr	essential
1375	p2_2_S1	2	40108	2.64484e-15	81	80	1	1.25	T	C	synonymous_variant	LOW	MPN034	p.Glu341Glu	essential
1376	p2_2_S1	2	40282	0	89	88	1	1.13636	CGTGG	TGTGA	missense_variant	MODERATE	MPN034	p.Ala282Val	essential
1377	p2_2_S1	2	40290	1.97409e-15	87	86	1	1.16279	T	C	missense_variant	MODERATE	MPN034	p.Lys281Glu	essential
1378	p2_2_S1	2	40372	0	60	58	2	3.44828	G	A	synonymous_variant	LOW	MPN034	p.Phe253Phe	essential
1379	p2_2_S1	2	40388	0	57	56	1	1.78571	ATAT	GTAC	missense_variant	MODERATE	MPN034	p.AsnIle247SerThr	essential
1380	p2_2_S1	2	40400	0	55	53	2	3.77358	TTACG	CTACA	missense_variant	MODERATE	MPN034	p.ArgAsn243CysSer	essential
1381	p2_2_S1	2	40425	0	45	44	1	2.27273	AGT	TGA	missense_variant	MODERATE	MPN034	p.AspPhe235ValIle	essential
1382	p2_2_S1	2	40429	0	48	47	1	2.12766	CTTT	TTTC	synonymous_variant	LOW	MPN034	p.235	essential
1383	p2_2_S1	2	40454	1.29605e-15	58	57	1	1.75439	A	T	missense_variant	MODERATE	MPN034	p.Leu226Gln	essential
1384	p2_2_S1	2	40460	0	58	56	2	3.57143	A	G	missense_variant	MODERATE	MPN034	p.Ile224Thr	essential
1385	p2_2_S1	2	40461	0	57	56	1	1.78571	T	A	missense_variant	MODERATE	MPN034	p.Ile224Phe	essential
1386	p2_2_S1	2	40485	0	56	55	1	1.81818	T	A	stop_gained	HIGH	MPN034	p.Lys216*	essential
1387	p2_2_S1	2	40533	1.88345e-16	56	55	1	1.81818	TGTC	AGTT	stop_gained	HIGH	MPN034	p.AspLys199*	essential
1388	p2_2_S1	2	40547	0	57	56	1	1.78571	ACCTTCAT	GCCATCAC	missense_variant	MODERATE	MPN034	p.MetLysVal193ValMetAla	essential
1389	p2_2_S1	2	40575	0	59	58	1	1.72414	TTTCC	ATTGT	stop_gained	HIGH	MPN034	p.GluLys185*	essential
1390	p2_2_S1	2	40643	0	52	51	1	1.96078	A	G	missense_variant	MODERATE	MPN034	p.Ile163Thr	essential
1391	p2_2_S1	2	40651	0	53	51	2	3.92157	T	C	synonymous_variant	LOW	MPN034	p.Gln160Gln	essential
1392	p2_2_S1	2	40678	0	64	61	3	4.91803	TAATT	AAATA	missense_variant	MODERATE	MPN034	p.GluLeu150ValPhe	essential
1393	p2_2_S1	2	40771	3.54489e-15	79	78	1	1.28205	C	T	synonymous_variant	LOW	MPN034	p.Lys120Lys	essential
1394	p2_2_S1	2	40850	2.80281e-15	72	71	1	1.40845	T	C	missense_variant	MODERATE	MPN034	p.Lys94Arg	essential
1395	p2_2_S1	2	40883	3.29251e-15	85	84	1	1.19048	CTC	TTT	missense_variant	MODERATE	MPN034	p.Arg83Lys	essential
1396	p2_2_S1	2	40903	0	72	70	2	2.85714	ATCC	GTGG	missense_variant	MODERATE	MPN034	p.GlnAsp75HisHis	essential
1397	p2_2_S1	2	40920	0	77	76	1	1.31579	ACA	TCT	missense_variant	MODERATE	MPN034	p.LeuTyr70GlnAsn	essential
1398	p2_2_S1	2	40962	2.71688e-16	69	68	1	1.47059	T	C	missense_variant	MODERATE	MPN034	p.Thr57Ala	essential
1399	p2_2_S1	2	40966	0	67	64	3	4.6875	C	A	synonymous_variant	LOW	MPN034	p.Ala55Ala	essential
1400	p2_2_S1	2	40988	5.72593e-15	64	63	1	1.5873	TCGCG	ACGCA	missense_variant	MODERATE	MPN034	p.ArgGlu47CysVal	essential
1401	p2_2_S1	2	41040	2.71688e-16	69	68	1	1.47059	A	T	missense_variant	MODERATE	MPN034	p.Leu31Met	essential
1402	p2_2_S1	2	41048	7.68684e-16	64	63	1	1.5873	TGATC	AGATA	missense_variant	MODERATE	MPN034	p.AspHis27TyrLeu	essential
1403	p2_2_S1	2	41056	6.54711e-15	65	63	2	3.1746	A	G	synonymous_variant	LOW	MPN034	p.Ile25Ile	essential
1404	p2_2_S1	2	41067	2.19634e-15	56	55	1	1.81818	T	C	missense_variant	MODERATE	MPN034	p.Lys22Glu	essential
1405	p2_2_S1	2	41080	7.3231e-15	75	74	1	1.35135	T	A	synonymous_variant	LOW	MPN034	p.Ser17Ser	essential
1406	p2_2_S1	2	41089	0	75	74	1	1.35135	TCAAATGCGT	ATAAAAGCGA	missense_variant	MODERATE	MPN034	p.LysArgIleTrp11AsnArgPheTyr	essential
1407	p2_2_S1	2	41122	3.39257e-16	82	81	1	1.23457	G	T	missense_variant	MODERATE	MPN034	p.Phe3Leu	essential
1408	p2_2_S1	2	41132	7.16183e-16	94	93	1	1.07527	T	A	upstream_gene_variant	MODIFIER	MPN032	c.-4997A>T	intergenic
1409	p2_2_S1	2	41137	6.7955e-15	89	88	1	1.13636	T	A	upstream_gene_variant	MODIFIER	MPN033	c.-4378A>T	intergenic
1410	p2_2_S1	2	41151	1.75538e-15	83	82	1	1.21951	T	A	upstream_gene_variant	MODIFIER	MPN033	c.-4392A>T	intergenic
1411	p2_2_S1	2	41162	0	76	75	1	1.33333	AGGT	TGGA	upstream_gene_variant	MODIFIER	MPN033	c.-4406_-4403delACCTinsTCCA	intergenic
1412	p2_2_S1	2	41167	2.0492e-15	65	64	1	1.5625	A	T	upstream_gene_variant	MODIFIER	MPN033	c.-4408T>A	intergenic
1413	p2_2_S1	2	41223	0	41	40	1	2.5	A	G	upstream_gene_variant	MODIFIER	MPN033	c.-4464T>C	intergenic
1414	p2_2_S1	2	41265	1.65791e-15	50	48	2	4.16667	CTTTTTCA	CTTTTCA	upstream_gene_variant	MODIFIER	MPN033	c.-4511delA	intergenic
1415	p2_2_S1	2	41416	8.21656e-16	49	48	1	2.08333	GTTC	ATTT	synonymous_variant	LOW	MPN035	p.5	gene
1416	p2_2_S1	2	41441	0	57	56	1	1.78571	G	A	missense_variant	MODERATE	MPN035	p.Ala12Thr	gene
1417	p2_2_S1	2	41472	0	57	55	2	3.63636	G	A	missense_variant	MODERATE	MPN035	p.Gly22Asp	gene
1418	p2_2_S1	2	41514	1.81565e-15	71	70	1	1.42857	TAA	CAG	missense_variant	MODERATE	MPN035	p.LeuThr36SerAla	gene
1419	p2_2_S1	2	41556	2.93842e-15	63	62	1	1.6129	A	G	missense_variant	MODERATE	MPN035	p.Asp50Gly	gene
1420	p2_2_S1	2	41598	0	71	70	1	1.42857	A	T	missense_variant	MODERATE	MPN035	p.Gln64Leu	gene
1421	p2_2_S1	2	41602	0	87	86	1	1.16279	T	C	synonymous_variant	LOW	MPN035	p.Ser65Ser	gene
1422	p2_2_S1	2	41631	5.05236e-16	73	72	1	1.38889	T	C	missense_variant	MODERATE	MPN035	p.Leu75Pro	gene
1423	p2_2_S1	2	41658	4.97467e-16	73	72	1	1.38889	A	G	missense_variant	MODERATE	MPN035	p.Lys84Arg	gene
1424	p2_2_S1	2	41675	6.32863e-15	71	69	2	2.89855	ACCTTAAA	GCCCTAAA	missense_variant	MODERATE	MPN035	p.Thr90Ala	gene
1425	p2_2_S1	2	41700	0	77	76	1	1.31579	A	G	missense_variant	MODERATE	MPN035	p.Asn98Ser	gene
1426	p2_2_S1	2	41714	0	81	80	1	1.25	T	C	missense_variant	MODERATE	MPN035	p.Trp103Arg	gene
1427	p2_2_S1	2	41736	3.75984e-15	83	82	1	1.21951	A	T	missense_variant	MODERATE	MPN035	p.Tyr110Phe	gene
1428	p2_2_S1	2	41769	0	79	78	1	1.28205	TTAA	CTAT	missense_variant	MODERATE	MPN035	p.IleLys121ThrIle	gene
1429	p2_2_S1	2	41805	1.73278e-16	66	65	1	1.53846	AAA	TAG	missense_variant	MODERATE	MPN035	p.GluThr133ValAla	gene
1430	p2_2_S1	2	41951	0	48	47	1	2.12766	T	C	missense_variant	MODERATE	MPN035	p.Phe182Leu	gene
1431	p2_2_S1	2	42010	3.29981e-15	55	53	2	3.77358	C	T	synonymous_variant	LOW	MPN035	p.Asp201Asp	gene
1432	p2_2_S1	2	42061	7.01115e-16	42	41	1	2.43902	A	G	synonymous_variant	LOW	MPN035	p.Gln218Gln	gene
1433	p2_2_S1	2	42086	0	43	42	1	2.38095	G	C	missense_variant	MODERATE	MPN035	p.Asp227His	gene
1434	p2_2_S1	2	42168	1.63884e-15	62	61	1	1.63934	TTA	CTT	missense_variant	MODERATE	MPN035	p.LeuAsn254ProTyr	gene
1435	p2_2_S1	2	42171	0	62	61	1	1.63934	A	G	missense_variant	MODERATE	MPN035	p.Asn255Ser	gene
1436	p2_2_S1	2	42195	2.04566e-15	65	64	1	1.5625	A	G	missense_variant	MODERATE	MPN035	p.Lys263Arg	gene
1437	p2_2_S1	2	42212	1.91359e-15	83	82	1	1.21951	TAT	AAA	missense_variant	MODERATE	MPN035	p.Tyr269Lys	gene
1438	p2_2_S1	2	42271	0	63	62	1	1.6129	CTTAC	TTTAT	stop_gained	HIGH	MPN035	p.Gln290*	gene
1439	p2_2_S1	2	42333	4.7842e-15	69	67	2	2.98507	T	A	missense_variant	MODERATE	MPN035	p.Phe309Tyr	gene
1440	p2_2_S1	2	42353	1.81047e-16	91	90	1	1.11111	C	A	missense_variant	MODERATE	MPN035	p.Pro316Thr	gene
1441	p2_2_S1	2	42354	0	83	82	1	1.21951	CGT	TGA	missense_variant	MODERATE	MPN035	p.ProLeu316LeuMet	gene
1442	p2_2_S1	2	42423	0	77	76	1	1.31579	A	G	missense_variant	MODERATE	MPN035	p.Asn339Ser	gene
1443	p2_2_S1	2	42439	0	86	85	1	1.17647	A	G	synonymous_variant	LOW	MPN035	p.Leu344Leu	gene
1444	p2_2_S1	2	42461	0	77	76	1	1.31579	GAATT	AAATA	stop_gained	HIGH	MPN035	p.GluLeu352*	gene
1445	p2_2_S1	2	42473	2.5542e-15	78	77	1	1.2987	AAA	TAT	missense_variant	MODERATE	MPN035	p.Lys356Tyr	gene
1446	p2_2_S1	2	42507	4.55819e-15	78	76	2	2.63158	GGGA	AGGT	missense_variant	MODERATE	MPN035	p.ArgGlu367GlnVal	gene
1447	p2_2_S1	2	42524	0	80	79	1	1.26582	GGCTT	AGCTA	stop_gained	HIGH	MPN035	p.GlyLeu373*	gene
1448	p2_2_S1	2	42536	0	74	73	1	1.36986	ATT	GTC	missense_variant	MODERATE	MPN035	p.Ile377Val	gene
1449	p2_2_S1	2	42545	2.20764e-15	66	64	2	3.125	TTTGTCAA	CTTATCTG	missense_variant	MODERATE	MPN035	p.PheValLys380LeuIleTrp	gene
1450	p2_2_S1	2	42578	0	67	66	1	1.51515	T	C	synonymous_variant	LOW	MPN035	p.Leu391Leu	gene
1451	p2_2_S1	2	42606	6.55441e-15	65	63	2	3.1746	T	C	missense_variant	MODERATE	MPN035	p.Ile400Thr	gene
1452	p2_2_S1	2	42608	1.14938e-15	67	66	1	1.51515	A	T	missense_variant	MODERATE	MPN035	p.Thr401Ser	gene
1453	p2_2_S1	2	42695	2.44142e-15	54	53	1	1.88679	AAGA	TTGT	missense_variant	MODERATE	MPN035	p.LysAsn430LeuTyr	gene
1454	p2_2_S1	2	42750	0	70	68	2	2.94118	A	G	missense_variant	MODERATE	MPN035	p.Asp448Gly	gene
1455	p2_2_S1	2	42789	3.90275e-15	74	73	1	1.36986	T	A	missense_variant	MODERATE	MPN035	p.Val461Glu	gene
1456	p2_2_S1	2	42827	0	63	62	1	1.6129	T	C	missense_variant	MODERATE	MPN035	p.Tyr474His	gene
1457	p2_2_S1	2	42910	0	64	63	1	1.5873	AAA	GAG	missense_variant	MODERATE	MPN035	p.Asn502Ser	gene
1458	p2_2_S1	2	43005	1.16421e-15	67	66	1	1.51515	G	A	missense_variant	MODERATE	MPN035	p.Gly533Asp	gene
1459	p2_2_S1	2	43021	4.97467e-16	73	72	1	1.38889	T	A	missense_variant	MODERATE	MPN035	p.Asp538Glu	gene
1460	p2_2_S1	2	43052	7.30756e-15	75	74	1	1.35135	T	C	missense_variant	MODERATE	MPN035	p.Phe549Leu	gene
1461	p2_2_S1	2	43063	3.91758e-16	76	75	1	1.33333	GGGT	AGGA	synonymous_variant	LOW	MPN035	p.554	gene
1462	p2_2_S1	2	43087	0	72	71	1	1.40845	A	T	missense_variant	MODERATE	MPN035	p.Trp560Cys	gene
1463	p2_2_S1	2	43094	0	76	74	2	2.7027	G	A	missense_variant	MODERATE	MPN035	p.Ala563Thr	gene
1464	p2_2_S1	2	43122	0	71	69	2	2.89855	GAAAAGGC	GAAAGGC	frameshift_variant	HIGH	MPN035	p.Gly574fs	gene
1465	p2_2_S1	2	43132	0	72	71	1	1.40845	A	G	synonymous_variant	LOW	MPN035	p.Lys575Lys	gene
1466	p2_2_S1	2	43147	0	78	77	1	1.2987	TCTGTTT	ACTGATA	missense_variant	MODERATE	MPN035	p.HisLeuPhe580GlnLeuIle	gene
1467	p2_2_S1	2	43170	2.66038e-17	67	66	1	1.51515	TGTGGGAAT	AGTGAGAAC	missense_variant	MODERATE	MPN035	p.Val588Glu	gene
1468	p2_2_S1	2	43187	0	73	72	1	1.38889	G	C	missense_variant	MODERATE	MPN035	p.Val594Leu	gene
1469	p2_2_S1	2	43195	6.29544e-16	73	72	1	1.38889	CCATT	TCATC	synonymous_variant	LOW	MPN035	p.599	gene
1470	p2_2_S1	2	43203	0	84	82	2	2.43902	C	T	missense_variant	MODERATE	MPN035	p.Pro599Leu	gene
1471	p2_2_S1	2	43225	0	71	70	1	1.42857	G	C	missense_variant	MODERATE	MPN035	p.Gln606His	gene
1472	p2_2_S1	2	43253	2.63707e-15	81	80	1	1.25	A	T	missense_variant	MODERATE	MPN035	p.Ile616Phe	gene
1473	p2_2_S1	2	43284	1.24543e-16	78	77	1	1.2987	A	T	missense_variant	MODERATE	MPN035	p.Lys626Ile	gene
1474	p2_2_S1	2	43289	0	92	90	2	2.22222	ATAAA	TTGAA	missense_variant	MODERATE	MPN035	p.Ile628Leu	gene
1475	p2_2_S1	2	43295	0	89	88	1	1.13636	G	C	missense_variant	MODERATE	MPN035	p.Asp630His	gene
1476	p2_2_S1	2	43307	3.46579e-15	84	81	3	3.7037	ACCCAAA	GCTCAAA	missense_variant	MODERATE	MPN035	p.Thr634Ala	gene
1477	p2_2_S1	2	43345	0	84	82	2	2.43902	A	T	missense_variant	MODERATE	MPN035	p.Glu646Asp	gene
1478	p2_2_S1	2	43358	0	91	90	1	1.11111	ATTG	GTTA	missense_variant	MODERATE	MPN035	p.IleAsp651ValAsn	gene
1479	p2_2_S1	2	43374	0	86	85	1	1.17647	A	T	missense_variant	MODERATE	MPN035	p.Tyr656Phe	gene
1480	p2_2_S1	2	43414	7.3231e-15	75	74	1	1.35135	T	A	upstream_gene_variant	MODIFIER	MPN034	c.-2284A>T	intergenic
1481	p2_2_S1	2	43443	0	59	58	1	1.72414	A	G	upstream_gene_variant	MODIFIER	MPN034	c.-2313T>C	intergenic
1482	p2_2_S1	2	43465	0	68	67	1	1.49254	TCCTA	CCCTG	upstream_gene_variant	MODIFIER	MPN034	c.-2339_-2335delTAGGAinsCAGGG	intergenic
1483	p2_2_S1	2	43566	1.00977e-15	76	75	1	1.33333	T	C	upstream_gene_variant	MODIFIER	MPN034	c.-2436A>G	intergenic
1484	p2_2_S1	2	43618	0	79	78	1	1.28205	ACC	TCT	missense_variant	MODERATE	MPN036	p.LeuPro13PheLeu	gene
1485	p2_2_S1	2	43633	0	83	82	1	1.21951	TCCGT	CCCGC	synonymous_variant	LOW	MPN036	p.21	gene
1486	p2_2_S1	2	43640	3.52982e-15	79	78	1	1.28205	T	A	missense_variant	MODERATE	MPN036	p.Phe21Ile	gene
1487	p2_2_S1	2	43646	0	86	85	1	1.17647	C	T	synonymous_variant	LOW	MPN036	p.Leu23Leu	gene
1488	p2_2_S1	2	43648	3.75207e-15	83	82	1	1.21951	A	G	synonymous_variant	LOW	MPN036	p.Leu23Leu	gene
1489	p2_2_S1	2	43659	1.89876e-15	74	73	1	1.36986	A	T	missense_variant	MODERATE	MPN036	p.Lys27Ile	gene
1490	p2_2_S1	2	43677	2.38869e-15	69	68	1	1.47059	CAGTTG	TTGTTA	missense_variant	MODERATE	MPN036	p.ProValAla33LeuValThr	gene
1491	p2_2_S1	2	43729	0	63	61	2	3.27869	C	T	synonymous_variant	LOW	MPN036	p.Phe50Phe	gene
1492	p2_2_S1	2	43731	1.95102e-15	62	61	1	1.63934	GCG	ACA	missense_variant	MODERATE	MPN036	p.ArgAla51HisThr	gene
1493	p2_2_S1	2	43742	0	61	60	1	1.66667	GTGG	CTGA	missense_variant	MODERATE	MPN036	p.ValGly55LeuSer	gene
1494	p2_2_S1	2	43812	0	72	70	2	2.85714	T	A	missense_variant	MODERATE	MPN036	p.Phe78Tyr	gene
1495	p2_2_S1	2	43859	0	71	70	1	1.42857	C	A	missense_variant	MODERATE	MPN036	p.Pro94Thr	gene
1496	p2_2_S1	2	43990	0	58	57	1	1.75439	C	A	missense_variant	MODERATE	MPN036	p.Asp137Glu	gene
1497	p2_2_S1	2	44045	0	67	66	1	1.51515	T	C	missense_variant	MODERATE	MPN036	p.Phe156Leu	gene
1498	p2_2_S1	2	44138	1.24543e-16	78	77	1	1.2987	G	A	missense_variant	MODERATE	MPN036	p.Asp187Asn	gene
1499	p2_2_S1	2	44151	7.72451e-16	82	81	1	1.23457	ACA	TCT	missense_variant	MODERATE	MPN036	p.AspIle191ValPhe	gene
1500	p2_2_S1	2	44154	0	81	80	1	1.25	TTG	CTA	missense_variant	MODERATE	MPN036	p.IleAla192ThrThr	gene
1501	p2_2_S1	2	44255	0	60	59	1	1.69492	TACTTT	AACTAC	missense_variant	MODERATE	MPN036	p.TyrPhe226AsnTyr	gene
1502	p2_2_S1	2	44277	7.45871e-15	66	65	1	1.53846	T	A	missense_variant	MODERATE	MPN036	p.Leu233Gln	gene
1503	p2_2_S1	2	44279	7.53852e-16	64	63	1	1.5873	CGGAC	TGGAT	missense_variant	MODERATE	MPN036	p.ArgThr234TrpIle	gene
1504	p2_2_S1	2	44289	0	59	58	1	1.72414	A	G	missense_variant	MODERATE	MPN036	p.Asn237Ser	gene
1505	p2_2_S1	2	44310	2.63707e-15	62	59	3	5.08475	TTA	ATT	missense_variant	MODERATE	MPN036	p.PheAsn244TyrTyr	gene
1506	p2_2_S1	2	44349	0	81	80	1	1.25	A	T	missense_variant	MODERATE	MPN036	p.Asn257Ile	gene
1507	p2_2_S1	2	44374	0	77	76	1	1.31579	A	G	synonymous_variant	LOW	MPN036	p.Lys265Lys	gene
1508	p2_2_S1	2	44385	3.75984e-15	83	82	1	1.21951	TGA	TA	frameshift_variant	HIGH	MPN036	p.Asn270fs	gene
1509	p2_2_S1	2	44402	3.38292e-15	88	87	1	1.14943	G	C	missense_variant	MODERATE	MPN036	p.Asp275His	gene
1510	p2_2_S1	2	44433	7.09685e-15	81	79	2	2.53165	AAGA	TGGT	missense_variant	MODERATE	MPN036	p.GlnAsp285LeuVal	gene
1511	p2_2_S1	2	44438	2.12453e-15	78	77	1	1.2987	C	T	stop_gained	HIGH	MPN036	p.Gln287*	gene
1512	p2_2_S1	2	44451	2.53936e-15	60	59	1	1.69492	TA	CT	missense_variant	MODERATE	MPN036	p.Leu291Ser	gene
1513	p2_2_S1	2	44454	0	57	56	1	1.78571	ACTTA	TCTTT	missense_variant	MODERATE	MPN036	p.AsnLeu292IlePhe	gene
1514	p2_2_S1	2	44459	0	53	52	1	1.92308	A	G	missense_variant	MODERATE	MPN036	p.Asn294Asp	gene
1515	p2_2_S1	2	44486	0	57	56	1	1.78571	CCATT	TCATC	missense_variant	MODERATE	MPN036	p.ProLeu303SerSer	gene
1516	p2_2_S1	2	44494	6.78514e-16	59	56	3	5.35714	CGAAA	TCTAT	missense_variant	MODERATE	MPN036	p.GluMet306LeuLeu	gene
1517	p2_2_S1	2	44515	5.4267e-16	60	59	1	1.69492	GCA	ACT	missense_variant	MODERATE	MPN036	p.Gln313Leu	gene
1518	p2_2_S1	2	44522	1.95102e-15	62	61	1	1.63934	TAT	AAC	missense_variant	MODERATE	MPN036	p.Tyr315Asn	gene
1519	p2_2_S1	2	44589	5.96725e-15	52	51	1	1.96078	T	C	missense_variant	MODERATE	MPN036	p.Ile337Thr	gene
1520	p2_2_S1	2	44590	5.07049e-15	51	49	2	4.08163	T	C	synonymous_variant	LOW	MPN036	p.Ile337Ile	gene
1521	p2_2_S1	2	44618	4.14595e-16	60	59	1	1.69492	G	A	missense_variant	MODERATE	MPN036	p.Glu347Lys	gene
1522	p2_2_S1	2	44630	4.14595e-16	60	59	1	1.69492	A	G	missense_variant	MODERATE	MPN036	p.Ile351Val	gene
1523	p2_2_S1	2	44631	0	63	62	1	1.6129	TTC	CTG	missense_variant	MODERATE	MPN036	p.IleGln351ThrGlu	gene
1524	p2_2_S1	2	44649	0	61	60	1	1.66667	AAAA	TAAT	missense_variant	MODERATE	MPN036	p.GluLys357ValMet	gene
1525	p2_2_S1	2	44705	0	76	75	1	1.33333	C	T	synonymous_variant	LOW	MPN036	p.Leu376Leu	gene
1526	p2_2_S1	2	44718	1.89876e-15	74	73	1	1.36986	A	G	missense_variant	MODERATE	MPN036	p.Glu380Gly	gene
1527	p2_2_S1	2	44731	2.71264e-15	69	68	1	1.47059	ATT	GTA	missense_variant	MODERATE	MPN036	p.Phe385Tyr	gene
1528	p2_2_S1	2	44749	3.59386e-15	67	66	1	1.51515	AGACC	TGACT	missense_variant	MODERATE	MPN036	p.GluAspArg390AspAspCys	gene
1529	p2_2_S1	2	44770	1.69534e-15	70	69	1	1.44928	CA	TT	missense_variant	MODERATE	MPN036	p.Thr398Ser	gene
1530	p2_2_S1	2	44773	2.26038e-15	69	68	1	1.47059	G	A	synonymous_variant	LOW	MPN036	p.Thr398Thr	gene
1531	p2_2_S1	2	44784	0	67	66	1	1.51515	A	G	missense_variant	MODERATE	MPN036	p.Asn402Ser	gene
1532	p2_2_S1	2	44788	0	84	83	1	1.20482	T	C	synonymous_variant	LOW	MPN036	p.Leu403Leu	gene
1533	p2_2_S1	2	44789	0	73	72	1	1.38889	TATACCCG	AATTCCTA	missense_variant	MODERATE	MPN036	p.TyrThrArg404AsnSerTyr	gene
1534	p2_2_S1	2	44805	3.54489e-15	79	78	1	1.28205	T	A	stop_gained	HIGH	MPN036	p.Leu409*	gene
1535	p2_2_S1	2	44807	0	79	78	1	1.28205	GTGA	TTGT	stop_gained	HIGH	MPN036	p.ValLys410*	gene
1536	p2_2_S1	2	44844	0	73	72	1	1.38889	CTTGAA	TTTAAT	stop_gained	HIGH	MPN036	p.AlaTrpThr422*	gene
1537	p2_2_S1	2	44858	0	68	67	1	1.49254	A	T	missense_variant	MODERATE	MPN036	p.Ile427Phe	gene
1538	p2_2_S1	2	44864	0	52	51	1	1.96078	TTGCTTGGTT	ATGCAAGGTA	missense_variant	MODERATE	MPN036	p.LeuLeuGlyTrp429MetGlnGlyArg	gene
1539	p2_2_S1	2	44878	0	57	56	1	1.78571	AGCA	TGCT	missense_variant	MODERATE	MPN036	p.Lys433Asn	gene
1540	p2_2_S1	2	44894	7.60962e-15	57	56	1	1.78571	T	C	synonymous_variant	LOW	MPN036	p.Leu439Leu	gene
1541	p2_2_S1	2	44920	0	73	71	2	2.8169	CCTATT	GCTAAC	missense_variant	MODERATE	MPN036	p.AsnLeuLeu447LysLeuThr	gene
1542	p2_2_S1	2	44939	5.07802e-15	51	49	2	4.08163	T	C	missense_variant	MODERATE	MPN036	p.Phe454Leu	gene
1543	p2_2_S1	2	44960	0	61	60	1	1.66667	AAAAA	TAAAT	stop_gained	HIGH	MPN036	p.LysAsn461*	gene
1544	p2_2_S1	2	44974	5.61245e-15	57	56	1	1.78571	G	C	synonymous_variant	LOW	MPN036	p.Ser465Ser	gene
1545	p2_2_S1	2	44988	0	61	60	1	1.66667	GTAAA	CTAAG	missense_variant	MODERATE	MPN036	p.Gly470Ala	gene
1546	p2_2_S1	2	45016	0	77	76	1	1.31579	C	A	stop_gained	HIGH	MPN036	p.Tyr479*	gene
1547	p2_2_S1	2	45036	2.98009e-15	85	84	1	1.19048	ACTGACTCC	TCTGTCTCT	missense_variant	MODERATE	MPN036	p.AsnTrpLeuArg486IleCysLeuCys	gene
1548	p2_2_S1	2	45049	0	91	89	2	2.24719	G	C	missense_variant	MODERATE	MPN036	p.Trp490Cys	gene
1549	p2_2_S1	2	45118	0	72	70	2	2.85714	T	C	synonymous_variant	LOW	MPN036	p.Asn513Asn	gene
1550	p2_2_S1	2	45168	0	77	76	1	1.31579	G	A	missense_variant	MODERATE	MPN036	p.Gly530Asp	gene
1551	p2_2_S1	2	45169	0	72	71	1	1.40845	T	A	synonymous_variant	LOW	MPN036	p.Gly530Gly	gene
1552	p2_2_S1	2	45178	0	72	71	1	1.40845	T	A	synonymous_variant	LOW	MPN036	p.Ile533Ile	gene
1553	p2_2_S1	2	45229	6.06519e-15	89	86	3	3.48837	TAGTT	TGGTA	missense_variant	MODERATE	MPN036	p.SerPhe551GlyIle	gene
1554	p2_2_S1	2	45241	0	93	92	1	1.08696	A	G	synonymous_variant	LOW	MPN036	p.Leu554Leu	gene
1555	p2_2_S1	2	45265	0	100	99	1	1.0101	GTG	ATA	stop_gained	HIGH	MPN036	p.Trp563*	gene
1556	p2_2_S1	2	45273	0	98	97	1	1.03093	T	C	missense_variant	MODERATE	MPN036	p.Leu565Ser	gene
1557	p2_2_S1	2	45305	5.93688e-15	95	93	2	2.15054	AAGGGTA	TTGGATT	stop_gained	HIGH	MPN036	p.LysGlyLys576*	gene
1558	p2_2_S1	2	45379	0	66	64	2	3.125	C	G	missense_variant	MODERATE	MPN036	p.His600Gln	gene
1559	p2_2_S1	2	45402	0	63	62	1	1.6129	AAG	TAC	missense_variant	MODERATE	MPN036	p.GluAsp608ValHis	gene
1560	p2_2_S1	2	45416	0	68	67	1	1.49254	T	C	synonymous_variant	LOW	MPN036	p.Leu613Leu	gene
1561	p2_2_S1	2	45440	0	66	64	2	3.125	A	G	missense_variant	MODERATE	MPN036	p.Lys621Glu	gene
1562	p2_2_S1	2	45477	0	62	61	1	1.63934	ACG	TCA	missense_variant	MODERATE	MPN036	p.AsnGly633IleSer	gene
1563	p2_2_S1	2	45522	1.22848e-15	77	75	2	2.66667	C	T	missense_variant	MODERATE	MPN036	p.Ser648Phe	gene
1564	p2_2_S1	2	45523	4.92735e-15	76	74	2	2.7027	TTAT	CTAC	synonymous_variant	LOW	MPN036	p.650	gene
1565	p2_2_S1	2	45531	7.10438e-15	71	70	1	1.42857	T	A	missense_variant	MODERATE	MPN036	p.Val651Asp	gene
1566	p2_2_S1	2	45580	0	67	66	1	1.51515	A	T	missense_variant	MODERATE	MPN036	p.Lys667Asn	gene
1567	p2_2_S1	2	45600	1.15668e-15	67	66	1	1.51515	A	G	upstream_gene_variant	MODIFIER	MPN034	c.-4470T>C	intergenic
1568	p2_2_S1	2	45605	0	73	72	1	1.38889	TTTGC	ATTGG	upstream_gene_variant	MODIFIER	MPN034	c.-4479_-4475delGCAAAinsCCAAT	intergenic
1569	p2_2_S1	2	45610	0	75	74	1	1.35135	TG	AA	upstream_gene_variant	MODIFIER	MPN034	c.-4481_-4480delCAinsTT	intergenic
1570	p2_2_S1	2	45650	4.06826e-16	57	56	1	1.78571	AAAAA	TAAAT	upstream_gene_variant	MODIFIER	MPN034	c.-4524_-4520delTTTTTinsATTTA	intergenic
1571	p2_2_S1	2	45662	0	64	63	1	1.5873	A	T	upstream_gene_variant	MODIFIER	MPN034	c.-4532T>A	intergenic
1572	p2_2_S1	2	45667	2.33925e-15	56	55	1	1.81818	GAATAAA	CAGTATT	upstream_gene_variant	MODIFIER	MPN034	c.-4543_-4537delTTTATTCinsAATACTG	intergenic
1573	p2_2_S1	2	45775	0	53	51	2	3.92157	T	C	missense_variant	MODERATE	MPN037	p.Ser3Pro	gene
1574	p2_2_S1	2	45815	3.22471e-15	45	44	1	2.27273	T	C	missense_variant	MODERATE	MPN037	p.Phe16Ser	gene
1575	p2_2_S1	2	45905	0	53	52	1	1.92308	T	C	missense_variant	MODERATE	MPN037	p.Ile46Thr	gene
1576	p2_2_S1	2	45933	7.08202e-15	68	67	1	1.49254	TTCAA	GTCAT	missense_variant	MODERATE	MPN037	p.Ile57Phe	gene
1577	p2_2_S1	2	45975	7.45094e-15	66	65	1	1.53846	G	A	synonymous_variant	LOW	MPN037	p.Ser69Ser	gene
1578	p2_2_S1	2	45978	2.0492e-15	65	64	1	1.5625	A	T	missense_variant	MODERATE	MPN037	p.Leu70Phe	gene
1579	p2_2_S1	2	46012	7.59455e-15	57	56	1	1.78571	G	C	missense_variant	MODERATE	MPN037	p.Gly82Arg	gene
1580	p2_2_S1	2	46050	5.07049e-15	51	49	2	4.08163	A	G	synonymous_variant	LOW	MPN037	p.Lys94Lys	gene
1581	p2_2_S1	2	46089	0	49	48	1	2.08333	A	G	missense_variant	MODERATE	MPN037	p.Ile107Met	gene
1582	p2_2_S1	2	46110	0	52	50	2	4	ACCCTTTTGGTC	GCCCTTTTTGGTC	frameshift_variant&synonymous_variant	HIGH	MPN037	p.Phe116fs	gene
1583	p2_2_S1	2	46133	6.8407e-15	47	45	2	4.44444	G	T	missense_variant	MODERATE	MPN037	p.Cys122Phe	gene
1584	p2_2_S1	2	46139	1.06377e-14	51	47	4	8.51064	A	G	missense_variant	MODERATE	MPN037	p.Glu124Gly	gene
1585	p2_2_S1	2	46190	0	61	59	2	3.38983	C	T	missense_variant	MODERATE	MPN037	p.Ser141Phe	gene
1586	p2_2_S1	2	46286	0	57	56	1	1.78571	C	A	upstream_gene_variant	MODIFIER	MPN042	c.-3005C>A	intergenic
1587	p2_2_S1	2	46370	0	53	51	2	3.92157	T	C	upstream_gene_variant	MODIFIER	MPN042	c.-2921T>C	intergenic
1588	p2_2_S1	2	46371	5.57502e-16	51	50	1	2	T	C	upstream_gene_variant	MODIFIER	MPN042	c.-2920T>C	intergenic
1589	p2_2_S1	2	46418	0	39	38	1	2.63158	GGTACTT	AGAACTC	upstream_gene_variant	MODIFIER	MPN042	c.-2873_-2867delGGTACTTinsAGAACTC	intergenic
1590	p2_2_S1	2	46427	3.59763e-15	40	39	1	2.5641	A	G	upstream_gene_variant	MODIFIER	MPN042	c.-2864A>G	intergenic
1591	p2_2_S1	2	46457	2.20764e-15	46	44	2	4.54545	TTGT	ATGA	missense_variant	MODERATE	MPN038	p.AspLys111ValIle	gene
1592	p2_2_S1	2	46474	0	50	49	1	2.04082	TAT	AAA	missense_variant	MODERATE	MPN038	p.Ile106Phe	gene
1593	p2_2_S1	2	46498	0	55	54	1	1.85185	TAA	CAG	synonymous_variant	LOW	MPN038	p.99	gene
1594	p2_2_S1	2	46517	1.44696e-15	49	48	1	2.08333	T	A	missense_variant	MODERATE	MPN038	p.Gln92Leu	gene
1595	p2_2_S1	2	46524	3.22471e-15	45	44	1	2.27273	T	A	stop_gained	HIGH	MPN038	p.Lys90*	gene
1596	p2_2_S1	2	46563	0	46	45	1	2.22222	C	T	missense_variant	MODERATE	MPN038	p.Ala77Thr	gene
1597	p2_2_S1	2	46589	2.90052e-15	27	26	1	3.84615	TTTT	CTTA	missense_variant	MODERATE	MPN038	p.GluLys67ValArg	gene
1598	p2_2_S1	2	46608	0	28	27	1	3.7037	G	C	missense_variant	MODERATE	MPN038	p.Leu62Val	gene
1599	p2_2_S1	2	46627	0	31	30	1	3.33333	TTCT	ATCA	missense_variant	MODERATE	MPN038	p.Glu55Asp	gene
1600	p2_2_S1	2	46633	1.21718e-15	28	27	1	3.7037	T	C	synonymous_variant	LOW	MPN038	p.Lys53Lys	gene
1601	p2_2_S1	2	46710	0	45	44	1	2.27273	TGTC	AGTT	missense_variant	MODERATE	MPN038	p.AspMet27AsnLeu	gene
1602	p2_2_S1	2	46721	0	48	46	2	4.34783	C	T	missense_variant	MODERATE	MPN038	p.Gly24Asp	gene
1603	p2_2_S1	2	46756	0	52	51	1	1.96078	A	T	missense_variant	MODERATE	MPN038	p.Asn12Lys	gene
1604	p2_2_S1	2	46760	3.13053e-15	42	41	1	2.43902	ATCTT	GTCTA	stop_gained	HIGH	MPN038	p.LysIle10*	gene
1605	p2_2_S1	2	46768	0	41	40	1	2.5	TTTATT	ATAATA	missense_variant	MODERATE	MPN038	p.AsnLys7TyrTyr	gene
1606	p2_2_S1	2	46782	3.72194e-15	40	39	1	2.5641	TCTT	ACTA	stop_gained	HIGH	MPN038	p.LysLys3*	gene
1607	p2_2_S1	2	46787	0	39	38	1	2.63158	AACA	TACT	start_lost	HIGH	MPN038	p.LeuPhe1?	gene
1608	p2_2_S1	2	46806	0	35	34	1	2.94118	T	A	upstream_gene_variant	MODIFIER	MPN038	c.-15A>T	intergenic
1609	p2_2_S1	2	46816	0	41	40	1	2.5	GGCAAAGACC	AGCATACACT	upstream_gene_variant	MODIFIER	MPN038	c.-34_-25delGGTCTTTGCCinsAGTGTATGCT	intergenic
1610	p2_2_S1	2	46888	0	60	58	2	3.44828	T	C	upstream_gene_variant	MODIFIER	MPN038	c.-97A>G	intergenic
1611	p2_2_S1	2	46902	0	60	59	1	1.69492	GCC	ACT	upstream_gene_variant	MODIFIER	MPN038	c.-113_-111delGGCinsAGT	intergenic
1612	p2_2_S1	2	46960	1.30335e-15	58	57	1	1.75439	A	G	upstream_gene_variant	MODIFIER	MPN038	c.-169T>C	intergenic
1613	p2_2_S1	2	46968	0	62	60	2	3.33333	A	G	upstream_gene_variant	MODIFIER	MPN038	c.-177T>C	intergenic
1614	p2_2_S1	2	47022	9.1936e-16	46	45	1	2.22222	T	G	upstream_gene_variant	MODIFIER	MPN038	c.-231A>C	intergenic
1615	p2_2_S1	2	47037	0	53	52	1	1.92308	A	T	upstream_gene_variant	MODIFIER	MPN038	c.-246T>A	intergenic
1616	p2_2_S1	2	47041	0	50	49	1	2.04082	C	T	upstream_gene_variant	MODIFIER	MPN038	c.-250G>A	intergenic
1617	p2_2_S1	2	47068	0	39	38	1	2.63158	A	G	upstream_gene_variant	MODIFIER	MPN038	c.-277T>C	intergenic
1618	p2_2_S1	2	47147	0	35	34	1	2.94118	AACA	TACT	upstream_gene_variant	MODIFIER	MPN038	c.-359_-356delTGTTinsAGTA	intergenic
1619	p2_2_S1	2	47167	0	39	38	1	2.63158	T	C	upstream_gene_variant	MODIFIER	MPN038	c.-376A>G	intergenic
1620	p2_2_S1	2	47178	2.26014e-17	45	43	2	4.65116	G	A	upstream_gene_variant	MODIFIER	MPN038	c.-387C>T	intergenic
1621	p2_2_S1	2	47205	0	54	52	2	3.84615	C	A	upstream_gene_variant	MODIFIER	MPN038	c.-414G>T	intergenic
1622	p2_2_S1	2	47216	1.41659e-15	65	64	1	1.5625	ACTGG	TCTGT	upstream_gene_variant	MODIFIER	MPN038	c.-429_-425delCCAGTinsACAGA	intergenic
1623	p2_2_S1	2	47246	0	73	72	1	1.38889	ACCGTTT	GCTGTTA	upstream_gene_variant	MODIFIER	MPN038	c.-461_-455delAAACGGTinsTAACAGC	intergenic
1624	p2_2_S1	2	47257	6.41904e-15	74	72	2	2.77778	G	C	upstream_gene_variant	MODIFIER	MPN038	c.-466C>G	intergenic
1625	p2_2_S1	2	47349	3.53359e-15	74	73	1	1.36986	CAAA	TTGT	upstream_gene_variant	MODIFIER	MPN038	c.-561_-558delTTTGinsACAA	intergenic
1626	p2_2_S1	2	47364	0	69	67	2	2.98507	GGTCAAAGTTT	CGTCTATGTTT	upstream_gene_variant	MODIFIER	MPN038	c.-579_-573delTTTGACCinsATAGACG	intergenic
1627	p2_2_S1	2	47382	5.46954e-15	66	65	1	1.53846	C	T	upstream_gene_variant	MODIFIER	MPN038	c.-591G>A	intergenic
1628	p2_2_S1	2	47383	2.92335e-15	72	71	1	1.40845	AAA	TAG	upstream_gene_variant	MODIFIER	MPN038	c.-594_-592delTTTinsCTA	intergenic
1629	p2_2_S1	2	47399	1.90605e-15	74	73	1	1.36986	A	T	upstream_gene_variant	MODIFIER	MPN038	c.-608T>A	intergenic
1630	p2_2_S1	2	47406	0	77	76	1	1.31579	A	T	upstream_gene_variant	MODIFIER	MPN038	c.-615T>A	intergenic
1631	p2_2_S1	2	47407	2.85555e-15	82	80	2	2.5	C	G	upstream_gene_variant	MODIFIER	MPN038	c.-616G>C	intergenic
1632	p2_2_S1	2	47442	6.41904e-15	74	72	2	2.77778	T	C	upstream_gene_variant	MODIFIER	MPN038	c.-651A>G	intergenic
1633	p2_2_S1	2	47443	3.78597e-15	77	76	1	1.31579	TTCC	ATCT	upstream_gene_variant	MODIFIER	MPN038	c.-655_-652delGGAAinsAGAT	intergenic
1634	p2_2_S1	2	47498	0	75	74	1	1.35135	T	C	upstream_gene_variant	MODIFIER	MPN038	c.-707A>G	intergenic
1635	p2_2_S1	2	47516	0	84	83	1	1.20482	AGA	GGG	upstream_gene_variant	MODIFIER	MPN038	c.-727_-725delTCTinsCCC	intergenic
1636	p2_2_S1	2	47523	0	78	76	2	2.63158	T	C	upstream_gene_variant	MODIFIER	MPN038	c.-732A>G	intergenic
1637	p2_2_S1	2	47547	0	100	98	2	2.04082	ATTAA	GTTAG	upstream_gene_variant	MODIFIER	MPN038	c.-760_-756delTTAATinsCTAAC	intergenic
1638	p2_2_S1	2	47563	0	90	89	1	1.1236	A	G	upstream_gene_variant	MODIFIER	MPN038	c.-772T>C	intergenic
1639	p2_2_S1	2	47586	1.05709e-16	78	77	1	1.2987	T	A	upstream_gene_variant	MODIFIER	MPN038	c.-795A>T	intergenic
1640	p2_2_S1	2	47625	0	84	83	1	1.20482	A	G	upstream_gene_variant	MODIFIER	MPN038	c.-834T>C	intergenic
1641	p2_2_S1	2	47631	0	89	88	1	1.13636	AACC	TACT	upstream_gene_variant	MODIFIER	MPN038	c.-843_-840delGGTTinsAGTA	intergenic
1642	p2_2_S1	2	47721	0	66	65	1	1.53846	ATCTT	CTCTC	upstream_gene_variant	MODIFIER	MPN038	c.-934_-930delAAGATinsGAGAG	intergenic
1643	p2_2_S1	2	47731	1.65979e-16	66	65	1	1.53846	ACT	CCC	upstream_gene_variant	MODIFIER	MPN038	c.-942_-940delAGTinsGGG	intergenic
1644	p2_2_S1	2	47790	1.507e-15	71	70	1	1.42857	GGCGAGC	AGTGAGT	upstream_gene_variant	MODIFIER	MPN038	c.-1005_-999delGCTCGCCinsACTCACT	intergenic
1645	p2_2_S1	2	47843	2.78774e-15	72	71	1	1.40845	A	G	upstream_gene_variant	MODIFIER	MPN038	c.-1052T>C	intergenic
1646	p2_2_S1	2	47874	1.34102e-15	65	63	2	3.1746	A	G	upstream_gene_variant	MODIFIER	MPN038	c.-1083T>C	intergenic
1647	p2_2_S1	2	47895	2.41129e-15	60	59	1	1.69492	A	T	upstream_gene_variant	MODIFIER	MPN038	c.-1104T>A	intergenic
1648	p2_2_S1	2	47936	0	53	51	2	3.92157	G	A	upstream_gene_variant	MODIFIER	MPN038	c.-1145C>T	intergenic
1649	p2_2_S1	2	47950	3.43565e-15	46	44	2	4.54545	T	C	upstream_gene_variant	MODIFIER	MPN038	c.-1159A>G	intergenic
1650	p2_2_S1	2	48004	3.08156e-15	54	53	1	1.88679	T	A	upstream_gene_variant	MODIFIER	MPN038	c.-1213A>T	intergenic
1651	p2_2_S1	2	48026	0	55	54	1	1.85185	A	G	upstream_gene_variant	MODIFIER	MPN038	c.-1235T>C	intergenic
1652	p2_2_S1	2	48042	5.8241e-15	61	60	1	1.66667	T	C	upstream_gene_variant	MODIFIER	MPN038	c.-1251A>G	intergenic
1653	p2_2_S1	2	48078	0	89	88	1	1.13636	TTAA	CTAT	upstream_gene_variant	MODIFIER	MPN038	c.-1290_-1287delTTAAinsATAG	intergenic
1654	p2_2_S1	2	48114	0	86	85	1	1.17647	A	G	upstream_gene_variant	MODIFIER	MPN038	c.-1323T>C	intergenic
1655	p2_2_S1	2	48122	0	75	74	1	1.35135	T	A	upstream_gene_variant	MODIFIER	MPN038	c.-1331A>T	intergenic
1656	p2_2_S1	2	48131	0	78	77	1	1.2987	AGAA	GGAT	upstream_gene_variant	MODIFIER	MPN038	c.-1343_-1340delTTCTinsATCC	intergenic
1657	p2_2_S1	2	48154	6.11015e-15	92	90	2	2.22222	C	A	upstream_gene_variant	MODIFIER	MPN038	c.-1363G>T	intergenic
1658	p2_2_S1	2	48177	0	87	86	1	1.16279	A	C	upstream_gene_variant	MODIFIER	MPN038	c.-1386T>G	intergenic
1659	p2_2_S1	2	48195	1.75538e-15	83	82	1	1.21951	T	G	upstream_gene_variant	MODIFIER	MPN038	c.-1404A>C	intergenic
1660	p2_2_S1	2	48197	0	81	80	1	1.25	G	A	upstream_gene_variant	MODIFIER	MPN038	c.-1406C>T	intergenic
1661	p2_2_S1	2	48199	0	88	87	1	1.14943	AAG	TAC	upstream_gene_variant	MODIFIER	MPN038	c.-1410_-1408delCTTinsGTA	intergenic
1662	p2_2_S1	2	48205	0	75	73	2	2.73973	A	G	upstream_gene_variant	MODIFIER	MPN038	c.-1414T>C	intergenic
1663	p2_2_S1	2	48217	0	65	64	1	1.5625	GGG	AGA	upstream_gene_variant	MODIFIER	MPN038	c.-1428_-1426delCCCinsTCT	intergenic
1664	p2_2_S1	2	48222	0	71	70	1	1.42857	G	A	upstream_gene_variant	MODIFIER	MPN038	c.-1431C>T	intergenic
1665	p2_2_S1	2	48243	0	56	55	1	1.81818	AAA	GAT	upstream_gene_variant	MODIFIER	MPN038	c.-1454_-1452delTTTinsATC	intergenic
1666	p2_2_S1	2	48248	8.81926e-16	55	54	1	1.85185	AATTG	TATTC	upstream_gene_variant	MODIFIER	MPN038	c.-1461_-1457delCAATTinsGAATA	intergenic
1667	p2_2_S1	2	48264	3.7443e-15	58	57	1	1.75439	AAGAA	GAGAG	upstream_gene_variant	MODIFIER	MPN038	c.-1477_-1473delTTCTTinsCTCTC	intergenic
1668	p2_2_S1	2	48274	1.89876e-15	74	73	1	1.36986	G	A	upstream_gene_variant	MODIFIER	MPN038	c.-1483C>T	intergenic
1669	p2_2_S1	2	48289	0	71	70	1	1.42857	A	T	upstream_gene_variant	MODIFIER	MPN038	c.-1498T>A	intergenic
1670	p2_2_S1	2	48307	0	67	65	2	3.07692	A	G	upstream_gene_variant	MODIFIER	MPN038	c.-1516T>C	intergenic
1671	p2_2_S1	2	48351	0	55	54	1	1.85185	TTTGT	CTTGC	upstream_gene_variant	MODIFIER	MPN038	c.-1564_-1560delACAAAinsGCAAG	intergenic
1672	p2_2_S1	2	48370	7.76453e-16	55	54	1	1.85185	C	T	upstream_gene_variant	MODIFIER	MPN038	c.-1579G>A	intergenic
1673	p2_2_S1	2	48390	0	58	57	1	1.75439	T	C	upstream_gene_variant	MODIFIER	MPN038	c.-1599A>G	intergenic
1674	p2_2_S1	2	48417	0	55	54	1	1.85185	AAAA	GTAG	upstream_gene_variant	MODIFIER	MPN038	c.-1629_-1626delTTTTinsCTAC	intergenic
1675	p2_2_S1	2	48434	0	82	81	1	1.23457	A	T	upstream_gene_variant	MODIFIER	MPN038	c.-1643T>A	intergenic
1676	p2_2_S1	2	48441	0	67	66	1	1.51515	G	A	upstream_gene_variant	MODIFIER	MPN038	c.-1650C>T	intergenic
1677	p2_2_S1	2	48445	4.77691e-15	69	67	2	2.98507	T	C	upstream_gene_variant	MODIFIER	MPN038	c.-1654A>G	intergenic
1678	p2_2_S1	2	48454	6.33311e-16	64	63	1	1.5873	CTTTTAG	CTTTAG	upstream_gene_variant	MODIFIER	MPN038	c.-1667delA	intergenic
1679	p2_2_S1	2	48470	0	69	68	1	1.47059	TGCTT	GGCTC	upstream_gene_variant	MODIFIER	MPN038	c.-1683_-1679delAAGCAinsGAGCC	intergenic
1680	p2_2_S1	2	48483	5.56019e-15	65	64	1	1.5625	TATCTAACT	CATCCAACC	upstream_gene_variant	MODIFIER	MPN038	c.-1700_-1692delAGTTAGATAinsGGTTGGATG	intergenic
1681	p2_2_S1	2	48504	7.24752e-15	62	61	1	1.63934	A	T	upstream_gene_variant	MODIFIER	MPN038	c.-1713T>A	intergenic
1682	p2_2_S1	2	48546	3.69627e-16	76	75	1	1.33333	GATA	CATT	upstream_gene_variant	MODIFIER	MPN038	c.-1758_-1755delTATCinsAATG	intergenic
1683	p2_2_S1	2	48554	1.20541e-16	78	77	1	1.2987	A	T	upstream_gene_variant	MODIFIER	MPN038	c.-1763T>A	intergenic
1684	p2_2_S1	2	48557	0	67	66	1	1.51515	T	C	upstream_gene_variant	MODIFIER	MPN038	c.-1766A>G	intergenic
1685	p2_2_S1	2	48561	0	64	63	1	1.5873	GCT	ACA	upstream_gene_variant	MODIFIER	MPN038	c.-1772_-1770delAGCinsTGT	intergenic
1686	p2_2_S1	2	48579	0	53	52	1	1.92308	TTCG	ATCA	upstream_gene_variant	MODIFIER	MPN038	c.-1791_-1788delCGAAinsTGAT	intergenic
1687	p2_2_S1	2	48633	0	69	68	1	1.47059	GGTT	AGTA	upstream_gene_variant	MODIFIER	MPN038	c.-1845_-1842delAACCinsTACT	intergenic
1688	p2_2_S1	2	48717	8.17889e-16	49	48	1	2.08333	AATA	TATT	upstream_gene_variant	MODIFIER	MPN038	c.-1929_-1926delTATTinsAATA	intergenic
1689	p2_2_S1	2	48744	3.72947e-15	58	57	1	1.75439	AAA	TAT	upstream_gene_variant	MODIFIER	MPN038	c.-1955_-1953delTTTinsATA	intergenic
1690	p2_2_S1	2	48752	3.82741e-15	61	60	1	1.66667	T	C	upstream_gene_variant	MODIFIER	MPN038	c.-1961A>G	intergenic
1691	p2_2_S1	2	48762	0	57	56	1	1.78571	A	T	upstream_gene_variant	MODIFIER	MPN038	c.-1971T>A	intergenic
1692	p2_2_S1	2	48785	3.33395e-15	52	51	1	1.96078	AAACA	TAACT	upstream_gene_variant	MODIFIER	MPN038	c.-1998_-1994delTGTTTinsAGTTA	intergenic
1693	p2_2_S1	2	48805	2.25261e-15	44	43	1	2.32558	GGGAATGGG	AGAAAAGGA	upstream_gene_variant	MODIFIER	MPN038	c.-2022_-2014delCCCATTCCCinsTCCTTTTCT	intergenic
1694	p2_2_S1	2	48856	1.36079e-16	48	47	1	2.12766	TTGAT	CTGAA	upstream_gene_variant	MODIFIER	MPN038	c.-2069_-2065delATCAAinsTTCAG	intergenic
1695	p2_2_S1	2	48962	1.66168e-15	53	52	1	1.92308	C	T	upstream_gene_variant	MODIFIER	MPN038	c.-2171G>A	intergenic
1696	p2_2_S1	2	48983	0	55	54	1	1.85185	TTCTTGAA	ATCATGAT	upstream_gene_variant	MODIFIER	MPN038	c.-2199_-2192delTTCAAGAAinsATCATGAT	intergenic
1697	p2_2_S1	2	49091	0	71	70	1	1.42857	A	G	upstream_gene_variant	MODIFIER	MPN038	c.-2300T>C	intergenic
1698	p2_2_S1	2	49094	0	83	82	1	1.21951	TAAAC	AAAAT	upstream_gene_variant	MODIFIER	MPN038	c.-2307_-2303delGTTTAinsATTTT	intergenic
1699	p2_2_S1	2	49140	2.0492e-15	65	64	1	1.5625	G	A	upstream_gene_variant	MODIFIER	MPN038	c.-2349C>T	intergenic
1700	p2_2_S1	2	49199	2.41129e-15	60	59	1	1.69492	A	G	upstream_gene_variant	MODIFIER	MPN038	c.-2408T>C	intergenic
1701	p2_2_S1	2	49295	0	67	65	2	3.07692	A	G	missense_variant	MODERATE	MPN042	p.Lys2Arg	gene
1702	p2_2_S1	2	49318	0	69	68	1	1.47059	GGT	AGA	missense_variant	MODERATE	MPN042	p.Gly10Arg	gene
1703	p2_2_S1	2	49341	0	43	42	1	2.38095	GGCGCC	AGTGTG	missense_variant	MODERATE	MPN042	p.AlaPro18ValCys	gene
1704	p2_2_S1	2	49349	4.33994e-15	47	46	1	2.17391	T	C	missense_variant	MODERATE	MPN042	p.Leu20Ser	gene
1705	p2_2_S1	2	49361	0	52	51	1	1.96078	TTA	ATT	missense_variant	MODERATE	MPN042	p.IleSer24AsnCys	gene
1706	p2_2_S1	2	49398	0	52	51	1	1.96078	G	C	missense_variant	MODERATE	MPN042	p.Lys36Asn	gene
1707	p2_2_S1	2	49449	2.10947e-16	56	55	1	1.81818	AG	TT	missense_variant	MODERATE	MPN042	p.LeuGly53PheTrp	gene
1708	p2_2_S1	2	49455	2.18127e-15	56	55	1	1.81818	A	T	missense_variant	MODERATE	MPN042	p.Glu55Asp	gene
1709	p2_2_S1	2	49471	0	50	49	1	2.04082	ATTAA	GTTAG	missense_variant	MODERATE	MPN042	p.IleLys61ValArg	gene
1710	p2_2_S1	2	49534	0	43	40	3	7.5	AATAAGGAAA	AGTTAGGAAA	stop_gained	HIGH	MPN042	p.AsnLys82*	gene
1711	p2_2_S1	2	49551	0	39	38	1	2.63158	T	A	synonymous_variant	LOW	MPN042	p.Val87Val	gene
1712	p2_2_S1	2	49564	9.1936e-16	46	45	1	2.22222	C	T	missense_variant	MODERATE	MPN042	p.Pro92Ser	gene
1713	p2_2_S1	2	49569	0	42	41	1	2.43902	TGA	CGT	missense_variant	MODERATE	MPN042	p.Asp94Val	gene
1714	p2_2_S1	2	49587	0	40	39	1	2.5641	AAG	TAC	missense_variant	MODERATE	MPN042	p.Ser100Thr	gene
1715	p2_2_S1	2	49645	5.54488e-15	44	43	1	2.32558	AA	GT	missense_variant	MODERATE	MPN042	p.Lys119Val	gene
1716	p2_2_S1	2	49657	0	43	42	1	2.38095	GCTAA	CCTAT	missense_variant	MODERATE	MPN042	p.AlaAsn123ProIle	gene
1717	p2_2_S1	2	49696	0	47	46	1	2.17391	GATTTACCCGAAG	CTTTTTCCTCTAC	missense_variant	MODERATE	MPN042	p.AspLeuProGluAsp136LeuPheProLeuHis	gene
1718	p2_2_S1	2	49881	0	58	57	1	1.75439	T	G	synonymous_variant	LOW	MPN042	p.Arg197Arg	gene
1719	p2_2_S1	2	49895	0	46	45	1	2.22222	A	G	missense_variant	MODERATE	MPN042	p.Asn202Ser	gene
1720	p2_2_S1	2	50053	1.43543e-15	58	57	1	1.75439	CCCGTTA	TCCATTT	missense_variant	MODERATE	MPN042	p.ProValAsn255SerIleTyr	gene
1721	p2_2_S1	2	50064	3.40175e-15	58	57	1	1.75439	ACAAT	TCAAC	missense_variant	MODERATE	MPN042	p.TrpGlnPhe258CysGlnLeu	gene
1722	p2_2_S1	2	50090	0	60	59	1	1.69492	ATAAA	GTAAG	missense_variant	MODERATE	MPN042	p.Asp267Gly	gene
1723	p2_2_S1	2	50134	1.16421e-15	67	66	1	1.51515	A	C	missense_variant	MODERATE	MPN042	p.Thr282Pro	gene
1724	p2_2_S1	2	50165	1.13007e-17	80	79	1	1.26582	ATCT	TTCA	missense_variant	MODERATE	MPN042	p.AsnLeu292IleHis	gene
1725	p2_2_S1	2	50185	0	81	80	1	1.25	A	G	missense_variant	MODERATE	MPN042	p.Ile299Val	gene
1726	p2_2_S1	2	50241	3.90275e-15	74	73	1	1.36986	T	A	missense_variant	MODERATE	MPN042	p.Asp317Glu	gene
1727	p2_2_S1	2	50323	5.33394e-15	65	63	2	3.1746	CAAAAGGAG	TAAATGGAA	stop_gained	HIGH	MPN042	p.GlnLys345*	gene
1728	p2_2_S1	2	50342	0	70	69	1	1.44928	AACA	TACT	missense_variant	MODERATE	MPN042	p.GlnGln351LeuLeu	gene
1729	p2_2_S1	2	50367	0	70	68	2	2.94118	GAAAAATG	GAAAATG	frameshift_variant	HIGH	MPN042	p.Asn361fs	gene
1730	p2_2_S1	2	50375	0	71	70	1	1.42857	ACGAA	TCCAT	missense_variant	MODERATE	MPN042	p.AspGlu362ValHis	gene
1731	p2_2_S1	2	50390	0	56	55	1	1.81818	AAGCG	TAGCA	missense_variant	MODERATE	MPN042	p.Lys367Ile	gene
1732	p2_2_S1	2	50410	1.30712e-15	53	52	1	1.92308	AAGGCG	TTGGCA	missense_variant	MODERATE	MPN042	p.Lys374Leu	gene
1733	p2_2_S1	2	50498	2.0492e-15	65	64	1	1.5625	T	C	missense_variant	MODERATE	MPN042	p.Val403Ala	gene
1734	p2_2_S1	2	50526	7.68684e-16	64	63	1	1.5873	ACTA	TCTT	synonymous_variant	LOW	MPN042	p.414	gene
1735	p2_2_S1	2	50540	2.41129e-15	60	59	1	1.69492	T	A	missense_variant	MODERATE	MPN042	p.Phe417Tyr	gene
1736	p2_2_S1	2	50549	1.55973e-15	56	55	1	1.81818	ACCG	TCCA	missense_variant	MODERATE	MPN042	p.TyrArg420PheHis	gene
1737	p2_2_S1	2	50560	3.81964e-15	61	60	1	1.66667	A	G	missense_variant	MODERATE	MPN042	p.Thr424Ala	gene
1738	p2_2_S1	2	50572	0	46	45	1	2.22222	A	G	missense_variant	MODERATE	MPN042	p.Thr428Ala	gene
1739	p2_2_S1	2	50662	0	59	58	1	1.72414	TTT	ATA	missense_variant	MODERATE	MPN042	p.Phe458Ile	gene
1740	p2_2_S1	2	50705	0	71	70	1	1.42857	T	A	missense_variant	MODERATE	MPN042	p.Val472Glu	gene
1741	p2_2_S1	2	50804	1.49946e-15	71	70	1	1.42857	ACGTT	GCGTA	missense_variant	MODERATE	MPN042	p.Asn505Ser	gene
1742	p2_2_S1	2	50817	4.97467e-16	73	72	1	1.38889	T	C	synonymous_variant	LOW	MPN042	p.Ser509Ser	gene
1743	p2_2_S1	2	50839	0	77	76	1	1.31579	A	G	missense_variant	MODERATE	MPN042	p.Asn517Asp	gene
1744	p2_2_S1	2	50852	0	80	79	1	1.26582	A	T	missense_variant	MODERATE	MPN042	p.Lys521Met	gene
1745	p2_2_S1	2	50861	0	76	75	1	1.33333	T	C	missense_variant	MODERATE	MPN042	p.Ile524Thr	gene
1746	p2_2_S1	2	50888	0	84	83	1	1.20482	A	C	missense_variant	MODERATE	MPN042	p.His533Pro	gene
1747	p2_2_S1	2	50908	0	81	80	1	1.25	AAATT	TAATC	stop_gained	HIGH	MPN042	p.LysPhe540*	gene
1748	p2_2_S1	2	50945	6.35853e-15	73	72	1	1.38889	TAACAGTG	AAATAGTA	missense_variant	MODERATE	MPN042	p.ValThr552GluIle	gene
1749	p2_2_S1	2	50965	0	87	86	1	1.16279	GAGGT	AAAGA	missense_variant	MODERATE	MPN042	p.GluVal559LysGlu	gene
1750	p2_2_S1	2	51003	2.48992e-15	90	89	1	1.1236	T	A	synonymous_variant	LOW	MPN042	p.Gly571Gly	gene
1751	p2_2_S1	2	51005	0	88	86	2	2.32558	G	A	missense_variant	MODERATE	MPN042	p.Ser572Asn	gene
1752	p2_2_S1	2	51029	0	71	70	1	1.42857	A	G	missense_variant	MODERATE	MPN042	p.Lys580Arg	gene
1753	p2_2_S1	2	51034	4.77691e-15	69	67	2	2.98507	A	G	missense_variant	MODERATE	MPN042	p.Lys582Glu	gene
1754	p2_2_S1	2	51094	0	64	63	1	1.5873	C	T	missense_variant	MODERATE	MPN042	p.Arg602Cys	gene
1755	p2_2_S1	2	51126	0	56	55	1	1.81818	ACAAAAGA	GCAATAGT	stop_gained	HIGH	MPN042	p.LysIle614*	gene
1756	p2_2_S1	2	51148	0	75	74	1	1.35135	CATG	TATA	missense_variant	MODERATE	MPN042	p.HisAla620TyrThr	gene
1757	p2_2_S1	2	51247	2.38869e-15	69	68	1	1.47059	GATT	AATA	missense_variant	MODERATE	MPN042	p.AspLeu653AsnIle	gene
1758	p2_2_S1	2	51315	1.20564e-15	55	54	1	1.85185	TAGTGG	AAGTAA	upstream_gene_variant	MODIFIER	MPN038	c.-4529_-4524delCCACTAinsTTACTT	intergenic
1759	p2_2_S1	2	51362	0	54	53	1	1.88679	ATTA	GTTG	upstream_gene_variant	MODIFIER	MPN038	c.-4574_-4571delTAATinsCAAC	intergenic
1760	p2_2_S1	2	51421	7.08649e-16	42	41	1	2.43902	A	G	upstream_gene_variant	MODIFIER	MPN038	c.-4630T>C	intergenic
1761	p2_2_S1	2	51452	0	39	38	1	2.63158	G	A	upstream_gene_variant	MODIFIER	MPN038	c.-4661C>T	intergenic
1762	p2_2_S1	2	51465	0	38	37	1	2.7027	G	T	upstream_gene_variant	MODIFIER	MPN038	c.-4674C>A	intergenic
1763	p2_2_S1	2	51477	0	29	28	1	3.57143	G	T	upstream_gene_variant	MODIFIER	MPN038	c.-4686C>A	intergenic
1764	p2_2_S1	2	51497	0	26	25	1	4	AA	GC	upstream_gene_variant	MODIFIER	MPN038	c.-4707_-4706delTTinsGC	intergenic
1765	p2_2_S1	2	51639	0	46	44	2	4.54545	A	G	missense_variant	MODERATE	MPN043	p.Asn3Asp	gene
1766	p2_2_S1	2	51682	0	53	52	1	1.92308	A	G	missense_variant	MODERATE	MPN043	p.Glu17Gly	gene
1767	p2_2_S1	2	51685	5.72593e-15	57	55	2	3.63636	TTT	CTC	missense_variant	MODERATE	MPN043	p.Phe18Ser	gene
1768	p2_2_S1	2	51699	2.30558e-15	63	62	1	1.6129	TTTT	ATTA	missense_variant	MODERATE	MPN043	p.PheLeu23IleIle	gene
1769	p2_2_S1	2	51792	5.46225e-15	66	65	1	1.53846	T	A	missense_variant	MODERATE	MPN043	p.Phe54Ile	gene
1770	p2_2_S1	2	51899	6.38867e-15	71	69	2	2.89855	A	T	synonymous_variant	LOW	MPN043	p.Gly89Gly	gene
1771	p2_2_S1	2	51946	0	77	76	1	1.31579	CAT	TAA	missense_variant	MODERATE	MPN043	p.ProLeu105LeuIle	gene
1772	p2_2_S1	2	51955	2.27521e-15	69	68	1	1.47059	G	A	stop_gained	HIGH	MPN043	p.Trp108*	gene
1773	p2_2_S1	2	51961	6.29544e-16	64	63	1	1.5873	C	A	missense_variant	MODERATE	MPN043	p.Ala110Glu	gene
1774	p2_2_S1	2	51995	0	65	64	1	1.5625	GGC	AGT	missense_variant	MODERATE	MPN043	p.Ala122Val	gene
1775	p2_2_S1	2	52052	3.6765e-15	70	69	1	1.44928	T	A	synonymous_variant	LOW	MPN043	p.Thr140Thr	gene
1776	p2_2_S1	2	52063	6.25777e-16	64	63	1	1.5873	C	T	missense_variant	MODERATE	MPN043	p.Ser144Leu	gene
1777	p2_2_S1	2	52066	0	63	62	1	1.6129	T	A	missense_variant	MODERATE	MPN043	p.Val145Asp	gene
1778	p2_2_S1	2	52069	2.78986e-16	69	68	1	1.47059	T	A	stop_gained	HIGH	MPN043	p.Leu146*	gene
1779	p2_2_S1	2	52080	1.22848e-15	77	75	2	2.66667	T	A	missense_variant	MODERATE	MPN043	p.Cys150Ser	gene
1780	p2_2_S1	2	52081	0	86	85	1	1.17647	G	C	missense_variant	MODERATE	MPN043	p.Cys150Ser	gene
1781	p2_2_S1	2	52089	0	77	76	1	1.31579	C	T	missense_variant	MODERATE	MPN043	p.Pro153Ser	gene
1782	p2_2_S1	2	52093	1.0738e-15	64	63	1	1.5873	CAA	TAG	missense_variant	MODERATE	MPN043	p.AlaIle154ValVal	gene
1783	p2_2_S1	2	52124	5.45495e-15	66	65	1	1.53846	TGAGTTT	AGAGATA	missense_variant	MODERATE	MPN043	p.Phe166Ile	gene
1784	p2_2_S1	2	52134	0	71	70	1	1.42857	G	A	missense_variant	MODERATE	MPN043	p.Ala168Thr	gene
1785	p2_2_S1	2	52137	0	66	64	2	3.125	ACTAGCGTTTTAA	TCTTGCCTCTTAT	missense_variant	MODERATE	MPN043	p.ThrSerValLeuIle169SerCysLeuLeuPhe	gene
1786	p2_2_S1	2	52159	0	72	71	1	1.40845	TACTG	AACAA	stop_gained	HIGH	MPN043	p.LeuLeu176*	gene
1787	p2_2_S1	2	52183	5.83164e-15	61	60	1	1.66667	C	T	missense_variant	MODERATE	MPN043	p.Ala184Val	gene
1788	p2_2_S1	2	52188	7.83751e-16	55	54	1	1.85185	C	T	missense_variant	MODERATE	MPN043	p.Arg186Trp	gene
1789	p2_2_S1	2	52215	7.45871e-15	66	65	1	1.53846	G	T	missense_variant	MODERATE	MPN043	p.Val195Leu	gene
1790	p2_2_S1	2	52218	1.16421e-15	67	66	1	1.51515	C	G	missense_variant	MODERATE	MPN043	p.Pro196Ala	gene
1791	p2_2_S1	2	52219	0	58	57	1	1.75439	C	G	missense_variant	MODERATE	MPN043	p.Pro196Arg	gene
1792	p2_2_S1	2	52237	2.20034e-15	56	55	1	1.81818	G	C	missense_variant	MODERATE	MPN043	p.Gly202Ala	gene
1793	p2_2_S1	2	52242	2.1848e-15	56	55	1	1.81818	A	G	missense_variant	MODERATE	MPN043	p.Ile204Val	gene
1794	p2_2_S1	2	52275	5.91427e-15	80	77	3	3.8961	ATTA	GTTT	missense_variant	MODERATE	MPN043	p.IleAsn215ValTyr	gene
1795	p2_2_S1	2	52285	0	68	67	1	1.49254	C	G	missense_variant	MODERATE	MPN043	p.Ala218Gly	gene
1796	p2_2_S1	2	52286	3.68403e-15	70	69	1	1.44928	C	T	synonymous_variant	LOW	MPN043	p.Ala218Ala	gene
1797	p2_2_S1	2	52287	0	68	67	1	1.49254	C	T	missense_variant	MODERATE	MPN043	p.Arg219Cys	gene
1798	p2_2_S1	2	52311	3.6765e-15	70	69	1	1.44928	T	C	missense_variant	MODERATE	MPN043	p.Tyr227His	gene
1799	p2_2_S1	2	52330	0	68	67	1	1.49254	AAAATAA	GAAACAG	missense_variant	MODERATE	MPN043	p.LysAsnLys233ArgAsnArg	gene
1800	p2_2_S1	2	52341	0	67	66	1	1.51515	CCTA	TCTG	missense_variant	MODERATE	MPN043	p.ProAsn237SerAsp	gene
1801	p2_2_S1	2	52346	0	70	69	1	1.44928	CTT	TTA	stop_gained	HIGH	MPN043	p.Leu239*	gene
1802	p2_2_S1	2	52357	5.80103e-15	70	69	1	1.44928	GTT	ATA	missense_variant	MODERATE	MPN043	p.SerTrp242AsnArg	gene
1803	p2_2_S1	2	52379	0	62	61	1	1.63934	T	A	synonymous_variant	LOW	MPN043	p.Pro249Pro	gene
1804	p2_2_S1	2	52381	0	59	58	1	1.72414	T	A	missense_variant	MODERATE	MPN043	p.Leu250Gln	gene
1805	p2_2_S1	2	52388	2.19634e-15	56	55	1	1.81818	T	A	synonymous_variant	LOW	MPN043	p.Ala252Ala	gene
1806	p2_2_S1	2	52399	1.17551e-15	48	45	3	6.66667	TAGGTGTGCTTGTGGCT	AAGGAGAGCTAGAGGTA	stop_gained	HIGH	MPN043	p.LeuGlyValLeuValAla256*	gene
1807	p2_2_S1	2	52424	0	63	62	1	1.6129	T	G	synonymous_variant	LOW	MPN043	p.Val264Val	gene
1808	p2_2_S1	2	52452	0	67	66	1	1.51515	CTTGGTC	GTAGGTT	upstream_gene_variant	MODIFIER	MPN045	c.-623_-617delCTTGGTCinsGTAGGTT	intergenic
1809	p2_2_S1	2	52461	0	75	74	1	1.35135	A	T	upstream_gene_variant	MODIFIER	MPN045	c.-614A>T	intergenic
1810	p2_2_S1	2	52495	0	85	84	1	1.19048	A	G	missense_variant	MODERATE	MPN044	p.Leu185Ser	gene
1811	p2_2_S1	2	52589	1.91359e-15	74	73	1	1.36986	C	T	missense_variant	MODERATE	MPN044	p.Gly154Ser	gene
1812	p2_2_S1	2	52672	2.41129e-15	60	59	1	1.69492	C	T	missense_variant	MODERATE	MPN044	p.Arg126His	gene
1813	p2_2_S1	2	52695	6.33311e-16	64	63	1	1.5873	A	G	synonymous_variant	LOW	MPN044	p.Val118Val	gene
1814	p2_2_S1	2	52746	3.14207e-15	64	62	2	3.22581	T	A	missense_variant	MODERATE	MPN044	p.Glu101Asp	gene
1815	p2_2_S1	2	52813	2.71688e-16	69	68	1	1.47059	T	A	missense_variant	MODERATE	MPN044	p.Tyr79Phe	gene
1816	p2_2_S1	2	52851	2.79528e-15	72	71	1	1.40845	A	C	missense_variant	MODERATE	MPN044	p.Ser66Arg	gene
1817	p2_2_S1	2	52859	1.95102e-15	62	61	1	1.63934	CGT	TGA	missense_variant	MODERATE	MPN044	p.AsnGly63IleSer	gene
1818	p2_2_S1	2	52941	6.70532e-15	56	54	2	3.7037	G	T	synonymous_variant	LOW	MPN044	p.Arg36Arg	gene
1819	p2_2_S1	2	52972	0	55	54	1	1.85185	T	C	missense_variant	MODERATE	MPN044	p.Lys26Arg	gene
1820	p2_2_S1	2	53014	0	54	53	1	1.88679	C	T	missense_variant	MODERATE	MPN044	p.Arg12His	gene
1821	p2_2_S1	2	53022	5.06295e-15	51	49	2	4.08163	T	C	synonymous_variant	LOW	MPN044	p.Gln9Gln	gene
1822	p2_2_S1	2	53060	3.57479e-15	57	56	1	1.78571	TATA	AATG	upstream_gene_variant	MODIFIER	MPN044	c.-15_-12delTATAinsCATT	intergenic
1823	p2_2_S1	2	53092	0	68	67	1	1.49254	ACCGCGCGG	CCCGGGCAA	missense_variant	MODERATE	MPN045	p.LysProArgGly6AsnProGlyLys	essential
1824	p2_2_S1	2	53111	1.57103e-15	56	55	1	1.81818	TGGTATG	AGGAATA	missense_variant	MODERATE	MPN045	p.TrpTyrGly13ArgAsnSer	essential
1825	p2_2_S1	2	53119	0	54	53	1	1.88679	T	C	synonymous_variant	LOW	MPN045	p.Gly15Gly	essential
1826	p2_2_S1	2	53140	0	49	48	1	2.08333	TTGAACG	ATAAACA	stop_gained	HIGH	MPN045	p.AsnTrp22*	essential
1827	p2_2_S1	2	53203	1.41659e-15	65	64	1	1.5625	CCTGT	TCTGC	synonymous_variant	LOW	MPN045	p.46	essential
1828	p2_2_S1	2	53214	3.59386e-15	67	66	1	1.51515	ACG	TCA	missense_variant	MODERATE	MPN045	p.TyrAla47PheThr	essential
1829	p2_2_S1	2	53220	3.58633e-15	67	66	1	1.51515	AAG	TAA	missense_variant	MODERATE	MPN045	p.GluAla49ValThr	essential
1830	p2_2_S1	2	53229	6.56171e-15	65	63	2	3.1746	A	G	missense_variant	MODERATE	MPN045	p.Lys52Arg	essential
1831	p2_2_S1	2	53343	0	79	77	2	2.5974	T	C	missense_variant	MODERATE	MPN045	p.Val90Ala	essential
1832	p2_2_S1	2	53355	0	83	82	1	1.21951	AACTA	TACTT	missense_variant	MODERATE	MPN045	p.Lys94Ile	essential
1833	p2_2_S1	2	53382	0	81	80	1	1.25	TAA	AAT	stop_gained	HIGH	MPN045	p.LeuArg103*	essential
1834	p2_2_S1	2	53393	1.20541e-16	78	77	1	1.2987	A	T	missense_variant	MODERATE	MPN045	p.Thr107Ser	essential
1835	p2_2_S1	2	53555	0	57	55	2	3.63636	A	G	missense_variant	MODERATE	MPN045	p.Ile161Val	essential
1836	p2_2_S1	2	53588	2.80281e-15	72	71	1	1.40845	A	T	missense_variant	MODERATE	MPN045	p.Thr172Ser	essential
1837	p2_2_S1	2	53654	2.27521e-15	69	68	1	1.47059	T	C	synonymous_variant	LOW	MPN045	p.Leu194Leu	essential
1838	p2_2_S1	2	53656	1.37115e-15	68	66	2	3.0303	A	T	missense_variant	MODERATE	MPN045	p.Leu194Phe	essential
1839	p2_2_S1	2	53731	0	72	70	2	2.85714	T	C	synonymous_variant	LOW	MPN045	p.Ser219Ser	essential
1840	p2_2_S1	2	53741	0	66	64	2	3.125	C	A	missense_variant	MODERATE	MPN045	p.Gln223Lys	essential
1841	p2_2_S1	2	53779	0	75	73	2	2.73973	G	T	synonymous_variant	LOW	MPN045	p.Leu235Leu	essential
1842	p2_2_S1	2	53782	0	80	79	1	1.26582	T	A	missense_variant	MODERATE	MPN045	p.Asn236Lys	essential
1843	p2_2_S1	2	53814	0	75	74	1	1.35135	A	G	missense_variant	MODERATE	MPN045	p.Gln247Arg	essential
1844	p2_2_S1	2	53864	5.38691e-15	88	87	1	1.14943	A	T	missense_variant	MODERATE	MPN045	p.Thr264Ser	essential
1845	p2_2_S1	2	53870	6.38867e-15	71	69	2	2.89855	G	T	missense_variant	MODERATE	MPN045	p.Val266Leu	essential
1846	p2_2_S1	2	53876	5.94935e-16	73	72	1	1.38889	TTTGAA	CCTGAG	missense_variant	MODERATE	MPN045	p.Phe268Pro	essential
1847	p2_2_S1	2	53907	2.26014e-17	75	74	1	1.35135	TAGCT	AAGCA	missense_variant	MODERATE	MPN045	p.Leu278Gln	essential
1848	p2_2_S1	2	53922	6.33311e-16	64	63	1	1.5873	A	G	missense_variant	MODERATE	MPN045	p.Tyr283Cys	essential
1849	p2_2_S1	2	53944	0	62	61	1	1.63934	AG	GA	missense_variant	MODERATE	MPN045	p.Gly291Ser	essential
1850	p2_2_S1	2	53991	8.21656e-16	42	40	2	5	GCTCA	ACTCT	missense_variant	MODERATE	MPN045	p.Arg306His	essential
1851	p2_2_S1	2	54060	0	57	56	1	1.78571	T	C	missense_variant	MODERATE	MPN045	p.Val329Ala	essential
1852	p2_2_S1	2	54067	0	49	48	1	2.08333	TCTCA	CCTCT	missense_variant	MODERATE	MPN045	p.Thr333Ser	essential
1853	p2_2_S1	2	54090	0	43	42	1	2.38095	A	T	missense_variant	MODERATE	MPN045	p.Lys339Met	essential
1854	p2_2_S1	2	54151	2.09087e-15	53	52	1	1.92308	TAT	AAA	missense_variant	MODERATE	MPN045	p.Ile360Asn	essential
1855	p2_2_S1	2	54179	1.84202e-15	61	60	1	1.66667	GCGC	ACGT	stop_gained	HIGH	MPN045	p.AlaGln369*	essential
1856	p2_2_S1	2	54187	0	73	72	1	1.38889	GTTAG	GTAG	frameshift_variant	HIGH	MPN045	p.Leu372fs	essential
1857	p2_2_S1	2	54221	7.24752e-15	62	61	1	1.63934	A	T	missense_variant	MODERATE	MPN045	p.Asn383Tyr	essential
1858	p2_2_S1	2	54223	5.95948e-15	61	60	1	1.66667	TAATT	AAATA	missense_variant	MODERATE	MPN045	p.AsnAsnLeu383LysAsnIle	essential
1859	p2_2_S1	2	54328	0	66	64	2	3.125	T	C	missense_variant	MODERATE	MPN046	p.Val13Ala	essential
1860	p2_2_S1	2	54367	4.89698e-16	73	72	1	1.38889	C	T	missense_variant	MODERATE	MPN046	p.Thr26Ile	essential
1861	p2_2_S1	2	54375	3.80104e-15	77	76	1	1.31579	ATTG	TTTC	missense_variant	MODERATE	MPN046	p.IleAla29PhePro	essential
1862	p2_2_S1	2	54426	2.93842e-15	63	62	1	1.6129	A	T	missense_variant	MODERATE	MPN046	p.Ile46Phe	essential
1863	p2_2_S1	2	54436	5.68049e-15	70	69	1	1.44928	A	G	missense_variant	MODERATE	MPN046	p.Asp49Gly	essential
1864	p2_2_S1	2	54489	9.02574e-15	73	69	4	5.7971	T	C	synonymous_variant	LOW	MPN046	p.Leu67Leu	essential
1865	p2_2_S1	2	54492	3.90275e-15	74	73	1	1.36986	A	G	missense_variant	MODERATE	MPN046	p.Thr68Ala	essential
1866	p2_2_S1	2	54573	3.66896e-15	70	69	1	1.44928	A	T	missense_variant	MODERATE	MPN046	p.Thr95Ser	essential
1867	p2_2_S1	2	54590	0	71	70	1	1.42857	C	A	synonymous_variant	LOW	MPN046	p.Ser100Ser	essential
1868	p2_2_S1	2	54598	5.39138e-16	67	66	1	1.51515	CCCC	TCCT	missense_variant	MODERATE	MPN046	p.ProPro103LeuLeu	essential
1869	p2_2_S1	2	54651	2.01906e-15	74	72	2	2.77778	TACCG	AACCA	missense_variant	MODERATE	MPN046	p.TyrArg121AsnHis	essential
1870	p2_2_S1	2	54666	3.39045e-15	88	87	1	1.14943	T	C	synonymous_variant	LOW	MPN046	p.Leu126Leu	essential
1871	p2_2_S1	2	54691	1.00977e-15	76	75	1	1.33333	G	A	missense_variant	MODERATE	MPN046	p.Arg134His	essential
1872	p2_2_S1	2	54697	3.90275e-15	74	73	1	1.36986	C	T	missense_variant	MODERATE	MPN046	p.Ala136Val	essential
1873	p2_2_S1	2	54701	2.78774e-15	76	74	2	2.7027	A	G	synonymous_variant	LOW	MPN046	p.Leu137Leu	essential
1874	p2_2_S1	2	54712	0	77	76	1	1.31579	T	C	missense_variant	MODERATE	MPN046	p.Val141Ala	essential
1875	p2_2_S1	2	54718	1.89122e-15	74	73	1	1.36986	T	A	stop_gained	HIGH	MPN046	p.Leu143*	essential
1876	p2_2_S1	2	54763	7.45871e-15	66	65	1	1.53846	A	G	missense_variant	MODERATE	MPN046	p.Glu158Gly	essential
1877	p2_2_S1	2	54792	2.17751e-15	65	64	1	1.5625	GAG	AAA	missense_variant	MODERATE	MPN046	p.Glu168Lys	essential
1878	p2_2_S1	2	54827	0	66	65	1	1.53846	TAGGG	CAGGA	missense_variant	MODERATE	MPN046	p.Glu181Lys	essential
1879	p2_2_S1	2	54883	2.93842e-15	63	62	1	1.6129	T	A	stop_gained	HIGH	MPN046	p.Leu198*	essential
1880	p2_2_S1	2	54885	0	55	54	1	1.85185	A	G	missense_variant	MODERATE	MPN046	p.Met199Val	essential
1881	p2_2_S1	2	54989	1.59764e-15	40	39	1	2.5641	G	A	synonymous_variant	LOW	MPN046	p.Val233Val	essential
1882	p2_2_S1	2	55004	1.4545e-15	49	48	1	2.08333	G	C	missense_variant	MODERATE	MPN046	p.Lys238Asn	essential
1883	p2_2_S1	2	55050	4.93464e-15	60	58	2	3.44828	C	T	missense_variant	MODERATE	MPN046	p.Arg254Cys	essential
1884	p2_2_S1	2	55066	0	57	56	1	1.78571	T	C	missense_variant	MODERATE	MPN046	p.Ile259Thr	essential
1885	p2_2_S1	2	55068	3.61646e-15	57	56	1	1.78571	AA	TT	missense_variant	MODERATE	MPN046	p.Lys260Leu	essential
1886	p2_2_S1	2	55078	0	56	55	1	1.81818	AAC	TAG	missense_variant	MODERATE	MPN046	p.LysPro263IleAla	essential
1887	p2_2_S1	2	55088	2.63707e-15	60	59	1	1.69492	AGTGT	TGTGC	synonymous_variant	LOW	MPN046	p.269	essential
1888	p2_2_S1	2	55198	1.24543e-16	78	77	1	1.2987	A	T	missense_variant	MODERATE	MPN046	p.Gln303Leu	essential
1889	p2_2_S1	2	55209	1.01753e-15	76	75	1	1.33333	T	C	synonymous_variant	LOW	MPN046	p.Leu307Leu	essential
1890	p2_2_S1	2	55213	3.52982e-15	79	78	1	1.28205	T	C	missense_variant	MODERATE	MPN046	p.Ile308Thr	essential
1891	p2_2_S1	2	55227	5.53005e-15	79	78	1	1.28205	A	G	missense_variant	MODERATE	MPN046	p.Ile313Val	essential
1892	p2_2_S1	2	55273	0	71	69	2	2.89855	C	A	missense_variant	MODERATE	MPN046	p.Ser328Tyr	essential
1893	p2_2_S1	2	55278	2.64484e-15	70	67	3	4.47761	AA	TT	missense_variant	MODERATE	MPN046	p.Lys330Leu	essential
1894	p2_2_S1	2	55322	2.41129e-15	60	59	1	1.69492	G	C	missense_variant	MODERATE	MPN046	p.Glu344Asp	essential
1895	p2_2_S1	2	55325	0	51	50	1	2	TTACTCT	ATACACA	missense_variant	MODERATE	MPN046	p.PheTyrSer345LeuTyrThr	essential
1896	p2_2_S1	2	55359	0	49	47	2	4.25532	C	T	synonymous_variant	LOW	MPN046	p.Leu357Leu	essential
1897	p2_2_S1	2	55360	9.26894e-16	46	45	1	2.22222	T	A	missense_variant	MODERATE	MPN046	p.Leu357Gln	essential
1898	p2_2_S1	2	55402	0	54	53	1	1.88679	A	T	missense_variant	MODERATE	MPN046	p.Lys371Ile	essential
1899	p2_2_S1	2	55408	2.49393e-15	47	46	1	2.17391	AAACGCA	TAACACT	missense_variant	MODERATE	MPN046	p.LysThrGln373IleThrLeu	essential
1900	p2_2_S1	2	55430	0	55	53	2	3.77358	A	T	missense_variant	MODERATE	MPN046	p.Leu380Phe	essential
1901	p2_2_S1	2	55440	0	55	54	1	1.85185	CGCAA	TGCAT	missense_variant	MODERATE	MPN046	p.ArgAsn384CysIle	essential
1902	p2_2_S1	2	55465	7.30779e-16	64	63	1	1.5873	ACTTA	GCTTT	missense_variant	MODERATE	MPN046	p.AsnLeu392SerPhe	essential
1903	p2_2_S1	2	55497	0	62	61	1	1.63934	TG	GA	missense_variant	MODERATE	MPN046	p.Trp403Glu	essential
1904	p2_2_S1	2	55499	3.1496e-15	64	62	2	3.22581	A	G	synonymous_variant	LOW	MPN046	p.Trp403Trp	essential
1905	p2_2_S1	2	55507	2.0492e-15	65	64	1	1.5625	A	T	missense_variant	MODERATE	MPN046	p.Asp406Val	essential
1906	p2_2_S1	2	55535	0	59	58	1	1.72414	G	T	missense_variant	MODERATE	MPN046	p.Lys415Asn	essential
1907	p2_2_S1	2	55571	5.83164e-15	61	60	1	1.66667	C	T	synonymous_variant	LOW	MPN046	p.Ser427Ser	essential
1908	p2_2_S1	2	55646	0	68	67	1	1.49254	TTTA	CTTG	synonymous_variant	LOW	MPN046	p.454	essential
1909	p2_2_S1	2	55689	0	73	72	1	1.38889	G	A	missense_variant	MODERATE	MPN046	p.Asp467Asn	essential
1910	p2_2_S1	2	55711	0	77	76	1	1.31579	TAATG	TATG	frameshift_variant	HIGH	MPN046	p.Met475fs	essential
1911	p2_2_S1	2	55745	0	87	86	1	1.16279	TGGCTT	AAGCTA	missense_variant	MODERATE	MPN046	p.PheGlyPhe485LeuSerTyr	essential
1912	p2_2_S1	2	55769	5.24377e-15	97	96	1	1.04167	G	A	synonymous_variant	LOW	MPN046	p.Gln493Gln	essential
1913	p2_2_S1	2	55789	0	89	88	1	1.13636	C	T	missense_variant	MODERATE	MPN046	p.Ala500Val	essential
1914	p2_2_S1	2	55799	0	90	89	1	1.1236	TTT	ATA	stop_gained	HIGH	MPN046	p.Leu504*	essential
1915	p2_2_S1	2	55879	0	94	93	1	1.07527	AAGGGAT	TAGAGAC	missense_variant	MODERATE	MPN046	p.GlnGlyIle530LeuGluThr	essential
1916	p2_2_S1	2	55944	3.37161e-15	97	96	1	1.04167	TCC	ACT	stop_gained	HIGH	MPN047	p.ValGln2*	gene
1917	p2_2_S1	2	55950	0	96	95	1	1.05263	C	T	missense_variant	MODERATE	MPN046	p.His554Tyr	essential
1918	p2_2_S1	2	55959	4.49039e-15	87	85	2	2.35294	A	T	stop_gained	HIGH	MPN046	p.Lys557*	essential
1919	p2_2_S1	2	55962	0	84	83	1	1.20482	TAAA	CAAC	missense_variant	MODERATE	MPN047	p.IleAsn8ThrThr	gene
1920	p2_2_S1	2	55969	0	82	80	2	2.5	CCACC	TCACT	missense_variant	MODERATE	MPN047	p.Leu12Phe	gene
1921	p2_2_S1	2	55999	0	72	71	1	1.40845	TT	AA	missense_variant	MODERATE	MPN047	p.Tyr21Asn	gene
1922	p2_2_S1	2	56016	1.74784e-15	78	77	1	1.2987	GCTT	ACTA	stop_gained	HIGH	MPN047	p.ArgLeu26*	gene
1923	p2_2_S1	2	56031	0	73	72	1	1.38889	ATGA	GTGG	missense_variant	MODERATE	MPN047	p.AsnAsp31SerGly	gene
1924	p2_2_S1	2	56060	0	64	63	1	1.5873	A	C	missense_variant	MODERATE	MPN047	p.Thr41Pro	gene
1925	p2_2_S1	2	56068	4.14595e-16	60	59	1	1.69492	G	A	synonymous_variant	LOW	MPN047	p.Arg43Arg	gene
1926	p2_2_S1	2	56279	4.18362e-16	55	54	1	1.85185	TTTT	ATAA	missense_variant	MODERATE	MPN047	p.PheLeu114IleIle	gene
1927	p2_2_S1	2	56308	0	57	56	1	1.78571	A	T	missense_variant	MODERATE	MPN047	p.Leu123Phe	gene
1928	p2_2_S1	2	56311	4.14595e-16	60	59	1	1.69492	G	A	synonymous_variant	LOW	MPN047	p.Thr124Thr	gene
1929	p2_2_S1	2	56316	0	59	58	1	1.72414	AGAT	TGAC	missense_variant	MODERATE	MPN047	p.LysIle126MetThr	gene
1930	p2_2_S1	2	56331	2.41129e-15	60	59	1	1.69492	C	T	missense_variant	MODERATE	MPN047	p.Ser131Phe	gene
1931	p2_2_S1	2	56332	0	59	58	1	1.72414	T	A	synonymous_variant	LOW	MPN047	p.Ser131Ser	gene
1932	p2_2_S1	2	56400	0	84	83	1	1.20482	TTTG	ATTA	stop_gained	HIGH	MPN047	p.ValTrp154*	gene
1933	p2_2_S1	2	56430	3.90275e-15	74	73	1	1.36986	T	A	stop_gained	HIGH	MPN047	p.Leu164*	gene
1934	p2_2_S1	2	56449	0	73	72	1	1.38889	G	C	missense_variant	MODERATE	MPN047	p.Leu170Phe	gene
1935	p2_2_S1	2	56488	2.19257e-15	56	55	1	1.81818	G	A	synonymous_variant	LOW	MPN047	p.Leu183Leu	gene
1936	p2_2_S1	2	56532	1.73278e-16	66	65	1	1.53846	TTA	CTG	missense_variant	MODERATE	MPN047	p.PheThr198SerAla	gene
1937	p2_2_S1	2	56551	1.15668e-15	67	66	1	1.51515	T	C	synonymous_variant	LOW	MPN047	p.His204His	gene
1938	p2_2_S1	2	56554	0	64	63	1	1.5873	TTTTAGTATGCGTG	ATTAAGAAAGTGTA	missense_variant	MODERATE	MPN047	p.AspPheSerMetArgGly205GluLeuArgLysCysSer	gene
1939	p2_2_S1	2	56582	2.80281e-15	72	71	1	1.40845	C	T	stop_gained	HIGH	MPN047	p.Gln215*	gene
1940	p2_2_S1	2	56592	7.3231e-15	75	74	1	1.35135	T	A	stop_gained	HIGH	MPN047	p.Leu218*	gene
1941	p2_2_S1	2	56641	0	68	67	1	1.49254	TTT	ATA	stop_gained	HIGH	MPN047	p.Leu235*	gene
1942	p2_2_S1	2	56649	1.91359e-15	74	73	1	1.36986	G	C	missense_variant	MODERATE	MPN047	p.Gly237Ala	gene
1943	p2_2_S1	2	56686	2.63919e-16	69	68	1	1.47059	G	A	synonymous_variant	LOW	MPN047	p.Ser249Ser	gene
1944	p2_2_S1	2	56688	0	72	71	1	1.40845	T	C	missense_variant	MODERATE	MPN047	p.Val250Ala	gene
1945	p2_2_S1	2	56695	0	69	68	1	1.47059	TGCTGATG	AGCAGATA	missense_variant	MODERATE	MPN047	p.CysAlaAspGly252TrpAlaAspSer	gene
1946	p2_2_S1	2	56710	1.47663e-15	74	72	2	2.77778	GGGTG	AGGTA	missense_variant	MODERATE	MPN047	p.Glu259Lys	gene
1947	p2_2_S1	2	56766	2.41129e-15	60	59	1	1.69492	C	A	missense_variant	MODERATE	MPN047	p.Ser276Tyr	gene
1948	p2_2_S1	2	56783	5.8241e-15	61	60	1	1.66667	T	A	missense_variant	MODERATE	MPN047	p.Tyr282Asn	gene
1949	p2_2_S1	2	56784	1.30335e-15	58	57	1	1.75439	A	G	missense_variant	MODERATE	MPN047	p.Tyr282Cys	gene
1950	p2_2_S1	2	56823	4.18903e-15	56	55	1	1.81818	T	A	missense_variant	MODERATE	MPN047	p.Leu295His	gene
1951	p2_2_S1	2	56836	0	56	55	1	1.81818	TTT	CTA	stop_gained	HIGH	MPN047	p.Leu300*	gene
1952	p2_2_S1	2	56891	8.21656e-16	49	48	1	2.08333	CTTA	TTTT	missense_variant	MODERATE	MPN047	p.LeuIle318PhePhe	gene
1953	p2_2_S1	2	56921	2.33925e-15	47	46	1	2.17391	G	A	missense_variant	MODERATE	MPN047	p.Glu328Lys	gene
1954	p2_2_S1	2	56929	1.70288e-15	47	46	1	2.17391	AACT	TACC	missense_variant	MODERATE	MPN047	p.Lys330Asn	gene
1955	p2_2_S1	2	56936	3.22847e-15	45	44	1	2.27273	T	C	missense_variant	MODERATE	MPN047	p.Trp333Arg	gene
1956	p2_2_S1	2	56966	6.18243e-16	39	38	1	2.63158	TTT	CTA	missense_variant	MODERATE	MPN047	p.Phe343Leu	gene
1957	p2_2_S1	2	56988	0	35	34	1	2.94118	A	T	missense_variant	MODERATE	MPN047	p.Lys350Ile	gene
1958	p2_2_S1	2	56994	1.73301e-15	40	39	1	2.5641	ATAAGG	GCAAGA	missense_variant	MODERATE	MPN047	p.TyrLysVal352CysLysIle	gene
1959	p2_2_S1	2	57001	3.13053e-15	42	41	1	2.43902	TTT	CTA	stop_gained	HIGH	MPN047	p.Leu355*	gene
1960	p2_2_S1	2	57031	0	46	45	1	2.22222	CGATG	TGATA	missense_variant	MODERATE	MPN047	p.Gly366Ser	gene
1961	p2_2_S1	2	57047	0	54	53	1	1.88679	G	A	missense_variant	MODERATE	MPN047	p.Glu370Lys	gene
1962	p2_2_S1	2	57050	5.61269e-16	51	50	1	2	C	T	missense_variant	MODERATE	MPN047	p.Arg371Trp	gene
1963	p2_2_S1	2	57052	0	48	47	1	2.12766	GATT	AATA	synonymous_variant	LOW	MPN047	p.373	gene
1964	p2_2_S1	2	57082	3.29251e-15	55	53	2	3.77358	A	T	missense_variant	MODERATE	MPN047	p.Gln381His	gene
1965	p2_2_S1	2	57098	0	62	60	2	3.33333	T	A	missense_variant	MODERATE	MPN047	p.Ser387Thr	gene
1966	p2_2_S1	2	57107	0	75	74	1	1.35135	G	T	missense_variant	MODERATE	MPN047	p.Val390Phe	gene
1967	p2_2_S1	2	57114	4.6413e-15	78	76	2	2.63158	G	A	missense_variant	MODERATE	MPN047	p.Gly392Glu	gene
1968	p2_2_S1	2	57125	0	82	81	1	1.23457	A	T	missense_variant	MODERATE	MPN047	p.Thr396Ser	gene
1969	p2_2_S1	2	57160	0	89	88	1	1.13636	A	T	synonymous_variant	LOW	MPN047	p.Gly407Gly	gene
1970	p2_2_S1	2	57206	0	91	90	1	1.11111	G	A	missense_variant	MODERATE	MPN047	p.Asp423Asn	gene
1971	p2_2_S1	2	57370	0	50	49	1	2.04082	T	C	upstream_gene_variant	MODIFIER	MPN044	c.-4322A>G	intergenic
1972	p2_2_S1	2	57478	2.19634e-15	56	55	1	1.81818	A	G	upstream_gene_variant	MODIFIER	MPN044	c.-4430T>C	intergenic
1973	p2_2_S1	2	57488	1.51453e-15	59	57	2	3.50877	T	A	upstream_gene_variant	MODIFIER	MPN044	c.-4440A>T	intergenic
1974	p2_2_S1	2	57489	0	62	61	1	1.63934	TTCTT	ATCTC	upstream_gene_variant	MODIFIER	MPN044	c.-4445_-4441delAAGAAinsGAGAT	intergenic
1975	p2_2_S1	2	57554	0	48	47	1	2.12766	TTATT	ATATC	upstream_gene_variant	MODIFIER	MPN044	c.-4510_-4506delAATAAinsGATAT	intergenic
1976	p2_2_S1	2	57566	9.1936e-16	46	45	1	2.22222	A	C	upstream_gene_variant	MODIFIER	MPN044	c.-4518T>G	intergenic
1977	p2_2_S1	2	57571	2.33572e-15	47	46	1	2.17391	A	T	upstream_gene_variant	MODIFIER	MPN044	c.-4523T>A	intergenic
1978	p2_2_S1	2	57655	0	58	57	1	1.75439	T	A	upstream_gene_variant	MODIFIER	MPN044	c.-4607A>T	intergenic
1979	p2_2_S1	2	57658	0	67	64	3	4.6875	TTT	ATA	upstream_gene_variant	MODIFIER	MPN044	c.-4612_-4610delAAAinsTAT	intergenic
1980	p2_2_S1	2	57666	6.33311e-16	64	63	1	1.5873	G	A	upstream_gene_variant	MODIFIER	MPN044	c.-4618C>T	intergenic
1981	p2_2_S1	2	57674	2.71688e-16	64	63	1	1.5873	AAAA	TAAG	upstream_gene_variant	MODIFIER	MPN044	c.-4629_-4626delTTTTinsCTTA	intergenic
1982	p2_2_S1	2	57695	0	63	62	1	1.6129	G	A	upstream_gene_variant	MODIFIER	MPN044	c.-4647C>T	intergenic
1983	p2_2_S1	2	57720	0	63	62	1	1.6129	AAGA	TAGT	upstream_gene_variant	MODIFIER	MPN044	c.-4675_-4672delTCTTinsACTA	intergenic
1984	p2_2_S1	2	57775	2.94643e-15	63	62	1	1.6129	T	A	upstream_gene_variant	MODIFIER	MPN044	c.-4727A>T	intergenic
1985	p2_2_S1	2	57776	1.5183e-15	62	61	1	1.63934	CAAAAGC	CAAAGC	upstream_gene_variant	MODIFIER	MPN044	c.-4732delT	intergenic
1986	p2_2_S1	2	57790	4.14595e-16	60	59	1	1.69492	A	T	upstream_gene_variant	MODIFIER	MPN044	c.-4742T>A	intergenic
1987	p2_2_S1	2	57792	0	63	62	1	1.6129	ACAA	GCAG	upstream_gene_variant	MODIFIER	MPN044	c.-4747_-4744delTTGTinsCTGC	intergenic
1988	p2_2_S1	2	57807	4.18903e-15	56	55	1	1.81818	C	T	upstream_gene_variant	MODIFIER	MPN044	c.-4759G>A	intergenic
1989	p2_2_S1	2	57809	0	57	55	2	3.63636	AAGAA	TACAA	upstream_gene_variant	MODIFIER	MPN044	c.-4763_-4761delCTTinsGTA	intergenic
1990	p2_2_S1	2	57826	0	53	52	1	1.92308	CG	TA	upstream_gene_variant	MODIFIER	MPN044	c.-4779_-4778delCGinsTA	intergenic
1991	p2_2_S1	2	57830	0	53	52	1	1.92308	GTTTA	ATTTT	upstream_gene_variant	MODIFIER	MPN044	c.-4786_-4782delTAAACinsAAAAT	intergenic
1992	p2_2_S1	2	57840	0	52	50	2	4	T	C	upstream_gene_variant	MODIFIER	MPN044	c.-4792A>G	intergenic
1993	p2_2_S1	2	57851	3.22471e-15	49	47	2	4.25532	T	C	upstream_gene_variant	MODIFIER	MPN044	c.-4803A>G	intergenic
1994	p2_2_S1	2	57854	0	53	52	1	1.92308	C	A	upstream_gene_variant	MODIFIER	MPN044	c.-4806G>T	intergenic
1995	p2_2_S1	2	57856	0	51	50	1	2	ACAAA	TCAAT	upstream_gene_variant	MODIFIER	MPN044	c.-4812_-4808delTTTGTinsATTGA	intergenic
1996	p2_2_S1	2	57899	0	65	64	1	1.5625	ACC	GCT	missense_variant	MODERATE	MPN048	p.Thr6Ala	gene
1997	p2_2_S1	2	57922	3.28097e-15	67	66	1	1.51515	TATTT	CATTC	missense_variant	MODERATE	MPN048	p.Phe15Leu	gene
1998	p2_2_S1	2	57948	0	70	68	2	2.94118	T	A	missense_variant	MODERATE	MPN048	p.Val22Glu	gene
1999	p2_2_S1	2	57952	3.14207e-15	76	75	1	1.33333	TAAG	AAAA	synonymous_variant	LOW	MPN048	p.25	gene
[truncated: 25,064 more rows]

## Sheet: C5_p2_2_S2
	SAMPLE	PASS	POS	QUAL	TOT	REFN	ALTN	FRAC	REF	ALT	EFF	IMPACT	AFF	MUT	ANN_TYPE
27064	p2_2_S2	2	6	9.68895e-15	35	34	1	2.94118	A	T	upstream_gene_variant	MODIFIER	MPN001	c.-686A>T	intergenic
27065	p2_2_S2	2	31	0	48	47	1	2.12766	T	A	upstream_gene_variant	MODIFIER	MPN001	c.-661T>A	intergenic
27066	p2_2_S2	2	71	1.42436e-15	65	64	1	1.5625	CGCG	TGCA	upstream_gene_variant	MODIFIER	MPN001	c.-621_-618delCGCGinsTGCA	intergenic
27067	p2_2_S2	2	87	0	73	72	1	1.38889	G	A	upstream_gene_variant	MODIFIER	MPN001	c.-605G>A	intergenic
27068	p2_2_S2	2	115	0	81	80	1	1.25	TTTGC	ATTGT	upstream_gene_variant	MODIFIER	MPN001	c.-577_-573delTTTGCinsATTGT	intergenic
27069	p2_2_S2	2	120	1.95102e-15	82	81	1	1.23457	CGTT	TGTA	upstream_gene_variant	MODIFIER	MPN001	c.-572_-569delCGTTinsTGTA	intergenic
27070	p2_2_S2	2	140	0	91	90	1	1.11111	T	C	upstream_gene_variant	MODIFIER	MPN001	c.-552T>C	intergenic
27071	p2_2_S2	2	143	0	104	103	1	0.970874	TCT	ACC	upstream_gene_variant	MODIFIER	MPN001	c.-549_-547delTCTinsACC	intergenic
27072	p2_2_S2	2	152	1.46203e-15	101	100	1	1	T	A	upstream_gene_variant	MODIFIER	MPN001	c.-540T>A	intergenic
27073	p2_2_S2	2	161	0	95	94	1	1.06383	A	T	upstream_gene_variant	MODIFIER	MPN001	c.-531A>T	intergenic
27074	p2_2_S2	2	185	2.5316e-15	97	95	2	2.10526	C	T	upstream_gene_variant	MODIFIER	MPN001	c.-507C>T	intergenic
27075	p2_2_S2	2	188	0	99	98	1	1.02041	A	T	upstream_gene_variant	MODIFIER	MPN001	c.-504A>T	intergenic
27076	p2_2_S2	2	202	0	100	95	5	5.26316	A	T	upstream_gene_variant	MODIFIER	MPN001	c.-490A>T	intergenic
27077	p2_2_S2	2	230	0	104	103	1	0.970874	T	A	upstream_gene_variant	MODIFIER	MPN001	c.-462T>A	intergenic
27078	p2_2_S2	2	234	5.72805e-16	103	102	1	0.980392	G	A	upstream_gene_variant	MODIFIER	MPN001	c.-458G>A	intergenic
27079	p2_2_S2	2	259	0	109	108	1	0.925926	T	C	upstream_gene_variant	MODIFIER	MPN001	c.-433T>C	intergenic
27080	p2_2_S2	2	261	1.30335e-15	110	109	1	0.917431	A	G	upstream_gene_variant	MODIFIER	MPN001	c.-431A>G	intergenic
27081	p2_2_S2	2	273	5.74076e-15	109	108	1	0.925926	TCTAT	ACTAC	upstream_gene_variant	MODIFIER	MPN001	c.-419_-415delTCTATinsACTAC	intergenic
27082	p2_2_S2	2	278	1.26269e-14	110	109	1	0.917431	AGT	GGC	upstream_gene_variant	MODIFIER	MPN001	c.-414_-412delAGTinsGGC	intergenic
27083	p2_2_S2	2	290	2.63919e-16	100	99	1	1.0101	ATATT	TTATA	upstream_gene_variant	MODIFIER	MPN001	c.-402_-398delATATTinsTTATA	intergenic
27084	p2_2_S2	2	313	0	95	94	1	1.06383	GGT	AGA	upstream_gene_variant	MODIFIER	MPN001	c.-379_-377delGGTinsAGA	intergenic
27085	p2_2_S2	2	327	0	89	88	1	1.13636	A	G	upstream_gene_variant	MODIFIER	MPN001	c.-365A>G	intergenic
27086	p2_2_S2	2	355	3.77444e-15	107	104	3	2.88462	AAGTGGTTAGT	GTGTCGCTAGT	upstream_gene_variant	MODIFIER	MPN001	c.-337_-331delAAGTGGTinsGTGTCGC	intergenic
27087	p2_2_S2	2	372	1.30335e-15	110	109	1	0.917431	A	G	upstream_gene_variant	MODIFIER	MPN001	c.-320A>G	intergenic
27088	p2_2_S2	2	382	6.50945e-15	107	106	1	0.943396	T	C	upstream_gene_variant	MODIFIER	MPN001	c.-310T>C	intergenic
27089	p2_2_S2	2	401	0	108	107	1	0.934579	TATT	AATA	upstream_gene_variant	MODIFIER	MPN001	c.-291_-288delTATTinsAATA	intergenic
27090	p2_2_S2	2	435	4.86684e-15	102	101	1	0.990099	A	T	upstream_gene_variant	MODIFIER	MPN001	c.-257A>T	intergenic
27091	p2_2_S2	2	447	0	107	106	1	0.943396	A	T	upstream_gene_variant	MODIFIER	MPN001	c.-245A>T	intergenic
27092	p2_2_S2	2	450	1.80835e-15	105	104	1	0.961538	CA	GT	upstream_gene_variant	MODIFIER	MPN001	c.-242_-241delCAinsGT	intergenic
27093	p2_2_S2	2	499	0	92	90	2	2.22222	T	A	upstream_gene_variant	MODIFIER	MPN001	c.-193T>A	intergenic
27094	p2_2_S2	2	506	5.16819e-15	84	83	1	1.20482	T	C	upstream_gene_variant	MODIFIER	MPN001	c.-186T>C	intergenic
27095	p2_2_S2	2	529	7.16442e-15	84	83	1	1.20482	A	G	upstream_gene_variant	MODIFIER	MPN001	c.-163A>G	intergenic
27096	p2_2_S2	2	566	0	85	84	1	1.19048	T	A	upstream_gene_variant	MODIFIER	MPN001	c.-126T>A	intergenic
27097	p2_2_S2	2	581	5.16819e-15	84	83	1	1.20482	T	A	upstream_gene_variant	MODIFIER	MPN001	c.-111T>A	intergenic
27098	p2_2_S2	2	585	1.75538e-15	83	82	1	1.21951	T	A	upstream_gene_variant	MODIFIER	MPN001	c.-107T>A	intergenic
27099	p2_2_S2	2	620	1.20541e-16	90	88	2	2.27273	GTG	ATA	upstream_gene_variant	MODIFIER	MPN001	c.-72_-70delGTGinsATA	intergenic
27100	p2_2_S2	2	633	0	95	94	1	1.06383	A	C	upstream_gene_variant	MODIFIER	MPN001	c.-59A>C	intergenic
27101	p2_2_S2	2	636	2.23778e-15	90	87	3	3.44828	CATAATAA	TATATTAA	upstream_gene_variant	MODIFIER	MPN001	c.-56_-52delCATAAinsTATAT	intergenic
27102	p2_2_S2	2	651	0	95	91	4	4.3956	C	T	upstream_gene_variant	MODIFIER	MPN001	c.-41C>T	intergenic
27103	p2_2_S2	2	655	0	90	89	1	1.1236	T	A	upstream_gene_variant	MODIFIER	MPN001	c.-37T>A	intergenic
27104	p2_2_S2	2	665	7.02174e-15	93	92	1	1.08696	A	C	upstream_gene_variant	MODIFIER	MPN001	c.-27A>C	intergenic
27105	p2_2_S2	2	674	0	90	86	4	4.65116	AAAAA	GAAAG	upstream_gene_variant	MODIFIER	MPN001	c.-18_-14delAAAAAinsGAAAG	intergenic
27106	p2_2_S2	2	682	3.37538e-15	88	87	1	1.14943	T	A	upstream_gene_variant	MODIFIER	MPN001	c.-10T>A	intergenic
27107	p2_2_S2	2	687	0	80	79	1	1.26582	AGGGC	TGGGT	upstream_gene_variant	MODIFIER	MPN001	c.-5_-1delAGGGCinsTGGGT	intergenic
27108	p2_2_S2	2	697	3.90275e-15	74	73	1	1.36986	A	T	missense_variant	MODERATE	MPN001	p.Lys2Asn	essential
27109	p2_2_S2	2	744	5.31157e-15	75	74	1	1.35135	A	T	missense_variant	MODERATE	MPN001	p.Asn18Ile	essential
27110	p2_2_S2	2	768	0	80	79	1	1.26582	AGAT	GGAC	missense_variant	MODERATE	MPN001	p.LysMet26ArgThr	essential
27111	p2_2_S2	2	847	0	75	74	1	1.35135	TTCTG	CTCTA	missense_variant	MODERATE	MPN001	p.Ala54Thr	essential
27112	p2_2_S2	2	856	0	75	74	1	1.35135	A	G	synonymous_variant	LOW	MPN001	p.Lys55Lys	essential
27113	p2_2_S2	2	926	0	61	59	2	3.38983	G	A	missense_variant	MODERATE	MPN001	p.Glu79Lys	essential
27114	p2_2_S2	2	942	2.71688e-16	69	68	1	1.47059	T	A	missense_variant	MODERATE	MPN001	p.Ile84Asn	essential
27115	p2_2_S2	2	980	1.20541e-16	78	77	1	1.2987	A	T	missense_variant	MODERATE	MPN001	p.Thr97Ser	essential
27116	p2_2_S2	2	996	7.3231e-15	75	74	1	1.35135	CAAAAAAAACAAACATT	CAAAAAAAAACAAACATT	frameshift_variant	HIGH	MPN001	p.Thr105fs	essential
27117	p2_2_S2	2	1024	0	90	89	1	1.1236	G	T	synonymous_variant	LOW	MPN001	p.Thr111Thr	essential
27118	p2_2_S2	2	1029	7.16442e-15	84	83	1	1.20482	A	T	missense_variant	MODERATE	MPN001	p.Asp113Val	essential
27119	p2_2_S2	2	1055	0	93	92	1	1.08696	TTCAAC	CTCTAT	missense_variant	MODERATE	MPN001	p.PheAsn122LeuTyr	essential
27120	p2_2_S2	2	1078	0	94	93	1	1.07527	G	C	missense_variant	MODERATE	MPN001	p.Lys129Asn	essential
27121	p2_2_S2	2	1102	5.00998e-15	93	92	1	1.08696	A	G	synonymous_variant	LOW	MPN001	p.Gln137Gln	essential
27122	p2_2_S2	2	1103	1.81047e-16	91	90	1	1.11111	C	T	missense_variant	MODERATE	MPN001	p.His138Tyr	essential
27123	p2_2_S2	2	1109	1.62754e-15	92	91	1	1.0989	C	G	missense_variant	MODERATE	MPN001	p.Leu140Val	essential
27124	p2_2_S2	2	1130	5.65059e-15	79	78	1	1.28205	AAGAT	TAGAC	stop_gained	HIGH	MPN001	p.LysIle147*	essential
27125	p2_2_S2	2	1139	1.66521e-15	80	79	1	1.26582	CAT	GAA	missense_variant	MODERATE	MPN001	p.His150Glu	essential
27126	p2_2_S2	2	1158	0	73	72	1	1.38889	G	A	missense_variant	MODERATE	MPN001	p.Arg156Lys	essential
27127	p2_2_S2	2	1175	0	64	63	1	1.5873	TTC	CTG	missense_variant	MODERATE	MPN001	p.Phe162Leu	essential
27128	p2_2_S2	2	1198	0	66	65	1	1.53846	T	A	synonymous_variant	LOW	MPN001	p.Gly169Gly	essential
27129	p2_2_S2	2	1211	0	68	67	1	1.49254	C	A	missense_variant	MODERATE	MPN001	p.Gln174Lys	essential
27130	p2_2_S2	2	1240	0	85	84	1	1.19048	T	A	stop_gained	HIGH	MPN001	p.Tyr183*	essential
27131	p2_2_S2	2	1269	1.51453e-15	71	70	1	1.42857	AAACCGA	GATCCGT	missense_variant	MODERATE	MPN001	p.LysThrAsp193ArgSerVal	essential
27132	p2_2_S2	2	1302	0	75	74	1	1.35135	A	T	missense_variant	MODERATE	MPN001	p.Asn204Ile	essential
27133	p2_2_S2	2	1343	0	66	65	1	1.53846	G	A	missense_variant	MODERATE	MPN001	p.Asp218Asn	essential
27134	p2_2_S2	2	1356	0	66	64	2	3.125	T	A	missense_variant	MODERATE	MPN001	p.Ile222Asn	essential
27135	p2_2_S2	2	1375	3.88768e-15	74	73	1	1.36986	C	T	synonymous_variant	LOW	MPN001	p.His228His	essential
27136	p2_2_S2	2	1379	0	73	72	1	1.38889	G	C	missense_variant	MODERATE	MPN001	p.Asp230His	essential
27137	p2_2_S2	2	1386	5.84647e-15	73	70	3	4.28571	T	A	stop_gained	HIGH	MPN001	p.Leu232*	essential
27138	p2_2_S2	2	1400	5.44718e-15	66	65	1	1.53846	C	A	missense_variant	MODERATE	MPN001	p.Leu237Met	essential
27139	p2_2_S2	2	1418	5.49992e-15	74	73	1	1.36986	TTCTT	ATCTA	stop_gained	HIGH	MPN001	p.PheLeu243*	essential
27140	p2_2_S2	2	1430	0	74	73	1	1.36986	TACACCTCAATTAAC	AACATCTTAATAAAT	missense_variant	MODERATE	MPN001	p.TyrThrSer247AsnIleLeu	essential
27141	p2_2_S2	2	1445	1.17831e-14	80	79	1	1.26582	GAA	AAT	missense_variant	MODERATE	MPN001	p.Glu252Asn	essential
27142	p2_2_S2	2	1478	6.04235e-15	92	90	2	2.22222	TTT	ATA	missense_variant	MODERATE	MPN001	p.Phe263Ile	essential
27143	p2_2_S2	2	1510	0	92	90	2	2.22222	AAACG	TAATG	missense_variant	MODERATE	MPN001	p.Lys273Asn	essential
27144	p2_2_S2	2	1518	0	98	97	1	1.03093	T	C	missense_variant	MODERATE	MPN001	p.Leu276Pro	essential
27145	p2_2_S2	2	1532	0	96	95	1	1.05263	C	T	stop_gained	HIGH	MPN001	p.Gln281*	essential
27146	p2_2_S2	2	1544	0	96	95	1	1.05263	A	G	missense_variant	MODERATE	MPN001	p.Thr285Ala	essential
27147	p2_2_S2	2	1547	0	95	94	1	1.06383	T	C	synonymous_variant	LOW	MPN001	p.Leu286Leu	essential
27148	p2_2_S2	2	1572	0	89	87	2	2.29885	TCTGT	ACAGT	missense_variant	MODERATE	MPN001	p.LeuCys294HisSer	essential
27149	p2_2_S2	2	1577	3.46791e-16	82	81	1	1.23457	G	A	missense_variant	MODERATE	MPN001	p.Asp296Asn	essential
27150	p2_2_S2	2	1598	0	93	92	1	1.08696	C	T	missense_variant	MODERATE	MPN001	p.His303Tyr	essential
27151	p2_2_S2	2	1605	0	89	88	1	1.13636	AAA	TAT	missense_variant	MODERATE	MPN001	p.LysIle305IlePhe	essential
27152	p2_2_S2	2	1631	0	82	81	1	1.23457	G	A	missense_variant	MODERATE	MPN001	p.Gly314Ser	essential
27153	p2_2_S2	2	1642	2.63707e-15	81	80	1	1.25	A	C	missense_variant	MODERATE	MPN001	p.Leu317Phe	essential
27154	p2_2_S2	2	1685	1.01753e-15	76	75	1	1.33333	A	C	missense_variant	MODERATE	MPN001	p.Ile332Leu	essential
27155	p2_2_S2	2	1696	1.81565e-15	63	62	1	1.6129	TGCGCTT	AGCCCTA	missense_variant	MODERATE	MPN001	p.Asn335Lys	essential
27156	p2_2_S2	2	1722	1.74784e-15	83	82	1	1.21951	A	G	missense_variant	MODERATE	MPN001	p.Asp344Gly	essential
27157	p2_2_S2	2	1733	0	88	86	2	2.32558	A	G	missense_variant	MODERATE	MPN001	p.Thr348Ala	essential
27158	p2_2_S2	2	1737	1.20541e-16	78	77	1	1.2987	A	G	missense_variant	MODERATE	MPN001	p.Asp349Gly	essential
27159	p2_2_S2	2	1756	5.16819e-15	84	83	1	1.20482	C	T	synonymous_variant	LOW	MPN001	p.Phe355Phe	essential
27160	p2_2_S2	2	1839	0	90	89	1	1.1236	T	G	start_lost	HIGH	MPN002	p.Met1?	gene
27161	p2_2_S2	2	1841	3.39257e-16	82	81	1	1.23457	A	T	missense_variant	MODERATE	MPN002	p.Thr2Ser	gene
27162	p2_2_S2	2	1848	0	90	89	1	1.1236	A	T	missense_variant	MODERATE	MPN002	p.Tyr4Phe	gene
27163	p2_2_S2	2	1862	3.39045e-15	88	87	1	1.14943	C	T	synonymous_variant	LOW	MPN002	p.Leu9Leu	gene
27164	p2_2_S2	2	1877	8.96759e-16	92	90	2	2.22222	A	C	missense_variant	MODERATE	MPN002	p.Thr14Pro	gene
27165	p2_2_S2	2	1882	0	93	91	2	2.1978	A	C	synonymous_variant	LOW	MPN002	p.Leu15Leu	gene
27166	p2_2_S2	2	1905	3.72947e-15	92	91	1	1.0989	AA	TG	missense_variant	MODERATE	MPN002	p.Lys23Met	gene
27167	p2_2_S2	2	1909	0	89	87	2	2.29885	CTT	TTA	stop_gained	HIGH	MPN002	p.Leu25*	gene
27168	p2_2_S2	2	1926	0	85	84	1	1.19048	A	G	missense_variant	MODERATE	MPN002	p.His30Arg	gene
27169	p2_2_S2	2	1964	1.97409e-15	87	86	1	1.16279	A	T	stop_gained	HIGH	MPN002	p.Lys43*	gene
27170	p2_2_S2	2	2017	0	77	76	1	1.31579	T	C	synonymous_variant	LOW	MPN002	p.Tyr60Tyr	gene
27171	p2_2_S2	2	2018	2.64484e-15	81	80	1	1.25	G	A	missense_variant	MODERATE	MPN002	p.Asp61Asn	gene
27172	p2_2_S2	2	2067	0	86	85	1	1.17647	A	T	missense_variant	MODERATE	MPN002	p.Asp77Val	gene
27173	p2_2_S2	2	2085	1.20541e-16	78	77	1	1.2987	A	G	missense_variant	MODERATE	MPN002	p.His83Arg	gene
27174	p2_2_S2	2	2156	0	95	94	1	1.06383	A	C	missense_variant	MODERATE	MPN002	p.Thr107Pro	gene
27175	p2_2_S2	2	2193	1.66168e-15	75	74	1	1.35135	TTTTA	CTTTT	missense_variant	MODERATE	MPN002	p.PheLeu119SerPhe	gene
27176	p2_2_S2	2	2216	6.72039e-15	76	75	1	1.33333	GCCTTTTACCA	ACTCTTCACTG	missense_variant	MODERATE	MPN002	p.AlaPheTyrGln127ThrLeuHisTrp	gene
27177	p2_2_S2	2	2240	0	81	80	1	1.25	GGC	CGA	missense_variant	MODERATE	MPN002	p.Gly135Arg	gene
27178	p2_2_S2	2	2277	0	88	87	1	1.14943	GACGT	AACGC	missense_variant	MODERATE	MPN002	p.Arg147Lys	gene
27179	p2_2_S2	2	2291	0	105	104	1	0.961538	AAGCA	GAGCT	missense_variant	MODERATE	MPN002	p.LysGln152GluLeu	gene
27180	p2_2_S2	2	2296	4.88238e-15	102	101	1	0.990099	A	G	synonymous_variant	LOW	MPN002	p.Gln153Gln	gene
27181	p2_2_S2	2	2313	0	93	92	1	1.08696	AGAAG	TGAAC	missense_variant	MODERATE	MPN002	p.LysLys159MetAsn	gene
27182	p2_2_S2	2	2318	0	91	90	1	1.11111	C	T	missense_variant	MODERATE	MPN002	p.Leu161Phe	gene
27183	p2_2_S2	2	2330	1.97409e-15	87	86	1	1.16279	T	C	synonymous_variant	LOW	MPN002	p.Leu165Leu	gene
27184	p2_2_S2	2	2333	3.14207e-15	94	93	1	1.07527	AAA	GAG	missense_variant	MODERATE	MPN002	p.Lys166Glu	gene
27185	p2_2_S2	2	2356	0	85	84	1	1.19048	T	A	synonymous_variant	LOW	MPN002	p.Gly173Gly	gene
27186	p2_2_S2	2	2360	0	94	93	1	1.07527	T	C	synonymous_variant	LOW	MPN002	p.Leu175Leu	gene
27187	p2_2_S2	2	2376	0	95	94	1	1.06383	A	T	missense_variant	MODERATE	MPN002	p.Tyr180Phe	gene
27188	p2_2_S2	2	2382	2.50546e-15	90	89	1	1.1236	A	G	missense_variant	MODERATE	MPN002	p.Asn182Ser	gene
27189	p2_2_S2	2	2422	1.04014e-15	83	81	2	2.46914	T	G	synonymous_variant	LOW	MPN002	p.Arg195Arg	gene
27190	p2_2_S2	2	2436	0	84	82	2	2.43902	T	C	missense_variant	MODERATE	MPN002	p.Val200Ala	gene
27191	p2_2_S2	2	2447	2.5469e-15	78	77	1	1.2987	TTAAA	CTAAT	missense_variant	MODERATE	MPN002	p.Lys205Met	gene
27192	p2_2_S2	2	2460	0	80	79	1	1.26582	T	C	missense_variant	MODERATE	MPN002	p.Val208Ala	gene
27193	p2_2_S2	2	2469	3.06061e-17	83	82	1	1.21951	ATAACT	TAGACC	missense_variant	MODERATE	MPN002	p.AsnAsnTyr211IleAspHis	gene
27194	p2_2_S2	2	2501	3.43565e-15	70	68	2	2.94118	AACAAGAACTA	TACATGAACTA	missense_variant	MODERATE	MPN002	p.AsnLys222TyrMet	gene
27195	p2_2_S2	2	2545	0	82	81	1	1.23457	TGAGG	AGAGA	missense_variant	MODERATE	MPN002	p.Val238Met	gene
27196	p2_2_S2	2	2558	1.75538e-15	78	77	1	1.2987	TTCT	CTCA	missense_variant	MODERATE	MPN002	p.PhePhe241LeuIle	gene
27197	p2_2_S2	2	2620	0	87	85	2	2.35294	TGTCGACAAAA	CGTCAACAGAG	missense_variant	MODERATE	MPN002	p.AspLysIle263AsnArgVal	gene
27198	p2_2_S2	2	2659	0	90	89	1	1.1236	T	C	synonymous_variant	LOW	MPN002	p.Ser274Ser	gene
27199	p2_2_S2	2	2674	0	100	99	1	1.0101	C	G	missense_variant	MODERATE	MPN002	p.Asp279Glu	gene
27200	p2_2_S2	2	2684	0	92	90	2	2.22222	T	A	missense_variant	MODERATE	MPN002	p.Leu283Met	gene
27201	p2_2_S2	2	2699	0	90	89	1	1.1236	C	G	missense_variant	MODERATE	MPN002	p.Pro288Ala	gene
27202	p2_2_S2	2	2710	0	94	93	1	1.07527	A	G	synonymous_variant	LOW	MPN002	p.Lys291Lys	gene
27203	p2_2_S2	2	2724	7.00668e-15	93	92	1	1.08696	A	G	missense_variant	MODERATE	MPN002	p.Asn296Ser	gene
27204	p2_2_S2	2	2798	6.93887e-15	80	79	1	1.26582	T	C	upstream_gene_variant	MODIFIER	Gene_2799_2799	n.-1T>C	intergenic
27205	p2_2_S2	2	2804	7.15712e-15	84	83	1	1.20482	T	C	upstream_gene_variant	MODIFIER	MPN003	c.-65T>C	intergenic
27206	p2_2_S2	2	2813	0	85	83	2	2.40964	AAT	GAA	upstream_gene_variant	MODIFIER	MPN003	c.-56_-54delAATinsGAA	intergenic
27207	p2_2_S2	2	2818	0	81	80	1	1.25	TGCT	AGT	upstream_gene_variant	MODIFIER	MPN003	c.-51_-48delTGCTinsAGT	intergenic
27208	p2_2_S2	2	2841	0	75	74	1	1.35135	A	T	upstream_gene_variant	MODIFIER	MPN003	c.-28A>T	intergenic
27209	p2_2_S2	2	2849	3.53736e-15	79	78	1	1.28205	A	C	upstream_gene_variant	MODIFIER	MPN003	c.-20A>C	intergenic
27210	p2_2_S2	2	2861	1.81047e-16	66	65	1	1.53846	ACA	TCT	upstream_gene_variant	MODIFIER	MPN003	c.-8_-6delACAinsTCT	intergenic
27211	p2_2_S2	2	2866	3.18727e-15	61	60	1	1.66667	TAAA	CAAG	initiator_codon_variant	LOW	MPN003	p.Met1?	gene
27212	p2_2_S2	2	2877	2.0492e-15	65	64	1	1.5625	C	A	missense_variant	MODERATE	MPN003	p.Asp3Glu	gene
27213	p2_2_S2	2	2890	7.45871e-15	66	65	1	1.53846	C	T	stop_gained	HIGH	MPN003	p.Gln8*	gene
27214	p2_2_S2	2	2907	3.68403e-15	70	69	1	1.44928	T	C	synonymous_variant	LOW	MPN003	p.Ser13Ser	gene
27215	p2_2_S2	2	2922	2.0492e-15	74	73	1	1.36986	TGAAGGC	AGAGGGT	synonymous_variant	LOW	MPN003	p.21	gene
27216	p2_2_S2	2	2935	0	80	79	1	1.26582	GCCG	CCCA	missense_variant	MODERATE	MPN003	p.AlaVal23ProMet	gene
27217	p2_2_S2	2	2954	0	82	80	2	2.5	G	A	missense_variant	MODERATE	MPN003	p.Gly29Asp	gene
27218	p2_2_S2	2	2997	2.72747e-15	88	86	2	2.32558	GATCT	AGTCA	missense_variant	MODERATE	MPN003	p.MetIleTrp43IleValArg	gene
27219	p2_2_S2	2	3025	0	86	85	1	1.17647	G	A	missense_variant	MODERATE	MPN003	p.Asp53Asn	gene
27220	p2_2_S2	2	3070	4.75101e-16	100	99	1	1.0101	AAA	TAT	missense_variant	MODERATE	MPN003	p.Lys68Tyr	gene
27221	p2_2_S2	2	3086	0	95	94	1	1.06383	C	T	missense_variant	MODERATE	MPN003	p.Thr73Ile	gene
27222	p2_2_S2	2	3124	5.37914e-15	88	87	1	1.14943	A	C	missense_variant	MODERATE	MPN003	p.Ile86Leu	gene
27223	p2_2_S2	2	3148	1.96114e-16	91	90	1	1.11111	A	C	missense_variant	MODERATE	MPN003	p.Thr94Pro	gene
27224	p2_2_S2	2	3153	0	94	93	1	1.07527	TGAAA	CGAAT	missense_variant	MODERATE	MPN003	p.Thr97Ser	gene
27225	p2_2_S2	2	3165	0	104	103	1	0.970874	T	A	missense_variant	MODERATE	MPN003	p.Phe99Leu	gene
27226	p2_2_S2	2	3203	0	100	99	1	1.0101	G	A	missense_variant	MODERATE	MPN003	p.Ser112Asn	gene
27227	p2_2_S2	2	3204	0	98	97	1	1.03093	C	G	missense_variant	MODERATE	MPN003	p.Ser112Arg	gene
27228	p2_2_S2	2	3246	0	90	89	1	1.1236	T	A	synonymous_variant	LOW	MPN003	p.Val126Val	gene
27229	p2_2_S2	2	3250	0	88	87	1	1.14943	AATG	TGTA	missense_variant	MODERATE	MPN003	p.AsnAla128CysThr	gene
27230	p2_2_S2	2	3265	5.37161e-15	88	87	1	1.14943	T	A	missense_variant	MODERATE	MPN003	p.Ser133Thr	gene
27231	p2_2_S2	2	3301	3.23224e-15	97	96	1	1.04167	T	A	missense_variant	MODERATE	MPN003	p.Tyr145Asn	gene
27232	p2_2_S2	2	3326	6.77289e-15	98	96	2	2.08333	GGG	AGA	missense_variant	MODERATE	MPN003	p.GlyGlu153GluLys	gene
27233	p2_2_S2	2	3329	3.47309e-15	101	100	1	1	A	G	missense_variant	MODERATE	MPN003	p.Glu154Gly	gene
27234	p2_2_S2	2	3338	0	106	105	1	0.952381	GTG	ATA	missense_variant	MODERATE	MPN003	p.GlyAsp157AspAsn	gene
27235	p2_2_S2	2	3356	0	99	98	1	1.02041	G	A	missense_variant	MODERATE	MPN003	p.Gly163Asp	gene
27236	p2_2_S2	2	3357	0	102	100	2	2	T	A	synonymous_variant	LOW	MPN003	p.Gly163Gly	gene
27237	p2_2_S2	2	3361	0	105	104	1	0.961538	T	G	missense_variant	MODERATE	MPN003	p.Cys165Gly	gene
27238	p2_2_S2	2	3363	4.14407e-15	102	100	2	2	T	G	missense_variant	MODERATE	MPN003	p.Cys165Trp	gene
27239	p2_2_S2	2	3365	0	99	98	1	1.02041	A	G	missense_variant	MODERATE	MPN003	p.Asp166Gly	gene
27240	p2_2_S2	2	3366	0	94	93	1	1.07527	CAAGGAAC	TAACGAAG	missense_variant	MODERATE	MPN003	p.LysGluHis167AsnGluAsp	gene
27241	p2_2_S2	2	3380	3.23224e-15	97	96	1	1.04167	C	G	missense_variant	MODERATE	MPN003	p.Thr171Ser	gene
27242	p2_2_S2	2	3381	3.61646e-15	92	91	1	1.0989	C	T	synonymous_variant	LOW	MPN003	p.Thr171Thr	gene
27243	p2_2_S2	2	3423	4.02305e-15	111	109	2	1.83486	T	C	synonymous_variant	LOW	MPN003	p.Ser185Ser	gene
27244	p2_2_S2	2	3428	1.30335e-15	110	109	1	0.917431	A	G	missense_variant	MODERATE	MPN003	p.Tyr187Cys	gene
27245	p2_2_S2	2	3430	0	109	108	1	0.925926	A	G	missense_variant	MODERATE	MPN003	p.Lys188Glu	gene
27246	p2_2_S2	2	3435	0	114	113	1	0.884956	A	T	missense_variant	MODERATE	MPN003	p.Gln189His	gene
27247	p2_2_S2	2	3450	0	108	106	2	1.88679	T	A	missense_variant	MODERATE	MPN003	p.Ser194Arg	gene
27248	p2_2_S2	2	3451	0	108	107	1	0.934579	A	G	missense_variant	MODERATE	MPN003	p.Arg195Gly	gene
27249	p2_2_S2	2	3505	0	94	93	1	1.07527	G	A	missense_variant	MODERATE	MPN003	p.Glu213Lys	gene
27250	p2_2_S2	2	3507	5.37161e-15	97	96	1	1.04167	ACG	TCA	missense_variant	MODERATE	MPN003	p.GluArg213AspHis	gene
27251	p2_2_S2	2	3521	6.62975e-15	95	94	1	1.06383	CGCAA	TGCAT	missense_variant	MODERATE	MPN003	p.ProGln218LeuHis	gene
27252	p2_2_S2	2	3541	0	86	85	1	1.17647	T	C	missense_variant	MODERATE	MPN003	p.Tyr225His	gene
27253	p2_2_S2	2	3549	6.94641e-15	80	79	1	1.26582	T	G	synonymous_variant	LOW	MPN003	p.Gly227Gly	gene
27254	p2_2_S2	2	3599	6.93887e-15	80	79	1	1.26582	T	C	missense_variant	MODERATE	MPN003	p.Phe244Ser	gene
27255	p2_2_S2	2	3625	0	86	85	1	1.17647	ACC	TCT	missense_variant	MODERATE	MPN003	p.Thr253Ser	gene
27256	p2_2_S2	2	3656	0	89	88	1	1.13636	AGAGCTACA	TGTGCTTCT	missense_variant	MODERATE	MPN003	p.GluSerTyrThr263ValCysPheSer	gene
27257	p2_2_S2	2	3703	2.49769e-15	90	89	1	1.1236	T	A	missense_variant	MODERATE	MPN003	p.Tyr279Asn	gene
27258	p2_2_S2	2	3704	1.81047e-16	91	90	1	1.11111	A	T	missense_variant	MODERATE	MPN003	p.Tyr279Phe	gene
27259	p2_2_S2	2	3799	0	65	64	1	1.5625	AACC	TACT	missense_variant	MODERATE	MPN003	p.AsnArg311TyrCys	gene
27260	p2_2_S2	2	3826	6.52428e-15	62	60	2	3.33333	T	A	missense_variant	MODERATE	MPN003	p.Leu320Ile	gene
27261	p2_2_S2	2	3840	0	58	57	1	1.75439	T	A	missense_variant	MODERATE	MPN003	p.Asp324Glu	gene
27262	p2_2_S2	2	3895	2.41129e-15	60	59	1	1.69492	A	T	stop_gained	HIGH	MPN003	p.Lys343*	gene
27263	p2_2_S2	2	3925	6.48614e-16	64	63	1	1.5873	A	G	missense_variant	MODERATE	MPN003	p.Thr353Ala	gene
27264	p2_2_S2	2	3946	0	76	75	1	1.33333	A	C	missense_variant	MODERATE	MPN003	p.Thr360Pro	gene
27265	p2_2_S2	2	3976	1.74055e-15	83	82	1	1.21951	G	A	missense_variant	MODERATE	MPN003	p.Val370Ile	gene
27266	p2_2_S2	2	3989	0	88	87	1	1.14943	TTG	ATA	missense_variant	MODERATE	MPN003	p.PheGlu374TyrLys	gene
27267	p2_2_S2	2	4004	1.75538e-15	83	82	1	1.21951	T	C	missense_variant	MODERATE	MPN003	p.Leu379Ser	gene
27268	p2_2_S2	2	4010	1.74055e-15	83	82	1	1.21951	A	G	missense_variant	MODERATE	MPN003	p.Asn381Ser	gene
27269	p2_2_S2	2	4024	0	86	85	1	1.17647	A	C	missense_variant	MODERATE	MPN003	p.Asn386His	gene
27270	p2_2_S2	2	4026	0	84	83	1	1.20482	CGCC	TGCT	synonymous_variant	LOW	MPN003	p.388	gene
27271	p2_2_S2	2	4046	1.82342e-15	96	95	1	1.05263	T	C	missense_variant	MODERATE	MPN003	p.Leu393Pro	gene
27272	p2_2_S2	2	4055	7.02904e-15	93	92	1	1.08696	A	T	missense_variant	MODERATE	MPN003	p.Gln396Leu	gene
27273	p2_2_S2	2	4062	7.17995e-15	84	83	1	1.20482	A	G	synonymous_variant	LOW	MPN003	p.Ala398Ala	gene
27274	p2_2_S2	2	4085	7.62492e-15	90	87	3	3.44828	GGGAA	AGGAT	missense_variant	MODERATE	MPN003	p.ArgGlu406GlnAsp	gene
27275	p2_2_S2	2	4098	2.117e-15	78	77	1	1.2987	C	G	synonymous_variant	LOW	MPN003	p.Arg410Arg	gene
27276	p2_2_S2	2	4099	0	76	75	1	1.33333	A	T	missense_variant	MODERATE	MPN003	p.Arg411Trp	gene
27277	p2_2_S2	2	4106	7.30756e-15	75	74	1	1.35135	C	G	missense_variant	MODERATE	MPN003	p.Ser413Cys	gene
27278	p2_2_S2	2	4119	5.66542e-15	70	69	1	1.44928	T	G	missense_variant	MODERATE	MPN003	p.Ser417Arg	gene
27279	p2_2_S2	2	4134	1.37115e-15	68	66	2	3.0303	T	A	synonymous_variant	LOW	MPN003	p.Gly422Gly	gene
27280	p2_2_S2	2	4137	0	77	76	1	1.31579	G	A	synonymous_variant	LOW	MPN003	p.Lys423Lys	gene
27281	p2_2_S2	2	4158	1.20541e-16	78	77	1	1.2987	T	C	synonymous_variant	LOW	MPN003	p.Arg430Arg	gene
27282	p2_2_S2	2	4180	3.65413e-15	86	85	1	1.17647	TACAT	AACAA	missense_variant	MODERATE	MPN003	p.TyrIle438AsnAsn	gene
27283	p2_2_S2	2	4211	0	84	83	1	1.20482	C	T	missense_variant	MODERATE	MPN003	p.Thr448Met	gene
27284	p2_2_S2	2	4268	5.37914e-15	88	87	1	1.14943	T	G	missense_variant	MODERATE	MPN003	p.Ile467Ser	gene
27285	p2_2_S2	2	4280	3.87238e-15	83	82	1	1.21951	AAA	GAG	missense_variant	MODERATE	MPN003	p.GluLys471GlyGlu	gene
27286	p2_2_S2	2	4289	0	86	84	2	2.38095	A	C	missense_variant	MODERATE	MPN003	p.His474Pro	gene
27287	p2_2_S2	2	4301	3.29251e-15	85	84	1	1.19048	TCTTT	ACTTA	missense_variant	MODERATE	MPN003	p.IlePhe478AsnLeu	gene
27288	p2_2_S2	2	4328	3.13406e-15	76	75	1	1.33333	TAGTC	AAGTT	stop_gained	HIGH	MPN003	p.Leu487*	gene
27289	p2_2_S2	2	4341	0	80	79	1	1.26582	T	C	synonymous_variant	LOW	MPN003	p.Val491Val	gene
27290	p2_2_S2	2	4345	7.3231e-15	75	74	1	1.35135	T	C	missense_variant	MODERATE	MPN003	p.Cys493Arg	gene
27291	p2_2_S2	2	4355	3.52982e-15	79	78	1	1.28205	A	G	missense_variant	MODERATE	MPN003	p.Lys496Arg	gene
27292	p2_2_S2	2	4377	3.75207e-15	83	82	1	1.21951	A	T	missense_variant	MODERATE	MPN003	p.Lys503Asn	gene
27293	p2_2_S2	2	4388	0	83	81	2	2.46914	ACAAGAT	GCAGGAT	missense_variant	MODERATE	MPN003	p.AsnLys507SerArg	gene
27294	p2_2_S2	2	4450	3.53736e-15	79	78	1	1.28205	A	G	missense_variant	MODERATE	MPN003	p.Thr528Ala	gene
27295	p2_2_S2	2	4455	0	77	76	1	1.31579	CTT	TTC	missense_variant	MODERATE	MPN003	p.Phe530Ser	gene
27296	p2_2_S2	2	4460	1.0698e-15	77	75	2	2.66667	TTCGCT	ATCACT	missense_variant	MODERATE	MPN003	p.PheArg531TyrHis	gene
27297	p2_2_S2	2	4516	0	73	72	1	1.38889	CTGT	GTGA	missense_variant	MODERATE	MPN003	p.LeuTyr550ValAsn	gene
27298	p2_2_S2	2	4537	3.52982e-15	79	78	1	1.28205	A	G	missense_variant	MODERATE	MPN003	p.Asn557Asp	gene
27299	p2_2_S2	2	4558	0	86	85	1	1.17647	A	T	missense_variant	MODERATE	MPN003	p.Thr564Ser	gene
27300	p2_2_S2	2	4563	0	86	85	1	1.17647	T	A	missense_variant	MODERATE	MPN003	p.Asp565Glu	gene
27301	p2_2_S2	2	4575	1.81047e-16	91	90	1	1.11111	G	A	synonymous_variant	LOW	MPN003	p.Glu569Glu	gene
27302	p2_2_S2	2	4579	0	85	84	1	1.19048	T	G	missense_variant	MODERATE	MPN003	p.Trp571Gly	gene
27303	p2_2_S2	2	4583	2.63707e-15	81	80	1	1.25	A	G	missense_variant	MODERATE	MPN003	p.Lys572Arg	gene
27304	p2_2_S2	2	4621	8.70626e-16	85	84	1	1.19048	T	C	missense_variant	MODERATE	MPN003	p.Tyr585His	gene
27305	p2_2_S2	2	4623	7.17195e-15	84	83	1	1.20482	C	A	stop_gained	HIGH	MPN003	p.Tyr585*	gene
27306	p2_2_S2	2	4668	0	84	83	1	1.20482	G	A	synonymous_variant	LOW	MPN003	p.Thr600Thr	gene
27307	p2_2_S2	2	4687	0	81	79	2	2.53165	A	G	missense_variant	MODERATE	MPN003	p.Thr607Ala	gene
27308	p2_2_S2	2	4696	5.54488e-15	79	78	1	1.28205	A	G	missense_variant	MODERATE	MPN003	p.Lys610Glu	gene
27309	p2_2_S2	2	4698	0	81	80	1	1.25	G	C	missense_variant	MODERATE	MPN003	p.Lys610Asn	gene
27310	p2_2_S2	2	4730	4.22129e-16	60	59	1	1.69492	A	C	missense_variant	MODERATE	MPN003	p.Lys621Thr	gene
27311	p2_2_S2	2	4735	1.42436e-15	65	64	1	1.5625	TTCT	CTCA	missense_variant	MODERATE	MPN003	p.PheSer623LeuThr	gene
27312	p2_2_S2	2	4770	0	68	66	2	3.0303	A	G	synonymous_variant	LOW	MPN003	p.Arg634Arg	gene
27313	p2_2_S2	2	4804	0	77	76	1	1.31579	A	T	stop_gained	HIGH	MPN003	p.Lys646*	gene
27314	p2_2_S2	2	4808	3.06061e-17	75	74	1	1.35135	ACATT	GCATG	missense_variant	MODERATE	MPN003	p.AsnIle647SerMet	gene
27315	p2_2_S2	2	4823	7.45094e-15	66	65	1	1.53846	G	A	initiator_codon_variant	LOW	MPN004	p.Met1?	gene
27316	p2_2_S2	2	4829	4.2041e-15	56	55	1	1.81818	G	A	synonymous_variant	LOW	MPN004	p.Lys3Lys	gene
27317	p2_2_S2	2	4863	0	64	63	1	1.5873	T	A	missense_variant	MODERATE	MPN004	p.Leu15Ile	gene
27318	p2_2_S2	2	4865	0	68	67	1	1.49254	A	G	synonymous_variant	LOW	MPN004	p.Leu15Leu	gene
27319	p2_2_S2	2	4879	0	68	67	1	1.49254	T	A	missense_variant	MODERATE	MPN004	p.Ile20Asn	gene
27320	p2_2_S2	2	4888	0	77	76	1	1.31579	TC	CT	missense_variant	MODERATE	MPN004	p.Ile23Thr	gene
27321	p2_2_S2	2	4905	0	81	80	1	1.25	CTAG	GTGA	missense_variant	MODERATE	MPN004	p.LeuGlu29ValLys	gene
27322	p2_2_S2	2	4926	0	80	78	2	2.5641	T	A	missense_variant	MODERATE	MPN004	p.Tyr36Asn	gene
27323	p2_2_S2	2	4948	0	77	75	2	2.66667	CTCG	GTCC	missense_variant	MODERATE	MPN004	p.AlaArg43GlyPro	gene
27324	p2_2_S2	2	4978	0	77	76	1	1.31579	TTAAA	CTAAC	missense_variant	MODERATE	MPN004	p.LeuLys53ProAsn	gene
27325	p2_2_S2	2	4992	1.92136e-15	69	68	1	1.47059	CGCC	TGCT	missense_variant	MODERATE	MPN004	p.ArgArg58CysCys	gene
27326	p2_2_S2	2	5021	0	80	79	1	1.26582	G	T	synonymous_variant	LOW	MPN004	p.Gly67Gly	gene
27327	p2_2_S2	2	5030	0	80	79	1	1.26582	CCACG	TCACA	missense_variant	MODERATE	MPN004	p.Asp72Asn	gene
27328	p2_2_S2	2	5037	5.86201e-15	82	81	1	1.23457	CGC	TGT	missense_variant	MODERATE	MPN004	p.Arg73Cys	gene
27329	p2_2_S2	2	5048	2.43012e-15	77	76	1	1.31579	AA	TG	missense_variant	MODERATE	MPN004	p.LysLys76AsnGlu	gene
27330	p2_2_S2	2	5074	0	78	76	2	2.63158	T	A	missense_variant	MODERATE	MPN004	p.Val85Glu	gene
27331	p2_2_S2	2	5097	0	83	82	1	1.21951	GGG	AGA	missense_variant	MODERATE	MPN004	p.Gly93Arg	gene
27332	p2_2_S2	2	5100	0	85	82	3	3.65854	GACAT	AACAA	missense_variant	MODERATE	MPN004	p.AspMet94AsnLys	gene
27333	p2_2_S2	2	5128	7.16442e-15	84	83	1	1.20482	G	A	missense_variant	MODERATE	MPN004	p.Arg103Gln	gene
27334	p2_2_S2	2	5133	0	93	92	1	1.08696	GCGCA	ACTCT	missense_variant	MODERATE	MPN004	p.AlaGln105ThrLeu	gene
27335	p2_2_S2	2	5140	2.50146e-15	99	98	1	1.02041	ACT	GCC	missense_variant	MODERATE	MPN004	p.AspPhe107GlyLeu	gene
27336	p2_2_S2	2	5155	0	89	88	1	1.13636	A	T	missense_variant	MODERATE	MPN004	p.Tyr112Phe	gene
27337	p2_2_S2	2	5165	1.37468e-15	90	89	1	1.1236	TGACGG	AGATGA	missense_variant	MODERATE	MPN004	p.Gly117Glu	gene
27338	p2_2_S2	2	5181	7.16183e-16	94	93	1	1.07527	T	C	missense_variant	MODERATE	MPN004	p.Phe121Leu	gene
27339	p2_2_S2	2	5200	0	95	94	1	1.06383	A	G	missense_variant	MODERATE	MPN004	p.Asp127Gly	gene
27340	p2_2_S2	2	5202	3.47309e-15	95	94	1	1.06383	CGTC	TGAT	missense_variant	MODERATE	MPN004	p.ArgPro128TrpSer	gene
27341	p2_2_S2	2	5261	7.08649e-16	94	93	1	1.07527	A	T	missense_variant	MODERATE	MPN004	p.Leu147Phe	gene
27342	p2_2_S2	2	5264	1.80835e-15	96	95	1	1.05263	T	C	synonymous_variant	LOW	MPN004	p.Arg148Arg	gene
27343	p2_2_S2	2	5269	1.92889e-15	96	95	1	1.05263	TTGAC	ATGAT	missense_variant	MODERATE	MPN004	p.Ile150Asn	gene
27344	p2_2_S2	2	5285	0	90	88	2	2.27273	C	T	synonymous_variant	LOW	MPN004	p.Val155Val	gene
27345	p2_2_S2	2	5338	1.96114e-16	91	90	1	1.11111	C	A	missense_variant	MODERATE	MPN004	p.Ala173Asp	gene
27346	p2_2_S2	2	5378	1.76315e-15	83	82	1	1.21951	T	A	synonymous_variant	LOW	MPN004	p.Ile186Ile	gene
27347	p2_2_S2	2	5383	3.31723e-16	82	81	1	1.23457	T	A	missense_variant	MODERATE	MPN004	p.Val188Glu	gene
27348	p2_2_S2	2	5384	0	86	85	1	1.17647	A	G	synonymous_variant	LOW	MPN004	p.Val188Val	gene
27349	p2_2_S2	2	5417	3.76926e-16	76	75	1	1.33333	ATCG	TTCT	missense_variant	MODERATE	MPN004	p.Leu199Phe	gene
27350	p2_2_S2	2	5431	6.23069e-15	80	78	2	2.5641	A	G	missense_variant	MODERATE	MPN004	p.Gln204Arg	gene
27351	p2_2_S2	2	5443	0	82	81	1	1.23457	TTTT	CTTC	missense_variant	MODERATE	MPN004	p.LeuLeu208ProSer	gene
27352	p2_2_S2	2	5466	0	85	84	1	1.19048	A	T	missense_variant	MODERATE	MPN004	p.Thr216Ser	gene
27353	p2_2_S2	2	5472	0	82	81	1	1.23457	A	T	missense_variant	MODERATE	MPN004	p.Asn218Tyr	gene
27354	p2_2_S2	2	5473	1.67251e-15	84	82	2	2.43902	ATGAT	GTGAG	missense_variant	MODERATE	MPN004	p.AsnAsp218SerGlu	gene
27355	p2_2_S2	2	5481	0	86	85	1	1.17647	T	C	synonymous_variant	LOW	MPN004	p.Leu221Leu	gene
27356	p2_2_S2	2	5488	0	92	91	1	1.0989	TCAT	CCAA	missense_variant	MODERATE	MPN004	p.ValIle223AlaAsn	gene
27357	p2_2_S2	2	5493	0	85	84	1	1.19048	A	G	missense_variant	MODERATE	MPN004	p.Lys225Glu	gene
27358	p2_2_S2	2	5498	0	93	92	1	1.08696	A	T	synonymous_variant	LOW	MPN004	p.Gly226Gly	gene
27359	p2_2_S2	2	5513	2.60717e-15	97	96	1	1.04167	CGGAG	AGGAA	missense_variant	MODERATE	MPN004	p.Ala233Thr	gene
27360	p2_2_S2	2	5524	0	91	90	1	1.11111	T	C	missense_variant	MODERATE	MPN004	p.Ile235Thr	gene
27361	p2_2_S2	2	5530	0	103	101	2	1.9802	A	T	missense_variant	MODERATE	MPN004	p.Tyr237Phe	gene
27362	p2_2_S2	2	5560	0	88	87	1	1.14943	CTGGGAAGG	GTGGAAAGA	missense_variant	MODERATE	MPN004	p.ThrGlyLysGly247SerGlyLysSer	gene
27363	p2_2_S2	2	5573	0	95	94	1	1.06383	T	G	missense_variant	MODERATE	MPN004	p.Asn251Lys	gene
27364	p2_2_S2	2	5609	0	102	100	2	2	A	T	synonymous_variant	LOW	MPN004	p.Leu263Leu	gene
27365	p2_2_S2	2	5612	1.80835e-15	96	95	1	1.05263	A	C	synonymous_variant	LOW	MPN004	p.Pro264Pro	gene
27366	p2_2_S2	2	5615	2.84048e-15	94	93	1	1.07527	CCGGG	TCGGA	missense_variant	MODERATE	MPN004	p.Ala267Thr	gene
27367	p2_2_S2	2	5620	1.59764e-15	92	91	1	1.0989	C	A	missense_variant	MODERATE	MPN004	p.Ala267Asp	gene
27368	p2_2_S2	2	5632	0	83	78	5	6.41026	T	A	missense_variant	MODERATE	MPN004	p.Val271Asp	gene
27369	p2_2_S2	2	5633	0	85	84	1	1.19048	C	T	synonymous_variant	LOW	MPN004	p.Val271Val	gene
27370	p2_2_S2	2	5655	0	90	89	1	1.1236	A	C	missense_variant	MODERATE	MPN004	p.Asn279His	gene
27371	p2_2_S2	2	5699	0	99	98	1	1.02041	T	C	synonymous_variant	LOW	MPN004	p.Ala293Ala	gene
27372	p2_2_S2	2	5709	7.55688e-15	100	98	2	2.04082	A	C	missense_variant	MODERATE	MPN004	p.Thr297Pro	gene
27373	p2_2_S2	2	5710	6.8859e-15	102	101	1	0.990099	C	A	missense_variant	MODERATE	MPN004	p.Thr297Asn	gene
27374	p2_2_S2	2	5713	0	102	100	2	2	GGATT	CGATA	missense_variant	MODERATE	MPN004	p.Gly298Ala	gene
27375	p2_2_S2	2	5725	0	107	106	1	0.943396	TCCGTG	ACCGAA	missense_variant	MODERATE	MPN004	p.IleArgAsp302AsnArgAsn	gene
27376	p2_2_S2	2	5745	2.17021e-15	98	96	2	2.08333	GAAGG	AAAAA	missense_variant	MODERATE	MPN004	p.GluGly309LysLys	gene
27377	p2_2_S2	2	5788	0	93	92	1	1.08696	CGG	TGA	missense_variant	MODERATE	MPN004	p.ProGlu323LeuLys	gene
27378	p2_2_S2	2	5825	0	81	80	1	1.25	T	A	synonymous_variant	LOW	MPN004	p.Arg335Arg	gene
27379	p2_2_S2	2	5829	7.29273e-15	84	83	1	1.20482	CA	GT	missense_variant	MODERATE	MPN004	p.Gln337Val	gene
27380	p2_2_S2	2	5834	0	76	75	1	1.33333	GCGG	ACGA	synonymous_variant	LOW	MPN004	p.340	gene
27381	p2_2_S2	2	5838	0	80	78	2	2.5641	T	C	missense_variant	MODERATE	MPN004	p.Phe340Leu	gene
27382	p2_2_S2	2	5863	1.36079e-16	86	84	2	2.38095	TTAA	ATAG	missense_variant	MODERATE	MPN004	p.ValLys348AspArg	gene
27383	p2_2_S2	2	5924	4.77691e-15	69	67	2	2.98507	A	G	synonymous_variant	LOW	MPN004	p.Gln368Gln	gene
27384	p2_2_S2	2	5936	2.78986e-16	69	68	1	1.47059	G	A	synonymous_variant	LOW	MPN004	p.Leu372Leu	gene
27385	p2_2_S2	2	5955	0	72	71	1	1.40845	AACC	TACT	missense_variant	MODERATE	MPN004	p.AsnLeu379TyrPhe	gene
27386	p2_2_S2	2	5962	0	73	72	1	1.38889	AGA	TGT	stop_gained	HIGH	MPN004	p.LysLys381*	gene
27387	p2_2_S2	2	5985	0	73	72	1	1.38889	A	T	missense_variant	MODERATE	MPN004	p.Ile389Phe	gene
27388	p2_2_S2	2	5990	2.79528e-15	72	71	1	1.40845	A	T	missense_variant	MODERATE	MPN004	p.Leu390Phe	gene
27389	p2_2_S2	2	6001	1.85355e-15	82	81	1	1.23457	TAA	AAG	stop_gained	HIGH	MPN004	p.LeuIle394*	gene
27390	p2_2_S2	2	6006	0	76	74	2	2.7027	GCG	ACA	missense_variant	MODERATE	MPN004	p.Ala396Thr	gene
27391	p2_2_S2	2	6029	2.26391e-15	69	68	1	1.47059	A	G	synonymous_variant	LOW	MPN004	p.Val403Val	gene
27392	p2_2_S2	2	6050	0	56	55	1	1.81818	C	T	synonymous_variant	LOW	MPN004	p.Ser410Ser	gene
27393	p2_2_S2	2	6056	0	62	61	1	1.63934	T	A	missense_variant	MODERATE	MPN004	p.Asn412Lys	gene
27394	p2_2_S2	2	6086	0	63	62	1	1.6129	A	G	synonymous_variant	LOW	MPN004	p.Glu422Glu	gene
27395	p2_2_S2	2	6090	0	63	62	1	1.6129	T	C	missense_variant	MODERATE	MPN004	p.Phe424Leu	gene
27396	p2_2_S2	2	6092	0	63	62	1	1.6129	C	G	missense_variant	MODERATE	MPN004	p.Phe424Leu	gene
27397	p2_2_S2	2	6101	2.0492e-15	65	64	1	1.5625	T	G	missense_variant	MODERATE	MPN004	p.Asp427Glu	gene
27398	p2_2_S2	2	6127	0	80	79	1	1.26582	A	C	missense_variant	MODERATE	MPN004	p.Asp436Ala	gene
27399	p2_2_S2	2	6140	7.30756e-15	75	74	1	1.35135	T	A	synonymous_variant	LOW	MPN004	p.Arg440Arg	gene
27400	p2_2_S2	2	6174	0	86	85	1	1.17647	A	T	missense_variant	MODERATE	MPN004	p.Thr452Ser	gene
27401	p2_2_S2	2	6207	1.62e-15	92	91	1	1.0989	T	C	missense_variant	MODERATE	MPN004	p.Phe463Leu	gene
27402	p2_2_S2	2	6212	0	99	98	1	1.02041	T	A	missense_variant	MODERATE	MPN004	p.Cys464Trp	gene
27403	p2_2_S2	2	6219	6.50945e-15	107	106	1	0.943396	G	A	missense_variant	MODERATE	MPN004	p.Val467Met	gene
27404	p2_2_S2	2	6220	5.03258e-15	104	103	1	0.970874	TGT	AGA	missense_variant	MODERATE	MPN004	p.ValLeu467GluIle	gene
27405	p2_2_S2	2	6249	4.14407e-15	89	87	2	2.29885	CTAATTAAGGAGC	GTAACAGAGAAGC	missense_variant	MODERATE	MPN004	p.LeuIleLysGlu477ValThrGluLys	gene
27406	p2_2_S2	2	6269	5.08556e-15	106	105	1	0.952381	C	T	synonymous_variant	LOW	MPN004	p.Thr483Thr	gene
27407	p2_2_S2	2	6274	5.91427e-15	95	93	2	2.15054	T	A	missense_variant	MODERATE	MPN004	p.Ile485Asn	gene
27408	p2_2_S2	2	6297	2.95726e-15	110	109	1	0.917431	CGCC	TGCT	missense_variant	MODERATE	MPN004	p.ArgArg493CysCys	gene
27409	p2_2_S2	2	6339	0	120	119	1	0.840336	GATG	CATA	missense_variant	MODERATE	MPN004	p.AspGlu507HisLys	gene
27410	p2_2_S2	2	6346	0	125	124	1	0.806452	A	G	missense_variant	MODERATE	MPN004	p.Asp509Gly	gene
27411	p2_2_S2	2	6352	1.17551e-15	119	118	1	0.847458	T	C	missense_variant	MODERATE	MPN004	p.Ile511Thr	gene
27412	p2_2_S2	2	6392	0	112	111	1	0.900901	T	A	synonymous_variant	LOW	MPN004	p.Gly524Gly	gene
27413	p2_2_S2	2	6393	1.31112e-15	110	109	1	0.917431	T	C	missense_variant	MODERATE	MPN004	p.Tyr525His	gene
27414	p2_2_S2	2	6394	2.94643e-15	115	114	1	0.877193	A	T	missense_variant	MODERATE	MPN004	p.Tyr525Phe	gene
27415	p2_2_S2	2	6404	0	118	117	1	0.854701	G	A	synonymous_variant	LOW	MPN004	p.Arg528Arg	gene
27416	p2_2_S2	2	6435	1.71771e-15	99	98	1	1.02041	CGTG	TGTA	missense_variant	MODERATE	MPN004	p.ArgGly539CysSer	gene
27417	p2_2_S2	2	6469	0	82	81	1	1.23457	A	T	missense_variant	MODERATE	MPN004	p.Tyr550Phe	gene
27418	p2_2_S2	2	6507	7.72451e-16	82	81	1	1.23457	ACC	TCT	missense_variant	MODERATE	MPN004	p.Thr563Ser	gene
27419	p2_2_S2	2	6517	2.62953e-15	81	80	1	1.25	A	G	missense_variant	MODERATE	MPN004	p.Asp566Gly	gene
27420	p2_2_S2	2	6523	1.95102e-15	87	85	2	2.35294	TATT	AATA	stop_gained	HIGH	MPN004	p.LeuPhe568*	gene
27421	p2_2_S2	2	6531	0	81	80	1	1.25	AC	TT	missense_variant	MODERATE	MPN004	p.Thr571Leu	gene
27422	p2_2_S2	2	6537	0	80	79	1	1.26582	AAGGG	TAGCA	stop_gained	HIGH	MPN004	p.LysGly573*	gene
27423	p2_2_S2	2	6561	5.17596e-15	79	78	1	1.28205	GCCC	ACCT	missense_variant	MODERATE	MPN004	p.AlaHis581ThrTyr	gene
27424	p2_2_S2	2	6571	0	80	79	1	1.26582	T	C	missense_variant	MODERATE	MPN004	p.Ile584Thr	gene
27425	p2_2_S2	2	6577	3.6765e-15	79	78	1	1.28205	CGG	TGA	missense_variant	MODERATE	MPN004	p.ProGly586LeuSer	gene
27426	p2_2_S2	2	6587	0	87	86	1	1.16279	T	A	synonymous_variant	LOW	MPN004	p.Arg589Arg	gene
27427	p2_2_S2	2	6597	0	89	88	1	1.13636	GGGATTC	AGGTTTT	missense_variant	MODERATE	MPN004	p.GlyIlePro593ArgPheSer	gene
27428	p2_2_S2	2	6612	5.26637e-15	91	90	1	1.11111	AACCT	TACTC	missense_variant	MODERATE	MPN004	p.AsnLeu598TyrSer	gene
27429	p2_2_S2	2	6618	3.61646e-15	92	91	1	1.0989	A	G	missense_variant	MODERATE	MPN004	p.Ile600Val	gene
27430	p2_2_S2	2	6620	3.23954e-16	91	90	1	1.11111	TAA	CAG	missense_variant	MODERATE	MPN004	p.Lys601Arg	gene
27431	p2_2_S2	2	6631	6.08732e-15	89	87	2	2.29885	A	G	missense_variant	MODERATE	MPN004	p.Lys604Arg	gene
27432	p2_2_S2	2	6649	0	81	80	1	1.25	C	G	missense_variant	MODERATE	MPN004	p.Ala610Gly	gene
27433	p2_2_S2	2	6661	3.53736e-15	79	78	1	1.28205	T	G	missense_variant	MODERATE	MPN004	p.Val614Gly	gene
27434	p2_2_S2	2	6680	3.90275e-15	74	73	1	1.36986	T	C	synonymous_variant	LOW	MPN004	p.Gly620Gly	gene
27435	p2_2_S2	2	6711	1.32619e-15	80	79	1	1.26582	ATTAA	TTTAT	missense_variant	MODERATE	MPN004	p.IleLys631PheMet	gene
27436	p2_2_S2	2	6721	0	81	80	1	1.25	CCAGT	GCAGA	missense_variant	MODERATE	MPN004	p.ThrSer634SerArg	gene
27437	p2_2_S2	2	6746	3.60116e-15	92	91	1	1.0989	C	T	synonymous_variant	LOW	MPN004	p.Ile642Ile	gene
27438	p2_2_S2	2	6749	3.04389e-15	93	92	1	1.08696	GAGT	AAGC	synonymous_variant	LOW	MPN004	p.645	gene
27439	p2_2_S2	2	6758	0	102	99	3	3.0303	T	A	synonymous_variant	LOW	MPN004	p.Gly646Gly	gene
27440	p2_2_S2	2	6760	0	102	100	2	2	AACG	ATCA	missense_variant	MODERATE	MPN004	p.LysArg647AsnHis	gene
27441	p2_2_S2	2	6775	0	100	99	1	1.0101	T	C	missense_variant	MODERATE	MPN004	p.Phe652Ser	gene
27442	p2_2_S2	2	6784	1.61247e-15	92	91	1	1.0989	A	G	missense_variant	MODERATE	MPN004	p.Asn655Ser	gene
27443	p2_2_S2	2	6818	3.47309e-15	101	100	1	1	T	C	synonymous_variant	LOW	MPN004	p.Gly666Gly	gene
27444	p2_2_S2	2	6820	8.21656e-16	101	100	1	1	AAGA	TAGT	missense_variant	MODERATE	MPN004	p.GlnAsp667LeuVal	gene
27445	p2_2_S2	2	6829	7.18749e-15	93	91	2	2.1978	TCTT	CCTC	missense_variant	MODERATE	MPN004	p.IlePhe670ThrSer	gene
27446	p2_2_S2	2	6848	0	87	86	1	1.16279	G	A	synonymous_variant	LOW	MPN004	p.Ala676Ala	gene
27447	p2_2_S2	2	6859	7.17995e-15	84	83	1	1.20482	T	G	missense_variant	MODERATE	MPN004	p.Val680Gly	gene
27448	p2_2_S2	2	6874	0	81	80	1	1.25	A	G	missense_variant	MODERATE	MPN004	p.Asp685Gly	gene
27449	p2_2_S2	2	6876	4.62576e-15	78	76	2	2.63158	A	G	missense_variant	MODERATE	MPN004	p.Thr686Ala	gene
27450	p2_2_S2	2	6881	1.20541e-16	78	77	1	1.2987	C	T	synonymous_variant	LOW	MPN004	p.Val687Val	gene
27451	p2_2_S2	2	6887	0	76	75	1	1.33333	G	A	synonymous_variant	LOW	MPN004	p.Pro689Pro	gene
27452	p2_2_S2	2	6892	4.22129e-16	70	68	2	2.94118	CCCG	GCCA	missense_variant	MODERATE	MPN004	p.SerArg691CysHis	gene
27453	p2_2_S2	2	6903	7.23269e-15	62	61	1	1.63934	A	G	missense_variant	MODERATE	MPN004	p.Met695Val	gene
27454	p2_2_S2	2	6914	0	58	57	1	1.75439	G	A	synonymous_variant	LOW	MPN004	p.Leu698Leu	gene
27455	p2_2_S2	2	6919	0	58	57	1	1.75439	T	C	missense_variant	MODERATE	MPN004	p.Ile700Thr	gene
27456	p2_2_S2	2	6924	0	63	62	1	1.6129	C	T	missense_variant	MODERATE	MPN004	p.Leu702Phe	gene
27457	p2_2_S2	2	6980	7.45871e-15	66	65	1	1.53846	A	T	missense_variant	MODERATE	MPN004	p.Leu720Phe	gene
27458	p2_2_S2	2	7007	0	79	77	2	2.5974	TAAGC	TAGC	frameshift_variant	HIGH	MPN004	p.Lys730fs	gene
27459	p2_2_S2	2	7024	3.23954e-16	82	81	1	1.23457	A	G	missense_variant	MODERATE	MPN004	p.Asp735Gly	gene
27460	p2_2_S2	2	7071	1.97409e-15	87	86	1	1.16279	C	G	missense_variant	MODERATE	MPN004	p.Arg751Gly	gene
27461	p2_2_S2	2	7091	0	80	79	1	1.26582	T	C	synonymous_variant	LOW	MPN004	p.Gly757Gly	gene
27462	p2_2_S2	2	7100	0	81	80	1	1.25	G	A	synonymous_variant	LOW	MPN004	p.Val760Val	gene
27463	p2_2_S2	2	7123	3.38292e-15	88	87	1	1.14943	A	G	missense_variant	MODERATE	MPN004	p.Asn768Ser	gene
27464	p2_2_S2	2	7134	0	79	78	1	1.28205	TTA	ATT	missense_variant	MODERATE	MPN004	p.Leu772Ile	gene
27465	p2_2_S2	2	7165	3.58633e-15	67	66	1	1.51515	GGATTAGT	AGATAAGA	missense_variant	MODERATE	MPN004	p.ArgIleSer782GlnIleArg	gene
27466	p2_2_S2	2	7187	7.30756e-15	75	74	1	1.35135	A	G	synonymous_variant	LOW	MPN004	p.Ser789Ser	gene
27467	p2_2_S2	2	7204	0	80	79	1	1.26582	CTT	TTA	missense_variant	MODERATE	MPN004	p.ThrSer795IleThr	gene
27468	p2_2_S2	2	7211	0	80	79	1	1.26582	TGT	AGC	missense_variant	MODERATE	MPN004	p.Val798Ala	gene
27469	p2_2_S2	2	7267	2.78774e-15	72	71	1	1.40845	A	G	missense_variant	MODERATE	MPN004	p.Lys816Arg	gene
27470	p2_2_S2	2	7269	0	71	70	1	1.42857	A	G	missense_variant	MODERATE	MPN004	p.Lys817Glu	gene
27471	p2_2_S2	2	7299	0	79	78	1	1.28205	ACCGAG	GCTGAA	missense_variant	MODERATE	MPN004	p.Thr827Ala	gene
27472	p2_2_S2	2	7305	0	76	75	1	1.33333	ACAGA	GCAGT	missense_variant	MODERATE	MPN004	p.ThrAsp829AlaVal	gene
27473	p2_2_S2	2	7316	0	76	74	2	2.7027	T	A	stop_gained	HIGH	MPN005	p.Leu2*	essential
27474	p2_2_S2	2	7322	8.02821e-16	72	71	1	1.40845	GAAA	AAAG	missense_variant	MODERATE	MPN005	p.ArgAsn4GlnSer	essential
27475	p2_2_S2	2	7336	2.78045e-15	72	71	1	1.40845	A	C	missense_variant	MODERATE	MPN004	p.Gln839Pro	gene
27476	p2_2_S2	2	7353	7.45094e-15	66	65	1	1.53846	T	A	missense_variant	MODERATE	MPN005	p.Phe14Leu	essential
27477	p2_2_S2	2	7354	4.18903e-15	66	65	1	1.53846	AAAAAGAA	GAGTAGAG	stop_gained	HIGH	MPN005	p.LysLysLys15*	essential
27478	p2_2_S2	2	7368	0	71	69	2	2.89855	TGAACG	TCAACA	missense_variant	MODERATE	MPN005	p.GluArg20GlnGln	essential
27479	p2_2_S2	2	7390	4.89698e-16	73	72	1	1.38889	C	T	stop_gained	HIGH	MPN005	p.Gln27*	essential
27480	p2_2_S2	2	7402	4.7842e-15	69	67	2	2.98507	T	A	missense_variant	MODERATE	MPN005	p.Tyr31Asn	essential
27481	p2_2_S2	2	7455	3.52982e-15	79	78	1	1.28205	C	T	synonymous_variant	LOW	MPN005	p.Ala48Ala	essential
27482	p2_2_S2	2	7468	0	80	79	1	1.26582	A	C	missense_variant	MODERATE	MPN005	p.Thr53Pro	essential
27483	p2_2_S2	2	7474	1.24543e-16	78	77	1	1.2987	T	C	synonymous_variant	LOW	MPN005	p.Leu55Leu	essential
27484	p2_2_S2	2	7518	0	83	82	1	1.21951	AAA	TAT	missense_variant	MODERATE	MPN005	p.LeuLys69PheMet	essential
27485	p2_2_S2	2	7536	2.48851e-16	78	77	1	1.2987	AAA	GAT	missense_variant	MODERATE	MPN005	p.Lys76Met	essential
27486	p2_2_S2	2	7549	2.64484e-15	81	80	1	1.25	G	A	missense_variant	MODERATE	MPN005	p.Glu80Lys	essential
27487	p2_2_S2	2	7550	0	76	75	1	1.33333	A	T	missense_variant	MODERATE	MPN005	p.Glu80Val	essential
27488	p2_2_S2	2	7551	0	73	72	1	1.38889	ACAGC	TCTGG	missense_variant	MODERATE	MPN005	p.GluGlnLeu80AspLeuVal	essential
27489	p2_2_S2	2	7559	5.05236e-16	73	72	1	1.38889	A	G	missense_variant	MODERATE	MPN005	p.Asn83Ser	essential
27490	p2_2_S2	2	7566	2.56149e-16	69	68	1	1.47059	T	C	synonymous_variant	LOW	MPN005	p.Ala85Ala	essential
27491	p2_2_S2	2	7593	2.27521e-15	69	68	1	1.47059	A	G	synonymous_variant	LOW	MPN005	p.Gln94Gln	essential
27492	p2_2_S2	2	7603	0	74	73	1	1.36986	TTA	ATC	missense_variant	MODERATE	MPN005	p.Leu98Ile	essential
27493	p2_2_S2	2	7623	7.87518e-16	72	71	1	1.40845	TG	CA	missense_variant	MODERATE	MPN005	p.Asp105Asn	essential
27494	p2_2_S2	2	7635	0	73	71	2	2.8169	A	C	synonymous_variant	LOW	MPN005	p.Val108Val	essential
27495	p2_2_S2	2	7638	0	71	70	1	1.42857	A	T	synonymous_variant	LOW	MPN005	p.Pro109Pro	essential
27496	p2_2_S2	2	7644	2.97609e-15	70	68	2	2.94118	A	G	synonymous_variant	LOW	MPN005	p.Gly111Gly	essential
27497	p2_2_S2	2	7646	0	68	66	2	3.0303	GGGAT	AGGAC	missense_variant	MODERATE	MPN005	p.Arg112Gln	essential
27498	p2_2_S2	2	7653	3.88768e-15	74	73	1	1.36986	A	G	synonymous_variant	LOW	MPN005	p.Glu114Glu	essential
27499	p2_2_S2	2	7659	2.26038e-15	69	68	1	1.47059	T	A	synonymous_variant	LOW	MPN005	p.Ala116Ala	essential
27500	p2_2_S2	2	7661	1.00977e-15	76	75	1	1.33333	A	G	missense_variant	MODERATE	MPN005	p.Asn117Ser	essential
27501	p2_2_S2	2	7664	3.11947e-15	76	75	1	1.33333	TAGAA	CAGAG	missense_variant	MODERATE	MPN005	p.Leu118Ser	essential
27502	p2_2_S2	2	7694	0	85	83	2	2.40964	T	G	missense_variant	MODERATE	MPN005	p.Val128Gly	essential
27503	p2_2_S2	2	7713	0	76	75	1	1.33333	ACCCCACTGGGAGT	GCGCTTCTGTATGG	missense_variant	MODERATE	MPN005	p.ProHisTrpGluLeu135ArgPheCysMetVal	essential
27504	p2_2_S2	2	7729	2.49769e-15	90	89	1	1.1236	T	C	missense_variant	MODERATE	MPN005	p.Cys140Arg	essential
27505	p2_2_S2	2	7734	8.70626e-16	85	84	1	1.19048	A	T	missense_variant	MODERATE	MPN005	p.Glu141Asp	essential
27506	p2_2_S2	2	7746	1.75538e-15	83	82	1	1.21951	A	T	missense_variant	MODERATE	MPN005	p.Leu145Phe	essential
27507	p2_2_S2	2	7821	0	94	93	1	1.07527	C	A	synonymous_variant	LOW	MPN005	p.Leu170Leu	essential
27508	p2_2_S2	2	7839	0	91	90	1	1.11111	AATGA	TATGT	missense_variant	MODERATE	MPN005	p.LeuMetIle176PheMetPhe	essential
27509	p2_2_S2	2	7852	0	100	99	1	1.0101	AACA	TACT	stop_gained	HIGH	MPN005	p.AsnLys181*	essential
27510	p2_2_S2	2	7863	3.39798e-15	88	87	1	1.14943	A	G	synonymous_variant	LOW	MPN005	p.Lys184Lys	essential
27511	p2_2_S2	2	7865	3.58633e-15	92	91	1	1.0989	A	C	missense_variant	MODERATE	MPN005	p.Tyr185Ser	essential
27512	p2_2_S2	2	7873	7.00668e-15	93	92	1	1.08696	T	G	missense_variant	MODERATE	MPN005	p.Trp188Gly	essential
27513	p2_2_S2	2	7875	2.52383e-15	97	95	2	2.10526	A	T	missense_variant	MODERATE	MPN005	p.Trp188Cys	essential
27514	p2_2_S2	2	7878	1.60494e-15	92	91	1	1.0989	C	G	missense_variant	MODERATE	MPN005	p.Asn189Lys	essential
27515	p2_2_S2	2	7895	5.38691e-15	88	87	1	1.14943	A	G	missense_variant	MODERATE	MPN005	p.Asn195Ser	essential
27516	p2_2_S2	2	7926	0	83	82	1	1.21951	ACCC	TCCT	synonymous_variant	LOW	MPN005	p.207	essential
27517	p2_2_S2	2	7963	5.54488e-15	79	78	1	1.28205	A	G	missense_variant	MODERATE	MPN005	p.Thr218Ala	essential
27518	p2_2_S2	2	7967	5.51475e-15	79	78	1	1.28205	G	A	missense_variant	MODERATE	MPN005	p.Arg219His	essential
27519	p2_2_S2	2	7975	0	75	74	1	1.35135	CTCTCCCCGACCCTAG	TTCTTCCTGACTCTAA	missense_variant	MODERATE	MPN005	p.LeuSerProThrLeuGlu222PhePheLeuThrLeuLys	essential
27520	p2_2_S2	2	8006	0	88	86	2	2.32558	ACC	TCT	missense_variant	MODERATE	MPN005	p.AsnLeu232IlePhe	essential
27521	p2_2_S2	2	8015	7.16442e-15	84	83	1	1.20482	C	T	missense_variant	MODERATE	MPN005	p.Ala235Val	essential
27522	p2_2_S2	2	8029	2.59187e-15	88	86	2	2.32558	ACGG	GCGA	missense_variant	MODERATE	MPN005	p.ThrGlu240AlaLys	essential
27523	p2_2_S2	2	8040	3.39045e-15	88	87	1	1.14943	A	T	missense_variant	MODERATE	MPN005	p.Glu243Asp	essential
27524	p2_2_S2	2	8115	3.23954e-16	82	81	1	1.23457	T	C	synonymous_variant	LOW	MPN005	p.Gly268Gly	essential
27525	p2_2_S2	2	8117	3.39045e-15	88	87	1	1.14943	C	G	missense_variant	MODERATE	MPN005	p.Thr269Arg	essential
27526	p2_2_S2	2	8124	0	89	88	1	1.13636	C	G	synonymous_variant	LOW	MPN005	p.Arg271Arg	essential
27527	p2_2_S2	2	8147	1.97409e-15	87	86	1	1.16279	A	G	missense_variant	MODERATE	MPN005	p.Glu279Gly	essential
27528	p2_2_S2	2	8158	7.17195e-15	84	83	1	1.20482	T	C	missense_variant	MODERATE	MPN005	p.Phe283Leu	essential
27529	p2_2_S2	2	8175	3.39257e-16	82	81	1	1.23457	A	G	synonymous_variant	LOW	MPN005	p.Glu288Glu	essential
27530	p2_2_S2	2	8189	0	86	85	1	1.17647	T	C	missense_variant	MODERATE	MPN005	p.Leu293Pro	essential
27531	p2_2_S2	2	8205	0	80	79	1	1.26582	G	A	synonymous_variant	LOW	MPN005	p.Arg298Arg	essential
27532	p2_2_S2	2	8207	0	81	80	1	1.25	ACG	TCA	missense_variant	MODERATE	MPN005	p.AspAla299ValThr	essential
27533	p2_2_S2	2	8220	1.12654e-15	83	82	1	1.21951	TTTGT	CTTGC	synonymous_variant	LOW	MPN005	p.306	essential
27534	p2_2_S2	2	8226	0	82	81	1	1.23457	A	T	missense_variant	MODERATE	MPN005	p.Leu305Phe	essential
27535	p2_2_S2	2	8246	6.93887e-15	80	79	1	1.26582	G	A	missense_variant	MODERATE	MPN005	p.Arg312His	essential
27536	p2_2_S2	2	8256	0	84	82	2	2.43902	A	T	missense_variant	MODERATE	MPN005	p.Leu315Phe	essential
27537	p2_2_S2	2	8269	0	71	70	1	1.42857	G	C	missense_variant	MODERATE	MPN005	p.Asp320His	essential
27538	p2_2_S2	2	8274	2.26038e-15	69	68	1	1.47059	G	A	missense_variant	MODERATE	MPN005	p.Met321Ile	essential
27539	p2_2_S2	2	8292	0	74	73	1	1.36986	AACCT	GACCA	missense_variant	MODERATE	MPN005	p.Tyr329Asn	essential
27540	p2_2_S2	2	8314	0	76	75	1	1.33333	A	G	missense_variant	MODERATE	MPN005	p.Met335Val	essential
27541	p2_2_S2	2	8364	0	84	83	1	1.20482	T	C	synonymous_variant	LOW	MPN005	p.Gly351Gly	essential
27542	p2_2_S2	2	8386	0	95	94	1	1.06383	A	G	missense_variant	MODERATE	MPN005	p.Met359Val	essential
27543	p2_2_S2	2	8399	5.24377e-15	97	96	1	1.04167	A	T	missense_variant	MODERATE	MPN005	p.Lys363Met	essential
27544	p2_2_S2	2	8460	3.75984e-15	83	82	1	1.21951	T	G	missense_variant	MODERATE	MPN005	p.Ile383Met	essential
27545	p2_2_S2	2	8468	0	89	88	1	1.13636	T	C	missense_variant	MODERATE	MPN005	p.Ile386Thr	essential
27546	p2_2_S2	2	8469	3.58633e-15	92	91	1	1.0989	C	T	synonymous_variant	LOW	MPN005	p.Ile386Ile	essential
27547	p2_2_S2	2	8492	0	82	81	1	1.23457	ACCAA	GCCAT	missense_variant	MODERATE	MPN005	p.TyrGln394CysHis	essential
27548	p2_2_S2	2	8511	0	77	76	1	1.31579	A	G	synonymous_variant	LOW	MPN005	p.Glu400Glu	essential
27549	p2_2_S2	2	8521	0	76	75	1	1.33333	C	T	missense_variant	MODERATE	MPN005	p.Pro404Ser	essential
27550	p2_2_S2	2	8524	3.23954e-16	82	81	1	1.23457	C	G	missense_variant	MODERATE	MPN005	p.Gln405Glu	essential
27551	p2_2_S2	2	8535	0	72	71	1	1.40845	G	C	missense_variant	MODERATE	MPN005	p.Leu408Phe	essential
27552	p2_2_S2	2	8538	0	74	73	1	1.36986	ATAC	GTAT	synonymous_variant	LOW	MPN005	p.411	essential
27553	p2_2_S2	2	8548	0	69	67	2	2.98507	T	C	missense_variant	MODERATE	MPN005	p.Phe413Leu	essential
27554	p2_2_S2	2	8550	7.353e-15	69	68	1	1.47059	TGAC	AGAT	missense_variant	MODERATE	MPN005	p.Phe413Leu	essential
27555	p2_2_S2	2	8560	3.66896e-15	70	69	1	1.44928	A	T	missense_variant	MODERATE	MPN005	p.Thr417Ser	essential
27556	p2_2_S2	2	8565	3.88768e-15	74	73	1	1.36986	A	G	synonymous_variant	LOW	MPN005	p.Lys418Lys	essential
27557	p2_2_S2	2	8569	2.24531e-15	78	77	1	1.2987	AAATA	GAATG	upstream_gene_variant	MODIFIER	MPN006	c.-10_-6delAAATAinsGAATG	intergenic
27558	p2_2_S2	2	8574	0	66	65	1	1.53846	A	T	upstream_gene_variant	MODIFIER	MPN006	c.-5A>T	intergenic
27559	p2_2_S2	2	8583	0	72	71	1	1.40845	A	T	missense_variant	MODERATE	MPN006	p.Lys2Ile	gene
27560	p2_2_S2	2	8584	0	66	65	1	1.53846	A	T	missense_variant	MODERATE	MPN006	p.Lys2Asn	gene
27561	p2_2_S2	2	8604	0	84	83	1	1.20482	T	C	missense_variant	MODERATE	MPN006	p.Ile9Thr	gene
27562	p2_2_S2	2	8622	0	91	89	2	2.24719	C	T	missense_variant	MODERATE	MPN006	p.Ala15Val	gene
27563	p2_2_S2	2	8630	0	87	86	1	1.16279	A	G	missense_variant	MODERATE	MPN006	p.Thr18Ala	gene
27564	p2_2_S2	2	8722	0	91	90	1	1.11111	A	T	missense_variant	MODERATE	MPN006	p.Leu48Phe	gene
27565	p2_2_S2	2	8734	0	95	94	1	1.06383	C	G	missense_variant	MODERATE	MPN006	p.Ile52Met	gene
27566	p2_2_S2	2	8753	5.22846e-15	97	96	1	1.04167	G	C	missense_variant	MODERATE	MPN006	p.Glu59Gln	gene
27567	p2_2_S2	2	8801	1.24543e-16	78	77	1	1.2987	A	G	missense_variant	MODERATE	MPN006	p.Thr75Ala	gene
27568	p2_2_S2	2	8806	0	82	80	2	2.5	A	C	missense_variant	MODERATE	MPN006	p.Glu76Asp	gene
27569	p2_2_S2	2	8808	0	85	84	1	1.19048	A	C	missense_variant	MODERATE	MPN006	p.His77Pro	gene
27570	p2_2_S2	2	8822	0	87	86	1	1.16279	ATCCA	GTCCT	missense_variant	MODERATE	MPN006	p.IleGln82ValLeu	gene
27571	p2_2_S2	2	8836	0	88	87	1	1.14943	ACAA	GCAT	missense_variant	MODERATE	MPN006	p.Gln87His	gene
27572	p2_2_S2	2	8850	2.49769e-15	90	89	1	1.1236	T	A	stop_gained	HIGH	MPN006	p.Leu91*	gene
27573	p2_2_S2	2	8862	8.96759e-16	92	90	2	2.22222	A	G	missense_variant	MODERATE	MPN006	p.Asp95Gly	gene
27574	p2_2_S2	2	8881	1.76315e-15	83	82	1	1.21951	T	C	synonymous_variant	LOW	MPN006	p.Ser101Ser	gene
27575	p2_2_S2	2	8889	0	89	88	1	1.13636	A	T	missense_variant	MODERATE	MPN006	p.Tyr104Phe	gene
27576	p2_2_S2	2	8904	3.75984e-15	83	82	1	1.21951	A	T	missense_variant	MODERATE	MPN006	p.Lys109Ile	gene
27577	p2_2_S2	2	8916	0	84	83	1	1.20482	T	C	missense_variant	MODERATE	MPN006	p.Leu113Pro	gene
27578	p2_2_S2	2	8928	1.97409e-15	87	86	1	1.16279	A	T	missense_variant	MODERATE	MPN006	p.Lys117Ile	gene
27579	p2_2_S2	2	8959	0	86	85	1	1.17647	T	C	synonymous_variant	LOW	MPN006	p.Ser127Ser	gene
27580	p2_2_S2	2	8967	3.75207e-15	83	82	1	1.21951	A	G	missense_variant	MODERATE	MPN006	p.Asp130Gly	gene
27581	p2_2_S2	2	8991	0	89	88	1	1.13636	A	G	missense_variant	MODERATE	MPN006	p.Asp138Gly	gene
27582	p2_2_S2	2	8994	0	88	87	1	1.14943	TTGA	ATGT	missense_variant	MODERATE	MPN006	p.PheGlu139TyrVal	gene
27583	p2_2_S2	2	9007	3.31723e-16	82	81	1	1.23457	A	T	missense_variant	MODERATE	MPN006	p.Leu143Phe	gene
27584	p2_2_S2	2	9011	0	84	83	1	1.20482	CGG	AGA	synonymous_variant	LOW	MPN006	p.146	gene
27585	p2_2_S2	2	9015	3.75984e-15	83	82	1	1.21951	T	C	missense_variant	MODERATE	MPN006	p.Met146Thr	gene
27586	p2_2_S2	2	9033	1.20541e-16	78	77	1	1.2987	A	G	missense_variant	MODERATE	MPN006	p.Asp152Gly	gene
27587	p2_2_S2	2	9072	1.97409e-15	87	86	1	1.16279	T	A	missense_variant	MODERATE	MPN006	p.Phe165Tyr	gene
27588	p2_2_S2	2	9073	2.64484e-15	81	80	1	1.25	T	A	missense_variant	MODERATE	MPN006	p.Phe165Leu	gene
27589	p2_2_S2	2	9093	1.23955e-15	80	79	1	1.26582	A	T	missense_variant	MODERATE	MPN006	p.Tyr172Phe	gene
27590	p2_2_S2	2	9110	2.16621e-15	72	71	1	1.40845	AACA	TACT	stop_gained	HIGH	MPN006	p.AsnLys178*	gene
27591	p2_2_S2	2	9115	0	80	79	1	1.26582	A	C	missense_variant	MODERATE	MPN006	p.Lys179Asn	gene
27592	p2_2_S2	2	9137	3.78597e-15	77	76	1	1.31579	CAAA	TAAT	stop_gained	HIGH	MPN006	p.GlnAsn187*	gene
27593	p2_2_S2	2	9146	1.02507e-15	76	75	1	1.33333	ACG	TCA	missense_variant	MODERATE	MPN006	p.Thr190Ser	gene
27594	p2_2_S2	2	9170	5.20586e-15	72	71	1	1.40845	GAA	CAG	missense_variant	MODERATE	MPN006	p.Glu198Gln	gene
27595	p2_2_S2	2	9175	7.08955e-15	71	70	1	1.42857	A	G	synonymous_variant	LOW	MPN006	p.Gln199Gln	gene
27596	p2_2_S2	2	9199	3.29981e-15	78	77	1	1.2987	CAC	TAT	missense_variant	MODERATE	MPN006	p.Thr208Met	gene
27597	p2_2_S2	2	9232	6.93887e-15	80	79	1	1.26582	T	A	missense_variant	MODERATE	MPN007	p.Tyr17Asn	gene
27598	p2_2_S2	2	9248	2.71688e-16	69	68	1	1.47059	T	A	stop_gained	HIGH	MPN007	p.Leu22*	gene
27599	p2_2_S2	2	9265	0	80	79	1	1.26582	CGGGTC	GGGATT	missense_variant	MODERATE	MPN007	p.ArgVal28GlyIle	gene
27600	p2_2_S2	2	9317	0	85	84	1	1.19048	A	G	missense_variant	MODERATE	MPN007	p.Glu45Gly	gene
27601	p2_2_S2	2	9318	1.74784e-15	83	82	1	1.21951	A	G	synonymous_variant	LOW	MPN007	p.Glu45Glu	gene
27602	p2_2_S2	2	9321	2.26485e-16	85	84	1	1.19048	TCTC	ACTT	synonymous_variant	LOW	MPN007	p.48	gene
27603	p2_2_S2	2	9333	3.75207e-15	83	82	1	1.21951	T	C	synonymous_variant	LOW	MPN007	p.Thr50Thr	gene
27604	p2_2_S2	2	9347	3.54089e-15	79	78	1	1.28205	A	T	missense_variant	MODERATE	MPN007	p.Tyr55Phe	gene
27605	p2_2_S2	2	9406	1.76315e-15	83	82	1	1.21951	T	A	missense_variant	MODERATE	MPN007	p.Leu75Met	gene
27606	p2_2_S2	2	9416	4.04566e-15	65	64	1	1.5625	A	T	missense_variant	MODERATE	MPN007	p.Gln78Leu	gene
27607	p2_2_S2	2	9441	2.63919e-16	69	68	1	1.47059	G	T	synonymous_variant	LOW	MPN007	p.Leu86Leu	gene
27608	p2_2_S2	2	9443	0	68	67	1	1.49254	A	G	missense_variant	MODERATE	MPN007	p.Tyr87Cys	gene
27609	p2_2_S2	2	9477	0	62	61	1	1.63934	G	A	synonymous_variant	LOW	MPN007	p.Thr98Thr	gene
27610	p2_2_S2	2	9498	1.95879e-15	62	61	1	1.63934	TTT	ATA	stop_gained	HIGH	MPN007	p.Leu106*	gene
27611	p2_2_S2	2	9610	0	63	62	1	1.6129	A	G	missense_variant	MODERATE	MPN007	p.Thr143Ala	gene
27612	p2_2_S2	2	9611	5.46225e-15	66	65	1	1.53846	C	G	missense_variant	MODERATE	MPN007	p.Thr143Ser	gene
27613	p2_2_S2	2	9636	0	74	71	3	4.22535	T	A	missense_variant	MODERATE	MPN007	p.Ser151Arg	gene
27614	p2_2_S2	2	9653	3.91758e-15	74	73	1	1.36986	T	C	missense_variant	MODERATE	MPN007	p.Leu157Pro	gene
27615	p2_2_S2	2	9709	2.117e-15	78	77	1	1.2987	A	T	missense_variant	MODERATE	MPN007	p.Thr176Ser	gene
27616	p2_2_S2	2	9712	3.68403e-15	70	69	1	1.44928	C	T	missense_variant	MODERATE	MPN007	p.Arg177Cys	gene
27617	p2_2_S2	2	9732	2.56173e-15	70	69	1	1.44928	GACACT	AACTCA	missense_variant	MODERATE	MPN007	p.Leu185His	gene
27618	p2_2_S2	2	9746	3.53359e-15	76	75	1	1.33333	AGAAA	TGAAG	missense_variant	MODERATE	MPN007	p.Lys188Met	gene
27619	p2_2_S2	2	9769	2.00423e-15	81	80	1	1.25	CACG	TACA	missense_variant	MODERATE	MPN007	p.HisGlu196TyrLys	gene
27620	p2_2_S2	2	9785	3.52982e-15	79	78	1	1.28205	T	G	missense_variant	MODERATE	MPN007	p.Leu201Trp	gene
27621	p2_2_S2	2	9802	1.507e-15	71	70	1	1.42857	CAAAC	TAAAT	stop_gained	HIGH	MPN007	p.GlnThr207*	gene
27622	p2_2_S2	2	9809	4.89698e-16	73	72	1	1.38889	A	G	missense_variant	MODERATE	MPN007	p.Glu209Gly	gene
27623	p2_2_S2	2	9836	0	68	67	1	1.49254	T	C	missense_variant	MODERATE	MPN007	p.Val218Ala	gene
27624	p2_2_S2	2	9844	0	74	71	3	4.22535	A	C	missense_variant	MODERATE	MPN007	p.Thr221Pro	gene
27625	p2_2_S2	2	9863	0	70	69	1	1.44928	AGG	TGC	missense_variant	MODERATE	MPN007	p.LysAsp227MetHis	gene
27626	p2_2_S2	2	9892	0	82	81	1	1.23457	TTG	ATA	missense_variant	MODERATE	MPN007	p.Leu237Ile	gene
27627	p2_2_S2	2	9906	0	85	84	1	1.19048	A	C	synonymous_variant	LOW	MPN007	p.Pro241Pro	gene
27628	p2_2_S2	2	9932	0	76	75	1	1.33333	T	G	missense_variant	MODERATE	MPN007	p.Leu250Arg	gene
27629	p2_2_S2	2	9943	0	81	80	1	1.25	TAAGATG	AAAAATA	initiator_codon_variant	LOW	MPN008	p.Met1?	gene
27630	p2_2_S2	2	9952	0	81	80	1	1.25	C	T	synonymous_variant	LOW	MPN008	p.Asp2Asp	gene
27631	p2_2_S2	2	9984	0	81	80	1	1.25	CGCC	TGCG	missense_variant	MODERATE	MPN008	p.AlaPro13ValArg	gene
27632	p2_2_S2	2	9992	3.23224e-15	97	96	1	1.04167	A	C	missense_variant	MODERATE	MPN008	p.Asn16His	gene
27633	p2_2_S2	2	9993	3.23224e-15	97	96	1	1.04167	A	T	missense_variant	MODERATE	MPN008	p.Asn16Ile	gene
27634	p2_2_S2	2	10012	1.46203e-15	101	100	1	1	T	A	synonymous_variant	LOW	MPN008	p.Ile22Ile	gene
27635	p2_2_S2	2	10018	0	95	94	1	1.06383	A	G	synonymous_variant	LOW	MPN008	p.Leu24Leu	gene
27636	p2_2_S2	2	10074	6.91627e-15	109	108	1	0.925926	CGTTG	TGTTA	missense_variant	MODERATE	MPN008	p.Pro43Leu	gene
27637	p2_2_S2	2	10083	0	97	96	1	1.04167	TGCGG	CGCGA	missense_variant	MODERATE	MPN008	p.Met46Thr	gene
27638	p2_2_S2	2	10094	4.88238e-15	97	96	1	1.04167	CGCG	TGCC	missense_variant	MODERATE	MPN008	p.ArgVal50CysLeu	gene
27639	p2_2_S2	2	10106	4.77691e-15	99	98	1	1.02041	ATT	GTC	missense_variant	MODERATE	MPN008	p.Ile54Val	gene
27640	p2_2_S2	2	10139	0	89	88	1	1.13636	T	C	synonymous_variant	LOW	MPN008	p.Leu65Leu	gene
27641	p2_2_S2	2	10146	0	88	87	1	1.14943	TTAA	ATAT	missense_variant	MODERATE	MPN008	p.PheLys67TyrIle	gene
27642	p2_2_S2	2	10152	0	89	88	1	1.13636	TTG	TCTG	frameshift_variant	HIGH	MPN008	p.Val70fs	gene
27643	p2_2_S2	2	10155	5.38691e-15	88	87	1	1.14943	T	C	missense_variant	MODERATE	MPN008	p.Val70Ala	gene
27644	p2_2_S2	2	10163	1.94372e-15	82	81	1	1.23457	AACTC	TACTG	missense_variant	MODERATE	MPN008	p.AsnSer73TyrCys	gene
27645	p2_2_S2	2	10189	1.22848e-15	77	75	2	2.66667	T	C	synonymous_variant	LOW	MPN008	p.Ile81Ile	gene
27646	p2_2_S2	2	10199	0	77	76	1	1.31579	T	C	missense_variant	MODERATE	MPN008	p.Cys85Arg	gene
27647	p2_2_S2	2	10204	1.75538e-15	83	82	1	1.21951	T	A	missense_variant	MODERATE	MPN008	p.His86Gln	gene
27648	p2_2_S2	2	10223	0	72	71	1	1.40845	AACGAA	TTCGAT	missense_variant	MODERATE	MPN008	p.AsnGlu93PheAsp	gene
27649	p2_2_S2	2	10230	0	71	70	1	1.42857	T	C	missense_variant	MODERATE	MPN008	p.Ile95Thr	gene
27650	p2_2_S2	2	10233	6.41151e-15	71	69	2	2.89855	TTGGT	ATGGA	missense_variant	MODERATE	MPN008	p.Ile96Asn	gene
27651	p2_2_S2	2	10251	0	72	70	2	2.85714	A	G	missense_variant	MODERATE	MPN008	p.His102Arg	gene
27652	p2_2_S2	2	10252	5.32664e-15	68	67	1	1.49254	CGGGGCGG	TGAGGTGA	missense_variant	MODERATE	MPN008	p.GlyAlaVal103GluValIle	gene
27653	p2_2_S2	2	10284	1.88345e-15	83	82	1	1.21951	CGC	GGG	missense_variant	MODERATE	MPN008	p.ThrGln113ArgGlu	gene
27654	p2_2_S2	2	10290	7.29273e-15	75	73	2	2.73973	GCGGCT	ACAGCT	missense_variant	MODERATE	MPN008	p.ArgGly115HisSer	gene
27655	p2_2_S2	2	10300	3.13406e-15	76	75	1	1.33333	CAACG	TAACA	missense_variant	MODERATE	MPN008	p.Gly120Ser	gene
27656	p2_2_S2	2	10357	0	89	88	1	1.13636	G	A	synonymous_variant	LOW	MPN008	p.Pro137Pro	gene
27657	p2_2_S2	2	10396	2.68981e-15	88	86	2	2.32558	TGGTC	AGGTG	missense_variant	MODERATE	MPN008	p.Gln152Glu	gene
27658	p2_2_S2	2	10402	1.86485e-15	90	89	1	1.1236	AGTT	GGTG	synonymous_variant	LOW	MPN008	p.154	gene
27659	p2_2_S2	2	10428	0	76	75	1	1.33333	T	G	missense_variant	MODERATE	MPN008	p.Val161Gly	gene
27660	p2_2_S2	2	10437	3.75207e-15	83	82	1	1.21951	T	C	missense_variant	MODERATE	MPN008	p.Leu164Ser	gene
27661	p2_2_S2	2	10451	6.93087e-15	80	79	1	1.26582	A	G	missense_variant	MODERATE	MPN008	p.Met169Val	gene
27662	p2_2_S2	2	10453	0	85	84	1	1.19048	GCA	GA	frameshift_variant	HIGH	MPN008	p.Gln170fs	gene
27663	p2_2_S2	2	10461	0	86	85	1	1.17647	A	T	missense_variant	MODERATE	MPN008	p.Glu172Val	gene
27664	p2_2_S2	2	10476	8.7816e-16	85	84	1	1.19048	A	T	missense_variant	MODERATE	MPN008	p.Tyr177Phe	gene
27665	p2_2_S2	2	10477	3.7443e-15	83	82	1	1.21951	C	T	synonymous_variant	LOW	MPN008	p.Tyr177Tyr	gene
27666	p2_2_S2	2	10484	3.7443e-15	83	82	1	1.21951	T	A	missense_variant	MODERATE	MPN008	p.Tyr180Asn	gene
27667	p2_2_S2	2	10513	5.53005e-15	79	78	1	1.28205	A	C	synonymous_variant	LOW	MPN008	p.Thr189Thr	gene
27668	p2_2_S2	2	10536	1.24543e-16	78	77	1	1.2987	T	C	missense_variant	MODERATE	MPN008	p.Ile197Thr	gene
27669	p2_2_S2	2	10542	5.54488e-15	79	78	1	1.28205	A	G	missense_variant	MODERATE	MPN008	p.Gln199Arg	gene
27670	p2_2_S2	2	10590	0	96	95	1	1.05263	A	T	missense_variant	MODERATE	MPN008	p.Lys215Ile	gene
27671	p2_2_S2	2	10621	0	104	103	1	0.970874	T	G	missense_variant	MODERATE	MPN008	p.Asn225Lys	gene
27672	p2_2_S2	2	10701	6.72769e-15	111	110	1	0.909091	C	G	missense_variant	MODERATE	MPN008	p.Thr252Ser	gene
27673	p2_2_S2	2	10704	0	109	106	3	2.83019	G	A	missense_variant	MODERATE	MPN008	p.Arg253His	gene
27674	p2_2_S2	2	10715	0	114	113	1	0.884956	G	A	missense_variant	MODERATE	MPN008	p.Glu257Lys	gene
27675	p2_2_S2	2	10718	1.68004e-15	105	104	1	0.961538	G	T	missense_variant	MODERATE	MPN008	p.Gly258Cys	gene
27676	p2_2_S2	2	10720	0	104	103	1	0.970874	T	G	synonymous_variant	LOW	MPN008	p.Gly258Gly	gene
27677	p2_2_S2	2	10747	4.88238e-15	102	101	1	0.990099	C	T	synonymous_variant	LOW	MPN008	p.Val267Val	gene
27678	p2_2_S2	2	10753	6.856e-15	102	101	1	0.990099	C	T	synonymous_variant	LOW	MPN008	p.Ile269Ile	gene
27679	p2_2_S2	2	10777	0	95	94	1	1.06383	ACA	TCT	missense_variant	MODERATE	MPN008	p.GlnHis277HisLeu	gene
27680	p2_2_S2	2	10782	7.01421e-15	93	92	1	1.08696	A	T	missense_variant	MODERATE	MPN008	p.Gln279Leu	gene
27681	p2_2_S2	2	10786	0	90	89	1	1.1236	T	G	missense_variant	MODERATE	MPN008	p.Ser280Arg	gene
27682	p2_2_S2	2	10847	2.71688e-16	69	68	1	1.47059	A	G	missense_variant	MODERATE	MPN008	p.Ile301Val	gene
27683	p2_2_S2	2	10851	0	77	76	1	1.31579	A	T	missense_variant	MODERATE	MPN008	p.Tyr302Phe	gene
27684	p2_2_S2	2	10857	7.30756e-15	75	74	1	1.35135	T	G	missense_variant	MODERATE	MPN008	p.Leu304Trp	gene
27685	p2_2_S2	2	10874	0	70	68	2	2.94118	G	T	stop_gained	HIGH	MPN008	p.Glu310*	gene
27686	p2_2_S2	2	10886	2.78986e-16	69	68	1	1.47059	A	T	stop_gained	HIGH	MPN008	p.Lys314*	gene
27687	p2_2_S2	2	10887	7.52627e-15	73	72	1	1.38889	AGAT	GGAC	missense_variant	MODERATE	MPN008	p.LysIle314ArgThr	gene
27688	p2_2_S2	2	10898	0	75	74	1	1.35135	CGATT	TGATC	missense_variant	MODERATE	MPN008	p.ArgLeu318TrpSer	gene
27689	p2_2_S2	2	10908	0	85	84	1	1.19048	A	T	missense_variant	MODERATE	MPN008	p.Lys321Met	gene
27690	p2_2_S2	2	10909	0	91	90	1	1.11111	G	T	missense_variant	MODERATE	MPN008	p.Lys321Asn	gene
27691	p2_2_S2	2	10913	0	95	93	2	2.15054	AAGAA	ATGTA	stop_gained	HIGH	MPN008	p.LysLys323*	gene
27692	p2_2_S2	2	10922	6.89367e-15	96	95	1	1.05263	TTCT	CTCC	missense_variant	MODERATE	MPN008	p.PhePhe326LeuLeu	gene
27693	p2_2_S2	2	10931	0	96	95	1	1.05263	G	A	missense_variant	MODERATE	MPN008	p.Val329Ile	gene
27694	p2_2_S2	2	10979	7.16183e-16	94	93	1	1.07527	T	C	missense_variant	MODERATE	MPN008	p.Ser345Pro	gene
27695	p2_2_S2	2	10987	3.38292e-15	88	87	1	1.14943	A	G	synonymous_variant	LOW	MPN008	p.Lys347Lys	gene
27696	p2_2_S2	2	10994	1.59764e-15	92	91	1	1.0989	C	G	missense_variant	MODERATE	MPN008	p.Gln350Glu	gene
27697	p2_2_S2	2	11002	1.23554e-14	93	90	3	3.33333	A	T	missense_variant	MODERATE	MPN008	p.Gln352His	gene
27698	p2_2_S2	2	11006	0	93	91	2	2.1978	CTTGT	CATGA	missense_variant	MODERATE	MPN008	p.LeuVal354HisAsp	gene
27699	p2_2_S2	2	11015	0	94	93	1	1.07527	TTAT	ATAC	missense_variant	MODERATE	MPN008	p.Leu357Ile	gene
27700	p2_2_S2	2	11051	6.87107e-15	102	101	1	0.990099	G	T	stop_gained	HIGH	MPN008	p.Glu369*	gene
27701	p2_2_S2	2	11074	0	91	90	1	1.11111	T	G	missense_variant	MODERATE	MPN008	p.Ile376Met	gene
27702	p2_2_S2	2	11102	5.00998e-15	93	92	1	1.08696	A	G	missense_variant	MODERATE	MPN008	p.Lys386Glu	gene
27703	p2_2_S2	2	11114	4.79174e-15	99	98	1	1.02041	GAA	AAG	missense_variant	MODERATE	MPN008	p.Glu390Lys	gene
27704	p2_2_S2	2	11133	3.06626e-15	99	97	2	2.06186	TTAAACAA	CTAAGCAA	missense_variant	MODERATE	MPN008	p.Ile396Thr	gene
27705	p2_2_S2	2	11150	0	104	103	1	0.970874	C	T	missense_variant	MODERATE	MPN008	p.Leu402Phe	gene
27706	p2_2_S2	2	11155	3.31511e-15	110	109	1	0.917431	C	T	synonymous_variant	LOW	MPN008	p.Phe403Phe	gene
27707	p2_2_S2	2	11160	0	104	103	1	0.970874	A	T	missense_variant	MODERATE	MPN008	p.Asp405Val	gene
27708	p2_2_S2	2	11184	0	109	108	1	0.925926	C	G	missense_variant	MODERATE	MPN008	p.Ala413Gly	gene
27709	p2_2_S2	2	11207	0	99	97	2	2.06186	G	C	missense_variant	MODERATE	MPN008	p.Val421Leu	gene
27710	p2_2_S2	2	11222	1.85355e-15	96	95	1	1.05263	A	C	missense_variant	MODERATE	MPN008	p.Thr426Pro	gene
27711	p2_2_S2	2	11233	0	116	115	1	0.869565	C	G	missense_variant	MODERATE	MPN008	p.Asp429Glu	gene
27712	p2_2_S2	2	11235	2.35102e-15	99	98	1	1.02041	T	C	missense_variant	MODERATE	MPN008	p.Leu430Pro	gene
27713	p2_2_S2	2	11280	2.25261e-15	96	95	1	1.05263	ATA	GTG	missense_variant	MODERATE	MPN009	p.Tyr3Cys	gene
27714	p2_2_S2	2	11289	7.01421e-15	93	92	1	1.08696	T	C	synonymous_variant	LOW	MPN009	p.Asp5Asp	gene
27715	p2_2_S2	2	11300	0	95	94	1	1.06383	A	C	missense_variant	MODERATE	MPN009	p.His9Pro	gene
27716	p2_2_S2	2	11310	4.54383e-17	100	99	1	1.0101	T	C	synonymous_variant	LOW	MPN009	p.Cys12Cys	gene
27717	p2_2_S2	2	11313	3.45825e-15	101	100	1	1	A	T	missense_variant	MODERATE	MPN009	p.Glu13Asp	gene
27718	p2_2_S2	2	11321	0	107	106	1	0.943396	T	C	missense_variant	MODERATE	MPN009	p.Leu16Pro	gene
27719	p2_2_S2	2	11325	6.8859e-15	102	101	1	0.990099	A	T	missense_variant	MODERATE	MPN009	p.Glu17Asp	gene
27720	p2_2_S2	2	11330	0	109	108	1	0.925926	A	G	missense_variant	MODERATE	MPN009	p.His19Arg	gene
27721	p2_2_S2	2	11367	5.24377e-15	97	96	1	1.04167	A	G	synonymous_variant	LOW	MPN009	p.Leu31Leu	gene
27722	p2_2_S2	2	11368	0	94	93	1	1.07527	A	T	stop_gained	HIGH	MPN009	p.Lys32*	gene
27723	p2_2_S2	2	11376	1.82342e-15	96	95	1	1.05263	T	A	missense_variant	MODERATE	MPN009	p.Asn34Lys	gene
27724	p2_2_S2	2	11380	0	87	86	1	1.16279	GTGGG	TTAGC	missense_variant	MODERATE	MPN009	p.ValGly36LeuAla	gene
27725	p2_2_S2	2	11392	0	86	85	1	1.17647	T	C	synonymous_variant	LOW	MPN009	p.Leu40Leu	gene
27726	p2_2_S2	2	11394	0	89	88	1	1.13636	A	T	missense_variant	MODERATE	MPN009	p.Leu40Phe	gene
27727	p2_2_S2	2	11450	3.46579e-15	90	89	1	1.1236	CAG	TAA	missense_variant	MODERATE	MPN009	p.AlaGly59ValArg	gene
27728	p2_2_S2	2	11472	0	86	85	1	1.17647	TGA	CAG	missense_variant	MODERATE	MPN009	p.Asp67Ser	gene
27729	p2_2_S2	2	11491	3.87238e-15	83	82	1	1.21951	TTAA	CTAT	stop_gained	HIGH	MPN009	p.Lys74*	gene
27730	p2_2_S2	2	11506	0	91	90	1	1.11111	G	C	missense_variant	MODERATE	MPN009	p.Ala78Pro	gene
27731	p2_2_S2	2	11513	8.85976e-15	82	78	4	5.12821	TAAAAAAATTAG	TAAAAAAAATTAG	frameshift_variant	HIGH	MPN009	p.Leu83fs	gene
27732	p2_2_S2	2	11525	8.63092e-16	85	84	1	1.19048	T	A	missense_variant	MODERATE	MPN009	p.Val84Glu	gene
27733	p2_2_S2	2	11531	0	86	85	1	1.17647	C	T	missense_variant	MODERATE	MPN009	p.Thr86Met	gene
27734	p2_2_S2	2	11562	0	89	88	1	1.13636	A	G	synonymous_variant	LOW	MPN009	p.Glu96Glu	gene
27735	p2_2_S2	2	11599	3.52982e-15	79	78	1	1.28205	A	T	missense_variant	MODERATE	MPN009	p.Thr109Ser	gene
27736	p2_2_S2	2	11600	0	77	76	1	1.31579	CCCA	TCCT	missense_variant	MODERATE	MPN009	p.ThrGln109IleLeu	gene
27737	p2_2_S2	2	11604	1.19081e-15	74	72	2	2.77778	A	G	synonymous_variant	LOW	MPN009	p.Gln110Gln	gene
27738	p2_2_S2	2	11618	1.17009e-16	78	77	1	1.2987	T	A	missense_variant	MODERATE	MPN009	p.Phe115Tyr	gene
27739	p2_2_S2	2	11619	1.38669e-15	78	76	2	2.63158	TTTGA	CTTGG	missense_variant	MODERATE	MPN009	p.Met117Val	gene
27740	p2_2_S2	2	11633	0	80	79	1	1.26582	A	G	missense_variant	MODERATE	MPN009	p.Gln120Arg	gene
27741	p2_2_S2	2	11676	0	85	84	1	1.19048	T	C	synonymous_variant	LOW	MPN009	p.Arg134Arg	gene
27742	p2_2_S2	2	11687	3.37161e-15	97	96	1	1.04167	AAA	GAG	missense_variant	MODERATE	MPN009	p.GluArg138GlyGly	gene
27743	p2_2_S2	2	11704	4.94241e-15	90	89	1	1.1236	TTGAA	CTGAC	missense_variant	MODERATE	MPN009	p.Lys145Thr	gene
27744	p2_2_S2	2	11724	0	85	83	2	2.40964	ACAA	CCAC	missense_variant	MODERATE	MPN009	p.LysGln150AsnHis	gene
27745	p2_2_S2	2	11732	0	81	80	1	1.25	T	G	missense_variant	MODERATE	MPN009	p.Val153Gly	gene
27746	p2_2_S2	2	11738	7.16442e-15	84	83	1	1.20482	T	A	missense_variant	MODERATE	MPN009	p.Phe155Tyr	gene
27747	p2_2_S2	2	11752	0	86	85	1	1.17647	G	A	missense_variant	MODERATE	MPN009	p.Glu160Lys	gene
27748	p2_2_S2	2	11766	7.30756e-15	84	83	1	1.20482	TGCTTT	AGGTTA	stop_gained	HIGH	MPN009	p.AlaLeu165*	gene
27749	p2_2_S2	2	11780	0	90	89	1	1.1236	T	A	missense_variant	MODERATE	MPN009	p.Leu169Gln	gene
27750	p2_2_S2	2	11791	3.08156e-15	85	84	1	1.19048	GAA	AAT	missense_variant	MODERATE	MPN009	p.Glu173Asn	gene
27751	p2_2_S2	2	11796	1.76315e-15	83	82	1	1.21951	A	G	synonymous_variant	LOW	MPN009	p.Val174Val	gene
27752	p2_2_S2	2	11805	0	80	79	1	1.26582	GGTT	AGTA	synonymous_variant	LOW	MPN009	p.179	gene
27753	p2_2_S2	2	11822	3.97785e-15	83	81	2	2.46914	CGG	TGA	missense_variant	MODERATE	MPN009	p.ProGly183LeuArg	gene
27754	p2_2_S2	2	11835	4.54383e-17	90	88	2	2.27273	CTTT	CCTA	missense_variant	MODERATE	MPN009	p.Phe188Leu	gene
27755	p2_2_S2	2	11841	0	91	90	1	1.11111	G	A	synonymous_variant	LOW	MPN009	p.Lys189Lys	gene
27756	p2_2_S2	2	11842	3.39798e-15	88	87	1	1.14943	A	G	missense_variant	MODERATE	MPN009	p.Asn190Asp	gene
27757	p2_2_S2	2	11848	3.38292e-15	88	87	1	1.14943	A	T	stop_gained	HIGH	MPN009	p.Lys192*	gene
27758	p2_2_S2	2	11865	5.24377e-15	97	96	1	1.04167	T	A	synonymous_variant	LOW	MPN009	p.Ala197Ala	gene
27759	p2_2_S2	2	11873	6.66012e-15	98	97	1	1.03093	T	A	missense_variant	MODERATE	MPN009	p.Val200Asp	gene
27760	p2_2_S2	2	11879	0	103	102	1	0.980392	C	T	missense_variant	MODERATE	MPN009	p.Pro202Leu	gene
27761	p2_2_S2	2	11891	5.80103e-16	98	97	1	1.03093	TTTT	ATTA	stop_gained	HIGH	MPN009	p.LeuLeu206*	gene
27762	p2_2_S2	2	11915	2.84801e-15	101	99	2	2.0202	ATT	GTC	missense_variant	MODERATE	MPN009	p.Tyr214Cys	gene
27763	p2_2_S2	2	11925	0	95	94	1	1.06383	A	C	synonymous_variant	LOW	MPN009	p.Pro217Pro	gene
27764	p2_2_S2	2	11932	1.75938e-15	92	91	1	1.0989	TTT	ACA	missense_variant	MODERATE	MPN009	p.Phe220Thr	gene
27765	p2_2_S2	2	11948	5.16819e-15	84	83	1	1.20482	A	T	missense_variant	MODERATE	MPN009	p.Asn225Ile	gene
27766	p2_2_S2	2	11954	1.88345e-15	83	82	1	1.21951	CGG	TGA	missense_variant	MODERATE	MPN009	p.ProGlu227LeuLys	gene
27767	p2_2_S2	2	11992	1.60494e-15	92	91	1	1.0989	A	G	missense_variant	MODERATE	MPN009	p.Ile240Val	gene
27768	p2_2_S2	2	11995	6.18243e-16	91	90	1	1.11111	AAGCA	TAACT	stop_gained	HIGH	MPN009	p.LysGln241*	gene
27769	p2_2_S2	2	12012	0	85	84	1	1.19048	T	C	synonymous_variant	LOW	MPN009	p.Ala246Ala	gene
27770	p2_2_S2	2	12033	0	94	92	2	2.17391	G	A	synonymous_variant	LOW	MPN009	p.Val253Val	gene
27771	p2_2_S2	2	12065	0	89	88	1	1.13636	T	A	upstream_gene_variant	MODIFIER	MPN010	c.-192T>A	intergenic
27772	p2_2_S2	2	12081	0	85	84	1	1.19048	AAGTTCT	GAGCTCC	upstream_gene_variant	MODIFIER	MPN010	c.-176_-170delAAGTTCTinsGAGCTCC	intergenic
27773	p2_2_S2	2	12129	0	91	90	1	1.11111	G	C	upstream_gene_variant	MODIFIER	MPN010	c.-128G>C	intergenic
27774	p2_2_S2	2	12131	0	91	90	1	1.11111	GTAG	ATAC	upstream_gene_variant	MODIFIER	MPN010	c.-126_-123delGTAGinsATAC	intergenic
27775	p2_2_S2	2	12140	0	81	80	1	1.25	A	G	upstream_gene_variant	MODIFIER	MPN010	c.-117A>G	intergenic
27776	p2_2_S2	2	12146	1.00977e-15	76	75	1	1.33333	A	T	upstream_gene_variant	MODIFIER	MPN010	c.-111A>T	intergenic
27777	p2_2_S2	2	12151	2.41553e-16	78	76	2	2.63158	ATA	TTT	upstream_gene_variant	MODIFIER	MPN010	c.-106_-104delATAinsTTT	intergenic
27778	p2_2_S2	2	12161	0	81	80	1	1.25	AAAAA	TAAAG	upstream_gene_variant	MODIFIER	MPN010	c.-96_-92delAAAAAinsTAAAG	intergenic
27779	p2_2_S2	2	12179	1.96114e-16	91	90	1	1.11111	A	T	upstream_gene_variant	MODIFIER	MPN010	c.-78A>T	intergenic
27780	p2_2_S2	2	12196	0	91	90	1	1.11111	TAAA	CAGT	upstream_gene_variant	MODIFIER	MPN010	c.-61_-58delTAAAinsCAGT	intergenic
27781	p2_2_S2	2	12209	0	90	89	1	1.1236	A	G	upstream_gene_variant	MODIFIER	MPN010	c.-48A>G	intergenic
27782	p2_2_S2	2	12215	3.38292e-15	88	87	1	1.14943	T	G	upstream_gene_variant	MODIFIER	MPN010	c.-42T>G	intergenic
27783	p2_2_S2	2	12240	0	77	76	1	1.31579	A	G	upstream_gene_variant	MODIFIER	MPN010	c.-17A>G	intergenic
27784	p2_2_S2	2	12256	7.30756e-15	75	74	1	1.35135	A	T	upstream_gene_variant	MODIFIER	MPN010	c.-1A>T	intergenic
27785	p2_2_S2	2	12280	0	77	76	1	1.31579	C	A	missense_variant	MODERATE	MPN010	p.Asn8Lys	gene
27786	p2_2_S2	2	12296	6.40421e-15	76	75	1	1.33333	TTGAA	CTGAT	missense_variant	MODERATE	MPN010	p.Asn15Ile	gene
27787	p2_2_S2	2	12305	2.78421e-15	81	80	1	1.25	TAT	CAC	missense_variant	MODERATE	MPN010	p.Tyr17His	gene
27788	p2_2_S2	2	12322	1.89876e-15	74	73	1	1.36986	T	G	stop_gained	HIGH	MPN010	p.Tyr22*	gene
27789	p2_2_S2	2	12328	7.59455e-15	66	65	1	1.53846	AAAA	TAAG	missense_variant	MODERATE	MPN010	p.Leu24Phe	gene
27790	p2_2_S2	2	12337	0	67	65	2	3.07692	AAA	TAG	missense_variant	MODERATE	MPN010	p.GluAsn27AspSer	gene
27791	p2_2_S2	2	12344	2.78986e-16	69	68	1	1.47059	T	A	missense_variant	MODERATE	MPN010	p.Tyr30Asn	gene
27792	p2_2_S2	2	12359	0	72	71	1	1.40845	G	A	missense_variant	MODERATE	MPN010	p.Glu35Lys	gene
27793	p2_2_S2	2	12392	2.79528e-15	67	66	1	1.51515	GTGAAA	TTGAGT	missense_variant	MODERATE	MPN010	p.ValLys46LeuSer	gene
27794	p2_2_S2	2	12430	0	81	80	1	1.25	ACT	TCC	missense_variant	MODERATE	MPN010	p.GlnLeu58HisPro	gene
27795	p2_2_S2	2	12453	5.53005e-15	79	78	1	1.28205	T	C	missense_variant	MODERATE	MPN010	p.Phe66Ser	gene
27796	p2_2_S2	2	12456	3.52982e-15	79	78	1	1.28205	T	C	missense_variant	MODERATE	MPN010	p.Val67Ala	gene
27797	p2_2_S2	2	12462	2.03083e-15	74	73	1	1.36986	AAA	GAT	missense_variant	MODERATE	MPN010	p.LysThr69ArgSer	gene
27798	p2_2_S2	2	12484	5.00998e-15	93	92	1	1.08696	A	C	missense_variant	MODERATE	MPN010	p.Gln76His	gene
27799	p2_2_S2	2	12489	1.61247e-15	92	91	1	1.0989	T	A	missense_variant	MODERATE	MPN010	p.Val78Glu	gene
27800	p2_2_S2	2	12492	0	95	94	1	1.06383	TTA	CTG	missense_variant	MODERATE	MPN010	p.ValMet79AlaVal	gene
27801	p2_2_S2	2	12499	1.60494e-15	92	91	1	1.0989	G	A	synonymous_variant	LOW	MPN010	p.Glu81Glu	gene
27802	p2_2_S2	2	12566	5.51475e-15	79	78	1	1.28205	C	G	missense_variant	MODERATE	MPN010	p.Gln104Glu	gene
27803	p2_2_S2	2	12577	0	88	87	1	1.14943	AGGA	TGGT	missense_variant	MODERATE	MPN010	p.Gln107His	gene
27804	p2_2_S2	2	12589	0	79	78	1	1.28205	GCA	ACT	missense_variant	MODERATE	MPN010	p.Gln112Leu	gene
27805	p2_2_S2	2	12612	0	87	86	1	1.16279	A	G	missense_variant	MODERATE	MPN010	p.Gln119Arg	gene
27806	p2_2_S2	2	12623	1.20541e-16	78	77	1	1.2987	A	T	stop_gained	HIGH	MPN010	p.Lys123*	gene
27807	p2_2_S2	2	12629	0	91	89	2	2.24719	C	T	synonymous_variant	LOW	MPN010	p.Leu125Leu	gene
27808	p2_2_S2	2	12636	0	100	99	1	1.0101	A	T	missense_variant	MODERATE	MPN010	p.Asn127Ile	gene
27809	p2_2_S2	2	12644	1.82342e-15	96	95	1	1.05263	T	C	missense_variant	MODERATE	MPN010	p.Ser130Pro	gene
27810	p2_2_S2	2	12652	0	95	93	2	2.15054	AAAAACT	GAAAGCT	upstream_gene_variant	MODIFIER	MPN013	c.-2340_-2336delAAAAAinsGAAAG	intergenic
27811	p2_2_S2	2	12668	0	95	94	1	1.06383	TTTA	ATTT	upstream_gene_variant	MODIFIER	MPN013	c.-2324_-2321delTTTAinsATTT	intergenic
27812	p2_2_S2	2	12673	0	95	94	1	1.06383	A	T	upstream_gene_variant	MODIFIER	MPN013	c.-2319A>T	intergenic
27813	p2_2_S2	2	12675	0	89	88	1	1.13636	C	G	upstream_gene_variant	MODIFIER	MPN013	c.-2317C>G	intergenic
27814	p2_2_S2	2	12700	0	85	84	1	1.19048	C	T	upstream_gene_variant	MODIFIER	MPN013	c.-2292C>T	intergenic
27815	p2_2_S2	2	12701	8.79972e-15	89	88	1	1.13636	T	C	upstream_gene_variant	MODIFIER	MPN013	c.-2291T>C	intergenic
27816	p2_2_S2	2	12725	0	85	84	1	1.19048	A	G	upstream_gene_variant	MODIFIER	MPN013	c.-2267A>G	intergenic
27817	p2_2_S2	2	12741	0	89	88	1	1.13636	A	G	upstream_gene_variant	MODIFIER	MPN013	c.-2251A>G	intergenic
27818	p2_2_S2	2	12755	0	89	88	1	1.13636	A	G	upstream_gene_variant	MODIFIER	MPN013	c.-2237A>G	intergenic
27819	p2_2_S2	2	12760	2.67497e-15	88	86	2	2.32558	C	T	upstream_gene_variant	MODIFIER	MPN013	c.-2232C>T	intergenic
27820	p2_2_S2	2	12763	4.91228e-15	85	82	3	3.65854	G	A	upstream_gene_variant	MODIFIER	MPN013	c.-2229G>A	intergenic
27821	p2_2_S2	2	12791	0	76	75	1	1.33333	T	C	upstream_gene_variant	MODIFIER	MPN013	c.-2201T>C	intergenic
27822	p2_2_S2	2	12793	0	78	77	1	1.2987	TTG	ATA	upstream_gene_variant	MODIFIER	MPN013	c.-2199_-2197delTTGinsATA	intergenic
27823	p2_2_S2	2	12803	0	81	80	1	1.25	A	G	upstream_gene_variant	MODIFIER	MPN013	c.-2189A>G	intergenic
27824	p2_2_S2	2	12818	5.16819e-15	84	83	1	1.20482	T	A	upstream_gene_variant	MODIFIER	MPN013	c.-2174T>A	intergenic
27825	p2_2_S2	2	12842	0	89	88	1	1.13636	TCA	TA	frameshift_variant	HIGH	MPN011	p.Glu231fs	gene
27826	p2_2_S2	2	12888	6.65235e-15	98	97	1	1.03093	C	T	missense_variant	MODERATE	MPN011	p.Asp216Asn	gene
27827	p2_2_S2	2	12889	0	100	99	1	1.0101	A	T	synonymous_variant	LOW	MPN011	p.Val215Val	gene
27828	p2_2_S2	2	12924	1.62e-15	92	91	1	1.0989	T	C	missense_variant	MODERATE	MPN011	p.Lys204Glu	gene
27829	p2_2_S2	2	12940	0	95	94	1	1.06383	A	G	synonymous_variant	LOW	MPN011	p.Ser198Ser	gene
27830	p2_2_S2	2	12944	5.24377e-15	97	96	1	1.04167	A	G	missense_variant	MODERATE	MPN011	p.Leu197Pro	gene
27831	p2_2_S2	2	12966	0	93	92	1	1.08696	TTCAA	CTCAG	missense_variant	MODERATE	MPN011	p.Ile190Val	gene
27832	p2_2_S2	2	12980	0	89	88	1	1.13636	A	G	missense_variant	MODERATE	MPN011	p.Val185Ala	gene
27833	p2_2_S2	2	12996	0	95	94	1	1.06383	T	C	missense_variant	MODERATE	MPN011	p.Arg180Gly	gene
27834	p2_2_S2	2	13016	0	95	94	1	1.06383	T	C	missense_variant	MODERATE	MPN011	p.Asn173Ser	gene
27835	p2_2_S2	2	13021	1.83848e-15	96	95	1	1.05263	T	A	synonymous_variant	LOW	MPN011	p.Ser171Ser	gene
27836	p2_2_S2	2	13033	0	99	97	2	2.06186	T	A	missense_variant	MODERATE	MPN011	p.Leu167Phe	gene
27837	p2_2_S2	2	13068	3.75984e-15	83	82	1	1.21951	T	C	missense_variant	MODERATE	MPN011	p.Asn156Asp	gene
27838	p2_2_S2	2	13081	0	85	84	1	1.19048	G	C	missense_variant	MODERATE	MPN011	p.Asp151Glu	gene
27839	p2_2_S2	2	13087	3.29981e-15	85	84	1	1.19048	TTTGT	ATTGA	missense_variant	MODERATE	MPN011	p.HisLys148LeuAsn	gene
27840	p2_2_S2	2	13117	0	77	76	1	1.31579	A	G	synonymous_variant	LOW	MPN011	p.Asn139Asn	gene
27841	p2_2_S2	2	13123	0	76	75	1	1.33333	A	T	missense_variant	MODERATE	MPN011	p.Asn137Lys	gene
27842	p2_2_S2	2	13137	0	76	75	1	1.33333	T	A	missense_variant	MODERATE	MPN011	p.Thr133Ser	gene
27843	p2_2_S2	2	13138	3.90275e-15	74	73	1	1.36986	A	T	missense_variant	MODERATE	MPN011	p.His132Gln	gene
27844	p2_2_S2	2	13172	0	75	74	1	1.35135	A	G	missense_variant	MODERATE	MPN011	p.Ile121Thr	gene
27845	p2_2_S2	2	13192	1.00977e-15	76	75	1	1.33333	G	A	synonymous_variant	LOW	MPN011	p.Phe114Phe	gene
27846	p2_2_S2	2	13193	0	74	73	1	1.36986	AAA	GAT	stop_gained	HIGH	MPN011	p.TyrPhe113*	gene
27847	p2_2_S2	2	13213	2.27521e-15	69	68	1	1.47059	C	T	synonymous_variant	LOW	MPN011	p.Lys107Lys	gene
27848	p2_2_S2	2	13227	0	71	70	1	1.42857	T	A	missense_variant	MODERATE	MPN011	p.Asn103Tyr	gene
27849	p2_2_S2	2	13235	2.93842e-15	63	62	1	1.6129	G	A	missense_variant	MODERATE	MPN011	p.Ser100Leu	gene
27850	p2_2_S2	2	13237	4.14595e-16	60	59	1	1.69492	A	T	missense_variant	MODERATE	MPN011	p.Phe99Leu	gene
27851	p2_2_S2	2	13272	0	65	64	1	1.5625	CGA	TGT	missense_variant	MODERATE	MPN011	p.IleGly87AsnSer	gene
27852	p2_2_S2	2	13279	0	71	70	1	1.42857	A	T	missense_variant	MODERATE	MPN011	p.Asn85Lys	gene
27853	p2_2_S2	2	13284	0	71	70	1	1.42857	T	A	stop_gained	HIGH	MPN011	p.Lys84*	gene
27854	p2_2_S2	2	13323	0	72	71	1	1.40845	T	A	missense_variant	MODERATE	MPN011	p.Thr71Ser	gene
27855	p2_2_S2	2	13332	3.68403e-15	70	69	1	1.44928	C	T	missense_variant	MODERATE	MPN011	p.Glu68Lys	gene
27856	p2_2_S2	2	13370	0	76	74	2	2.7027	AAG	ACTGAG	conservative_inframe_insertion	MODERATE	MPN011	p.Leu55delinsSerVal	gene
27857	p2_2_S2	2	13384	4.89698e-16	73	72	1	1.38889	T	C	synonymous_variant	LOW	MPN011	p.Glu50Glu	gene
27858	p2_2_S2	2	13409	0	73	72	1	1.38889	A	T	missense_variant	MODERATE	MPN011	p.Val42Asp	gene
27859	p2_2_S2	2	13467	0	65	64	1	1.5625	T	G	missense_variant	MODERATE	MPN011	p.Thr23Pro	gene
27860	p2_2_S2	2	13478	4.89698e-16	73	72	1	1.38889	G	A	missense_variant	MODERATE	MPN011	p.Ala19Val	gene
27861	p2_2_S2	2	13493	1.27345e-15	74	73	1	1.36986	ACTGA	GCTGC	missense_variant	MODERATE	MPN011	p.SerVal13AlaAla	gene
27862	p2_2_S2	2	13498	0	77	76	1	1.31579	A	G	synonymous_variant	LOW	MPN011	p.Ser12Ser	gene
27863	p2_2_S2	2	13523	2.79528e-15	72	71	1	1.40845	T	C	missense_variant	MODERATE	MPN011	p.Lys4Arg	gene
27864	p2_2_S2	2	13527	0	68	67	1	1.49254	A	T	missense_variant	MODERATE	MPN011	p.Phe3Ile	gene
27865	p2_2_S2	2	13529	2.29004e-15	72	70	2	2.85714	TTCATTAGCGC	ATCAATAGAGT	initiator_codon_variant	LOW	MPN011	p.MetLys1?	gene
27866	p2_2_S2	2	13546	1.0552e-15	83	81	2	2.46914	T	A	upstream_gene_variant	MODIFIER	MPN011	c.-13A>T	intergenic
27867	p2_2_S2	2	13555	1.01753e-15	76	75	1	1.33333	T	A	upstream_gene_variant	MODIFIER	MPN011	c.-22A>T	intergenic
27868	p2_2_S2	2	13557	0	77	76	1	1.31579	A	T	upstream_gene_variant	MODIFIER	MPN011	c.-24T>A	intergenic
27869	p2_2_S2	2	13604	7.17195e-15	84	83	1	1.20482	T	G	missense_variant	MODERATE	MPN012	p.Gln221Pro	gene
27870	p2_2_S2	2	13615	0	93	92	1	1.08696	C	T	missense_variant	MODERATE	MPN012	p.Met217Ile	gene
27871	p2_2_S2	2	13654	1.89122e-15	74	73	1	1.36986	T	C	synonymous_variant	LOW	MPN012	p.Lys204Lys	gene
27872	p2_2_S2	2	13655	7.30756e-15	75	74	1	1.35135	T	C	missense_variant	MODERATE	MPN012	p.Lys204Arg	gene
27873	p2_2_S2	2	13680	0	80	79	1	1.26582	A	G	missense_variant	MODERATE	MPN012	p.Trp196Arg	gene
27874	p2_2_S2	2	13715	0	84	83	1	1.20482	TCAAC	ACAAT	missense_variant	MODERATE	MPN012	p.ValAsp183IleVal	gene
27875	p2_2_S2	2	13752	0	77	76	1	1.31579	T	A	missense_variant	MODERATE	MPN012	p.Thr172Ser	gene
27876	p2_2_S2	2	13769	5.53005e-15	79	78	1	1.28205	G	A	missense_variant	MODERATE	MPN012	p.Ser166Leu	gene
27877	p2_2_S2	2	13787	0	84	83	1	1.20482	AGA	TGT	missense_variant	MODERATE	MPN012	p.Leu160His	gene
27878	p2_2_S2	2	13813	1.89122e-15	74	73	1	1.36986	A	C	synonymous_variant	LOW	MPN012	p.Gly151Gly	gene
27879	p2_2_S2	2	13863	0	68	67	1	1.49254	A	G	missense_variant	MODERATE	MPN012	p.Phe135Leu	gene
27880	p2_2_S2	2	13871	2.78045e-15	72	71	1	1.40845	T	C	missense_variant	MODERATE	MPN012	p.Asn132Ser	gene
27881	p2_2_S2	2	13872	0	76	75	1	1.33333	T	C	missense_variant	MODERATE	MPN012	p.Asn132Asp	gene
27882	p2_2_S2	2	13886	3.83471e-15	61	60	1	1.66667	A	T	missense_variant	MODERATE	MPN012	p.Ile127Lys	gene
27883	p2_2_S2	2	13909	3.88768e-15	74	73	1	1.36986	A	G	synonymous_variant	LOW	MPN012	p.Tyr119Tyr	gene
27884	p2_2_S2	2	13964	3.52629e-15	79	78	1	1.28205	G	T	missense_variant	MODERATE	MPN012	p.Thr101Lys	gene
27885	p2_2_S2	2	13993	0	71	70	1	1.42857	A	T	synonymous_variant	LOW	MPN012	p.Ile91Ile	gene
27886	p2_2_S2	2	14008	0	93	92	1	1.08696	TATT	AATC	synonymous_variant	LOW	MPN012	p.87	gene
27887	p2_2_S2	2	14026	0	81	80	1	1.25	A	G	synonymous_variant	LOW	MPN012	p.Ser80Ser	gene
27888	p2_2_S2	2	14050	0	86	85	1	1.17647	T	A	synonymous_variant	LOW	MPN012	p.Leu72Leu	gene
27889	p2_2_S2	2	14058	1.13163e-14	89	87	2	2.29885	T	C	missense_variant	MODERATE	MPN012	p.Thr70Ala	gene
27890	p2_2_S2	2	14075	3.0891e-15	106	105	1	0.952381	A	G	missense_variant	MODERATE	MPN012	p.Val64Ala	gene
27891	p2_2_S2	2	14105	2.81812e-15	94	93	1	1.07527	AAGTT	GAGTA	missense_variant	MODERATE	MPN012	p.AsnLeu53TyrSer	gene
27892	p2_2_S2	2	14141	4.1742e-15	102	100	2	2	T	C	missense_variant	MODERATE	MPN012	p.Tyr42Cys	gene
27893	p2_2_S2	2	14148	0	93	91	2	2.1978	CAACG	TATCT	missense_variant	MODERATE	MPN012	p.AspValAsp38GluAspAsn	gene
27894	p2_2_S2	2	14226	4.42258e-15	86	85	1	1.17647	TTGAAGA	CTAGAGG	missense_variant	MODERATE	MPN012	p.SerSerThr12ProLeuAla	gene
27895	p2_2_S2	2	14243	7.14982e-15	84	83	1	1.20482	A	G	missense_variant	MODERATE	MPN012	p.Ile8Thr	gene
27896	p2_2_S2	2	14250	2.41129e-15	91	90	1	1.11111	GG	CT	stop_gained	HIGH	MPN012	p.TyrLeu5*	gene
27897	p2_2_S2	2	14286	6.7955e-15	89	88	1	1.13636	T	A	upstream_gene_variant	MODIFIER	MPN011	c.-753A>T	intergenic
27898	p2_2_S2	2	14314	0	87	86	1	1.16279	T	A	upstream_gene_variant	MODIFIER	MPN011	c.-781A>T	intergenic
27899	p2_2_S2	2	14332	0	89	88	1	1.13636	T	C	upstream_gene_variant	MODIFIER	MPN011	c.-799A>G	intergenic
27900	p2_2_S2	2	14335	0	87	86	1	1.16279	T	C	upstream_gene_variant	MODIFIER	MPN011	c.-802A>G	intergenic
27901	p2_2_S2	2	14375	2.80281e-15	67	66	1	1.51515	ATAA	GTAT	upstream_gene_variant	MODIFIER	MPN011	c.-845_-842delTTATinsATAC	intergenic
27902	p2_2_S2	2	14415	0	84	83	1	1.20482	AAAA	TAAT	upstream_gene_variant	MODIFIER	MPN011	c.-885_-882delTTTTinsATTA	intergenic
27903	p2_2_S2	2	14436	2.50146e-15	85	84	1	1.19048	AAAA	TAAT	upstream_gene_variant	MODIFIER	MPN011	c.-906_-903delTTTTinsATTA	intergenic
27904	p2_2_S2	2	14442	3.7443e-15	83	82	1	1.21951	T	A	upstream_gene_variant	MODIFIER	MPN011	c.-909A>T	intergenic
27905	p2_2_S2	2	14454	0	93	92	1	1.08696	TTAGT	GTAGA	upstream_gene_variant	MODIFIER	MPN011	c.-925_-921delACTAAinsTCTAC	intergenic
27906	p2_2_S2	2	14460	0	93	92	1	1.08696	T	A	upstream_gene_variant	MODIFIER	MPN011	c.-927A>T	intergenic
27907	p2_2_S2	2	14469	5.34924e-15	85	83	2	2.40964	AGTAA	TGTTA	upstream_gene_variant	MODIFIER	MPN011	c.-939_-936delTACTinsAACA	intergenic
27908	p2_2_S2	2	14477	1.24543e-16	78	77	1	1.2987	T	A	upstream_gene_variant	MODIFIER	MPN011	c.-944A>T	intergenic
27909	p2_2_S2	2	14499	1.20564e-15	89	88	1	1.13636	AGTTG	GGTTA	upstream_gene_variant	MODIFIER	MPN011	c.-970_-966delCAACTinsTAACC	intergenic
27910	p2_2_S2	2	14540	1.89876e-15	74	73	1	1.36986	T	A	upstream_gene_variant	MODIFIER	MPN011	c.-1007A>T	intergenic
27911	p2_2_S2	2	14561	1.37892e-15	71	70	1	1.42857	T	A	upstream_gene_variant	MODIFIER	MPN011	c.-1028A>T	intergenic
27912	p2_2_S2	2	14568	0	79	78	1	1.28205	G	A	upstream_gene_variant	MODIFIER	MPN011	c.-1035C>T	intergenic
27913	p2_2_S2	2	14670	7.30756e-15	75	74	1	1.35135	G	C	upstream_gene_variant	MODIFIER	MPN011	c.-1137C>G	intergenic
27914	p2_2_S2	2	14745	3.97032e-15	52	51	1	1.96078	A	T	upstream_gene_variant	MODIFIER	MPN011	c.-1212T>A	intergenic
27915	p2_2_S2	2	14746	0	53	52	1	1.92308	AAATT	GAATC	upstream_gene_variant	MODIFIER	MPN011	c.-1217_-1213delAATTTinsGATTC	intergenic
27916	p2_2_S2	2	14776	0	70	68	2	2.94118	G	A	upstream_gene_variant	MODIFIER	MPN011	c.-1243C>T	intergenic
27917	p2_2_S2	2	14781	0	77	76	1	1.31579	T	G	upstream_gene_variant	MODIFIER	MPN011	c.-1248A>C	intergenic
27918	p2_2_S2	2	14783	5.46225e-15	66	65	1	1.53846	T	C	upstream_gene_variant	MODIFIER	MPN011	c.-1250A>G	intergenic
27919	p2_2_S2	2	14852	3.90275e-15	74	73	1	1.36986	C	T	upstream_gene_variant	MODIFIER	MPN011	c.-1319G>A	intergenic
27920	p2_2_S2	2	14853	7.3982e-15	75	73	2	2.73973	TGGTC	TGATT	upstream_gene_variant	MODIFIER	MPN011	c.-1324_-1322delGACinsAAT	intergenic
27921	p2_2_S2	2	14910	2.63919e-16	69	68	1	1.47059	C	T	upstream_gene_variant	MODIFIER	MPN011	c.-1377G>A	intergenic
27922	p2_2_S2	2	14912	0	72	71	1	1.40845	ACGA	TCGT	upstream_gene_variant	MODIFIER	MPN011	c.-1382_-1379delTCGTinsACGA	intergenic
27923	p2_2_S2	2	14919	0	81	80	1	1.25	T	C	upstream_gene_variant	MODIFIER	MPN011	c.-1386A>G	intergenic
27924	p2_2_S2	2	14927	0	76	75	1	1.33333	C	G	upstream_gene_variant	MODIFIER	MPN011	c.-1394G>C	intergenic
27925	p2_2_S2	2	14938	2.117e-15	78	77	1	1.2987	C	A	upstream_gene_variant	MODIFIER	MPN011	c.-1405G>T	intergenic
27926	p2_2_S2	2	14950	1.05709e-16	78	77	1	1.2987	T	A	upstream_gene_variant	MODIFIER	MPN011	c.-1417A>T	intergenic
27927	p2_2_S2	2	14985	0	84	83	1	1.20482	TTTA	CTTG	upstream_gene_variant	MODIFIER	MPN011	c.-1455_-1452delTAAAinsCAAG	intergenic
27928	p2_2_S2	2	15004	0	89	88	1	1.13636	A	T	missense_variant	MODERATE	MPN013	p.Ile5Phe	gene
27929	p2_2_S2	2	15034	3.45825e-15	101	100	1	1	C	A	synonymous_variant	LOW	MPN013	p.Arg15Arg	gene
27930	p2_2_S2	2	15037	3.44295e-15	101	100	1	1	A	G	missense_variant	MODERATE	MPN013	p.Thr16Ala	gene
27931	p2_2_S2	2	15038	5.08556e-15	106	105	1	0.952381	C	A	missense_variant	MODERATE	MPN013	p.Thr16Lys	gene
27932	p2_2_S2	2	15063	0	101	99	2	2.0202	T	A	synonymous_variant	LOW	MPN013	p.Ile24Ile	gene
27933	p2_2_S2	2	15065	0	104	103	1	0.970874	T	C	missense_variant	MODERATE	MPN013	p.Val25Ala	gene
27934	p2_2_S2	2	15070	1.44696e-15	101	100	1	1	A	G	missense_variant	MODERATE	MPN013	p.Thr27Ala	gene
27935	p2_2_S2	2	15077	0	94	93	1	1.07527	A	T	missense_variant	MODERATE	MPN013	p.Gln29Leu	gene
27936	p2_2_S2	2	15119	0	94	93	1	1.07527	AAGA	GAGG	missense_variant	MODERATE	MPN013	p.LysAsp43ArgGly	gene
27937	p2_2_S2	2	15150	1.95879e-15	87	86	1	1.16279	A	G	synonymous_variant	LOW	MPN013	p.Thr53Thr	gene
27938	p2_2_S2	2	15159	1.62e-15	92	91	1	1.0989	A	C	synonymous_variant	LOW	MPN013	p.Thr56Thr	gene
27939	p2_2_S2	2	15168	0	85	84	1	1.19048	A	C	missense_variant	MODERATE	MPN013	p.Gln59His	gene
27940	p2_2_S2	2	15192	0	87	85	2	2.35294	AGGCCCAAAGG	TGGCTCAAGGA	missense_variant	MODERATE	MPN013	p.LysGlyProLysGlu67AsnGlySerArgLys	gene
27941	p2_2_S2	2	15216	7.17195e-15	84	83	1	1.20482	T	C	synonymous_variant	LOW	MPN013	p.Pro75Pro	gene
27942	p2_2_S2	2	15230	0	85	84	1	1.19048	G	A	missense_variant	MODERATE	MPN013	p.Gly80Asp	gene
27943	p2_2_S2	2	15240	7.16442e-15	84	83	1	1.20482	A	G	synonymous_variant	LOW	MPN013	p.Lys83Lys	gene
27944	p2_2_S2	2	15260	2.75761e-15	88	87	1	1.14943	CTGATAC	TTAATAT	missense_variant	MODERATE	MPN013	p.ProAspThr90LeuAsnMet	gene
27945	p2_2_S2	2	15296	1.61247e-15	92	91	1	1.0989	A	G	missense_variant	MODERATE	MPN013	p.Gln102Arg	gene
27946	p2_2_S2	2	15311	3.75207e-15	83	82	1	1.21951	A	G	missense_variant	MODERATE	MPN013	p.Asp107Gly	gene
27947	p2_2_S2	2	15353	1.89876e-15	74	73	1	1.36986	T	C	missense_variant	MODERATE	MPN013	p.Val121Ala	gene
27948	p2_2_S2	2	15365	2.24884e-15	78	77	1	1.2987	AT	TA	missense_variant	MODERATE	MPN013	p.Asp125Val	gene
27949	p2_2_S2	2	15384	0	87	86	1	1.16279	TGAG	AGAC	missense_variant	MODERATE	MPN013	p.Glu132Asp	gene
27950	p2_2_S2	2	15437	3.75207e-15	83	82	1	1.21951	T	C	missense_variant	MODERATE	MPN013	p.Val149Ala	gene
27951	p2_2_S2	2	15459	1.96114e-16	91	90	1	1.11111	A	T	missense_variant	MODERATE	MPN013	p.Leu156Phe	gene
27952	p2_2_S2	2	15479	0	81	80	1	1.25	A	G	missense_variant	MODERATE	MPN013	p.Gln163Arg	gene
27953	p2_2_S2	2	15484	4.49039e-15	87	85	2	2.35294	G	A	missense_variant	MODERATE	MPN013	p.Glu165Lys	gene
27954	p2_2_S2	2	15539	5.31157e-15	75	74	1	1.35135	A	T	missense_variant	MODERATE	MPN013	p.Gln183Leu	gene
27955	p2_2_S2	2	15540	0	73	72	1	1.38889	A	G	synonymous_variant	LOW	MPN013	p.Gln183Gln	gene
27956	p2_2_S2	2	15550	3.90275e-15	74	73	1	1.36986	A	T	missense_variant	MODERATE	MPN013	p.Thr187Ser	gene
27957	p2_2_S2	2	15560	0	80	79	1	1.26582	T	C	missense_variant	MODERATE	MPN013	p.Val190Ala	gene
27958	p2_2_S2	2	15573	3.61646e-15	92	91	1	1.0989	G	A	synonymous_variant	LOW	MPN013	p.Gln194Gln	gene
27959	p2_2_S2	2	15575	5.02529e-15	93	92	1	1.08696	T	C	missense_variant	MODERATE	MPN013	p.Ile195Thr	gene
27960	p2_2_S2	2	15669	0	98	97	1	1.03093	T	A	synonymous_variant	LOW	MPN013	p.Leu226Leu	gene
27961	p2_2_S2	2	15693	2.95372e-15	115	114	1	0.877193	T	A	synonymous_variant	LOW	MPN013	p.Gly234Gly	gene
27962	p2_2_S2	2	15697	0	110	109	1	0.917431	ACCCTACAGT	GCCCAGCAGA	missense_variant	MODERATE	MPN013	p.ThrLeuGlnLeu236AlaGlnGlnIle	gene
27963	p2_2_S2	2	15711	0	108	107	1	0.934579	TTTA	ATTT	missense_variant	MODERATE	MPN013	p.Leu241Phe	gene
27964	p2_2_S2	2	15716	0	102	101	1	0.990099	AGAC	TGAT	missense_variant	MODERATE	MPN013	p.LysThr242MetMet	gene
27965	p2_2_S2	2	15727	0	90	89	1	1.1236	A	G	missense_variant	MODERATE	MPN013	p.Lys246Glu	gene
27966	p2_2_S2	2	15746	8.66388e-17	94	93	1	1.07527	AAAAA	TAAAG	missense_variant	MODERATE	MPN013	p.Glu252Val	gene
27967	p2_2_S2	2	15774	0	87	86	1	1.16279	C	T	upstream_gene_variant	MODIFIER	MPN011	c.-2241G>A	intergenic
27968	p2_2_S2	2	15804	0	123	122	1	0.819672	TAG	AAA	upstream_gene_variant	MODIFIER	MPN011	c.-2273_-2271delCTAinsTTT	intergenic
27969	p2_2_S2	2	15808	0	103	102	1	0.980392	T	C	upstream_gene_variant	MODIFIER	MPN011	c.-2275A>G	intergenic
27970	p2_2_S2	2	15811	1.47663e-15	101	100	1	1	T	A	upstream_gene_variant	MODIFIER	MPN011	c.-2278A>T	intergenic
27971	p2_2_S2	2	15815	1.77821e-15	96	93	3	3.22581	TTG	ATA	upstream_gene_variant	MODIFIER	MPN011	c.-2284_-2282delCAAinsTAT	intergenic
27972	p2_2_S2	2	15837	7.02174e-15	93	92	1	1.08696	T	C	upstream_gene_variant	MODIFIER	MPN011	c.-2304A>G	intergenic
27973	p2_2_S2	2	15838	0	95	94	1	1.06383	A	T	upstream_gene_variant	MODIFIER	MPN011	c.-2305T>A	intergenic
27974	p2_2_S2	2	15840	0	91	90	1	1.11111	T	A	upstream_gene_variant	MODIFIER	MPN011	c.-2307A>T	intergenic
27975	p2_2_S2	2	15843	6.94641e-15	80	79	1	1.26582	T	C	upstream_gene_variant	MODIFIER	MPN011	c.-2310A>G	intergenic
27976	p2_2_S2	2	15874	0	86	85	1	1.17647	T	C	missense_variant	MODERATE	MPN014	p.Leu3Pro	gene
27977	p2_2_S2	2	15918	0	86	85	1	1.17647	A	G	missense_variant	MODERATE	MPN014	p.Asn18Asp	gene
27978	p2_2_S2	2	15940	0	91	90	1	1.11111	T	G	missense_variant	MODERATE	MPN014	p.Met25Arg	gene
27979	p2_2_S2	2	15953	0	79	78	1	1.28205	TAAAA	CAAAG	missense_variant	MODERATE	MPN014	p.Arg31Gly	gene
27980	p2_2_S2	2	16045	5.02529e-15	93	92	1	1.08696	A	G	missense_variant	MODERATE	MPN014	p.Asn60Ser	gene
27981	p2_2_S2	2	16054	8.51791e-16	89	87	2	2.29885	A	G	missense_variant	MODERATE	MPN014	p.Asn63Ser	gene
27982	p2_2_S2	2	16084	5.16819e-15	84	83	1	1.20482	T	A	missense_variant	MODERATE	MPN014	p.Val73Glu	gene
27983	p2_2_S2	2	16089	0	81	80	1	1.25	TTTGA	GTTGT	missense_variant	MODERATE	MPN014	p.PheGlu75ValVal	gene
27984	p2_2_S2	2	16119	0	89	88	1	1.13636	A	T	missense_variant	MODERATE	MPN014	p.Asn85Tyr	gene
27985	p2_2_S2	2	16180	0	68	67	1	1.49254	A	G	missense_variant	MODERATE	MPN014	p.Asn105Ser	gene
27986	p2_2_S2	2	16193	0	71	70	1	1.42857	AGTTG	GGATA	missense_variant	MODERATE	MPN014	p.ValGlu110AspLys	gene
27987	p2_2_S2	2	16205	2.71688e-16	69	68	1	1.47059	T	C	synonymous_variant	LOW	MPN014	p.Asp113Asp	gene
27988	p2_2_S2	2	16230	3.75207e-15	73	71	2	2.8169	GGTG	AGGG	missense_variant	MODERATE	MPN014	p.Gly122Arg	gene
27989	p2_2_S2	2	16286	1.61247e-15	92	91	1	1.0989	G	A	missense_variant	MODERATE	MPN014	p.Met140Ile	gene
27990	p2_2_S2	2	16324	0	90	89	1	1.1236	T	C	missense_variant	MODERATE	MPN014	p.Leu153Pro	gene
27991	p2_2_S2	2	16330	0	95	94	1	1.06383	T	C	missense_variant	MODERATE	MPN014	p.Leu155Ser	gene
27992	p2_2_S2	2	16336	0	90	89	1	1.1236	A	G	missense_variant	MODERATE	MPN014	p.Asn157Ser	gene
27993	p2_2_S2	2	16347	0	96	94	2	2.12766	GGT	AGA	missense_variant	MODERATE	MPN014	p.Gly161Arg	gene
27994	p2_2_S2	2	16386	1.59764e-15	92	91	1	1.0989	A	G	missense_variant	MODERATE	MPN014	p.Asn174Asp	gene
27995	p2_2_S2	2	16429	0	93	92	1	1.08696	TTAA	CTAT	missense_variant	MODERATE	MPN014	p.ValLys188AlaMet	gene
27996	p2_2_S2	2	16445	0	88	86	2	2.32558	ATTATTA	GTTGTTG	synonymous_variant	LOW	MPN014	p.196	gene
27997	p2_2_S2	2	16459	0	84	83	1	1.20482	A	T	missense_variant	MODERATE	MPN014	p.Tyr198Phe	gene
27998	p2_2_S2	2	16463	0	86	85	1	1.17647	GAAAA	AAAAT	missense_variant	MODERATE	MPN014	p.Asn201Tyr	gene
27999	p2_2_S2	2	16503	8.63092e-16	85	84	1	1.19048	T	A	missense_variant	MODERATE	MPN015	p.Leu279Phe	gene
28000	p2_2_S2	2	16510	1.97409e-15	87	86	1	1.16279	T	G	missense_variant	MODERATE	MPN015	p.His277Pro	gene
28001	p2_2_S2	2	16513	0	87	86	1	1.16279	T	C	missense_variant	MODERATE	MPN015	p.Lys276Arg	gene
28002	p2_2_S2	2	16530	0	94	93	1	1.07527	C	T	synonymous_variant	LOW	MPN015	p.Ser270Ser	gene
28003	p2_2_S2	2	16537	0	98	97	1	1.03093	ATAATTA	GTAGTTT	missense_variant	MODERATE	MPN015	p.ValIleIle266GluThrThr	gene
28004	p2_2_S2	2	16558	4.54383e-17	100	99	1	1.0101	A	G	missense_variant	MODERATE	MPN015	p.Leu261Ser	gene
28005	p2_2_S2	2	16590	1.0964e-15	106	105	1	0.952381	AC	TG	missense_variant	MODERATE	MPN015	p.Gly250Ala	gene
28006	p2_2_S2	2	16624	0	114	113	1	0.884956	C	T	missense_variant	MODERATE	MPN015	p.Arg239Gln	gene
28007	p2_2_S2	2	16636	0	104	102	2	1.96078	TTTAAGAA	CTTGAGAG	missense_variant	MODERATE	MPN015	p.PheLeuAsn233LeuSerSer	gene
28008	p2_2_S2	2	16656	7.98819e-16	104	102	2	1.96078	G	A	synonymous_variant	LOW	MPN015	p.Tyr228Tyr	gene
28009	p2_2_S2	2	16662	0	107	106	1	0.943396	A	G	synonymous_variant	LOW	MPN015	p.Gly226Gly	gene
28010	p2_2_S2	2	16680	6.856e-15	102	101	1	0.990099	A	T	synonymous_variant	LOW	MPN015	p.Ala220Ala	gene
28011	p2_2_S2	2	16684	7.16183e-16	94	93	1	1.07527	A	G	missense_variant	MODERATE	MPN015	p.Ile219Thr	gene
28012	p2_2_S2	2	16691	6.856e-15	102	101	1	0.990099	T	C	missense_variant	MODERATE	MPN015	p.Lys217Glu	gene
28013	p2_2_S2	2	16692	0	104	103	1	0.970874	AAT	GAC	missense_variant	MODERATE	MPN015	p.Ile216Val	gene
28014	p2_2_S2	2	16699	2.25261e-15	94	92	2	2.17391	TGCTTTAT	TACTTCAA	missense_variant	MODERATE	MPN015	p.IleLysHis212LeuLysTyr	gene
28015	p2_2_S2	2	16709	0	93	92	1	1.08696	ATC	TTT	stop_gained	HIGH	MPN015	p.TrpTyr210*	gene
28016	p2_2_S2	2	16712	0	93	92	1	1.08696	A	C	missense_variant	MODERATE	MPN015	p.Trp210Gly	gene
28017	p2_2_S2	2	16720	5.89167e-15	95	93	2	2.15054	T	C	missense_variant	MODERATE	MPN015	p.Lys207Arg	gene
28018	p2_2_S2	2	16726	0	86	85	1	1.17647	A	G	missense_variant	MODERATE	MPN015	p.Leu205Ser	gene
28019	p2_2_S2	2	16738	3.39045e-15	88	87	1	1.14943	G	C	missense_variant	MODERATE	MPN015	p.Ala201Gly	gene
28020	p2_2_S2	2	16746	0	85	84	1	1.19048	T	A	synonymous_variant	LOW	MPN015	p.Ser198Ser	gene
28021	p2_2_S2	2	16753	0	78	76	2	2.63158	T	C	missense_variant	MODERATE	MPN015	p.Asn196Ser	gene
28022	p2_2_S2	2	16769	1.89876e-15	74	73	1	1.36986	C	T	missense_variant	MODERATE	MPN015	p.Asp191Asn	gene
28023	p2_2_S2	2	16780	3.52629e-15	90	89	1	1.1236	GTCC	ATCT	missense_variant	MODERATE	MPN015	p.ArgThr186LysIle	gene
28024	p2_2_S2	2	16806	0	99	98	1	1.02041	ACCA	TCCT	missense_variant	MODERATE	MPN015	p.Phe177Leu	gene
28025	p2_2_S2	2	16811	0	98	97	1	1.03093	ACA	GCT	stop_gained	HIGH	MPN015	p.LeuPhe176*	gene
28026	p2_2_S2	2	16817	0	96	95	1	1.05263	T	G	missense_variant	MODERATE	MPN015	p.Ile175Leu	gene
28027	p2_2_S2	2	16830	1.45803e-15	101	100	1	1	T	C	synonymous_variant	LOW	MPN015	p.Glu170Glu	gene
28028	p2_2_S2	2	16864	5.24377e-15	97	96	1	1.04167	A	C	missense_variant	MODERATE	MPN015	p.Ile159Ser	gene
28029	p2_2_S2	2	16872	0	88	86	2	2.32558	ATTA	TTTT	missense_variant	MODERATE	MPN015	p.Asn156Lys	gene
28030	p2_2_S2	2	16880	1.51453e-15	89	88	1	1.13636	TTT	ATA	missense_variant	MODERATE	MPN015	p.GlnAsn153LeuTyr	gene
28031	p2_2_S2	2	16900	7.08649e-16	91	90	1	1.11111	ATTTC	GTTTG	missense_variant	MODERATE	MPN015	p.GluIle146GlnThr	gene
28032	p2_2_S2	2	16909	0	92	91	1	1.0989	GCAT	ACAA	missense_variant	MODERATE	MPN015	p.AsnAla143IleVal	gene
28033	p2_2_S2	2	16930	2.84048e-15	94	93	1	1.07527	TCT	CCA	missense_variant	MODERATE	MPN015	p.GluAsp136AspGly	gene
28034	p2_2_S2	2	16938	0	91	90	1	1.11111	A	C	synonymous_variant	LOW	MPN015	p.Gly134Gly	gene
28035	p2_2_S2	2	16943	0	90	89	1	1.1236	A	G	missense_variant	MODERATE	MPN015	p.Tyr133His	gene
28036	p2_2_S2	2	16955	0	86	85	1	1.17647	TTTT	ATTA	stop_gained	HIGH	MPN015	p.LysLys128*	gene
28037	p2_2_S2	2	16973	7.30756e-15	75	74	1	1.35135	A	G	missense_variant	MODERATE	MPN015	p.Phe123Leu	gene
28038	p2_2_S2	2	16984	0	81	79	2	2.53165	TTTT	ATTA	missense_variant	MODERATE	MPN015	p.LysLys118IleMet	gene
28039	p2_2_S2	2	16992	1.76315e-15	83	82	1	1.21951	A	G	synonymous_variant	LOW	MPN015	p.Asp116Asp	gene
28040	p2_2_S2	2	17006	3.39257e-16	82	81	1	1.23457	T	A	missense_variant	MODERATE	MPN015	p.Thr112Ser	gene
28041	p2_2_S2	2	17009	0	84	82	2	2.43902	C	T	missense_variant	MODERATE	MPN015	p.Asp111Asn	gene
28042	p2_2_S2	2	17015	7.16442e-15	84	83	1	1.20482	T	C	missense_variant	MODERATE	MPN015	p.Thr109Ala	gene
28043	p2_2_S2	2	17027	0	80	79	1	1.26582	G	A	missense_variant	MODERATE	MPN015	p.His105Tyr	gene
28044	p2_2_S2	2	17028	0	73	72	1	1.38889	CTGCTTT	GTGCATA	missense_variant	MODERATE	MPN015	p.LeuLysGln102PheMetHis	gene
28045	p2_2_S2	2	17043	5.54488e-15	79	78	1	1.28205	G	C	stop_gained	HIGH	MPN015	p.Tyr99*	gene
28046	p2_2_S2	2	17044	1.01753e-15	76	75	1	1.33333	T	C	missense_variant	MODERATE	MPN015	p.Tyr99Cys	gene
28047	p2_2_S2	2	17078	1.15668e-15	67	66	1	1.51515	T	A	missense_variant	MODERATE	MPN015	p.Ile88Phe	gene
28048	p2_2_S2	2	17082	0	68	67	1	1.49254	TTGG	CTGA	synonymous_variant	LOW	MPN015	p.87	gene
28049	p2_2_S2	2	17090	4.14595e-16	60	59	1	1.69492	T	A	missense_variant	MODERATE	MPN015	p.Asn84Tyr	gene
28050	p2_2_S2	2	17104	2.80281e-15	72	71	1	1.40845	T	C	missense_variant	MODERATE	MPN015	p.Asn79Ser	gene
28051	p2_2_S2	2	17113	2.80281e-15	72	71	1	1.40845	T	G	missense_variant	MODERATE	MPN015	p.Asn76Thr	gene
28052	p2_2_S2	2	17146	3.05166e-15	70	69	1	1.44928	CGGTT	TGGTA	missense_variant	MODERATE	MPN015	p.AsnArg64TyrHis	gene
28053	p2_2_S2	2	17164	0	71	70	1	1.42857	A	G	missense_variant	MODERATE	MPN015	p.Val59Ala	gene
28054	p2_2_S2	2	17177	2.39622e-15	69	68	1	1.47059	GT	AA	missense_variant	MODERATE	MPN015	p.LysHis54AsnTyr	gene
28055	p2_2_S2	2	17180	0	68	67	1	1.49254	T	G	missense_variant	MODERATE	MPN015	p.Lys54Gln	gene
28056	p2_2_S2	2	17186	0	64	63	1	1.5873	C	T	missense_variant	MODERATE	MPN015	p.Asp52Asn	gene
28057	p2_2_S2	2	17190	1.30335e-15	58	57	1	1.75439	G	A	synonymous_variant	LOW	MPN015	p.Thr50Thr	gene
28058	p2_2_S2	2	17199	0	63	61	2	3.27869	A	T	missense_variant	MODERATE	MPN015	p.Asp47Glu	gene
28059	p2_2_S2	2	17220	2.56149e-16	69	68	1	1.47059	A	C	synonymous_variant	LOW	MPN015	p.Val40Val	gene
28060	p2_2_S2	2	17247	2.71688e-16	69	68	1	1.47059	G	A	synonymous_variant	LOW	MPN015	p.Val31Val	gene
28061	p2_2_S2	2	17257	0	68	67	1	1.49254	T	C	missense_variant	MODERATE	MPN015	p.Gln28Arg	gene
28062	p2_2_S2	2	17296	0	87	86	1	1.16279	T	A	missense_variant	MODERATE	MPN015	p.Tyr15Phe	gene
28063	p2_2_S2	2	17302	1.62e-15	87	84	3	3.57143	ACGA	TCAT	missense_variant	MODERATE	MPN015	p.LeuVal12HisAsp	gene
28064	p2_2_S2	2	17309	1.75538e-15	83	82	1	1.21951	C	T	missense_variant	MODERATE	MPN015	p.Ala11Thr	gene
28065	p2_2_S2	2	17338	2.63707e-15	81	80	1	1.25	A	C	start_lost	HIGH	MPN015	p.Met1?	gene
28066	p2_2_S2	2	17344	0	86	85	1	1.17647	CGAT	TGAC	missense_variant	MODERATE	MPN016	p.IleAla287ValThr	gene
28067	p2_2_S2	2	17350	0	81	80	1	1.25	ATGCT	GTGCA	missense_variant	MODERATE	MPN016	p.LeuAlaSer284PheAlaPro	gene
28068	p2_2_S2	2	17407	6.93887e-15	80	79	1	1.26582	G	C	missense_variant	MODERATE	MPN016	p.Gln267Glu	gene
28069	p2_2_S2	2	17418	2.84048e-15	60	59	1	1.69492	TTA	CTG	missense_variant	MODERATE	MPN016	p.Asn263Ser	gene
28070	p2_2_S2	2	17437	3.30357e-15	58	57	1	1.75439	A	G	synonymous_variant	LOW	MPN016	p.Leu257Leu	gene
28071	p2_2_S2	2	17442	4.14595e-16	60	59	1	1.69492	C	T	missense_variant	MODERATE	MPN016	p.Arg255His	gene
28072	p2_2_S2	2	17460	3.69157e-15	60	58	2	3.44828	AAGTC	TAGTT	missense_variant	MODERATE	MPN016	p.AspPhe248AsnTyr	gene
28073	p2_2_S2	2	17469	2.93089e-15	63	62	1	1.6129	C	G	missense_variant	MODERATE	MPN016	p.Gly246Ala	gene
28074	p2_2_S2	2	17487	3.14207e-15	64	62	2	3.22581	A	C	missense_variant	MODERATE	MPN016	p.Met240Arg	gene
28075	p2_2_S2	2	17514	0	64	61	3	4.91803	TTGGTTTCT	CTGGATTCT	missense_variant	MODERATE	MPN016	p.ThrLys230SerArg	gene
28076	p2_2_S2	2	17589	7.3982e-15	53	52	1	1.92308	T	C	missense_variant	MODERATE	MPN016	p.Asn206Ser	gene
28077	p2_2_S2	2	17669	7.45094e-15	66	65	1	1.53846	T	A	missense_variant	MODERATE	MPN016	p.Gln179His	gene
28078	p2_2_S2	2	17711	0	68	67	1	1.49254	A	G	synonymous_variant	LOW	MPN016	p.Arg165Arg	gene
28079	p2_2_S2	2	17738	0	74	73	1	1.36986	AAA	TAG	missense_variant	MODERATE	MPN016	p.Phe156Leu	gene
28080	p2_2_S2	2	17745	3.53359e-15	79	78	1	1.28205	T	A	missense_variant	MODERATE	MPN016	p.Tyr154Phe	gene
28081	p2_2_S2	2	17750	0	80	79	1	1.26582	A	C	synonymous_variant	LOW	MPN016	p.Gly152Gly	gene
28082	p2_2_S2	2	17764	0	85	83	2	2.40964	AGATACT	TGTTACT	missense_variant	MODERATE	MPN016	p.IleTyr147AsnAsn	gene
28083	p2_2_S2	2	17771	1.97409e-15	87	86	1	1.16279	T	C	synonymous_variant	LOW	MPN016	p.Lys145Lys	gene
28084	p2_2_S2	2	17776	0	94	93	1	1.07527	C	A	missense_variant	MODERATE	MPN016	p.Val144Phe	gene
28085	p2_2_S2	2	17777	0	96	95	1	1.05263	AA	GT	missense_variant	MODERATE	MPN016	p.Ile143Asn	gene
28086	p2_2_S2	2	17783	0	94	93	1	1.07527	T	C	synonymous_variant	LOW	MPN016	p.Pro141Pro	gene
28087	p2_2_S2	2	17812	3.38292e-15	88	87	1	1.14943	C	G	missense_variant	MODERATE	MPN016	p.Glu132Gln	gene
28088	p2_2_S2	2	17829	3.75207e-15	83	82	1	1.21951	T	C	missense_variant	MODERATE	MPN016	p.Lys126Arg	gene
28089	p2_2_S2	2	17830	5.53005e-15	79	78	1	1.28205	T	A	stop_gained	HIGH	MPN016	p.Lys126*	gene
28090	p2_2_S2	2	17843	0	86	85	1	1.17647	AGCTA	TGCTG	missense_variant	MODERATE	MPN016	p.Leu120Ser	gene
28091	p2_2_S2	2	17856	0	82	81	1	1.23457	T	C	missense_variant	MODERATE	MPN016	p.Asn117Ser	gene
28092	p2_2_S2	2	17861	0	87	86	1	1.16279	T	C	synonymous_variant	LOW	MPN016	p.Pro115Pro	gene
28093	p2_2_S2	2	17862	1.95879e-15	87	86	1	1.16279	G	T	missense_variant	MODERATE	MPN016	p.Pro115Gln	gene
28094	p2_2_S2	2	17894	0	80	79	1	1.26582	T	G	synonymous_variant	LOW	MPN016	p.Pro104Pro	gene
28095	p2_2_S2	2	17898	8.63092e-16	85	84	1	1.19048	T	G	missense_variant	MODERATE	MPN016	p.His103Pro	gene
28096	p2_2_S2	2	17904	3.79351e-15	77	76	1	1.31579	GCTAA	ACTAT	missense_variant	MODERATE	MPN016	p.LeuAla100IleVal	gene
28097	p2_2_S2	2	17912	0	77	76	1	1.31579	A	C	synonymous_variant	LOW	MPN016	p.Ala98Ala	gene
28098	p2_2_S2	2	17921	0	81	80	1	1.25	CAAG	TAAA	synonymous_variant	LOW	MPN016	p.96	gene
28099	p2_2_S2	2	17931	5.53005e-15	79	78	1	1.28205	T	C	missense_variant	MODERATE	MPN016	p.Asn92Ser	gene
28100	p2_2_S2	2	17942	3.68403e-15	70	69	1	1.44928	A	T	missense_variant	MODERATE	MPN016	p.Asn88Lys	gene
28101	p2_2_S2	2	17961	1.507e-15	71	70	1	1.42857	TTAAT	CTAAC	missense_variant	MODERATE	MPN016	p.IleAsn81ValSer	gene
28102	p2_2_S2	2	17969	0	72	70	2	2.85714	GCGCAA	ACGCTA	stop_gained	HIGH	MPN016	p.Leu78*	gene
28103	p2_2_S2	2	17983	4.26437e-15	81	79	2	2.53165	ATTCTA	GTTCCA	missense_variant	MODERATE	MPN016	p.Ser75Pro	gene
28104	p2_2_S2	2	17990	0	91	90	1	1.11111	C	G	missense_variant	MODERATE	MPN016	p.Trp72Cys	gene
28105	p2_2_S2	2	18009	0	77	76	1	1.31579	TTTT	ATTA	missense_variant	MODERATE	MPN016	p.LysAsn65IleIle	gene
28106	p2_2_S2	2	18020	2.5542e-15	78	77	1	1.2987	AAACAA	TTACTT	stop_gained	HIGH	MPN016	p.LeuPhe61*	gene
28107	p2_2_S2	2	18032	0	81	80	1	1.25	A	G	synonymous_variant	LOW	MPN016	p.Asn58Asn	gene
28108	p2_2_S2	2	18034	1.21718e-15	80	79	1	1.26582	T	G	missense_variant	MODERATE	MPN016	p.Asn58His	gene
28109	p2_2_S2	2	18063	5.37914e-15	88	87	1	1.14943	T	G	missense_variant	MODERATE	MPN016	p.Gln48Pro	gene
28110	p2_2_S2	2	18126	0	91	89	2	2.24719	TCCTTT	ATCTTA	missense_variant	MODERATE	MPN016	p.LeuLysAsp25PheLysIle	gene
28111	p2_2_S2	2	18133	2.85555e-15	82	80	2	2.5	A	G	synonymous_variant	LOW	MPN016	p.Leu25Leu	gene
28112	p2_2_S2	2	18173	0	77	76	1	1.31579	A	G	synonymous_variant	LOW	MPN016	p.Ala11Ala	gene
28113	p2_2_S2	2	18175	0	76	75	1	1.33333	C	G	missense_variant	MODERATE	MPN016	p.Ala11Pro	gene
28114	p2_2_S2	2	18193	1.89122e-15	74	73	1	1.36986	T	C	missense_variant	MODERATE	MPN016	p.Ser5Gly	gene
28115	p2_2_S2	2	18199	1.90605e-15	74	73	1	1.36986	G	A	missense_variant	MODERATE	MPN016	p.His3Tyr	gene
28116	p2_2_S2	2	18203	0	77	75	2	2.66667	CATAAAG	TAAAAAA	missense_variant	MODERATE	MPN017	p.LeuTyrGlu261PhePheLys	gene
28117	p2_2_S2	2	18213	5.53005e-15	79	78	1	1.28205	T	C	synonymous_variant	LOW	MPN017	p.Trp259Trp	gene
28118	p2_2_S2	2	18289	3.68403e-15	70	69	1	1.44928	T	C	missense_variant	MODERATE	MPN017	p.Lys234Arg	gene
28119	p2_2_S2	2	18298	0	74	73	1	1.36986	CCAT	TCAC	missense_variant	MODERATE	MPN017	p.AsnGly230SerGlu	gene
28120	p2_2_S2	2	18310	2.34349e-15	78	77	1	1.2987	ATGTC	TTGTT	missense_variant	MODERATE	MPN017	p.AspIle226AsnAsn	gene
28121	p2_2_S2	2	18315	0	85	84	1	1.19048	AC	GT	missense_variant	MODERATE	MPN017	p.Gly225Asp	gene
28122	p2_2_S2	2	18318	3.46791e-16	82	81	1	1.23457	A	C	missense_variant	MODERATE	MPN017	p.Cys224Trp	gene
28123	p2_2_S2	2	18320	0	84	83	1	1.20482	A	T	missense_variant	MODERATE	MPN017	p.Cys224Ser	gene
28124	p2_2_S2	2	18339	1.19081e-15	74	72	2	2.77778	A	T	synonymous_variant	LOW	MPN017	p.Arg217Arg	gene
28125	p2_2_S2	2	18346	0	75	72	3	4.16667	ACCCCC	TCCCTT	missense_variant	MODERATE	MPN017	p.GlyVal214ArgGlu	gene
28126	p2_2_S2	2	18380	2.71688e-16	69	68	1	1.47059	A	G	missense_variant	MODERATE	MPN017	p.Phe204Leu	gene
28127	p2_2_S2	2	18383	0	66	65	1	1.53846	TAGTG	AAGTA	missense_variant	MODERATE	MPN017	p.Asn203Tyr	gene
28128	p2_2_S2	2	18389	0	62	61	1	1.63934	T	A	missense_variant	MODERATE	MPN017	p.Thr201Ser	gene
28129	p2_2_S2	2	18413	0	72	71	1	1.40845	T	G	missense_variant	MODERATE	MPN017	p.Ile193Leu	gene
28130	p2_2_S2	2	18445	0	67	66	1	1.51515	A	G	missense_variant	MODERATE	MPN017	p.Leu182Pro	gene
28131	p2_2_S2	2	18464	0	71	70	1	1.42857	T	A	missense_variant	MODERATE	MPN017	p.Thr176Ser	gene
28132	p2_2_S2	2	18481	5.31157e-15	75	74	1	1.35135	A	C	missense_variant	MODERATE	MPN017	p.Val170Gly	gene
28133	p2_2_S2	2	18502	5.66542e-15	79	78	1	1.28205	TTTA	ATTT	stop_gained	HIGH	MPN017	p.LeuLys162*	gene
28134	p2_2_S2	2	18511	7.30756e-15	75	74	1	1.35135	T	A	missense_variant	MODERATE	MPN017	p.His160Leu	gene
28135	p2_2_S2	2	18515	2.79528e-15	72	71	1	1.40845	A	T	missense_variant	MODERATE	MPN017	p.Phe159Ile	gene
28136	p2_2_S2	2	18517	3.54489e-15	79	78	1	1.28205	A	G	missense_variant	MODERATE	MPN017	p.Ile158Thr	gene
28137	p2_2_S2	2	18580	8.70626e-16	85	84	1	1.19048	T	C	missense_variant	MODERATE	MPN017	p.His137Arg	gene
28138	p2_2_S2	2	18586	7.16442e-15	84	83	1	1.20482	T	G	missense_variant	MODERATE	MPN017	p.His135Pro	gene
28139	p2_2_S2	2	18610	0	77	76	1	1.31579	T	C	missense_variant	MODERATE	MPN017	p.Glu127Gly	gene
28140	p2_2_S2	2	18612	1.97409e-15	87	86	1	1.16279	C	T	synonymous_variant	LOW	MPN017	p.Val126Val	gene
28141	p2_2_S2	2	18618	0	95	94	1	1.06383	A	T	missense_variant	MODERATE	MPN017	p.Cys124Trp	gene
28142	p2_2_S2	2	18628	1.97409e-15	87	86	1	1.16279	A	G	missense_variant	MODERATE	MPN017	p.Ile121Thr	gene
28143	p2_2_S2	2	18642	0	96	95	1	1.05263	G	C	missense_variant	MODERATE	MPN017	p.Asn116Lys	gene
28144	p2_2_S2	2	18650	0	89	87	2	2.29885	T	A	missense_variant	MODERATE	MPN017	p.Thr114Ser	gene
28145	p2_2_S2	2	18652	2.48992e-15	90	89	1	1.1236	A	G	missense_variant	MODERATE	MPN017	p.Leu113Ser	gene
28146	p2_2_S2	2	18684	0	91	90	1	1.11111	T	A	missense_variant	MODERATE	MPN017	p.Lys102Asn	gene
28147	p2_2_S2	2	18696	0	85	84	1	1.19048	G	C	missense_variant	MODERATE	MPN017	p.Asn98Lys	gene
28148	p2_2_S2	2	18761	3.47309e-15	101	100	1	1	T	G	missense_variant	MODERATE	MPN017	p.Asn77His	gene
28149	p2_2_S2	2	18766	0	85	84	1	1.19048	T	A	missense_variant	MODERATE	MPN017	p.Gln75Leu	gene
28150	p2_2_S2	2	18767	0	89	88	1	1.13636	G	A	stop_gained	HIGH	MPN017	p.Gln75*	gene
28151	p2_2_S2	2	18781	0	86	85	1	1.17647	A	T	stop_gained	HIGH	MPN017	p.Leu70*	gene
28152	p2_2_S2	2	18816	0	81	80	1	1.25	AAT	TAC	missense_variant	MODERATE	MPN017	p.Ile58Val	gene
28153	p2_2_S2	2	18823	2.28274e-15	86	85	1	1.17647	TC	AT	missense_variant	MODERATE	MPN017	p.Glu56Ile	gene
28154	p2_2_S2	2	18844	0	98	97	1	1.03093	T	C	missense_variant	MODERATE	MPN017	p.Asn49Ser	gene
28155	p2_2_S2	2	18849	1.65979e-16	100	99	1	1.0101	AGCAT	GGCAC	missense_variant	MODERATE	MPN017	p.Asn46Ser	gene
28156	p2_2_S2	2	18865	0	94	93	1	1.07527	CGAA	TGAT	missense_variant	MODERATE	MPN017	p.IleArg41AsnHis	gene
28157	p2_2_S2	2	18879	1.36739e-15	98	97	1	1.03093	AGA	TGT	missense_variant	MODERATE	MPN017	p.Ser37Thr	gene
28158	p2_2_S2	2	18899	0	86	85	1	1.17647	T	C	missense_variant	MODERATE	MPN017	p.Thr31Ala	gene
28159	p2_2_S2	2	18926	3.05896e-15	83	82	1	1.21951	TTCAATCC	ATCAGTCG	missense_variant	MODERATE	MPN017	p.ArgAspTrpSer19SerAspTrpCys	gene
28160	p2_2_S2	2	18945	1.17009e-16	78	77	1	1.2987	A	G	synonymous_variant	LOW	MPN017	p.Thr15Thr	gene
28161	p2_2_S2	2	18952	0	85	84	1	1.19048	AGGAT	GGGAA	missense_variant	MODERATE	MPN017	p.IleLeu12PhePro	gene
28162	p2_2_S2	2	18958	0	87	86	1	1.16279	T	C	missense_variant	MODERATE	MPN017	p.Glu11Gly	gene
28163	p2_2_S2	2	18969	6.94641e-15	80	79	1	1.26582	T	C	synonymous_variant	LOW	MPN017	p.Gln7Gln	gene
28164	p2_2_S2	2	18972	0	81	79	2	2.53165	CTTGC	CTGC	frameshift_variant	HIGH	MPN017	p.Lys6fs	gene
28165	p2_2_S2	2	18977	3.68403e-15	81	80	1	1.25	CAT	TAA	missense_variant	MODERATE	MPN017	p.AspGly4ValSer	gene
28166	p2_2_S2	2	18981	0	77	76	1	1.31579	A	G	synonymous_variant	LOW	MPN017	p.Phe3Phe	gene
28167	p2_2_S2	2	18990	0	84	83	1	1.20482	C	T	upstream_gene_variant	MODIFIER	MPN012	c.-4725G>A	intergenic
28168	p2_2_S2	2	19003	1.00977e-15	80	78	2	2.5641	G	A	upstream_gene_variant	MODIFIER	MPN012	c.-4738C>T	intergenic
28169	p2_2_S2	2	19029	0	82	81	1	1.23457	GCC	CCT	upstream_gene_variant	MODIFIER	MPN012	c.-4766_-4764delGGCinsAGG	intergenic
28170	p2_2_S2	2	19034	7.30756e-15	75	74	1	1.35135	A	G	upstream_gene_variant	MODIFIER	MPN012	c.-4769T>C	intergenic
28171	p2_2_S2	2	19036	7.59455e-15	70	69	1	1.44928	TTAATCTTATATG	ATAGTCTAGTATC	upstream_gene_variant	MODIFIER	MPN012	c.-4783_-4771delCATATAAGATTAAinsGATACTAGACTAT	intergenic
28172	p2_2_S2	2	19063	1.97409e-15	87	86	1	1.16279	T	G	upstream_gene_variant	MODIFIER	MPN012	c.-4798A>C	intergenic
28173	p2_2_S2	2	19067	0	94	92	2	2.17391	TCTT	AATA	upstream_gene_variant	MODIFIER	MPN012	c.-4805_-4802delAAGAinsTATT	intergenic
28174	p2_2_S2	2	19090	1.61247e-15	87	86	1	1.16279	TCTC	ACTT	upstream_gene_variant	MODIFIER	MPN012	c.-4828_-4825delGAGAinsAAGT	intergenic
28175	p2_2_S2	2	19100	6.37384e-15	86	85	1	1.17647	TCAAC	ACAAT	upstream_gene_variant	MODIFIER	MPN012	c.-4839_-4835delGTTGAinsATTGT	intergenic
28176	p2_2_S2	2	19142	1.20541e-16	78	77	1	1.2987	A	C	upstream_gene_variant	MODIFIER	MPN012	c.-4877T>G	intergenic
28177	p2_2_S2	2	19151	4.01552e-15	74	73	1	1.36986	TTAT	ATAA	upstream_gene_variant	MODIFIER	MPN012	c.-4889_-4886delATAAinsTTAT	intergenic
28178	p2_2_S2	2	19158	3.52629e-15	79	78	1	1.28205	T	C	upstream_gene_variant	MODIFIER	MPN012	c.-4893A>G	intergenic
28179	p2_2_S2	2	19178	1.65791e-15	80	79	1	1.26582	CCATCGAC	TTAATGAT	upstream_gene_variant	MODIFIER	MPN012	c.-4920_-4913delGTCGATGGinsATCATTAA	intergenic
28180	p2_2_S2	2	19226	0	72	71	1	1.40845	A	T	upstream_gene_variant	MODIFIER	MPN012	c.-4961T>A	intergenic
28181	p2_2_S2	2	19247	0	71	69	2	2.89855	A	G	upstream_gene_variant	MODIFIER	MPN012	c.-4982T>C	intergenic
28182	p2_2_S2	2	19262	4.97467e-16	73	72	1	1.38889	A	T	upstream_gene_variant	MODIFIER	MPN012	c.-4997T>A	intergenic
28183	p2_2_S2	2	19276	0	67	66	1	1.51515	A	T	upstream_gene_variant	MODIFIER	MPN015	c.-1937T>A	intergenic
28184	p2_2_S2	2	19296	2.6971e-15	66	65	1	1.53846	CGG	TGA	upstream_gene_variant	MODIFIER	MPN015	c.-1959_-1957delCCGinsTCA	intergenic
28185	p2_2_S2	2	19299	0	76	74	2	2.7027	T	C	upstream_gene_variant	MODIFIER	MPN015	c.-1960A>G	intergenic
28186	p2_2_S2	2	19303	0	68	66	2	3.0303	ATAATTA	TTAGTTT	upstream_gene_variant	MODIFIER	MPN015	c.-1970_-1964delTAATTATinsAAACTAA	intergenic
28187	p2_2_S2	2	19315	0	77	76	1	1.31579	AGTA	GGTG	upstream_gene_variant	MODIFIER	MPN015	c.-1979_-1976delTACTinsCACC	intergenic
28188	p2_2_S2	2	19325	5.65059e-15	79	78	1	1.28205	ATGG	TTGA	initiator_codon_variant	LOW	MPN018	p.MetGly1?	gene
28189	p2_2_S2	2	19333	7.50367e-15	73	72	1	1.38889	TGT	AGA	missense_variant	MODERATE	MPN018	p.Val4Asp	gene
28190	p2_2_S2	2	19351	2.63919e-16	69	68	1	1.47059	C	G	missense_variant	MODERATE	MPN018	p.Asn9Lys	gene
28191	p2_2_S2	2	19376	5.33394e-15	65	63	2	3.1746	CTGG	GTGA	missense_variant	MODERATE	MPN018	p.LeuAla18ValThr	gene
28192	p2_2_S2	2	19404	0	71	70	1	1.42857	TTATTATT	CTGTTACA	missense_variant	MODERATE	MPN018	p.IleIleIle27ThrValThr	gene
28193	p2_2_S2	2	19421	1.15291e-15	76	75	1	1.33333	ATTCCGT	GTTTCAA	missense_variant	MODERATE	MPN018	p.IleProSer33ValSerThr	gene
28194	p2_2_S2	2	19442	0	90	89	1	1.1236	G	A	missense_variant	MODERATE	MPN018	p.Ala40Thr	gene
28195	p2_2_S2	2	19455	0	77	76	1	1.31579	T	C	missense_variant	MODERATE	MPN018	p.Val44Ala	gene
28196	p2_2_S2	2	19464	7.30756e-15	75	74	1	1.35135	T	C	missense_variant	MODERATE	MPN018	p.Ile47Thr	gene
28197	p2_2_S2	2	19469	1.80082e-15	71	70	1	1.42857	ACG	TCA	missense_variant	MODERATE	MPN018	p.Thr49Ser	gene
28198	p2_2_S2	2	19482	0	72	71	1	1.40845	AAG	GAC	missense_variant	MODERATE	MPN018	p.LysGlu53ArgGln	gene
28199	p2_2_S2	2	19500	0	71	70	1	1.42857	GAG	TAC	missense_variant	MODERATE	MPN018	p.GlyVal59ValLeu	gene
28200	p2_2_S2	2	19514	0	73	72	1	1.38889	TTT	GTA	missense_variant	MODERATE	MPN018	p.Phe64Val	gene
28201	p2_2_S2	2	19526	2.78986e-16	69	68	1	1.47059	A	G	missense_variant	MODERATE	MPN018	p.Ser68Gly	gene
28202	p2_2_S2	2	19558	6.48614e-16	64	63	1	1.5873	G	A	synonymous_variant	LOW	MPN018	p.Ala78Ala	gene
28203	p2_2_S2	2	19559	0	64	63	1	1.5873	C	T	stop_gained	HIGH	MPN018	p.Gln79*	gene
28204	p2_2_S2	2	19565	0	66	65	1	1.53846	GTGTTAG	ATGATAA	missense_variant	MODERATE	MPN018	p.ValLeuAla81MetIleThr	gene
28205	p2_2_S2	2	19581	2.0492e-15	65	64	1	1.5625	T	C	missense_variant	MODERATE	MPN018	p.Val86Ala	gene
28206	p2_2_S2	2	19614	2.1549e-15	72	71	1	1.40845	GGTT	AGTA	stop_gained	HIGH	MPN018	p.GlyLeu97*	gene
28207	p2_2_S2	2	19626	0	67	66	1	1.51515	T	A	missense_variant	MODERATE	MPN018	p.Ile101Asn	gene
28208	p2_2_S2	2	19754	2.117e-15	78	77	1	1.2987	A	T	missense_variant	MODERATE	MPN018	p.Thr144Ser	gene
28209	p2_2_S2	2	19781	1.34102e-15	80	79	1	1.26582	ATGAC	GTGAT	missense_variant	MODERATE	MPN018	p.MetThr153ValIle	gene
28210	p2_2_S2	2	19792	0	68	67	1	1.49254	T	C	synonymous_variant	LOW	MPN018	p.Asp156Asp	gene
28211	p2_2_S2	2	19809	5.68049e-15	70	69	1	1.44928	T	C	missense_variant	MODERATE	MPN018	p.Val162Ala	gene
28212	p2_2_S2	2	19831	4.89698e-16	73	72	1	1.38889	AGGGGGTC	AGGGGGGTC	frameshift_variant	HIGH	MPN018	p.Leu172fs	gene
28213	p2_2_S2	2	19855	0	73	72	1	1.38889	CACTAA	TTCTAT	missense_variant	MODERATE	MPN018	p.ThrAsn178SerIle	gene
28214	p2_2_S2	2	19865	0	76	75	1	1.33333	G	A	missense_variant	MODERATE	MPN018	p.Asp181Asn	gene
28215	p2_2_S2	2	19879	2.07203e-15	87	86	1	1.16279	GCTA	ACTT	synonymous_variant	LOW	MPN018	p.187	gene
28216	p2_2_S2	2	19889	8.81926e-16	92	90	2	2.22222	A	T	missense_variant	MODERATE	MPN018	p.Thr189Ser	gene
28217	p2_2_S2	2	19893	0	86	85	1	1.17647	TTC	CTT	missense_variant	MODERATE	MPN018	p.PhePro190SerSer	gene
28218	p2_2_S2	2	19901	0	84	83	1	1.20482	ACC	TCT	missense_variant	MODERATE	MPN018	p.Thr193Ser	gene
28219	p2_2_S2	2	19904	3.75984e-15	83	82	1	1.21951	T	G	missense_variant	MODERATE	MPN018	p.Phe194Val	gene
28220	p2_2_S2	2	19908	5.16819e-15	84	83	1	1.20482	T	A	stop_gained	HIGH	MPN018	p.Leu195*	gene
28221	p2_2_S2	2	19909	5.16819e-15	84	83	1	1.20482	A	G	synonymous_variant	LOW	MPN018	p.Leu195Leu	gene
28222	p2_2_S2	2	19922	4.58079e-15	85	83	2	2.40964	CTCAACAA	TTCATCAA	missense_variant	MODERATE	MPN018	p.LeuAsn200PheIle	gene
28223	p2_2_S2	2	19933	1.36079e-16	86	84	2	2.38095	ATCGACCCC	TTCAACCCC	missense_variant	MODERATE	MPN018	p.Lys203Asn	gene
28224	p2_2_S2	2	19950	0	94	92	2	2.17391	AG	CT	missense_variant	MODERATE	MPN018	p.Lys209Thr	gene
28225	p2_2_S2	2	19953	0	90	88	2	2.27273	ACAACCAGA	TCATCTAGA	stop_gained	HIGH	MPN018	p.AsnAsnGln210*	gene
28226	p2_2_S2	2	19973	0	88	87	1	1.14943	CAAATTAA	TAAGTTAG	stop_gained	HIGH	MPN018	p.GlnIleAsn217*	gene
28227	p2_2_S2	2	19989	6.2759e-15	78	76	2	2.63158	TGGAGGAAG	AGGAAGAAG	missense_variant	MODERATE	MPN018	p.Val222Glu	gene
28228	p2_2_S2	2	20010	6.65235e-15	98	97	1	1.03093	A	G	missense_variant	MODERATE	MPN018	p.Tyr229Cys	gene
28229	p2_2_S2	2	20027	6.80326e-15	89	88	1	1.13636	T	C	missense_variant	MODERATE	MPN018	p.Phe235Leu	gene
28230	p2_2_S2	2	20050	0	81	80	1	1.25	T	C	synonymous_variant	LOW	MPN018	p.Cys242Cys	gene
28231	p2_2_S2	2	20087	0	90	89	1	1.1236	T	C	missense_variant	MODERATE	MPN018	p.Ser255Pro	gene
28232	p2_2_S2	2	20114	2.5469e-15	100	98	2	2.04082	A	T	missense_variant	MODERATE	MPN018	p.Thr264Ser	gene
28233	p2_2_S2	2	20123	0	99	98	1	1.02041	ATTCC	TTTCT	missense_variant	MODERATE	MPN018	p.IlePro267PheLeu	gene
28234	p2_2_S2	2	20132	1.68781e-15	105	104	1	0.961538	A	T	missense_variant	MODERATE	MPN018	p.Thr270Ser	gene
28235	p2_2_S2	2	20156	0	107	106	1	0.943396	A	T	missense_variant	MODERATE	MPN018	p.Ile278Phe	gene
28236	p2_2_S2	2	20190	0	94	92	2	2.17391	A	T	missense_variant	MODERATE	MPN018	p.Asp289Val	gene
28237	p2_2_S2	2	20248	1.74784e-15	83	82	1	1.21951	T	C	synonymous_variant	LOW	MPN018	p.Phe308Phe	gene
28238	p2_2_S2	2	20262	1.0625e-15	86	84	2	2.38095	A	G	missense_variant	MODERATE	MPN018	p.Tyr313Cys	gene
28239	p2_2_S2	2	20274	0	75	73	2	2.73973	TTGT	CTGC	missense_variant	MODERATE	MPN018	p.IleVal317ThrAla	gene
28240	p2_2_S2	2	20283	2.56149e-16	78	77	1	1.2987	GTT	ATA	missense_variant	MODERATE	MPN018	p.GlyLeu320AspIle	gene
28241	p2_2_S2	2	20321	1.80835e-15	71	70	1	1.42857	CGT	TGA	missense_variant	MODERATE	MPN018	p.Arg333Trp	gene
28242	p2_2_S2	2	20325	0	74	73	1	1.36986	CCC	TCT	missense_variant	MODERATE	MPN018	p.SerArg334PheCys	gene
28243	p2_2_S2	2	20339	1.20541e-16	78	77	1	1.2987	G	C	missense_variant	MODERATE	MPN018	p.Gly339Arg	gene
28244	p2_2_S2	2	20430	0	92	91	1	1.0989	ACGTG	TCGTA	missense_variant	MODERATE	MPN018	p.Asn369Ile	gene
28245	p2_2_S2	2	20483	0	94	93	1	1.07527	A	G	missense_variant	MODERATE	MPN018	p.Asn387Asp	gene
28246	p2_2_S2	2	20494	0	89	88	1	1.13636	T	G	missense_variant	MODERATE	MPN018	p.Phe390Leu	gene
28247	p2_2_S2	2	20516	0	93	92	1	1.08696	ATTGT	CTTGA	missense_variant	MODERATE	MPN018	p.IleVal398LeuGlu	gene
28248	p2_2_S2	2	20521	0	91	90	1	1.11111	GGGAC	AGGAT	missense_variant	MODERATE	MPN018	p.Pro401Ser	gene
28249	p2_2_S2	2	20540	0	90	89	1	1.1236	A	G	missense_variant	MODERATE	MPN018	p.Lys406Glu	gene
28250	p2_2_S2	2	20572	5.08556e-15	106	105	1	0.952381	A	T	missense_variant	MODERATE	MPN018	p.Leu416Phe	gene
28251	p2_2_S2	2	20575	0	106	104	2	1.92308	T	A	stop_gained	HIGH	MPN018	p.Tyr417*	gene
28252	p2_2_S2	2	20590	0	105	104	1	0.961538	T	C	synonymous_variant	LOW	MPN018	p.Gly422Gly	gene
28253	p2_2_S2	2	20628	0	112	111	1	0.900901	A	G	missense_variant	MODERATE	MPN018	p.Asp435Gly	gene
28254	p2_2_S2	2	20637	0	111	110	1	0.909091	A	T	missense_variant	MODERATE	MPN018	p.Tyr438Phe	gene
28255	p2_2_S2	2	20673	3.06249e-15	115	114	1	0.877193	ACA	CCT	missense_variant	MODERATE	MPN018	p.AsnIle450ThrPhe	gene
28256	p2_2_S2	2	20699	0	122	121	1	0.826446	TCCAA	CCCAT	missense_variant	MODERATE	MPN018	p.SerAsn459ProIle	gene
28257	p2_2_S2	2	20706	5.68826e-15	119	117	2	1.7094	T	C	missense_variant	MODERATE	MPN018	p.Ile461Thr	gene
28258	p2_2_S2	2	20710	4.79174e-15	124	123	1	0.813008	G	A	synonymous_variant	LOW	MPN018	p.Lys462Lys	gene
28259	p2_2_S2	2	20711	0	123	122	1	0.819672	AT	TA	stop_gained	HIGH	MPN018	p.Ile463*	gene
28260	p2_2_S2	2	20719	0	111	110	1	0.909091	GGA	AGT	missense_variant	MODERATE	MPN018	p.Glu466Val	gene
28261	p2_2_S2	2	20753	5.08556e-15	106	105	1	0.952381	A	T	missense_variant	MODERATE	MPN018	p.Ser477Cys	gene
28262	p2_2_S2	2	20779	0	103	102	1	0.980392	C	T	synonymous_variant	LOW	MPN018	p.Arg485Arg	gene
28263	p2_2_S2	2	20780	7.52627e-15	105	104	1	0.961538	GCTG	ACTA	missense_variant	MODERATE	MPN018	p.AlaAla486ThrThr	gene
28264	p2_2_S2	2	20814	0	94	93	1	1.07527	A	T	missense_variant	MODERATE	MPN018	p.Glu497Val	gene
28265	p2_2_S2	2	20828	3.29981e-15	110	109	1	0.917431	A	T	missense_variant	MODERATE	MPN018	p.Thr502Ser	gene
28266	p2_2_S2	2	20838	0	86	85	1	1.17647	A	G	missense_variant	MODERATE	MPN018	p.His505Arg	gene
28267	p2_2_S2	2	20856	2.56149e-16	78	77	1	1.2987	GCA	CTT	stop_gained	HIGH	MPN018	p.GlyLys511*	gene
28268	p2_2_S2	2	20872	0	79	78	1	1.28205	T	G	synonymous_variant	LOW	MPN018	p.Gly516Gly	gene
28269	p2_2_S2	2	20884	1.89876e-15	74	73	1	1.36986	A	G	synonymous_variant	LOW	MPN018	p.Gln520Gln	gene
28270	p2_2_S2	2	20887	0	75	74	1	1.35135	CGT	TGC	missense_variant	MODERATE	MPN018	p.Val522Ala	gene
28271	p2_2_S2	2	20899	0	77	76	1	1.31579	T	C	synonymous_variant	LOW	MPN018	p.Ala525Ala	gene
28272	p2_2_S2	2	20924	0	70	69	1	1.44928	ATCTTA	TTCACT	missense_variant	MODERATE	MPN018	p.IleLeu534PheThr	gene
28273	p2_2_S2	2	20931	2.79528e-15	72	71	1	1.40845	T	C	missense_variant	MODERATE	MPN018	p.Val536Ala	gene
28274	p2_2_S2	2	20943	0	94	93	1	1.07527	G	T	missense_variant	MODERATE	MPN018	p.Ser540Ile	gene
28275	p2_2_S2	2	20950	1.87615e-15	83	82	1	1.21951	TGC	ACG	missense_variant	MODERATE	MPN018	p.SerAla542ArgArg	gene
28276	p2_2_S2	2	20955	3.39257e-16	82	81	1	1.23457	T	C	missense_variant	MODERATE	MPN018	p.Leu544Pro	gene
28277	p2_2_S2	2	20958	0	81	80	1	1.25	A	G	missense_variant	MODERATE	MPN018	p.Asp545Gly	gene
28278	p2_2_S2	2	20961	3.61623e-16	82	81	1	1.23457	CTTTAACCG	GTTTGACCA	missense_variant	MODERATE	MPN018	p.AlaLeuThrGlu546GlyLeuThrLys	gene
28279	p2_2_S2	2	20974	0	79	78	1	1.28205	GAAGGTCCGGGA	CATGATCTCGGT	missense_variant	MODERATE	MPN018	p.LysLysValArgGlu550AsnMetIleSerVal	gene
28280	p2_2_S2	2	20986	0	93	92	1	1.08696	AAACA	CAACG	missense_variant	MODERATE	MPN018	p.GluAsnIle554AspAsnVal	gene
28281	p2_2_S2	2	20993	0	92	91	1	1.0989	GCCA	ACCT	missense_variant	MODERATE	MPN018	p.AlaAsn557ThrTyr	gene
28282	p2_2_S2	2	21004	5.00998e-15	93	92	1	1.08696	T	A	synonymous_variant	LOW	MPN018	p.Leu560Leu	gene
28283	p2_2_S2	2	21017	0	100	99	1	1.0101	A	T	stop_gained	HIGH	MPN018	p.Lys565*	gene
28284	p2_2_S2	2	21029	0	96	95	1	1.05263	A	T	missense_variant	MODERATE	MPN018	p.Ser569Cys	gene
28285	p2_2_S2	2	21031	0	97	96	1	1.04167	TCA	CCT	missense_variant	MODERATE	MPN018	p.Gln570Leu	gene
28286	p2_2_S2	2	21050	5.36407e-15	97	96	1	1.04167	AAGTA	TAGTG	stop_gained	HIGH	MPN018	p.LysTyr576*	gene
28287	p2_2_S2	2	21055	8.66388e-17	94	93	1	1.07527	CGCG	TGCA	synonymous_variant	LOW	MPN018	p.579	gene
28288	p2_2_S2	2	21063	0	98	94	4	4.25532	AAATTAT	GAACTGT	missense_variant	MODERATE	MPN018	p.LysIleMet580ArgThrVal	gene
28289	p2_2_S2	2	21075	1.60494e-15	92	91	1	1.0989	T	C	missense_variant	MODERATE	MPN018	p.Ile584Thr	gene
28290	p2_2_S2	2	21081	6.7955e-15	89	88	1	1.13636	A	T	missense_variant	MODERATE	MPN018	p.Asn586Ile	gene
28291	p2_2_S2	2	21083	0	86	85	1	1.17647	G	A	missense_variant	MODERATE	MPN018	p.Gly587Ser	gene
28292	p2_2_S2	2	21091	1.47966e-14	84	80	4	5	T	G	missense_variant	MODERATE	MPN018	p.Ile589Met	gene
28293	p2_2_S2	2	21131	3.52629e-15	79	78	1	1.28205	G	A	missense_variant	MODERATE	MPN018	p.Asp603Asn	gene
28294	p2_2_S2	2	21134	0	80	79	1	1.26582	A	C	missense_variant	MODERATE	MPN018	p.Ile604Leu	gene
28295	p2_2_S2	2	21152	2.12453e-15	78	77	1	1.2987	CAAGC	CAGC	frameshift_variant	HIGH	MPN018	p.Ala611fs	gene
28296	p2_2_S2	2	21209	1.89876e-15	74	73	1	1.36986	T	C	synonymous_variant	LOW	MPN019	p.Asn34Asn	gene
28297	p2_2_S2	2	21216	0	81	80	1	1.25	AAG	CAC	missense_variant	MODERATE	MPN019	p.Lys37His	gene
28298	p2_2_S2	2	21251	0	94	93	1	1.07527	T	A	synonymous_variant	LOW	MPN019	p.Gly48Gly	gene
28299	p2_2_S2	2	21255	4.54383e-17	100	99	1	1.0101	A	G	missense_variant	MODERATE	MPN019	p.Thr50Ala	gene
28300	p2_2_S2	2	21270	3.38292e-15	88	87	1	1.14943	C	T	synonymous_variant	LOW	MPN019	p.Leu55Leu	gene
28301	p2_2_S2	2	21276	3.38292e-15	88	87	1	1.14943	G	A	missense_variant	MODERATE	MPN019	p.Val57Ile	gene
28302	p2_2_S2	2	21277	0	85	84	1	1.19048	T	C	missense_variant	MODERATE	MPN019	p.Val57Ala	gene
28303	p2_2_S2	2	21283	2.63707e-15	81	80	1	1.25	T	C	missense_variant	MODERATE	MPN019	p.Val59Ala	gene
28304	p2_2_S2	2	21290	2.01176e-15	81	80	1	1.25	CATCT	TATCA	missense_variant	MODERATE	MPN019	p.Phe63Ile	gene
28305	p2_2_S2	2	21354	0	88	87	1	1.14943	TTT	CTA	missense_variant	MODERATE	MPN019	p.Phe83Leu	gene
28306	p2_2_S2	2	21365	0	86	85	1	1.17647	T	C	synonymous_variant	LOW	MPN019	p.Thr86Thr	gene
28307	p2_2_S2	2	21370	0	87	86	1	1.16279	C	T	missense_variant	MODERATE	MPN019	p.Thr88Ile	gene
28308	p2_2_S2	2	21372	3.38292e-15	88	87	1	1.14943	G	A	missense_variant	MODERATE	MPN019	p.Glu89Lys	gene
28309	p2_2_S2	2	21375	8.55323e-16	85	84	1	1.19048	A	C	missense_variant	MODERATE	MPN019	p.Thr90Pro	gene
28310	p2_2_S2	2	21380	0	90	89	1	1.1236	T	C	synonymous_variant	LOW	MPN019	p.Asp91Asp	gene
28311	p2_2_S2	2	21383	4.30228e-15	93	91	2	2.1978	T	A	synonymous_variant	LOW	MPN019	p.Gly92Gly	gene
28312	p2_2_S2	2	21392	0	93	91	2	2.1978	AGT	GGA	missense_variant	MODERATE	MPN019	p.Val96Glu	gene
28313	p2_2_S2	2	21405	3.61646e-15	92	91	1	1.0989	G	A	missense_variant	MODERATE	MPN019	p.Val100Ile	gene
28314	p2_2_S2	2	21421	2.94643e-15	94	93	1	1.07527	TAC	CAG	missense_variant	MODERATE	MPN019	p.LeuPro105SerAla	gene
28315	p2_2_S2	2	21437	3.29251e-15	85	84	1	1.19048	CTT	GTA	stop_gained	HIGH	MPN019	p.Leu111*	gene
28316	p2_2_S2	2	21447	0	86	85	1	1.17647	G	A	missense_variant	MODERATE	MPN019	p.Val114Ile	gene
28317	p2_2_S2	2	21463	0	90	89	1	1.1236	T	C	missense_variant	MODERATE	MPN019	p.Val119Ala	gene
28318	p2_2_S2	2	21492	0	93	92	1	1.08696	A	T	missense_variant	MODERATE	MPN019	p.Asn129Tyr	gene
28319	p2_2_S2	2	21520	0	105	104	1	0.961538	AGCTGTACCA	TTTTGTTCTT	missense_variant	MODERATE	MPN019	p.LysLeuTyrGln138IleLeuPheLeu	gene
28320	p2_2_S2	2	21534	3.31511e-15	110	109	1	0.917431	A	G	missense_variant	MODERATE	MPN019	p.Ile143Val	gene
28321	p2_2_S2	2	21545	2.22247e-15	108	107	1	0.934579	G	C	missense_variant	MODERATE	MPN019	p.Leu146Phe	gene
28322	p2_2_S2	2	21548	0	103	102	1	0.980392	G	A	synonymous_variant	LOW	MPN019	p.Leu147Leu	gene
28323	p2_2_S2	2	21553	2.41859e-15	109	107	2	1.86916	G	A	stop_gained	HIGH	MPN019	p.Trp149*	gene
28324	p2_2_S2	2	21578	6.91627e-15	103	101	2	1.9802	TA	CT	missense_variant	MODERATE	MPN019	p.Met158Leu	gene
28325	p2_2_S2	2	21589	1.44696e-15	101	100	1	1	G	T	missense_variant	MODERATE	MPN019	p.Ser161Ile	gene
28326	p2_2_S2	2	21610	0	104	103	1	0.970874	A	G	missense_variant	MODERATE	MPN019	p.Asn168Ser	gene
28327	p2_2_S2	2	21626	0	99	97	2	2.06186	T	A	missense_variant	MODERATE	MPN019	p.Ser173Arg	gene
28328	p2_2_S2	2	21643	3.37161e-15	97	96	1	1.04167	TTT	ATA	missense_variant	MODERATE	MPN019	p.ValTyr179AspAsn	gene
28329	p2_2_S2	2	21663	4.72393e-15	90	89	1	1.1236	TAT	GAA	missense_variant	MODERATE	MPN019	p.Tyr186Glu	gene
28330	p2_2_S2	2	21684	0	97	95	2	2.10526	ACAATTC	TCATTTT	stop_gained	HIGH	MPN019	p.ThrIleGln193*	gene
28331	p2_2_S2	2	21709	1.82342e-15	96	95	1	1.05263	T	C	missense_variant	MODERATE	MPN019	p.Met201Thr	gene
28332	p2_2_S2	2	21720	0	94	92	2	2.17391	A	G	missense_variant	MODERATE	MPN019	p.Thr205Ala	gene
28333	p2_2_S2	2	21729	0	91	89	2	2.24719	TTTGTT	TATGTA	missense_variant	MODERATE	MPN019	p.Phe208Tyr	gene
28334	p2_2_S2	2	21743	0	98	96	2	2.08333	A	G	synonymous_variant	LOW	MPN019	p.Pro212Pro	gene
28335	p2_2_S2	2	21745	2.53936e-15	97	95	2	2.10526	T	C	missense_variant	MODERATE	MPN019	p.Val213Ala	gene
28336	p2_2_S2	2	21761	3.23954e-15	97	96	1	1.04167	G	A	synonymous_variant	LOW	MPN019	p.Ser218Ser	gene
28337	p2_2_S2	2	21765	0	98	97	1	1.03093	A	G	missense_variant	MODERATE	MPN019	p.Thr220Ala	gene
28338	p2_2_S2	2	21769	1.47309e-15	101	100	1	1	T	C	missense_variant	MODERATE	MPN019	p.Val221Ala	gene
28339	p2_2_S2	2	21794	2.35832e-15	99	98	1	1.02041	C	G	synonymous_variant	LOW	MPN019	p.Ser229Ser	gene
28340	p2_2_S2	2	21801	6.56972e-15	100	98	2	2.04082	TTTTTA	ATTTAG	stop_gained	HIGH	MPN019	p.PheLeu232*	gene
28341	p2_2_S2	2	21835	5.1536e-15	84	83	1	1.20482	T	C	missense_variant	MODERATE	MPN019	p.Val243Ala	gene
28342	p2_2_S2	2	21839	0	82	81	1	1.23457	A	G	synonymous_variant	LOW	MPN019	p.Gln244Gln	gene
28343	p2_2_S2	2	21845	5.12534e-16	90	89	1	1.1236	CT	TC	synonymous_variant	LOW	MPN019	p.248	gene
28344	p2_2_S2	2	21865	1.82342e-15	96	95	1	1.05263	A	G	missense_variant	MODERATE	MPN019	p.Tyr253Cys	gene
28345	p2_2_S2	2	21880	0	91	89	2	2.24719	T	A	stop_gained	HIGH	MPN019	p.Leu258*	gene
28346	p2_2_S2	2	21886	0	91	90	1	1.11111	A	G	missense_variant	MODERATE	MPN019	p.Asn260Ser	gene
28347	p2_2_S2	2	21945	0	82	81	1	1.23457	T	A	missense_variant	MODERATE	MPN019	p.Tyr280Asn	gene
28348	p2_2_S2	2	21982	0	89	88	1	1.13636	A	C	missense_variant	MODERATE	MPN019	p.Asn292Thr	gene
28349	p2_2_S2	2	21996	8.28719e-17	87	85	2	2.35294	TTTAT	ATTAC	missense_variant	MODERATE	MPN019	p.PheIle297IleThr	gene
28350	p2_2_S2	2	22004	3.75207e-15	83	82	1	1.21951	C	A	stop_gained	HIGH	MPN019	p.Tyr299*	gene
28351	p2_2_S2	2	22028	0	89	88	1	1.13636	TA	AT	missense_variant	MODERATE	MPN019	p.AsnIle307LysPhe	gene
28352	p2_2_S2	2	22046	0	82	79	3	3.79747	GATCT	AATCA	missense_variant	MODERATE	MPN019	p.Ser315Thr	gene
28353	p2_2_S2	2	22058	1.76315e-15	83	82	1	1.21951	C	G	synonymous_variant	LOW	MPN019	p.Ala317Ala	gene
28354	p2_2_S2	2	22070	2.49769e-15	90	89	1	1.1236	T	G	missense_variant	MODERATE	MPN019	p.Ser321Arg	gene
28355	p2_2_S2	2	22078	1.89876e-15	74	73	1	1.36986	A	T	missense_variant	MODERATE	MPN019	p.Asn324Ile	gene
28356	p2_2_S2	2	22083	0	84	83	1	1.20482	CCC	TCG	missense_variant	MODERATE	MPN019	p.Pro326Ser	gene
28357	p2_2_S2	2	22089	0	86	85	1	1.17647	T	C	missense_variant	MODERATE	MPN019	p.Phe328Leu	gene
28358	p2_2_S2	2	22090	0	86	85	1	1.17647	T	C	missense_variant	MODERATE	MPN019	p.Phe328Ser	gene
28359	p2_2_S2	2	22104	1.97409e-15	87	86	1	1.16279	A	T	missense_variant	MODERATE	MPN019	p.Ile333Phe	gene
28360	p2_2_S2	2	22106	0	82	81	1	1.23457	TAACT	CAACA	missense_variant	MODERATE	MPN019	p.Tyr335Asn	gene
28361	p2_2_S2	2	22125	6.10286e-15	89	87	2	2.29885	T	C	missense_variant	MODERATE	MPN019	p.Ser340Pro	gene
28362	p2_2_S2	2	22140	0	81	80	1	1.25	T	C	synonymous_variant	LOW	MPN019	p.Leu345Leu	gene
28363	p2_2_S2	2	22142	0	85	84	1	1.19048	A	T	missense_variant	MODERATE	MPN019	p.Leu345Phe	gene
28364	p2_2_S2	2	22156	0	86	85	1	1.17647	T	C	missense_variant	MODERATE	MPN019	p.Leu350Pro	gene
28365	p2_2_S2	2	22169	3.38292e-15	88	87	1	1.14943	G	A	synonymous_variant	LOW	MPN019	p.Gln354Gln	gene
28366	p2_2_S2	2	22173	1.63531e-15	92	91	1	1.0989	TTT	GTC	missense_variant	MODERATE	MPN019	p.Phe356Val	gene
28367	p2_2_S2	2	22177	0	90	89	1	1.1236	GCTT	ACTA	stop_gained	HIGH	MPN019	p.SerLeu357*	gene
28368	p2_2_S2	2	22185	0	89	88	1	1.13636	A	T	missense_variant	MODERATE	MPN019	p.Asn360Tyr	gene
28369	p2_2_S2	2	22192	0	95	94	1	1.06383	T	C	missense_variant	MODERATE	MPN019	p.Ile362Thr	gene
28370	p2_2_S2	2	22198	7.353e-15	96	95	1	1.05263	TAG	AAC	stop_gained	HIGH	MPN019	p.LeuGly364*	gene
28371	p2_2_S2	2	22211	0	95	93	2	2.15054	T	A	missense_variant	MODERATE	MPN019	p.Ser368Arg	gene
28372	p2_2_S2	2	22221	0	87	86	1	1.16279	GT	AA	missense_variant	MODERATE	MPN019	p.Val372Asn	gene
28373	p2_2_S2	2	22223	0	90	89	1	1.1236	C	T	synonymous_variant	LOW	MPN019	p.Val372Val	gene
28374	p2_2_S2	2	22237	7.68496e-15	91	89	2	2.24719	A	T	missense_variant	MODERATE	MPN019	p.Asp377Val	gene
28375	p2_2_S2	2	22281	0	85	83	2	2.40964	A	C	missense_variant	MODERATE	MPN019	p.Asn392His	gene
28376	p2_2_S2	2	22317	0	80	79	1	1.26582	T	A	missense_variant	MODERATE	MPN019	p.Phe404Ile	gene
28377	p2_2_S2	2	22322	0	82	81	1	1.23457	T	A	synonymous_variant	LOW	MPN019	p.Gly405Gly	gene
28378	p2_2_S2	2	22328	3.72194e-15	83	81	2	2.46914	TGCG	AGCA	missense_variant	MODERATE	MPN019	p.Ser407Arg	gene
28379	p2_2_S2	2	22334	0	81	80	1	1.25	C	G	missense_variant	MODERATE	MPN019	p.Asp409Glu	gene
28380	p2_2_S2	2	22341	0	80	79	1	1.26582	A	G	missense_variant	MODERATE	MPN019	p.Ile412Val	gene
28381	p2_2_S2	2	22351	0	73	72	1	1.38889	G	A	missense_variant	MODERATE	MPN019	p.Gly415Glu	gene
28382	p2_2_S2	2	22377	0	80	79	1	1.26582	GACAT	AACAC	missense_variant	MODERATE	MPN019	p.AspIle424AsnThr	gene
28383	p2_2_S2	2	22391	0	76	75	1	1.33333	A	G	missense_variant	MODERATE	MPN019	p.Ile428Met	gene
28384	p2_2_S2	2	22408	2.64484e-15	81	80	1	1.25	C	G	missense_variant	MODERATE	MPN019	p.Ala434Gly	gene
28385	p2_2_S2	2	22422	7.3231e-15	75	74	1	1.35135	A	C	missense_variant	MODERATE	MPN019	p.Ile439Leu	gene
28386	p2_2_S2	2	22473	3.39257e-16	82	81	1	1.23457	A	C	missense_variant	MODERATE	MPN019	p.Met456Leu	gene
28387	p2_2_S2	2	22505	0	93	91	2	2.1978	A	G	synonymous_variant	LOW	MPN019	p.Glu466Glu	gene
28388	p2_2_S2	2	22593	0	73	72	1	1.38889	C	T	stop_gained	HIGH	MPN019	p.Gln496*	gene
28389	p2_2_S2	2	22608	0	79	77	2	2.5974	G	A	missense_variant	MODERATE	MPN019	p.Glu501Lys	gene
28390	p2_2_S2	2	22614	0	80	79	1	1.26582	A	G	missense_variant	MODERATE	MPN019	p.Ile503Val	gene
28391	p2_2_S2	2	22621	0	81	80	1	1.25	A	G	missense_variant	MODERATE	MPN019	p.Glu505Gly	gene
28392	p2_2_S2	2	22656	8.55323e-16	85	84	1	1.19048	A	T	missense_variant	MODERATE	MPN019	p.Met517Leu	gene
28393	p2_2_S2	2	22665	2.76514e-15	91	90	1	1.11111	CCCCAA	TCCCTT	missense_variant	MODERATE	MPN019	p.ProGln520SerLeu	gene
28394	p2_2_S2	2	22678	1.61247e-15	92	91	1	1.0989	A	T	missense_variant	MODERATE	MPN019	p.Asn524Ile	gene
28395	p2_2_S2	2	22693	2.26485e-16	85	84	1	1.19048	ACAA	GCAT	missense_variant	MODERATE	MPN019	p.AsnLys529SerIle	gene
28396	p2_2_S2	2	22700	0	89	88	1	1.13636	T	C	synonymous_variant	LOW	MPN019	p.Thr531Thr	gene
28397	p2_2_S2	2	22715	0	95	94	1	1.06383	CGGT	TGGA	synonymous_variant	LOW	MPN019	p.538	gene
28398	p2_2_S2	2	22727	0	97	95	2	2.10526	A	G	synonymous_variant	LOW	MPN019	p.Gln540Gln	gene
28399	p2_2_S2	2	22768	8.81926e-16	96	93	3	3.22581	TGTTATT	CGCTATT	missense_variant	MODERATE	MPN019	p.Val554Ala	gene
28400	p2_2_S2	2	22784	2.50546e-15	90	89	1	1.1236	A	G	synonymous_variant	LOW	MPN019	p.Glu559Glu	gene
28401	p2_2_S2	2	22791	5.39444e-15	88	87	1	1.14943	A	G	missense_variant	MODERATE	MPN019	p.Ser562Gly	gene
28402	p2_2_S2	2	22806	0	86	85	1	1.17647	C	T	missense_variant	MODERATE	MPN019	p.His567Tyr	gene
28403	p2_2_S2	2	22822	0	74	73	1	1.36986	TCCAACA	CCCAGCT	missense_variant	MODERATE	MPN019	p.IleGlnGln572ThrGlnLeu	gene
28404	p2_2_S2	2	22831	2.78774e-15	76	74	2	2.7027	C	G	missense_variant	MODERATE	MPN019	p.Ser575Trp	gene
28405	p2_2_S2	2	22840	3.6765e-15	67	66	1	1.51515	GACTA	CACTG	missense_variant	MODERATE	MPN019	p.Arg578Thr	gene
28406	p2_2_S2	2	22853	0	77	76	1	1.31579	T	A	missense_variant	MODERATE	MPN019	p.Asp582Glu	gene
28407	p2_2_S2	2	22855	7.83751e-16	74	73	1	1.36986	AAACATCG	TATCACCA	missense_variant	MODERATE	MPN019	p.LysThrSer583IleSerPro	gene
28408	p2_2_S2	2	22864	0	88	87	1	1.14943	TTATA	GTATG	missense_variant	MODERATE	MPN019	p.PheIle586CysMet	gene
28409	p2_2_S2	2	22901	0	77	76	1	1.31579	G	A	synonymous_variant	LOW	MPN019	p.Ala598Ala	gene
28410	p2_2_S2	2	22916	0	76	75	1	1.33333	G	A	synonymous_variant	LOW	MPN019	p.Val603Val	gene
28411	p2_2_S2	2	22933	0	81	80	1	1.25	T	C	missense_variant	MODERATE	MPN019	p.Val609Ala	gene
28412	p2_2_S2	2	22939	3.7443e-15	83	82	1	1.21951	A	T	missense_variant	MODERATE	MPN019	p.Glu611Val	gene
28413	p2_2_S2	2	22948	0	86	82	4	4.87805	A	G	missense_variant	MODERATE	MPN019	p.Asn614Ser	gene
28414	p2_2_S2	2	22970	0	86	85	1	1.17647	A	G	synonymous_variant	LOW	MPN019	p.Gln621Gln	gene
28415	p2_2_S2	2	22981	7.16442e-15	84	83	1	1.20482	A	T	missense_variant	MODERATE	MPN019	p.Tyr625Phe	gene
28416	p2_2_S2	2	23008	3.23954e-16	91	90	1	1.11111	AGTA	GGTT	upstream_gene_variant	MODIFIER	MPN016	c.-4806_-4803delTACTinsAACC	intergenic
28417	p2_2_S2	2	23032	5.98961e-15	90	88	2	2.27273	CTGAAATAAG	TTGTAATAAG	missense_variant	MODERATE	MPN020	p.AlaGlu4ValVal	gene
28418	p2_2_S2	2	23046	5.94935e-16	85	82	3	3.65854	TTTGC	TATAC	missense_variant	MODERATE	MPN020	p.PheAla9TyrThr	gene
28419	p2_2_S2	2	23063	0	74	72	2	2.77778	AAAGTTT	GGAGGTG	missense_variant	MODERATE	MPN020	p.LysPhe15GluVal	gene
28420	p2_2_S2	2	23078	0	76	75	1	1.33333	G	A	synonymous_variant	LOW	MPN020	p.Ala19Ala	gene
28421	p2_2_S2	2	23086	0	80	79	1	1.26582	TGTTTGAG	AGTTAGAA	missense_variant	MODERATE	MPN020	p.LeuPhe22GlnLeu	gene
28422	p2_2_S2	2	23115	5.09309e-15	83	80	3	3.75	AAAAA	TAGAA	stop_gained	HIGH	MPN020	p.Lys32*	gene
28423	p2_2_S2	2	23128	0	88	86	2	2.32558	ATAAGGCG	TTATGGCG	missense_variant	MODERATE	MPN020	p.AsnLys36IleMet	gene
28424	p2_2_S2	2	23139	0	89	88	1	1.13636	GGCAT	AGCAA	missense_variant	MODERATE	MPN020	p.GlyMet40SerLys	gene
28425	p2_2_S2	2	23147	6.80326e-15	89	88	1	1.13636	T	A	synonymous_variant	LOW	MPN020	p.Ala42Ala	gene
28426	p2_2_S2	2	23152	0	87	86	1	1.16279	T	A	missense_variant	MODERATE	MPN020	p.Val44Glu	gene
28427	p2_2_S2	2	23156	3.23954e-15	97	96	1	1.04167	G	T	missense_variant	MODERATE	MPN020	p.Leu45Phe	gene
28428	p2_2_S2	2	23158	0	89	87	2	2.29885	ACAA	TCAT	missense_variant	MODERATE	MPN020	p.TyrAsn46PheIle	gene
28429	p2_2_S2	2	23167	1.04014e-15	81	79	2	2.53165	AGGTCAT	AGGCCGA	missense_variant	MODERATE	MPN020	p.ValIle50AlaAsp	gene
28430	p2_2_S2	2	23176	0	81	79	2	2.53165	A	G	missense_variant	MODERATE	MPN020	p.Lys52Arg	gene
28431	p2_2_S2	2	23195	7.01421e-15	92	91	1	1.0989	AGATGGT	GGACGGA	synonymous_variant	LOW	MPN020	p.61	gene
28432	p2_2_S2	2	23213	0	98	97	1	1.03093	TAAGT	ACAGC	missense_variant	MODERATE	MPN020	p.CysLysCys64TrpGlnArg	gene
28433	p2_2_S2	2	23243	2.34019e-16	85	84	1	1.19048	CTGCG	TTGCA	missense_variant	MODERATE	MPN020	p.Val76Met	gene
28434	p2_2_S2	2	23249	7.16442e-15	84	83	1	1.20482	G	A	synonymous_variant	LOW	MPN020	p.Val76Val	gene
28435	p2_2_S2	2	23251	3.46791e-16	82	81	1	1.23457	A	G	missense_variant	MODERATE	MPN020	p.His77Arg	gene
28436	p2_2_S2	2	23295	0	86	85	1	1.17647	T	A	missense_variant	MODERATE	MPN020	p.Ser92Thr	gene
28437	p2_2_S2	2	23298	7.16442e-15	84	83	1	1.20482	A	T	stop_gained	HIGH	MPN020	p.Lys93*	gene
28438	p2_2_S2	2	23303	0	81	80	1	1.25	CAGT	TAGA	missense_variant	MODERATE	MPN020	p.Ser95Arg	gene
28439	p2_2_S2	2	23317	3.52629e-15	88	87	1	1.14943	CTG	GTA	missense_variant	MODERATE	MPN020	p.AlaGlu99GlyLys	gene
28440	p2_2_S2	2	23387	0	86	84	2	2.38095	CGGGG	CAGGA	missense_variant	MODERATE	MPN020	p.GlyGly123ArgArg	gene
28441	p2_2_S2	2	23444	0	67	66	1	1.51515	A	G	synonymous_variant	LOW	MPN020	p.Gln141Gln	gene
28442	p2_2_S2	2	23445	9.80949e-15	65	64	1	1.5625	CCG	TCA	missense_variant	MODERATE	MPN020	p.Pro142Ser	gene
28443	p2_2_S2	2	23458	0	67	66	1	1.51515	G	A	missense_variant	MODERATE	MPN020	p.Arg146His	gene
28444	p2_2_S2	2	23465	0	66	64	2	3.125	TTGT	ATGA	stop_gained	HIGH	MPN020	p.TyrCys148*	gene
28445	p2_2_S2	2	23473	0	76	74	2	2.7027	AT	TA	missense_variant	MODERATE	MPN020	p.Asp151Val	gene
28446	p2_2_S2	2	23478	0	72	68	4	5.88235	A	G	missense_variant	MODERATE	MPN020	p.Thr153Ala	gene
28447	p2_2_S2	2	23482	2.27521e-15	69	68	1	1.47059	T	C	missense_variant	MODERATE	MPN020	p.Phe154Ser	gene
28448	p2_2_S2	2	23493	5.80833e-15	70	69	1	1.44928	CTTC	TTTT	missense_variant	MODERATE	MPN020	p.LeuHis158PheTyr	gene
28449	p2_2_S2	2	23522	0	71	70	1	1.42857	AGTCG	TGTCC	missense_variant	MODERATE	MPN020	p.Glu169Gln	gene
28450	p2_2_S2	2	23553	3.76926e-16	76	75	1	1.33333	CGCG	GGCC	missense_variant	MODERATE	MPN020	p.ArgAla178GlyPro	gene
28451	p2_2_S2	2	23565	3.54089e-16	82	81	1	1.23457	C	G	missense_variant	MODERATE	MPN020	p.Leu182Val	gene
28452	p2_2_S2	2	23572	0	75	73	2	2.73973	TTGAT	ATGAC	missense_variant	MODERATE	MPN020	p.Phe184Tyr	gene
28453	p2_2_S2	2	23683	2.64484e-15	81	80	1	1.25	T	G	missense_variant	MODERATE	MPN020	p.Val221Gly	gene
28454	p2_2_S2	2	23687	1.20541e-16	78	77	1	1.2987	T	A	missense_variant	MODERATE	MPN020	p.Phe222Leu	gene
28455	p2_2_S2	2	23688	0	81	79	2	2.53165	A	T	missense_variant	MODERATE	MPN020	p.Asn223Tyr	gene
28456	p2_2_S2	2	23726	0	73	72	1	1.38889	T	A	synonymous_variant	LOW	MPN020	p.Ile235Ile	gene
28457	p2_2_S2	2	23741	3.75207e-15	83	82	1	1.21951	T	G	missense_variant	MODERATE	MPN020	p.His240Gln	gene
28458	p2_2_S2	2	23745	1.86109e-15	90	89	1	1.1236	TTAA	CTAG	missense_variant	MODERATE	MPN020	p.Asn243Asp	gene
28459	p2_2_S2	2	23755	0	80	79	1	1.26582	TTTGT	ATAGA	missense_variant	MODERATE	MPN020	p.ValCys245AspArg	gene
28460	p2_2_S2	2	23788	0	88	86	2	2.32558	TTGTT	ATGAA	missense_variant	MODERATE	MPN020	p.PheVal256TyrGlu	gene
28461	p2_2_S2	2	23794	5.13806e-15	93	91	2	2.1978	CTTAT	GTTAA	stop_gained	HIGH	MPN020	p.ThrTyr258*	gene
28462	p2_2_S2	2	23819	0	81	80	1	1.25	T	G	missense_variant	MODERATE	MPN020	p.Ile266Met	gene
28463	p2_2_S2	2	23825	2.01176e-15	81	80	1	1.25	GCGC	ACAG	missense_variant	MODERATE	MPN020	p.Arg269Gln	gene
28464	p2_2_S2	2	23873	4.97467e-16	90	89	1	1.1236	CATTAAC	TACTAAT	missense_variant	MODERATE	MPN020	p.Ile285Thr	gene
28465	p2_2_S2	2	23922	1.60847e-15	87	86	1	1.16279	TTAA	CTAG	missense_variant	MODERATE	MPN020	p.Ile302Val	gene
28466	p2_2_S2	2	23944	0	89	88	1	1.13636	G	C	missense_variant	MODERATE	MPN020	p.Gly308Ala	gene
28467	p2_2_S2	2	23957	1.59764e-15	92	91	1	1.0989	C	T	synonymous_variant	LOW	MPN020	p.Phe312Phe	gene
28468	p2_2_S2	2	23967	0	99	98	1	1.02041	A	T	missense_variant	MODERATE	MPN020	p.Ser316Cys	gene
28469	p2_2_S2	2	23999	0	104	103	1	0.970874	C	G	stop_gained	HIGH	MPN020	p.Tyr326*	gene
28470	p2_2_S2	2	24013	6.98431e-15	92	91	1	1.0989	ACTT	GCTG	missense_variant	MODERATE	MPN020	p.TyrPhe331CysCys	gene
28471	p2_2_S2	2	24017	0	89	88	1	1.13636	T	A	missense_variant	MODERATE	MPN020	p.Phe332Leu	gene
28472	p2_2_S2	2	24069	0	81	80	1	1.25	A	T	stop_gained	HIGH	MPN020	p.Lys350*	gene
28473	p2_2_S2	2	24074	5.1536e-15	84	83	1	1.20482	C	A	stop_gained	HIGH	MPN020	p.Tyr351*	gene
28474	p2_2_S2	2	24077	0	86	85	1	1.17647	G	A	synonymous_variant	LOW	MPN020	p.Lys352Lys	gene
28475	p2_2_S2	2	24079	3.39257e-16	82	81	1	1.23457	A	C	missense_variant	MODERATE	MPN020	p.Asn353Thr	gene
28476	p2_2_S2	2	24090	0	78	77	1	1.2987	AAGGGCA	TAGAGCT	stop_gained	HIGH	MPN020	p.LysGlyThr357*	gene
28477	p2_2_S2	2	24104	1.75538e-15	83	82	1	1.21951	G	A	synonymous_variant	LOW	MPN020	p.Thr361Thr	gene
28478	p2_2_S2	2	24115	2.6486e-15	76	75	1	1.33333	ACCG	TCGA	missense_variant	MODERATE	MPN020	p.HisArg365LeuAsp	gene
28479	p2_2_S2	2	24185	0	79	78	1	1.28205	GGAA	AGAG	synonymous_variant	LOW	MPN020	p.390	gene
28480	p2_2_S2	2	24207	2.0944e-15	87	86	1	1.16279	TTT	CTC	missense_variant	MODERATE	MPN020	p.Phe396Leu	gene
28481	p2_2_S2	2	24218	9.1936e-16	95	93	2	2.15054	T	C	synonymous_variant	LOW	MPN020	p.Gly399Gly	gene
28482	p2_2_S2	2	24242	5.52252e-15	91	88	3	3.40909	A	T	synonymous_variant	LOW	MPN020	p.Leu407Leu	gene
28483	p2_2_S2	2	24246	6.82751e-17	80	79	1	1.26582	ATCCAGGACAAAA	TTCTAGATCATAT	stop_gained	HIGH	MPN020	p.IleGlnAspLysAsn409*	gene
28484	p2_2_S2	2	24325	6.25777e-16	77	76	1	1.31579	TATCC	AATCT	stop_gained	HIGH	MPN020	p.Leu435*	gene
28485	p2_2_S2	2	24334	2.34019e-16	85	84	1	1.19048	ACTTA	GCTTT	missense_variant	MODERATE	MPN020	p.AsnLeu438SerPhe	gene
28486	p2_2_S2	2	24343	0	85	84	1	1.19048	A	C	missense_variant	MODERATE	MPN020	p.His441Pro	gene
28487	p2_2_S2	2	24349	0	92	91	1	1.0989	AAC	TAT	missense_variant	MODERATE	MPN020	p.LysPro443IleSer	gene
28488	p2_2_S2	2	24359	3.48839e-15	95	94	1	1.06383	TTTT	ATTA	missense_variant	MODERATE	MPN020	p.HisPhe446GlnLeu	gene
28489	p2_2_S2	2	24363	0	94	93	1	1.07527	G	A	missense_variant	MODERATE	MPN020	p.Ala448Thr	gene
28490	p2_2_S2	2	24368	2.44142e-15	97	95	2	2.10526	GTCT	ATCA	synonymous_variant	LOW	MPN020	p.451	gene
28491	p2_2_S2	2	24404	0	86	85	1	1.17647	A	T	missense_variant	MODERATE	MPN020	p.Gln461His	gene
28492	p2_2_S2	2	24424	0	81	80	1	1.25	C	A	missense_variant	MODERATE	MPN020	p.Pro468His	gene
28493	p2_2_S2	2	24487	3.54089e-15	79	78	1	1.28205	T	A	missense_variant	MODERATE	MPN020	p.Val489Asp	gene
28494	p2_2_S2	2	24568	2.117e-15	78	77	1	1.2987	T	C	missense_variant	MODERATE	MPN020	p.Leu516Ser	gene
28495	p2_2_S2	2	24569	8.22739e-15	75	74	1	1.35135	ACGCA	TCGCT	missense_variant	MODERATE	MPN020	p.LeuArgAsn516PheArgTyr	gene
28496	p2_2_S2	2	24614	0	85	84	1	1.19048	T	C	synonymous_variant	LOW	MPN020	p.Tyr531Tyr	gene
28497	p2_2_S2	2	24618	6.19303e-15	83	81	2	2.46914	TTGTT	ATGTC	missense_variant	MODERATE	MPN020	p.LeuPhe533MetSer	gene
28498	p2_2_S2	2	24640	0	80	79	1	1.26582	TTAGTCAGT	ATAGACAGA	missense_variant	MODERATE	MPN020	p.PheSerGlnTyr540TyrArgGlnAsn	gene
28499	p2_2_S2	2	24662	0	68	67	1	1.49254	A	G	synonymous_variant	LOW	MPN020	p.Lys547Lys	gene
28500	p2_2_S2	2	24715	0	77	76	1	1.31579	T	C	missense_variant	MODERATE	MPN020	p.Val565Ala	gene
28501	p2_2_S2	2	24718	1.24543e-16	78	77	1	1.2987	T	C	missense_variant	MODERATE	MPN020	p.Phe566Ser	gene
28502	p2_2_S2	2	24734	2.63707e-15	76	74	2	2.7027	ACACAAAAA	TCTCAATAG	missense_variant	MODERATE	MPN020	p.GluHisLysLys571AspLeuAsnArg	gene
28503	p2_2_S2	2	24746	0	81	79	2	2.53165	TACTT	CACTA	missense_variant	MODERATE	MPN020	p.Ser577Thr	gene
28504	p2_2_S2	2	24756	2.78421e-15	81	80	1	1.25	CGC	GGT	missense_variant	MODERATE	MPN020	p.Arg579Gly	gene
28505	p2_2_S2	2	24763	0	80	79	1	1.26582	A	C	missense_variant	MODERATE	MPN020	p.Tyr581Ser	gene
28506	p2_2_S2	2	24770	1.90605e-15	74	73	1	1.36986	A	G	synonymous_variant	LOW	MPN020	p.Gln583Gln	gene
28507	p2_2_S2	2	24776	3.39257e-16	82	81	1	1.23457	A	G	synonymous_variant	LOW	MPN020	p.Gly585Gly	gene
28508	p2_2_S2	2	24789	1.5522e-15	77	75	2	2.66667	CGCGGTTT	AGCAGTTT	missense_variant	MODERATE	MPN020	p.ArgGly590SerSer	gene
28509	p2_2_S2	2	24797	9.41961e-16	72	70	2	2.85714	GGAGGAAAATAAG	AGAGAAAAATAAG	missense_variant	MODERATE	MPN020	p.Glu594Lys	gene
28510	p2_2_S2	2	24820	3.52982e-15	79	78	1	1.28205	T	C	missense_variant	MODERATE	MPN020	p.Ile600Thr	gene
28511	p2_2_S2	2	24822	3.75984e-15	83	82	1	1.21951	C	G	missense_variant	MODERATE	MPN020	p.Leu601Val	gene
28512	p2_2_S2	2	24850	0	98	97	1	1.03093	C	A	missense_variant	MODERATE	MPN020	p.Thr610Lys	gene
28513	p2_2_S2	2	24853	5.65271e-16	103	102	1	0.980392	T	A	missense_variant	MODERATE	MPN020	p.Val611Glu	gene
28514	p2_2_S2	2	24863	5.08556e-15	106	105	1	0.952381	C	G	missense_variant	MODERATE	MPN020	p.Ile614Met	gene
28515	p2_2_S2	2	24895	0	89	88	1	1.13636	A	G	missense_variant	MODERATE	MPN020	p.His625Arg	gene
28516	p2_2_S2	2	24924	1.24543e-16	78	77	1	1.2987	C	T	missense_variant	MODERATE	MPN020	p.Pro635Ser	gene
28517	p2_2_S2	2	24945	0	86	85	1	1.17647	TGAA	CGAT	stop_gained	HIGH	MPN020	p.TrpLys642*	gene
28518	p2_2_S2	2	24975	3.75207e-15	83	82	1	1.21951	C	T	stop_gained	HIGH	MPN020	p.Gln652*	gene
28519	p2_2_S2	2	24979	0	89	88	1	1.13636	TTA	CTG	missense_variant	MODERATE	MPN020	p.IleLys653ThrGlu	gene
28520	p2_2_S2	2	24986	5.38691e-15	88	87	1	1.14943	C	T	synonymous_variant	LOW	MPN020	p.Val655Val	gene
28521	p2_2_S2	2	24991	4.59586e-15	90	89	1	1.1236	TAGCT	CAGCC	missense_variant	MODERATE	MPN020	p.Val657Ala	gene
28522	p2_2_S2	2	25069	7.17195e-15	84	83	1	1.20482	T	A	missense_variant	MODERATE	MPN020	p.Val683Glu	gene
28523	p2_2_S2	2	25071	2.68227e-15	88	86	2	2.32558	T	C	synonymous_variant	LOW	MPN020	p.Leu684Leu	gene
28524	p2_2_S2	2	25076	1.74784e-15	83	82	1	1.21951	C	T	synonymous_variant	LOW	MPN020	p.Arg685Arg	gene
28525	p2_2_S2	2	25082	0	79	78	1	1.28205	TGTGAA	AGAGAT	missense_variant	MODERATE	MPN020	p.AspValLys687GluGluMet	gene
28526	p2_2_S2	2	25097	0	75	74	1	1.35135	CAAACAGC	TAAATAGT	stop_gained	HIGH	MPN020	p.GlnArg694*	gene
28527	p2_2_S2	2	25127	3.52982e-15	79	78	1	1.28205	C	T	synonymous_variant	LOW	MPN020	p.Asp702Asp	gene
28528	p2_2_S2	2	25130	0	77	76	1	1.31579	A	G	synonymous_variant	LOW	MPN020	p.Glu703Glu	gene
28529	p2_2_S2	2	25133	2.64484e-15	81	80	1	1.25	G	C	synonymous_variant	LOW	MPN020	p.Ala704Ala	gene
28530	p2_2_S2	2	25178	0	63	62	1	1.6129	A	G	synonymous_variant	LOW	MPN020	p.Lys719Lys	gene
28531	p2_2_S2	2	25220	5.68049e-15	70	69	1	1.44928	A	G	synonymous_variant	LOW	MPN020	p.Pro733Pro	gene
28532	p2_2_S2	2	25228	3.83471e-15	61	60	1	1.66667	A	G	missense_variant	MODERATE	MPN020	p.Asn736Ser	gene
28533	p2_2_S2	2	25230	7.60962e-15	57	56	1	1.78571	C	G	missense_variant	MODERATE	MPN020	p.Arg737Gly	gene
28534	p2_2_S2	2	25240	0	61	60	1	1.66667	A	G	missense_variant	MODERATE	MPN020	p.Asp740Gly	gene
28535	p2_2_S2	2	25244	0	66	65	1	1.53846	T	C	synonymous_variant	LOW	MPN020	p.Leu741Leu	gene
28536	p2_2_S2	2	25257	3.26967e-15	67	66	1	1.51515	GATTT	AATTA	missense_variant	MODERATE	MPN020	p.AspPhe746AsnTyr	gene
28537	p2_2_S2	2	25273	3.25131e-15	63	62	1	1.6129	GCTTTT	ACATTA	missense_variant	MODERATE	MPN020	p.SerPheLeu751AsnIleIle	gene
28538	p2_2_S2	2	25285	0	59	58	1	1.72414	A	G	missense_variant	MODERATE	MPN020	p.Asn755Ser	gene
28539	p2_2_S2	2	25296	0	65	63	2	3.1746	TTTACC	CTCACC	missense_variant	MODERATE	MPN020	p.Phe759Leu	gene
28540	p2_2_S2	2	25321	0	73	72	1	1.38889	A	G	missense_variant	MODERATE	MPN020	p.Lys767Arg	gene
28541	p2_2_S2	2	25323	1.17009e-16	78	77	1	1.2987	A	C	missense_variant	MODERATE	MPN020	p.Thr768Pro	gene
28542	p2_2_S2	2	25341	0	84	83	1	1.20482	TTGT	CTGC	synonymous_variant	LOW	MPN020	p.776	gene
28543	p2_2_S2	2	25345	8.55323e-16	85	84	1	1.19048	T	A	stop_gained	HIGH	MPN020	p.Leu775*	gene
28544	p2_2_S2	2	25352	0	84	82	2	2.43902	G	A	synonymous_variant	LOW	MPN020	p.Gln777Gln	gene
28545	p2_2_S2	2	25368	3.53736e-15	79	78	1	1.28205	ATTTTGC	GTTATGT	missense_variant	MODERATE	MPN020	p.IleLeuArg783ValMetCys	gene
28546	p2_2_S2	2	25436	0	83	82	1	1.21951	AGAA	GGAG	synonymous_variant	LOW	MPN020	p.807	gene
28547	p2_2_S2	2	25456	0	89	88	1	1.13636	A	G	missense_variant	MODERATE	MPN020	p.Gln812Arg	gene
28548	p2_2_S2	2	25463	2.23001e-15	91	89	2	2.24719	GTATG	GAACA	missense_variant	MODERATE	MPN020	p.TyrGlu815AsnLys	gene
28549	p2_2_S2	2	25475	0	85	84	1	1.19048	A	G	synonymous_variant	LOW	MPN020	p.Glu818Glu	gene
28550	p2_2_S2	2	25494	3.39257e-16	82	81	1	1.23457	G	A	missense_variant	MODERATE	MPN020	p.Glu825Lys	gene
28551	p2_2_S2	2	25516	0	84	83	1	1.20482	AGA	GGG	missense_variant	MODERATE	MPN020	p.LysSer832ArgGly	gene
28552	p2_2_S2	2	25520	0	81	80	1	1.25	T	C	synonymous_variant	LOW	MPN020	p.Ser833Ser	gene
28553	p2_2_S2	2	25532	0	86	85	1	1.17647	C	T	synonymous_variant	LOW	MPN020	p.Ile837Ile	gene
28554	p2_2_S2	2	25535	0	85	84	1	1.19048	G	T	missense_variant	MODERATE	MPN020	p.Leu838Phe	gene
28555	p2_2_S2	2	25546	0	85	84	1	1.19048	TG	AC	missense_variant	MODERATE	MPN020	p.Leu842Tyr	gene
28556	p2_2_S2	2	25558	0	86	85	1	1.17647	A	C	missense_variant	MODERATE	MPN020	p.His846Pro	gene
28557	p2_2_S2	2	25572	3.43565e-15	101	99	2	2.0202	CCCA	TCCT	stop_gained	HIGH	MPN020	p.ProLys851*	gene
28558	p2_2_S2	2	25580	2.86308e-15	104	103	1	0.970874	CAGTCAG	TAGACAA	missense_variant	MODERATE	MPN020	p.Ser854Arg	gene
28559	p2_2_S2	2	25588	0	96	95	1	1.05263	GTATT	ATATA	missense_variant	MODERATE	MPN020	p.Gly856Asp	gene
28560	p2_2_S2	2	25593	0	89	88	1	1.13636	TTGGAAA	AAGAAAG	missense_variant	MODERATE	MPN020	p.LeuGluAsn858LysLysAsp	gene
28561	p2_2_S2	2	25612	4.6865e-15	75	74	1	1.35135	AGGA	TGGT	missense_variant	MODERATE	MPN020	p.LysGlu864MetVal	gene
28562	p2_2_S2	2	25622	1.80082e-15	71	70	1	1.42857	TTT	ATA	stop_gained	HIGH	MPN020	p.Leu868*	gene
28563	p2_2_S2	2	25628	3.82741e-15	73	71	2	2.8169	AATTA	TATTG	missense_variant	MODERATE	MPN020	p.GluIleIle869AspIleVal	gene
28564	p2_2_S2	2	25640	0	77	76	1	1.31579	A	T	missense_variant	MODERATE	MPN020	p.Glu873Asp	gene
28565	p2_2_S2	2	25669	0	88	86	2	2.32558	TCT	ACA	missense_variant	MODERATE	MPN020	p.LeuPhe883HisIle	gene
28566	p2_2_S2	2	25680	0	89	88	1	1.13636	TTCAT	ATCAA	missense_variant	MODERATE	MPN020	p.PheIle887IleAsn	gene
28567	p2_2_S2	2	25704	4.82399e-16	100	99	1	1.0101	AAA	TAG	stop_gained	HIGH	MPN020	p.Lys895*	gene
28568	p2_2_S2	2	25716	0	81	80	1	1.25	A	T	stop_gained	HIGH	MPN020	p.Lys899*	gene
28569	p2_2_S2	2	25721	5.09309e-15	81	80	1	1.25	GCA	CCT	missense_variant	MODERATE	MPN020	p.GluGln900AspLeu	gene
28570	p2_2_S2	2	25740	7.29273e-15	84	83	1	1.20482	ATCTT	GTCTC	missense_variant	MODERATE	MPN020	p.IlePhe907ValSer	gene
28571	p2_2_S2	2	25774	8.7816e-16	85	84	1	1.19048	A	C	missense_variant	MODERATE	MPN020	p.His918Pro	gene
28572	p2_2_S2	2	25791	0	93	92	1	1.08696	T	C	missense_variant	MODERATE	MPN020	p.Phe924Leu	gene
28573	p2_2_S2	2	25823	2.83271e-15	94	93	1	1.07527	AGCG	TGCA	missense_variant	MODERATE	MPN020	p.Leu934Phe	gene
28574	p2_2_S2	2	25831	0	94	93	1	1.07527	T	C	missense_variant	MODERATE	MPN020	p.Leu937Ser	gene
28575	p2_2_S2	2	25921	1.95879e-15	87	86	1	1.16279	C	T	missense_variant	MODERATE	MPN020	p.Ala967Val	gene
28576	p2_2_S2	2	26009	0	86	85	1	1.17647	T	C	synonymous_variant	LOW	MPN020	p.Cys996Cys	gene
28577	p2_2_S2	2	26014	7.16442e-15	84	83	1	1.20482	T	G	missense_variant	MODERATE	MPN020	p.Val998Gly	gene
28578	p2_2_S2	2	26085	7.3231e-15	75	74	1	1.35135	A	G	missense_variant	MODERATE	MPN020	p.Asn1022Asp	gene
28579	p2_2_S2	2	26087	0	73	72	1	1.38889	T	C	synonymous_variant	LOW	MPN020	p.Asn1022Asn	gene
28580	p2_2_S2	2	26094	0	67	66	1	1.51515	T	C	synonymous_variant	LOW	MPN020	p.Leu1025Leu	gene
28581	p2_2_S2	2	26099	4.04566e-15	65	64	1	1.5625	A	G	synonymous_variant	LOW	MPN020	p.Leu1026Leu	gene
28582	p2_2_S2	2	26114	0	71	70	1	1.42857	A	G	upstream_gene_variant	MODIFIER	MPN021	c.-46A>G	intergenic
28583	p2_2_S2	2	26126	0	67	66	1	1.51515	T	A	upstream_gene_variant	MODIFIER	MPN021	c.-34T>A	intergenic
28584	p2_2_S2	2	26127	7.45871e-15	66	65	1	1.53846	T	C	upstream_gene_variant	MODIFIER	MPN021	c.-33T>C	intergenic
28585	p2_2_S2	2	26130	2.63919e-16	69	68	1	1.47059	T	C	upstream_gene_variant	MODIFIER	MPN021	c.-30T>C	intergenic
28586	p2_2_S2	2	26131	2.71688e-16	69	68	1	1.47059	A	T	upstream_gene_variant	MODIFIER	MPN021	c.-29A>T	intergenic
28587	p2_2_S2	2	26133	0	71	70	1	1.42857	T	C	upstream_gene_variant	MODIFIER	MPN021	c.-27T>C	intergenic
28588	p2_2_S2	2	26134	0	75	74	1	1.35135	TAA	AAT	upstream_gene_variant	MODIFIER	MPN021	c.-26_-24delTAAinsAAT	intergenic
28589	p2_2_S2	2	26148	0	86	85	1	1.17647	TTA	ATG	upstream_gene_variant	MODIFIER	MPN021	c.-12_-10delTTAinsATG	intergenic
28590	p2_2_S2	2	26151	1.33805e-14	80	79	1	1.26582	AAGTG	GAGTA	upstream_gene_variant	MODIFIER	MPN021	c.-9_-5delAAGTGinsGAGTA	intergenic
28591	p2_2_S2	2	26157	4.52028e-16	73	71	2	2.8169	TAAA	CTAG	initiator_codon_variant	LOW	MPN021	p.Met1?	gene
28592	p2_2_S2	2	26181	0	68	67	1	1.49254	TAT	CAC	missense_variant	MODERATE	MPN021	p.Tyr8His	gene
28593	p2_2_S2	2	26197	0	66	64	2	3.125	GCGTTT	GCATTA	missense_variant	MODERATE	MPN021	p.ValSer14IleThr	gene
28594	p2_2_S2	2	26220	0	66	65	1	1.53846	CAAGAC	CAGAC	frameshift_variant	HIGH	MPN021	p.Asp22fs	gene
28595	p2_2_S2	2	26254	0	76	75	1	1.33333	T	G	missense_variant	MODERATE	MPN021	p.Met32Arg	gene
28596	p2_2_S2	2	26276	0	72	71	1	1.40845	TAAG	CAAC	missense_variant	MODERATE	MPN021	p.Lys40Asn	gene
28597	p2_2_S2	2	26340	3.11947e-15	61	59	2	3.38983	T	G	missense_variant	MODERATE	MPN021	p.Tyr61Asp	gene
28598	p2_2_S2	2	26347	0	67	66	1	1.51515	TCTT	ACTC	missense_variant	MODERATE	MPN021	p.ValLeu63AspSer	gene
28599	p2_2_S2	2	26400	1.20541e-16	78	77	1	1.2987	T	A	missense_variant	MODERATE	MPN021	p.Leu81Ile	gene
28600	p2_2_S2	2	26401	1.05709e-16	78	77	1	1.2987	T	C	missense_variant	MODERATE	MPN021	p.Leu81Ser	gene
28601	p2_2_S2	2	26450	0	77	76	1	1.31579	T	A	missense_variant	MODERATE	MPN021	p.Phe97Leu	gene
28602	p2_2_S2	2	26458	0	86	83	3	3.61446	TCTTT	TCATA	missense_variant	MODERATE	MPN021	p.Phe101Ile	gene
28603	p2_2_S2	2	26465	3.31723e-16	82	81	1	1.23457	T	G	synonymous_variant	LOW	MPN021	p.Gly102Gly	gene
28604	p2_2_S2	2	26474	0	87	86	1	1.16279	TTCGT	ATCGA	missense_variant	MODERATE	MPN021	p.PheSerPhe105LeuSerIle	gene
28605	p2_2_S2	2	26488	3.63883e-15	86	85	1	1.17647	ACGG	TCGA	missense_variant	MODERATE	MPN021	p.AspGly110ValGlu	gene
28606	p2_2_S2	2	26492	7.17195e-15	84	83	1	1.20482	G	T	synonymous_variant	LOW	MPN021	p.Gly111Gly	gene
28607	p2_2_S2	2	26513	2.34019e-16	85	84	1	1.19048	CTTTA	TTTTT	missense_variant	MODERATE	MPN021	p.Ser120Cys	gene
28608	p2_2_S2	2	26566	2.23001e-15	78	77	1	1.2987	TAGAG	AAGAA	stop_gained	HIGH	MPN021	p.Leu136*	gene
28609	p2_2_S2	2	26574	0	81	80	1	1.25	GCG	TCA	missense_variant	MODERATE	MPN021	p.Ala139Ser	gene
28610	p2_2_S2	2	26619	0	83	81	2	2.46914	A	C	missense_variant	MODERATE	MPN021	p.Thr154Pro	gene
28611	p2_2_S2	2	26627	3.81211e-15	83	82	1	1.21951	GATT	CATC	synonymous_variant	LOW	MPN021	p.158	gene
28612	p2_2_S2	2	26641	6.55912e-16	81	80	1	1.25	AA	GT	missense_variant	MODERATE	MPN021	p.Lys161Ser	gene
28613	p2_2_S2	2	26647	1.24543e-16	78	77	1	1.2987	T	C	missense_variant	MODERATE	MPN021	p.Val163Ala	gene
28614	p2_2_S2	2	26652	3.7443e-15	83	82	1	1.21951	T	C	missense_variant	MODERATE	MPN021	p.Cys165Arg	gene
28615	p2_2_S2	2	26661	4.77691e-15	82	79	3	3.79747	TGTG	AGTA	missense_variant	MODERATE	MPN021	p.CysAsp168SerAsn	gene
28616	p2_2_S2	2	26672	0	88	87	1	1.14943	TGGG	AGGA	missense_variant	MODERATE	MPN021	p.Phe171Leu	gene
28617	p2_2_S2	2	26692	0	87	85	2	2.35294	CCGGGATG	TCAGAATG	missense_variant	MODERATE	MPN021	p.ThrGly178IleArg	gene
28618	p2_2_S2	2	26712	7.16183e-16	94	93	1	1.07527	A	G	missense_variant	MODERATE	MPN021	p.Ser185Gly	gene
28619	p2_2_S2	2	26714	0	90	89	1	1.1236	T	G	missense_variant	MODERATE	MPN021	p.Ser185Arg	gene
28620	p2_2_S2	2	26734	0	73	71	2	2.8169	TTTT	ATTA	stop_gained	HIGH	MPN021	p.IleLeu192*	gene
28621	p2_2_S2	2	26817	1.24543e-16	78	77	1	1.2987	A	C	missense_variant	MODERATE	MPN021	p.Lys220Gln	gene
28622	p2_2_S2	2	26837	1.97409e-15	87	86	1	1.16279	T	A	missense_variant	MODERATE	MPN021	p.Cys226Trp	gene
28623	p2_2_S2	2	26846	7.55688e-15	82	79	3	3.79747	TAAGT	AAAGC	missense_variant	MODERATE	MPN021	p.SerLysTyr229ArgLysHis	gene
28624	p2_2_S2	2	26897	3.72947e-15	92	91	1	1.0989	TTACC	ATACT	missense_variant	MODERATE	MPN021	p.His248Tyr	gene
28625	p2_2_S2	2	26906	9.94698e-16	89	85	4	4.70588	T	G	synonymous_variant	LOW	MPN021	p.Gly249Gly	gene
28626	p2_2_S2	2	26921	3.52629e-15	79	78	1	1.28205	T	G	missense_variant	MODERATE	MPN021	p.Asp254Glu	gene
28627	p2_2_S2	2	26925	0	77	76	1	1.31579	CATGGTGG	TATGCTGC	missense_variant	MODERATE	MPN021	p.HisGlyGly256TyrAlaAla	gene
28628	p2_2_S2	2	26936	0	77	76	1	1.31579	T	C	synonymous_variant	LOW	MPN021	p.Asn259Asn	gene
28629	p2_2_S2	2	26947	0	74	73	1	1.36986	GTC	ATT	missense_variant	MODERATE	MPN021	p.GlyHis263AspTyr	gene
28630	p2_2_S2	2	26954	0	75	73	2	2.73973	T	G	synonymous_variant	LOW	MPN021	p.Val265Val	gene
28631	p2_2_S2	2	26981	0	68	67	1	1.49254	A	T	synonymous_variant	LOW	MPN021	p.Val274Val	gene
28632	p2_2_S2	2	26988	0	62	61	1	1.63934	A	G	missense_variant	MODERATE	MPN021	p.Ser277Gly	gene
28633	p2_2_S2	2	26999	2.0492e-15	65	64	1	1.5625	T	A	missense_variant	MODERATE	MPN021	p.Phe280Leu	gene
28634	p2_2_S2	2	27006	3.46932e-15	66	65	1	1.53846	GTTG	ATTC	missense_variant	MODERATE	MPN021	p.ValAsp283IleHis	gene
28635	p2_2_S2	2	27048	0	73	72	1	1.38889	A	G	missense_variant	MODERATE	MPN021	p.Ile297Val	gene
28636	p2_2_S2	2	27072	0	68	67	1	1.49254	G	A	missense_variant	MODERATE	MPN021	p.Glu305Lys	gene
28637	p2_2_S2	2	27073	2.78986e-16	69	68	1	1.47059	A	G	missense_variant	MODERATE	MPN021	p.Glu305Gly	gene
28638	p2_2_S2	2	27084	5.53005e-15	79	78	1	1.28205	T	C	synonymous_variant	LOW	MPN021	p.Leu309Leu	gene
28639	p2_2_S2	2	27105	1.86109e-15	90	89	1	1.1236	AACTT	GACTA	stop_gained	HIGH	MPN021	p.AsnLeu316*	gene
28640	p2_2_S2	2	27116	0	86	85	1	1.17647	T	C	synonymous_variant	LOW	MPN021	p.Ala319Ala	gene
28641	p2_2_S2	2	27145	0	97	96	1	1.04167	TCCCT	CCCCA	missense_variant	MODERATE	MPN021	p.Ile329Thr	gene
28642	p2_2_S2	2	27191	1.74055e-15	92	90	2	2.22222	CGGGG	CAGAG	missense_variant	MODERATE	MPN021	p.Gly345Arg	gene
28643	p2_2_S2	2	27212	3.46579e-15	101	100	1	1	C	A	synonymous_variant	LOW	MPN021	p.Ile351Ile	gene
28644	p2_2_S2	2	27217	3.46579e-15	101	100	1	1	A	T	missense_variant	MODERATE	MPN021	p.Tyr353Phe	gene
28645	p2_2_S2	2	27219	0	105	104	1	0.961538	GCC	ACT	missense_variant	MODERATE	MPN021	p.Ala354Thr	gene
28646	p2_2_S2	2	27243	7.23481e-16	94	93	1	1.07527	C	G	missense_variant	MODERATE	MPN021	p.Pro362Ala	gene
28647	p2_2_S2	2	27254	0	93	92	1	1.08696	CAAGCTCAAGG	ATACCTTAAGC	missense_variant	MODERATE	MPN021	p.LysLeuLysGlu366TyrLeuLysGln	gene
28648	p2_2_S2	2	27266	3.38292e-15	88	87	1	1.14943	A	G	synonymous_variant	LOW	MPN021	p.Glu369Glu	gene
28649	p2_2_S2	2	27274	0	85	84	1	1.19048	A	G	missense_variant	MODERATE	MPN021	p.Lys372Arg	gene
28650	p2_2_S2	2	27289	2.64484e-15	85	83	2	2.40964	T	A	missense_variant	MODERATE	MPN021	p.Val377Glu	gene
28651	p2_2_S2	2	27297	1.74784e-15	83	82	1	1.21951	T	A	missense_variant	MODERATE	MPN021	p.Tyr380Asn	gene
28652	p2_2_S2	2	27307	1.60117e-15	89	88	1	1.13636	CACTT	TAGTA	missense_variant	MODERATE	MPN021	p.AlaLeu383ValVal	gene
28653	p2_2_S2	2	27324	1.93642e-15	95	94	1	1.06383	AAGTC	GAGTT	missense_variant	MODERATE	MPN021	p.LysSer389GluPhe	gene
28654	p2_2_S2	2	27337	6.72039e-15	101	99	2	2.0202	AGTGGT	TGCGGT	missense_variant	MODERATE	MPN022	p.Ser8Cys	gene
28655	p2_2_S2	2	27345	2.34349e-15	99	98	1	1.02041	T	C	synonymous_variant	LOW	MPN022	p.Tyr10Tyr	gene
28656	p2_2_S2	2	27354	1.65791e-15	105	104	1	0.961538	T	G	synonymous_variant	LOW	MPN022	p.Val13Val	gene
28657	p2_2_S2	2	27365	1.82342e-15	96	95	1	1.05263	A	C	missense_variant	MODERATE	MPN022	p.His17Pro	gene
28658	p2_2_S2	2	27369	0	98	97	1	1.03093	G	T	missense_variant	MODERATE	MPN022	p.Glu18Asp	gene
28659	p2_2_S2	2	27404	3.39045e-15	88	87	1	1.14943	A	T	missense_variant	MODERATE	MPN022	p.Lys30Ile	gene
28660	p2_2_S2	2	27409	4.98032e-15	97	96	1	1.04167	GCACT	ACACC	missense_variant	MODERATE	MPN022	p.AlaLeu32ThrPro	gene
28661	p2_2_S2	2	27415	0	106	105	1	0.952381	TAC	AAT	missense_variant	MODERATE	MPN022	p.Tyr34Asn	gene
28662	p2_2_S2	2	27419	0	101	99	2	2.0202	TTCAT	ATCAA	missense_variant	MODERATE	MPN022	p.ValHis35AspGln	gene
28663	p2_2_S2	2	27427	0	95	94	1	1.06383	GGACCAG	AGTCCTA	missense_variant	MODERATE	MPN022	p.GlyProGly38SerProSer	gene
28664	p2_2_S2	2	27450	0	96	95	1	1.05263	GGGT	AGGA	synonymous_variant	LOW	MPN022	p.47	gene
28665	p2_2_S2	2	27455	0	102	101	1	0.990099	G	C	missense_variant	MODERATE	MPN022	p.Cys47Ser	gene
28666	p2_2_S2	2	27457	0	100	99	1	1.0101	TTAA	CTAG	missense_variant	MODERATE	MPN022	p.Lys49Glu	gene
28667	p2_2_S2	2	27464	0	96	95	1	1.05263	A	T	missense_variant	MODERATE	MPN022	p.Tyr50Phe	gene
28668	p2_2_S2	2	27466	3.60116e-15	92	91	1	1.0989	T	A	missense_variant	MODERATE	MPN022	p.Phe51Ile	gene
28669	p2_2_S2	2	27473	0	95	94	1	1.06383	T	A	stop_gained	HIGH	MPN022	p.Leu53*	gene
28670	p2_2_S2	2	27476	0	88	87	1	1.14943	ACACT	TCACA	missense_variant	MODERATE	MPN022	p.Asp54Val	gene
28671	p2_2_S2	2	27495	1.65979e-16	86	85	1	1.17647	GTTAGACC	CTTAAACT	stop_gained	HIGH	MPN022	p.LeuLeuAspGln60*	gene
28672	p2_2_S2	2	27510	0	91	88	3	3.40909	T	C	synonymous_variant	LOW	MPN022	p.Gly65Gly	gene
28673	p2_2_S2	2	27511	3.60116e-15	92	91	1	1.0989	T	G	missense_variant	MODERATE	MPN022	p.Cys66Gly	gene
28674	p2_2_S2	2	27528	0	85	84	1	1.19048	G	T	synonymous_variant	LOW	MPN022	p.Ala71Ala	gene
28675	p2_2_S2	2	27540	1.61247e-15	92	91	1	1.0989	A	C	missense_variant	MODERATE	MPN022	p.Leu75Phe	gene
28676	p2_2_S2	2	27550	0	89	88	1	1.13636	ACTACC	TCTTTT	missense_variant	MODERATE	MPN022	p.ThrThr79SerPhe	gene
28677	p2_2_S2	2	27587	3.13406e-15	76	75	1	1.33333	GCCA	ACCT	missense_variant	MODERATE	MPN022	p.ArgGln91HisLeu	gene
28678	p2_2_S2	2	27596	0	76	75	1	1.33333	T	A	stop_gained	HIGH	MPN022	p.Leu94*	gene
28679	p2_2_S2	2	27599	4.61093e-15	75	73	2	2.73973	A	G	missense_variant	MODERATE	MPN022	p.Lys95Arg	gene
28680	p2_2_S2	2	27609	4.89698e-16	73	72	1	1.38889	T	C	synonymous_variant	LOW	MPN022	p.Arg98Arg	gene
28681	p2_2_S2	2	27624	3.52629e-15	79	78	1	1.28205	T	G	synonymous_variant	LOW	MPN022	p.Gly103Gly	gene
28682	p2_2_S2	2	27627	7.11192e-15	81	79	2	2.53165	TAGT	CAGC	synonymous_variant	LOW	MPN022	p.106	gene
28683	p2_2_S2	2	27631	3.55643e-15	79	78	1	1.28205	T	G	missense_variant	MODERATE	MPN022	p.Trp106Gly	gene
28684	p2_2_S2	2	27648	1.01753e-15	76	75	1	1.33333	C	G	synonymous_variant	LOW	MPN022	p.Ala111Ala	gene
28685	p2_2_S2	2	27669	5.05542e-15	85	82	3	3.65854	TCCCC	ACCGT	stop_gained	HIGH	MPN022	p.HisProGln118*	gene
28686	p2_2_S2	2	27701	0	75	73	2	2.73973	CGCTCT	TGCTGT	missense_variant	MODERATE	MPN022	p.Ala129Val	gene
28687	p2_2_S2	2	27710	0	77	75	2	2.66667	TGGGCCGTG	AAGGCTGTG	stop_gained	HIGH	MPN022	p.LeuGlyArg132*	gene
28688	p2_2_S2	2	27728	6.33311e-16	91	90	1	1.11111	GGGCT	AGGCA	stop_gained	HIGH	MPN022	p.Trp138*	gene
28689	p2_2_S2	2	27739	0	89	88	1	1.13636	CTGT	GTGA	missense_variant	MODERATE	MPN022	p.LeuLeu142ValMet	gene
28690	p2_2_S2	2	27764	0	98	97	1	1.03093	A	T	missense_variant	MODERATE	MPN022	p.Tyr150Phe	gene
28691	p2_2_S2	2	27772	0	89	88	1	1.13636	GAACACC	GACACC	frameshift_variant	HIGH	MPN022	p.Glu153fs	gene
28692	p2_2_S2	2	27845	2.40776e-15	87	86	1	1.16279	ATGAA	GTGAG	missense_variant	MODERATE	MPN022	p.Tyr177Cys	gene
28693	p2_2_S2	2	27855	6.07248e-15	93	90	3	3.33333	GCAAGGT	CCATGGT	missense_variant	MODERATE	MPN022	p.LeuGln180PheHis	gene
28694	p2_2_S2	2	27897	0	89	88	1	1.13636	TTGG	ATGA	synonymous_variant	LOW	MPN022	p.196	gene
28695	p2_2_S2	2	27909	3.13406e-15	76	75	1	1.33333	GGAA	AGAT	missense_variant	MODERATE	MPN022	p.Glu199Asp	gene
28696	p2_2_S2	2	27923	0	89	88	1	1.13636	T	C	missense_variant	MODERATE	MPN022	p.Leu203Pro	gene
28697	p2_2_S2	2	27948	6.72039e-15	81	78	3	3.84615	T	A	missense_variant	MODERATE	MPN022	p.Asp211Glu	gene
28698	p2_2_S2	2	27982	6.61515e-15	68	67	1	1.49254	TTAGCGCTCTTGG	CTAGTAATTATGA	missense_variant	MODERATE	MPN022	p.AlaLeuLeuGlu224ValIleMetLys	gene
28699	p2_2_S2	2	28007	0	76	75	1	1.33333	C	T	missense_variant	MODERATE	MPN022	p.Ala231Val	gene
28700	p2_2_S2	2	28016	0	77	76	1	1.31579	A	C	missense_variant	MODERATE	MPN022	p.His234Pro	gene
28701	p2_2_S2	2	28036	3.06061e-17	75	74	1	1.35135	TTT	ATA	missense_variant	MODERATE	MPN022	p.Phe241Ile	gene
28702	p2_2_S2	2	28048	1.89876e-15	74	73	1	1.36986	A	G	missense_variant	MODERATE	MPN022	p.Asn245Asp	gene
28703	p2_2_S2	2	28050	3.6765e-15	79	78	1	1.28205	TGT	CGC	missense_variant	MODERATE	MPN022	p.Val246Ala	gene
28704	p2_2_S2	2	28058	3.75984e-15	83	82	1	1.21951	T	A	missense_variant	MODERATE	MPN022	p.Val248Glu	gene
28705	p2_2_S2	2	28060	3.88768e-15	83	82	1	1.21951	TTAA	CTAG	missense_variant	MODERATE	MPN022	p.Lys250Glu	gene
28706	p2_2_S2	2	28067	5.53005e-15	79	78	1	1.28205	A	G	missense_variant	MODERATE	MPN022	p.Asp251Gly	gene
28707	p2_2_S2	2	28071	7.30756e-15	75	74	1	1.35135	A	G	synonymous_variant	LOW	MPN022	p.Lys252Lys	gene
28708	p2_2_S2	2	28096	0	73	72	1	1.38889	T	C	missense_variant	MODERATE	MPN022	p.Phe261Leu	gene
28709	p2_2_S2	2	28138	2.64484e-15	81	80	1	1.25	C	G	missense_variant	MODERATE	MPN022	p.Arg275Gly	gene
28710	p2_2_S2	2	28140	0	80	79	1	1.26582	T	C	synonymous_variant	LOW	MPN022	p.Arg275Arg	gene
28711	p2_2_S2	2	28160	1.75538e-15	83	82	1	1.21951	T	C	missense_variant	MODERATE	MPN022	p.Leu282Ser	gene
28712	p2_2_S2	2	28172	3.52982e-15	79	78	1	1.28205	A	G	missense_variant	MODERATE	MPN022	p.Asn286Ser	gene
28713	p2_2_S2	2	28179	0	84	83	1	1.20482	CGG	TGA	missense_variant	MODERATE	MPN022	p.Gly289Glu	gene
28714	p2_2_S2	2	28202	0	86	85	1	1.17647	A	G	missense_variant	MODERATE	MPN022	p.Asn296Ser	gene
28715	p2_2_S2	2	28210	0	85	84	1	1.19048	A	G	missense_variant	MODERATE	MPN022	p.Thr299Ala	gene
28716	p2_2_S2	2	28222	0	91	90	1	1.11111	C	T	missense_variant	MODERATE	MPN022	p.His303Tyr	gene
28717	p2_2_S2	2	28223	3.38292e-15	88	87	1	1.14943	A	C	missense_variant	MODERATE	MPN022	p.His303Pro	gene
28718	p2_2_S2	2	28254	0	89	88	1	1.13636	T	G	missense_variant	MODERATE	MPN023	p.Cys4Gly	essential
28719	p2_2_S2	2	28263	0	84	83	1	1.20482	ACC	TCT	missense_variant	MODERATE	MPN023	p.Thr7Ser	essential
28720	p2_2_S2	2	28274	2.78774e-15	81	80	1	1.25	TTA	CTG	missense_variant	MODERATE	MPN023	p.Tyr11Cys	essential
28721	p2_2_S2	2	28283	1.12654e-15	83	82	1	1.21951	CTCG	TTCA	synonymous_variant	LOW	MPN023	p.15	essential
28722	p2_2_S2	2	28305	7.15712e-15	84	83	1	1.20482	C	T	missense_variant	MODERATE	MPN023	p.His21Tyr	essential
28723	p2_2_S2	2	28307	7.68684e-16	86	85	1	1.17647	TG	AC	missense_variant	MODERATE	MPN023	p.HisAla21GlnPro	essential
28724	p2_2_S2	2	28320	0	89	88	1	1.13636	A	G	missense_variant	MODERATE	MPN023	p.Ile26Val	essential
28725	p2_2_S2	2	28325	6.7955e-15	89	88	1	1.13636	A	T	missense_variant	MODERATE	MPN023	p.Leu27Phe	essential
28726	p2_2_S2	2	28331	0	87	86	1	1.16279	T	G	missense_variant	MODERATE	MPN023	p.Asp29Glu	essential
28727	p2_2_S2	2	28342	1.96114e-16	91	90	1	1.11111	G	A	missense_variant	MODERATE	MPN023	p.Arg33Gln	essential
28728	p2_2_S2	2	28345	0	93	91	2	2.1978	ATAAA	TTAAT	missense_variant	MODERATE	MPN023	p.TyrLys34PheAsn	essential
28729	p2_2_S2	2	28364	7.01421e-15	93	92	1	1.08696	T	A	stop_gained	HIGH	MPN023	p.Tyr40*	essential
28730	p2_2_S2	2	28375	2.27521e-15	96	95	1	1.05263	TTC	CTG	missense_variant	MODERATE	MPN023	p.PheLeu44SerVal	essential
28731	p2_2_S2	2	28385	0	103	102	1	0.980392	TAC	AAT	missense_variant	MODERATE	MPN023	p.Thr48Met	essential
28732	p2_2_S2	2	28401	0	109	108	1	0.925926	A	T	missense_variant	MODERATE	MPN023	p.Asn53Tyr	essential
28733	p2_2_S2	2	28403	3.88768e-15	106	103	3	2.91262	C	G	missense_variant	MODERATE	MPN023	p.Asn53Lys	essential
28734	p2_2_S2	2	28407	0	102	101	1	0.990099	ATTGAAA	TTTCAAC	missense_variant	MODERATE	MPN023	p.IleGluSer55PheGlnArg	essential
28735	p2_2_S2	2	28427	1.72571e-15	99	98	1	1.02041	TTTAG	ATTAA	missense_variant	MODERATE	MPN023	p.SerLeuGly61ArgLeuSer	essential
28736	p2_2_S2	2	28437	0	104	102	2	1.96078	G	A	missense_variant	MODERATE	MPN023	p.Asp65Asn	essential
28737	p2_2_S2	2	28443	1.82342e-15	96	95	1	1.05263	C	A	missense_variant	MODERATE	MPN023	p.Gln67Lys	essential
28738	p2_2_S2	2	28465	0	93	92	1	1.08696	TGGCT	AGGCA	missense_variant	MODERATE	MPN023	p.Val74Glu	essential
28739	p2_2_S2	2	28471	2.48639e-15	94	92	2	2.17391	A	T	missense_variant	MODERATE	MPN023	p.Tyr76Phe	essential
28740	p2_2_S2	2	28483	1.87615e-15	90	89	1	1.1236	TGTG	AGTA	stop_gained	HIGH	MPN023	p.MetTrp80*	essential
28741	p2_2_S2	2	28496	1.60494e-15	92	91	1	1.0989	A	T	missense_variant	MODERATE	MPN023	p.Leu84Phe	essential
28742	p2_2_S2	2	28502	0	88	87	1	1.14943	TAACT	CAACA	missense_variant	MODERATE	MPN023	p.Phe88Ile	essential
28743	p2_2_S2	2	28513	0	81	80	1	1.25	A	T	missense_variant	MODERATE	MPN023	p.His90Leu	essential
28744	p2_2_S2	2	28538	6.0294e-16	73	72	1	1.38889	TC	AT	missense_variant	MODERATE	MPN023	p.SerHis98ArgTyr	essential
28745	p2_2_S2	2	28545	2.71688e-16	69	68	1	1.47059	G	C	missense_variant	MODERATE	MPN023	p.Ala101Pro	essential
28746	p2_2_S2	2	28590	0	68	67	1	1.49254	ATT	TTA	missense_variant	MODERATE	MPN023	p.Ile116Leu	essential
28747	p2_2_S2	2	28605	4.97467e-16	73	72	1	1.38889	T	G	missense_variant	MODERATE	MPN023	p.Trp121Gly	essential
28748	p2_2_S2	2	28655	2.27521e-15	69	68	1	1.47059	T	C	synonymous_variant	LOW	MPN023	p.Asp137Asp	essential
28749	p2_2_S2	2	28736	1.1768e-14	71	65	6	9.23077	T	A	missense_variant	MODERATE	MPN023	p.Ser164Arg	essential
28750	p2_2_S2	2	28782	0	75	74	1	1.35135	A	T	missense_variant	MODERATE	MPN023	p.Thr180Ser	essential
28751	p2_2_S2	2	28784	0	80	79	1	1.26582	CC	GG	missense_variant	MODERATE	MPN023	p.Pro181Ala	essential
28752	p2_2_S2	2	28814	5.37914e-15	88	87	1	1.14943	C	A	missense_variant	MODERATE	MPN023	p.Asn190Lys	essential
28753	p2_2_S2	2	28816	0	90	88	2	2.27273	ACT	GCA	missense_variant	MODERATE	MPN023	p.AsnPhe191SerIle	essential
28754	p2_2_S2	2	28820	0	80	79	1	1.26582	C	G	missense_variant	MODERATE	MPN023	p.Phe192Leu	essential
28755	p2_2_S2	2	28864	1.75538e-15	83	82	1	1.21951	T	A	missense_variant	MODERATE	MPN023	p.Val207Glu	essential
28756	p2_2_S2	2	28890	0	75	74	1	1.35135	G	A	missense_variant	MODERATE	MPN023	p.Asp216Asn	essential
28757	p2_2_S2	2	28894	5.68049e-15	70	69	1	1.44928	A	G	missense_variant	MODERATE	MPN023	p.Asn217Ser	essential
28758	p2_2_S2	2	28904	7.3231e-15	75	74	1	1.35135	G	C	synonymous_variant	LOW	MPN023	p.Thr220Thr	essential
28759	p2_2_S2	2	28912	2.64484e-15	81	80	1	1.25	T	C	missense_variant	MODERATE	MPN023	p.Val223Ala	essential
28760	p2_2_S2	2	28920	0	89	88	1	1.13636	G	A	missense_variant	MODERATE	MPN023	p.Asp226Asn	essential
28761	p2_2_S2	2	28928	1.97409e-15	87	86	1	1.16279	G	T	missense_variant	MODERATE	MPN023	p.Leu228Phe	essential
28762	p2_2_S2	2	28929	1.17009e-16	78	77	1	1.2987	T	C	missense_variant	MODERATE	MPN023	p.Phe229Leu	essential
28763	p2_2_S2	2	28953	0	82	80	2	2.5	T	G	missense_variant	MODERATE	MPN023	p.Phe237Val	essential
28764	p2_2_S2	2	28978	0	73	72	1	1.38889	A	G	missense_variant	MODERATE	MPN023	p.Asn245Ser	essential
28765	p2_2_S2	2	28990	2.21518e-15	81	77	4	5.19481	ACAAT	GCAGT	missense_variant	MODERATE	MPN023	p.AsnAsn249SerSer	essential
28766	p2_2_S2	2	28995	0	84	82	2	2.43902	AAT	GAC	missense_variant	MODERATE	MPN023	p.Asn251Asp	essential
28767	p2_2_S2	2	29032	6.25777e-16	83	82	1	1.21951	GCGAAAT	ACGGAAC	missense_variant	MODERATE	MPN023	p.ArgGluIle263HisGlyThr	essential
28768	p2_2_S2	2	29059	8.63092e-16	85	84	1	1.19048	A	G	missense_variant	MODERATE	MPN023	p.Tyr272Cys	essential
28769	p2_2_S2	2	29091	0	68	65	3	4.61538	AAACTA	TAATTA	stop_gained	HIGH	MPN023	p.Lys283*	essential
28770	p2_2_S2	2	29107	0	63	62	1	1.6129	TTC	ATG	missense_variant	MODERATE	MPN023	p.PheLeu288TyrVal	essential
28771	p2_2_S2	2	29116	4.92735e-15	60	58	2	3.44828	A	C	missense_variant	MODERATE	MPN023	p.His291Pro	essential
28772	p2_2_S2	2	29135	7.09685e-15	71	70	1	1.42857	T	A	synonymous_variant	LOW	MPN023	p.Gly297Gly	essential
28773	p2_2_S2	2	29150	0	64	63	1	1.5873	G	A	missense_variant	MODERATE	MPN023	p.Met302Ile	essential
28774	p2_2_S2	2	29167	3.81964e-15	61	60	1	1.66667	A	G	missense_variant	MODERATE	MPN023	p.Asn308Ser	essential
28775	p2_2_S2	2	29194	2.80281e-15	72	71	1	1.40845	C	G	missense_variant	MODERATE	MPN023	p.Ala317Gly	essential
28776	p2_2_S2	2	29204	0	77	76	1	1.31579	T	C	synonymous_variant	LOW	MPN023	p.Gly320Gly	essential
28777	p2_2_S2	2	29214	2.0492e-15	65	64	1	1.5625	A	T	missense_variant	MODERATE	MPN023	p.Thr324Ser	essential
28778	p2_2_S2	2	29226	0	70	69	1	1.44928	TTA	CTG	synonymous_variant	LOW	MPN023	p.329	essential
28779	p2_2_S2	2	29232	6.67543e-15	66	64	2	3.125	AAAGAAATG	GTAGACATG	missense_variant	MODERATE	MPN023	p.LysGlu330ValAsp	essential
28780	p2_2_S2	2	29248	5.2965e-15	71	68	3	4.41176	ACAAGGACA	GCTAGGTCT	stop_gained	HIGH	MPN023	p.AspLysAspAsn335*	essential
28781	p2_2_S2	2	29262	0	72	70	2	2.85714	TGTAGTA	GGTGGCA	missense_variant	MODERATE	MPN023	p.CysSer340GlyGly	essential
28782	p2_2_S2	2	29334	2.1097e-15	78	77	1	1.2987	A	T	missense_variant	MODERATE	MPN023	p.Thr364Ser	essential
28783	p2_2_S2	2	29336	8.96759e-16	92	90	2	2.22222	C	T	synonymous_variant	LOW	MPN023	p.Thr364Thr	essential
28784	p2_2_S2	2	29338	8.7816e-16	85	84	1	1.19048	T	C	missense_variant	MODERATE	MPN023	p.Phe365Ser	essential
28785	p2_2_S2	2	29348	0	77	76	1	1.31579	C	T	synonymous_variant	LOW	MPN023	p.Ile368Ile	essential
28786	p2_2_S2	2	29390	1.75538e-15	83	82	1	1.21951	A	T	missense_variant	MODERATE	MPN023	p.Gln382His	essential
28787	p2_2_S2	2	29446	2.96102e-15	85	84	1	1.19048	ACACC	GCACT	missense_variant	MODERATE	MPN023	p.Asp401Gly	essential
28788	p2_2_S2	2	29458	5.42434e-15	88	86	2	2.32558	ATAACTTC	GTAGCATC	missense_variant	MODERATE	MPN023	p.AsnAsnPhe405SerSerIle	essential
28789	p2_2_S2	2	29469	0	86	85	1	1.17647	T	A	missense_variant	MODERATE	MPN023	p.Phe409Ile	essential
28790	p2_2_S2	2	29470	1.60494e-15	92	91	1	1.0989	T	A	missense_variant	MODERATE	MPN023	p.Phe409Tyr	essential
28791	p2_2_S2	2	29485	3.39045e-15	88	87	1	1.14943	A	T	missense_variant	MODERATE	MPN023	p.Asn414Ile	essential
28792	p2_2_S2	2	29500	3.31723e-16	82	81	1	1.23457	T	G	missense_variant	MODERATE	MPN023	p.Leu419Arg	essential
28793	p2_2_S2	2	29517	0	81	80	1	1.25	A	T	stop_gained	HIGH	MPN023	p.Lys425*	essential
28794	p2_2_S2	2	29521	0	76	75	1	1.33333	T	C	missense_variant	MODERATE	MPN023	p.Leu426Ser	essential
28795	p2_2_S2	2	29530	5.53005e-15	79	78	1	1.28205	A	C	missense_variant	MODERATE	MPN023	p.Gln429Pro	essential
28796	p2_2_S2	2	29531	0	77	75	2	2.66667	GTTAA	CTTAT	stop_gained	HIGH	MPN023	p.GlnLeuLys429*	essential
28797	p2_2_S2	2	29541	0	71	70	1	1.42857	T	G	missense_variant	MODERATE	MPN023	p.Trp433Gly	essential
28798	p2_2_S2	2	29559	0	77	75	2	2.66667	ACA	TCT	missense_variant	MODERATE	MPN023	p.Thr439Ser	essential
28799	p2_2_S2	2	29577	2.75219e-16	78	77	1	1.2987	AAG	TAC	missense_variant	MODERATE	MPN023	p.Lys445Tyr	essential
28800	p2_2_S2	2	29580	0	84	83	1	1.20482	CAAT	TAGC	stop_gained	HIGH	MPN023	p.Gln446*	essential
28801	p2_2_S2	2	29585	0	77	76	1	1.31579	A	T	missense_variant	MODERATE	MPN023	p.Leu447Phe	essential
28802	p2_2_S2	2	29594	0	72	71	1	1.40845	T	C	synonymous_variant	LOW	MPN023	p.Ala450Ala	essential
28803	p2_2_S2	2	29615	4.89698e-16	73	72	1	1.38889	G	A	synonymous_variant	LOW	MPN023	p.Val457Val	essential
28804	p2_2_S2	2	29625	8.28954e-16	72	70	2	2.85714	TTGTTAGC	ATGTAAGC	stop_gained	HIGH	MPN023	p.LeuLeu461*	essential
28805	p2_2_S2	2	29642	5.68049e-15	70	69	1	1.44928	A	G	synonymous_variant	LOW	MPN023	p.Leu466Leu	essential
28806	p2_2_S2	2	29652	4.03082e-15	64	62	2	3.22581	AGTACCCAG	TGAACCCAG	missense_variant	MODERATE	MPN023	p.Ser470Trp	essential
28807	p2_2_S2	2	29667	6.05059e-17	71	68	3	4.41176	GACC	AACT	missense_variant	MODERATE	MPN023	p.Asp475Asn	essential
28808	p2_2_S2	2	29685	2.71688e-16	69	68	1	1.47059	G	A	missense_variant	MODERATE	MPN023	p.Ala481Thr	essential
28809	p2_2_S2	2	29697	6.94641e-15	80	79	1	1.26582	A	T	missense_variant	MODERATE	MPN023	p.Ser485Cys	essential
28810	p2_2_S2	2	29701	0	74	71	3	4.22535	AGACCCACC	TGACTCACG	missense_variant	MODERATE	MPN023	p.LysThrHisLeu486MetThrHisVal	essential
28811	p2_2_S2	2	29728	2.27521e-15	69	68	1	1.47059	T	C	missense_variant	MODERATE	MPN023	p.Leu495Pro	essential
28812	p2_2_S2	2	29731	2.26038e-15	69	68	1	1.47059	A	C	missense_variant	MODERATE	MPN023	p.Gln496Pro	essential
28813	p2_2_S2	2	29747	4.82399e-16	73	72	1	1.38889	A	G	synonymous_variant	LOW	MPN023	p.Ala501Ala	essential
28814	p2_2_S2	2	29754	6.26083e-15	73	71	2	2.8169	ATTCAACC	GTTTAACT	stop_gained	HIGH	MPN023	p.IleGlnPro504*	essential
28815	p2_2_S2	2	29766	0	76	75	1	1.33333	TTTAAA	ATAAAG	missense_variant	MODERATE	MPN023	p.Phe508Ile	essential
28816	p2_2_S2	2	29780	4.59562e-16	82	81	1	1.23457	TTAAT	ATAAA	upstream_gene_variant	MODIFIER	MPN024	c.-24_-20delTTAATinsATAAA	intergenic
28817	p2_2_S2	2	29792	0	86	84	2	2.38095	GATT	AATA	upstream_gene_variant	MODIFIER	MPN024	c.-12_-9delGATTinsAATA	intergenic
28818	p2_2_S2	2	29796	5.16819e-15	84	83	1	1.20482	A	G	upstream_gene_variant	MODIFIER	MPN024	c.-8A>G	intergenic
28819	p2_2_S2	2	29822	0	100	98	2	2.04082	T	A	missense_variant	MODERATE	MPN024	p.Tyr7Asn	essential
28820	p2_2_S2	2	29843	3.23954e-15	97	96	1	1.04167	G	C	missense_variant	MODERATE	MPN024	p.Ala14Pro	essential
28821	p2_2_S2	2	29852	5.22846e-15	97	96	1	1.04167	A	G	missense_variant	MODERATE	MPN024	p.Ile17Val	essential
28822	p2_2_S2	2	29864	0	91	90	1	1.11111	C	T	stop_gained	HIGH	MPN024	p.Gln21*	essential
28823	p2_2_S2	2	29866	0	95	94	1	1.06383	A	G	synonymous_variant	LOW	MPN024	p.Gln21Gln	essential
28824	p2_2_S2	2	29875	7.02174e-15	93	92	1	1.08696	G	C	synonymous_variant	LOW	MPN024	p.Ala24Ala	essential
28825	p2_2_S2	2	29910	0	95	94	1	1.06383	T	A	missense_variant	MODERATE	MPN024	p.Val36Glu	essential
28826	p2_2_S2	2	29929	1.24331e-15	97	96	1	1.04167	CT	TA	missense_variant	MODERATE	MPN024	p.Ser43Thr	essential
28827	p2_2_S2	2	29948	5.01775e-15	93	92	1	1.08696	A	C	missense_variant	MODERATE	MPN024	p.Asn49His	essential
28828	p2_2_S2	2	29976	2.99869e-15	103	102	1	0.980392	TTT	ATC	missense_variant	MODERATE	MPN024	p.Phe58Tyr	essential
28829	p2_2_S2	2	29982	0	96	92	4	4.34783	AAGACCCT	ATGACTCT	missense_variant	MODERATE	MPN024	p.GluAspPro60AspAspSer	essential
28830	p2_2_S2	2	29997	0	96	95	1	1.05263	T	A	missense_variant	MODERATE	MPN024	p.Val65Asp	essential
28831	p2_2_S2	2	30015	5.29721e-17	100	99	1	1.0101	A	G	missense_variant	MODERATE	MPN024	p.Asn71Ser	essential
28832	p2_2_S2	2	30034	0	103	102	1	0.980392	C	T	synonymous_variant	LOW	MPN024	p.Phe77Phe	essential
28833	p2_2_S2	2	30041	6.49414e-15	107	106	1	0.943396	T	A	missense_variant	MODERATE	MPN024	p.Phe80Ile	essential
28834	p2_2_S2	2	30059	1.46203e-15	101	100	1	1	A	G	missense_variant	MODERATE	MPN024	p.Ile86Val	essential
28835	p2_2_S2	2	30104	6.93087e-15	80	79	1	1.26582	T	A	missense_variant	MODERATE	MPN024	p.Tyr101Asn	essential
28836	p2_2_S2	2	30129	0	73	72	1	1.38889	A	T	missense_variant	MODERATE	MPN024	p.Lys109Met	essential
28837	p2_2_S2	2	30141	5.68049e-15	70	69	1	1.44928	A	G	missense_variant	MODERATE	MPN024	p.Glu113Gly	essential
28838	p2_2_S2	2	30199	3.51075e-15	88	87	1	1.14943	AAT	GAC	missense_variant	MODERATE	MPN024	p.Ile133Thr	essential
28839	p2_2_S2	2	30225	3.28521e-15	85	84	1	1.19048	TTCGC	ATCGT	missense_variant	MODERATE	MPN024	p.Phe141Tyr	essential
28840	p2_2_S2	2	30256	0	81	80	1	1.25	A	C	missense_variant	MODERATE	MPN025	p.Ile5Leu	gene
28841	p2_2_S2	2	30276	0	82	80	2	2.5	C	T	synonymous_variant	LOW	MPN025	p.His11His	gene
28842	p2_2_S2	2	30288	3.23224e-15	97	96	1	1.04167	C	T	synonymous_variant	LOW	MPN025	p.His15His	gene
28843	p2_2_S2	2	30290	3.23954e-15	97	96	1	1.04167	A	G	missense_variant	MODERATE	MPN025	p.His16Arg	gene
28844	p2_2_S2	2	30316	0	89	88	1	1.13636	A	C	missense_variant	MODERATE	MPN025	p.Asn25His	gene
28845	p2_2_S2	2	30318	1.62754e-15	92	91	1	1.0989	T	A	missense_variant	MODERATE	MPN025	p.Asn25Lys	gene
28846	p2_2_S2	2	30350	0	86	85	1	1.17647	CGGCT	TGGCA	missense_variant	MODERATE	MPN025	p.Ala36Val	gene
28847	p2_2_S2	2	30369	0	85	84	1	1.19048	T	C	synonymous_variant	LOW	MPN025	p.Ser42Ser	gene
28848	p2_2_S2	2	30374	0	77	76	1	1.31579	T	C	missense_variant	MODERATE	MPN025	p.Ile44Thr	gene
28849	p2_2_S2	2	30379	0	89	88	1	1.13636	GTC	ATT	missense_variant	MODERATE	MPN025	p.Val46Ile	gene
28850	p2_2_S2	2	30408	9.90931e-16	85	84	1	1.19048	TATTTC	AAATTT	stop_gained	HIGH	MPN025	p.TyrIleSer55*	gene
28851	p2_2_S2	2	30421	1.97409e-15	87	86	1	1.16279	C	G	missense_variant	MODERATE	MPN025	p.Gln60Glu	gene
28852	p2_2_S2	2	30425	0	98	97	1	1.03093	T	G	missense_variant	MODERATE	MPN025	p.Val61Gly	gene
28853	p2_2_S2	2	30434	1.96114e-16	91	90	1	1.11111	C	T	missense_variant	MODERATE	MPN025	p.Pro64Leu	gene
28854	p2_2_S2	2	30440	6.26083e-15	83	81	2	2.46914	T	C	missense_variant	MODERATE	MPN025	p.Val66Ala	gene
28855	p2_2_S2	2	30445	2.64484e-15	81	80	1	1.25	G	A	missense_variant	MODERATE	MPN025	p.Gly68Ser	gene
28856	p2_2_S2	2	30451	1.99669e-15	81	80	1	1.25	GTCG	TTCT	missense_variant	MODERATE	MPN025	p.ValAsp70PheTyr	gene
28857	p2_2_S2	2	30464	0	81	80	1	1.25	A	G	missense_variant	MODERATE	MPN025	p.Lys74Arg	gene
28858	p2_2_S2	2	30468	2.1848e-16	85	84	1	1.19048	TACT	AACA	synonymous_variant	LOW	MPN025	p.77	gene
28859	p2_2_S2	2	30490	0	80	79	1	1.26582	T	C	synonymous_variant	LOW	MPN025	p.Leu83Leu	gene
28860	p2_2_S2	2	30562	5.01775e-15	100	95	5	5.26316	T	C	missense_variant	MODERATE	MPN025	p.Ser107Pro	gene
28861	p2_2_S2	2	30563	4.63329e-15	108	107	1	0.934579	CGC	TGT	missense_variant	MODERATE	MPN025	p.SerHis107LeuTyr	gene
28862	p2_2_S2	2	30568	6.35853e-15	116	115	1	0.869565	T	C	synonymous_variant	LOW	MPN025	p.Leu109Leu	gene
28863	p2_2_S2	2	30570	6.87107e-15	102	101	1	0.990099	A	T	missense_variant	MODERATE	MPN025	p.Leu109Phe	gene
28864	p2_2_S2	2	30574	0	114	113	1	0.884956	T	C	missense_variant	MODERATE	MPN025	p.Phe111Leu	gene
28865	p2_2_S2	2	30578	7.27789e-15	101	99	2	2.0202	AAGAAAACTT	AGGGAAGCTC	missense_variant	MODERATE	MPN025	p.GluAsnPhe113GlySerSer	gene
28866	p2_2_S2	2	30589	1.68004e-15	105	104	1	0.961538	A	C	missense_variant	MODERATE	MPN025	p.Thr116Pro	gene
28867	p2_2_S2	2	30595	0	100	99	1	1.0101	T	C	missense_variant	MODERATE	MPN025	p.Ser118Pro	gene
28868	p2_2_S2	2	30604	1.80835e-15	96	95	1	1.05263	T	A	missense_variant	MODERATE	MPN025	p.Leu121Ile	gene
28869	p2_2_S2	2	30628	5.65271e-16	103	102	1	0.980392	A	C	missense_variant	MODERATE	MPN025	p.Asn129His	gene
28870	p2_2_S2	2	30629	0	94	93	1	1.07527	A	T	missense_variant	MODERATE	MPN025	p.Asn129Ile	gene
28871	p2_2_S2	2	30638	0	100	97	3	3.09278	T	G	missense_variant	MODERATE	MPN025	p.Val132Gly	gene
28872	p2_2_S2	2	30650	3.44295e-15	101	100	1	1	T	A	missense_variant	MODERATE	MPN025	p.Val136Glu	gene
28873	p2_2_S2	2	30655	1.31889e-15	110	109	1	0.917431	A	T	missense_variant	MODERATE	MPN025	p.Thr138Ser	gene
28874	p2_2_S2	2	30656	0	115	114	1	0.877193	CCT	GCA	missense_variant	MODERATE	MPN025	p.ThrLeu138SerIle	gene
28875	p2_2_S2	2	30659	0	112	111	1	0.900901	T	A	stop_gained	HIGH	MPN025	p.Leu139*	gene
28876	p2_2_S2	2	30663	0	108	107	1	0.934579	TGGGG	AGGAA	missense_variant	MODERATE	MPN025	p.Glu142Lys	gene
28877	p2_2_S2	2	30669	2.56926e-15	120	119	1	0.840336	AGAA	GGAG	synonymous_variant	LOW	MPN025	p.144	gene
28878	p2_2_S2	2	30673	3.89545e-15	123	122	1	0.819672	GATG	AATA	missense_variant	MODERATE	MPN025	p.AspGly144AsnSer	gene
28879	p2_2_S2	2	30678	6.56972e-15	120	119	1	0.840336	T	A	synonymous_variant	LOW	MPN025	p.Gly145Gly	gene
28880	p2_2_S2	2	30697	4.73123e-15	111	110	1	0.909091	T	C	synonymous_variant	LOW	MPN025	p.Leu152Leu	gene
28881	p2_2_S2	2	30715	5.1536e-15	122	118	4	3.38983	T	A	missense_variant	MODERATE	MPN025	p.Cys158Ser	gene
28882	p2_2_S2	2	30718	0	118	117	1	0.854701	A	G	missense_variant	MODERATE	MPN025	p.Lys159Glu	gene
28883	p2_2_S2	2	30782	0	110	108	2	1.85185	A	T	missense_variant	MODERATE	MPN025	p.Tyr180Phe	gene
28884	p2_2_S2	2	30791	0	102	100	2	2	A	G	missense_variant	MODERATE	MPN025	p.Asn183Ser	gene
28885	p2_2_S2	2	30850	1.96114e-16	91	90	1	1.11111	T	A	missense_variant	MODERATE	MPN025	p.Leu203Ile	gene
28886	p2_2_S2	2	30864	6.10286e-15	92	90	2	2.22222	T	G	synonymous_variant	LOW	MPN025	p.Gly207Gly	gene
28887	p2_2_S2	2	30872	2.48992e-15	90	89	1	1.1236	G	A	missense_variant	MODERATE	MPN025	p.Gly210Glu	gene
28888	p2_2_S2	2	30875	3.60116e-15	92	91	1	1.0989	T	C	missense_variant	MODERATE	MPN025	p.Ile211Thr	gene
28889	p2_2_S2	2	30891	0	90	88	2	2.27273	CAAAAAAGC	CAAAAAAAGC	frameshift_variant	HIGH	MPN025	p.Ala219fs	gene
28890	p2_2_S2	2	30907	7.23481e-16	94	93	1	1.07527	T	A	missense_variant	MODERATE	MPN025	p.Leu222Ile	gene
28891	p2_2_S2	2	30912	0	95	94	1	1.06383	C	A	synonymous_variant	LOW	MPN025	p.Gly223Gly	gene
28892	p2_2_S2	2	30925	2.49769e-15	90	89	1	1.1236	A	C	missense_variant	MODERATE	MPN025	p.Asn228His	gene
28893	p2_2_S2	2	30926	0	87	85	2	2.35294	A	G	missense_variant	MODERATE	MPN025	p.Asn228Ser	gene
28894	p2_2_S2	2	30934	0	90	89	1	1.1236	A	C	missense_variant	MODERATE	MPN025	p.Thr231Pro	gene
28895	p2_2_S2	2	30938	1.88345e-15	86	84	2	2.38095	AAT	GAG	missense_variant	MODERATE	MPN025	p.GluCys232GlyGly	gene
28896	p2_2_S2	2	30942	0	86	84	2	2.38095	TCAAC	ACAAT	missense_variant	MODERATE	MPN025	p.Cys233Trp	gene
28897	p2_2_S2	2	30950	0	84	83	1	1.20482	C	T	missense_variant	MODERATE	MPN025	p.Ala236Val	gene
28898	p2_2_S2	2	30953	0	84	83	1	1.20482	TTGCT	CTGCA	missense_variant	MODERATE	MPN025	p.Phe237Ser	gene
28899	p2_2_S2	2	30970	1.75538e-15	83	82	1	1.21951	G	A	missense_variant	MODERATE	MPN025	p.Glu243Lys	gene
28900	p2_2_S2	2	31000	0	95	94	1	1.06383	A	T	missense_variant	MODERATE	MPN025	p.Thr253Ser	gene
[truncated: 45,873 more rows]

## Sheet: C5_p2_2_S3
	SAMPLE	PASS	POS	QUAL	TOT	REFN	ALTN	FRAC	REF	ALT	EFF	IMPACT	AFF	MUT	ANN_TYPE
[truncated: 62,327 more rows]

[truncated: 12 more sheets: C5_p3_D_S2, C5_p3_D_S3, C5_p3IPTG_A_S1, C5_p3IPTG_A_S1b, C5_p15_F_S1, C5_p15_F_S5, C20_p2_6_S2, C20_p2_6_S4, C20_p3_B_S1, C20_p3_B_S2, C20_p15_7_S3, C20_p15_7_S5]
